# Supplementary material for: Palladium-catalyzed asymmetric allylic alkylation (AAA) with alkyl sulfones as nucleophiles
Source: Royal Society of Chemistry journal article supplement (doi:10.1039/d1sc02599f), 2021-01-01

## Supplementary Materials for

### **Palladium-Catalyzed Asymmetric Allylic Alkylation (AAA) with Alkyl Sulfones as Nucleophiles**

Barry M. Trost\*, Zhiwei Jiao\*, Hadi Gholami

#### **Table of contents**

|                                                           |     |
|-----------------------------------------------------------|-----|
| I. General information-----                               | S2  |
| II. Substrate scope of different sulfone donors-----      | S3  |
| III. Substrate scope of different allylic acceptors ----- | S21 |
| IV. Functional groups transformations-----                | S40 |
| V. Synthesis of the substrates -----                      | S43 |
| VI. CIF check report of <b>3h</b> -----                   | S52 |
| VII. NMR charts-----                                      | S55 |

## I. General information

All experiments were performed under argon. To guarantee exclusion of air and moisture, all glassware was flame-dried under high vacuum and afterwards filled with argon. Tetrahydrofuran (THF) and toluene were refluxed and distilled over sodium/benzophenone. Anhydrous diethylether and anhydrous methanol were purchased from Acros Organics in AcroSeal bottles and were used as received. Chloroform-*d* was stored over potassium carbonate. If not stated otherwise, all starting materials were synthesized according to literature procedures or used in the form they were purchased commercially. The synthesized material was stored under argon at -10 °C until further use.

Proton nuclear magnetic resonance ( $^1\text{H-NMR}$ ) spectra were recorded at 300 MHz using a Varian Inova 300 spectrometer, at 400 MHz using either a Varian 400 or Varian Mercury 400 spectrometer, at 500MHz using a Varian Inova 500 spectrometer, or at 600 MHz using a Varian Inova 600 spectrometer. All  $^1\text{H}$  chemical shifts are reported in ppm relative to the residual solvent peak (7.26 ppm for  $\text{CDCl}_3$ , 7.16 ppm for  $\text{C}_6\text{D}_6$ ). Multiplets were assigned with the assistance of the multiplet tool in Mestrenova, and are abbreviated as follows: s = singlet, d = doublet, t = triplet, q = quartet, m = multiplet, b = broad, app. = apparent. Carbon nuclear magnetic resonance ( $^{13}\text{C-NMR}$ ) spectra were recorded at 75 MHz using a Varian Inova 300 spectrometer, at 101 MHz using either a Varian 400 or Varian Mercury 400 spectrometer, or at 126 MHz using a Varian Inova 500 spectrometer. All  $^{13}\text{C}$  chemical shifts are reported in ppm relative to the center of the residual solvent peak (77.16 ppm for  $\text{CDCl}_3$ ).

Purification by flash column chromatography (FCC) was performed on silica gel (Fisher Scientific, 230–400 mesh, grade 60) using bulk solvent. Analytical thin layer chromatography (TLC) and preparative thin layer chromatography (PTLC) were performed on glass-backed silica-coated plates (Merck TLC Silicagel 60 F<sub>254</sub>).

Visualization was done by UV light ( $\lambda = 254 \text{ nm}$ ) and/or basic potassium permanganate ( $\text{KMnO}_4$ ).

Infrared (IR) spectra were obtained using a Nicolet IR100 FT-IR spectrometer and were measured as thin films from  $\text{CH}_2\text{Cl}_2$  on NaCl plates and all values are given as wavenumbers in  $\text{cm}^{-1}$ . Enantiomeric excess (ee) was determined by high performance liquid chromatography (HPLC) using an Agilent 1200 series HPLC system. Individual retention times and separation conditions are specified for the compounds analyzed by HPLC. High resolution mass spectrometry (HRMS) was performed at University of Illinois at Urbana-Champaign. Crystal structure determination was performed at University of Notre Dame.

## II. Substrate scope of different sulfone donors

**General procedure:** A 5 mL vial was flame-dried with a magnetic stir bar inside, (*R, R, S, S, R, R*)-Cy-Tom ligand **L1** (8.4 mg, 6 mmol %.),  $\text{CpPd}(\eta^3\text{-C}_3\text{H}_5)$  (2 mg, 5 mmol%), (phenylsulfonylmethyl)trimethylsilane **1a** (68 mg, 0.3 mmol) and 2-fluoro-2,3,4,5-tetrahydro-1,1'-biphenyl (35 mg, 0.2 mmol) were added and the system was placed under an atmosphere of argon. The system was then dissolved in dry *t*-BuOMe (0.5 mL) and stirred at RT for 10 min, and then the mixture was placed in an oil bath maintained at 50 °C for 6-12 h. The crude mixture was subjected to flash silica column chromatography (petroleum ether/EtOAc 80:20) to yield the compound (**3a**, 50 mg, 80% yield) as a white solid. The ee value of the pure compound is 94% which was determined by HPLC.

For the non-enantioselective transformations, the same conditions were applied with SPhos (**L6**, CAS: 657408-07-6) as the supporting ligand.

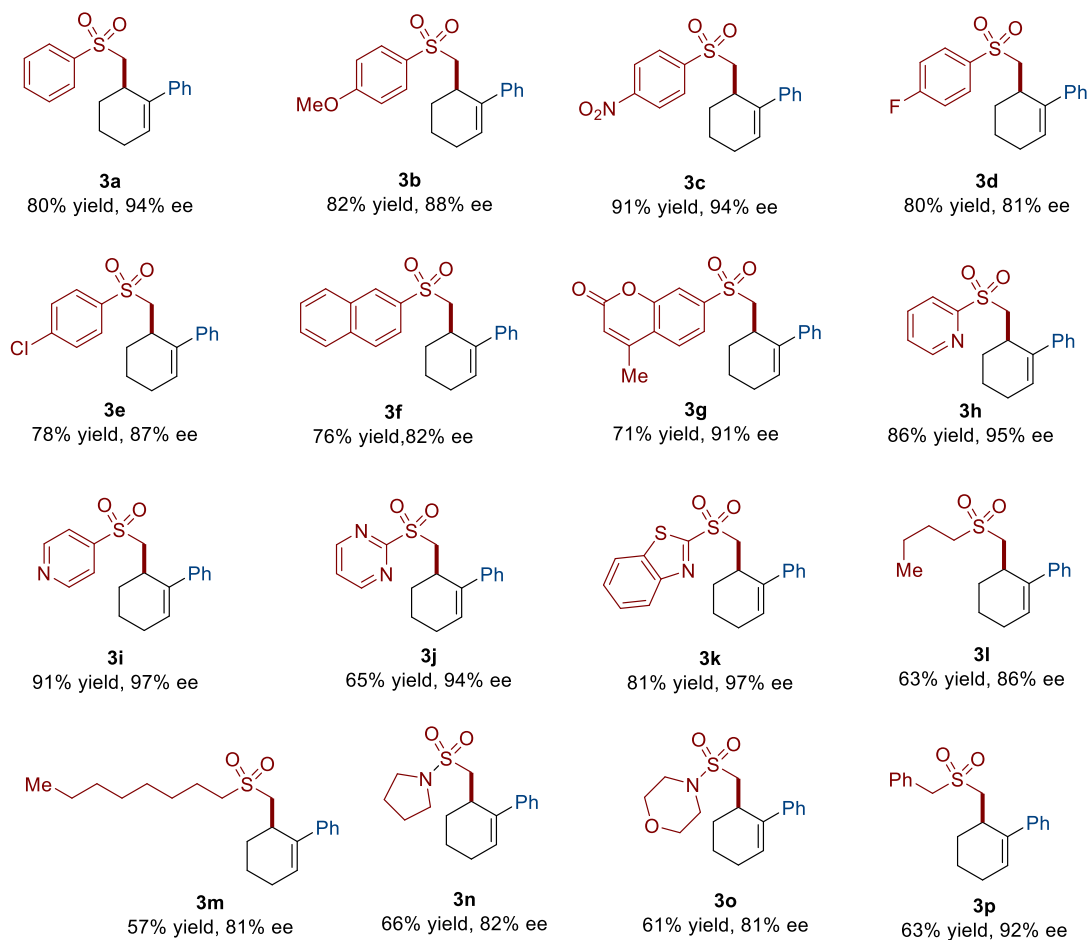

**Figure S-1.** Substrate scope of different sulfone donors

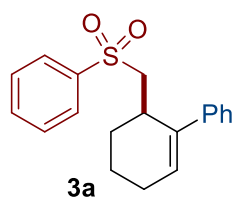

**(R)-2-((Phenylsulfonyl)methyl)-2,3,4,5-tetrahydro-1,1'-biphenyl.**

<sup>1</sup>H-NMR (400 MHz, CDCl<sub>3</sub>): δ 7.82-7.79 (m, 2H), 7.67-7.63 (m, 1H), 7.55-7.51 (m, 2H), 7.18-7.16 (m, 3H), 7.01-6.99 (m, 2H), 6.05-6.03 (m, 1H), 3.27-3.23 (m, 1H), 3.09 (dd, *J* = 16.0, 8.0 Hz, 1H), 2.97-2.93 (m, 1H), 2.30-2.24 (m, 1H), 2.19-2.15 (m, 2H), 1.94-1.86 (m, 1H), 1.74-1.69 (m, 1H), 1.63-1.55 (m, 1H).

<sup>13</sup>C-NMR (101 MHz, CDCl<sub>3</sub>): δ 140.2, 139.5, 138.0, 133.7, 129.4, 129.1, 128.6, 128.2, 127.2, 126.0, 58.1, 30.9, 26.7, 25.8, 17.7.

HRMS-ESI (M+Na)<sup>+</sup>: 335.1082, found: 335.1074.

IR (cm<sup>-1</sup>): 1439, 1296, 1143, 1080, 806, 756, 737, 686.

[ $\alpha$ ]<sub>D</sub><sup>23</sup> = +88.6 (*c* = 5.3, CHCl<sub>3</sub>).

Enantiomeric excess of the product (ee = 94%) was determined by high-performance liquid chromatography (HPLC) using a chiral stationary phase (IB column, flow rate = 0.8 mL min<sup>-1</sup>, eluent: Hept/*i*-PrOH = 95:5, 254 nm absorbance), retention times: major enantiomer (*t*<sub>R</sub> = 10.28 min), minor enantiomer (*t*<sub>R</sub> = 9.99 min).

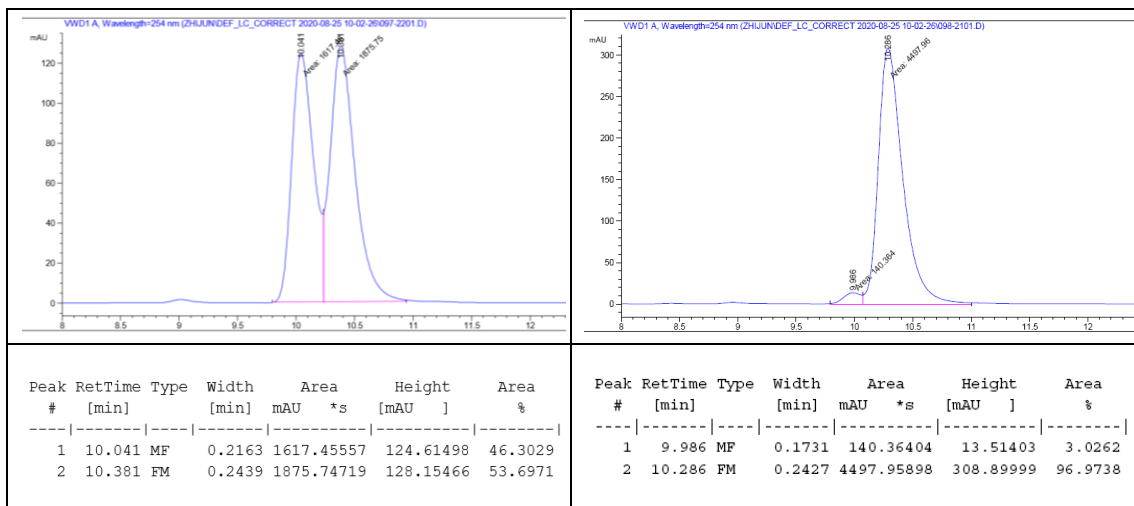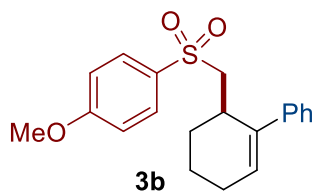

**(R)-2-(((4-Methoxyphenyl)sulfonyl)methyl)-2,3,4,5-tetrahydro-1,1'-biphenyl.**

The reaction was performed on 0.2 mmol scale, ((4-methoxyphenyl)sulfonyl)methyltrimethylsilane (77 mg, 0.3 mmol) and 2-fluoro-2,3,4,5-tetrahydro-1,1'-biphenyl (35 mg, 0.2 mmol) were used and **L1** (8.4 mg) was used as the supporting ligand. The product **3b** was obtained by flash silica column chromatography (petroleum ether/EtOAc 80:20) (56 mg, 82% yield) as a white solid.

<sup>1</sup>H-NMR (400 MHz, CDCl<sub>3</sub>): δ 7.72 (d, *J* = 8.0 Hz, 2H), 7.19-7.17 (m, 3H), 7.03-7.00 (m, 2H), 6.98 (d, *J* = 8.0 Hz, 2H), 6.03 (t, *J* = 4.0 Hz, 1H), 3.89 (s, 3H), 3.24-3.21 (m, 1H), 3.05 (dd, *J* = 16.0, 8.0 Hz, 1H), 2.92 (d, *J* = 16.0 Hz, 1H), 2.27-2.15 (m, 3H), 1.90-1.85 (m, 1H), 1.72-1.68 (m, 1H), 1.59-1.54 (m, 1H).

$^{13}\text{C-NMR}$  (101 MHz,  $\text{CDCl}_3$ ):  $\delta$  163.7, 140.3, 138.17, 131.15, 130.3, 128.9, 128.6, 127.2, 126.1, 114.5, 58.4, 55.8, 31.0, 26.7, 25.9, 17.8.

**HRMS-ESI** ( $\text{M}+\text{Na}$ ) $^+$ : 365.1187, found: 365.1183.

**IR** ( $\text{cm}^{-1}$ ): 1587, 1489, 1288, 1254, 1139, 1083, 756, 744, 695.

$[\alpha]_{\text{D}}^{23} = +94.6$  ( $c = 5.1$ ,  $\text{CHCl}_3$ ).

Enantiomeric excess ( $ee = 88\%$ ) was determined by high-performance liquid chromatography (HPLC) using a chiral stationary phase (AD-H column, flow rate =  $0.8 \text{ mL min}^{-1}$ , eluent: Hept/*i*-PrOH = 95:5, 254 nm absorbance), retention times: major enantiomer ( $t_{\text{R}} = 29.30\text{min}$ ), minor enantiomer ( $t_{\text{R}} = 28.04 \text{ min}$ ).

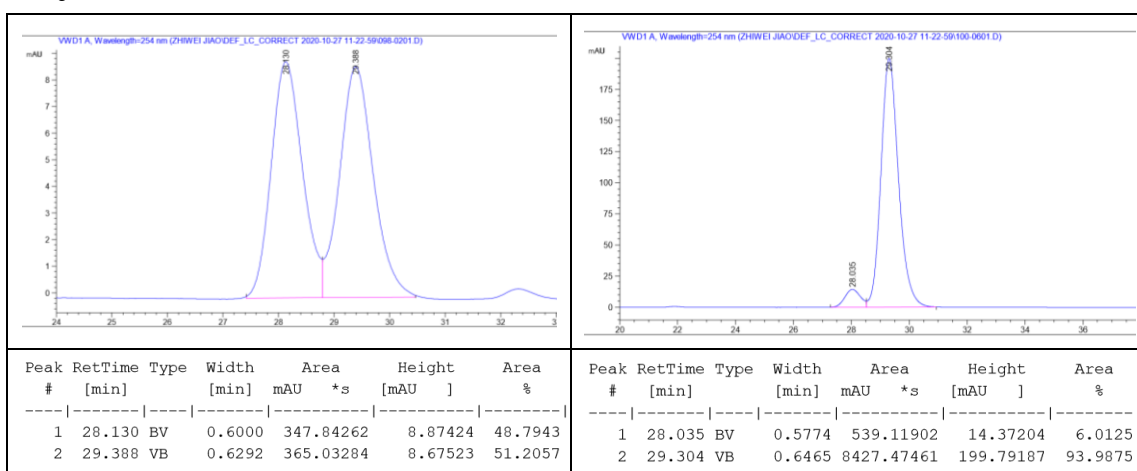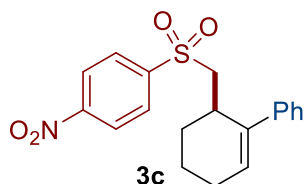

**(R)-2-(((4-Nitrophenyl)sulfonyl)methyl)-2,3,4,5-tetrahydro-1,1'-biphenyl.**

The reaction was performed on 0.2 mmol scale, trimethyl(((4-nitrophenyl)sulfonyl)methyl)silane (82 mg, 0.3 mmol) and 2-fluoro-2,3,4,5-tetrahydro-1,1'-biphenyl (35 mg, 0.2 mmol) were used and **L1** (8.4 mg) was used as the supporting ligand. The product **3c** was obtained by flash silica column chromatography (petroleum ether/EtOAc 85:15) (65 mg, 91% yield) as a pale yellow solid.

$^1\text{H-NMR}$  (400 MHz,  $\text{CDCl}_3$ ):  $\delta$  8.32 (d,  $J = 8.0 \text{ Hz}$ , 2H), 7.96 (d,  $J = 8.0 \text{ Hz}$ , 2H), 7.20-7.15 (m, 3H), 7.02-7.00 (m, 2H), 6.01 (t,  $J = 4.0 \text{ Hz}$ , 1H), 3.27-3.10 (m, 1H),

3.13 (dd,  $J = 16.0, 8.0$  Hz, 1H), 2.98 (d,  $J = 16.0$  Hz, 1H), 2.27-2.16 (m, 3H), 1.98-1.90 (m, 1H), 1.77-1.72 (m, 1H), 1.62-1.55 (m, 1H).

$^{13}\text{C-NMR}$  (101 MHz,  $\text{CDCl}_3$ ):  $\delta$  150.8, 145.2, 140.2, 137.7, 129.52, 129.50, 128.6, 127.4, 126.2, 124.5, 58.1, 31.1, 26.9, 25.7, 17.6.

**HRMS -ESI** ( $\text{M}+\text{Na}$ ) $^+$ : 380.0932, found: 380.0927.

**IR** ( $\text{cm}^{-1}$ ): 1629, 1603, 1526, 1342, 1302, 1143, 1079, 850, 754, 733, 692, 679.

$[\alpha]_{\text{D}}^{24} = +90.0$  ( $c = 5.7, \text{CHCl}_3$ ).

Enantiomeric excess ( $ee = 94\%$ ) was determined by high-performance liquid chromatography (HPLC) using a chiral stationary phase (AD-H column, flow rate =  $0.8 \text{ mL min}^{-1}$ , eluent: Hept/*i*-PrOH = 95:5, 254 nm absorbance), retention times: major enantiomer ( $t_{\text{R}} = 40.23 \text{ min}$ ), minor enantiomer ( $t_{\text{R}} = 31.97 \text{ min}$ ).

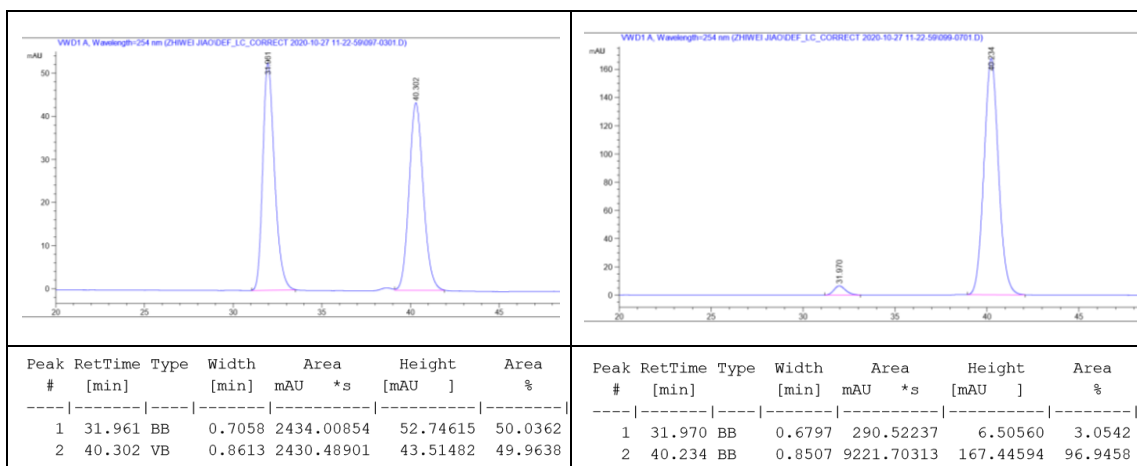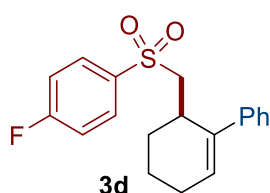

**(*R*)-2-(((4-Fluorophenyl)sulfonyl)methyl)-2,3,4,5-tetrahydro-1,1'-biphenyl.**

The reaction was performed on 0.2 mmol scale, (((4-fluorophenyl)sulfonyl)methyl)trimethylsilane (74 mg, 0.3 mmol) and 2-fluoro-2,3,4,5-tetrahydro-1,1'-biphenyl (35 mg, 0.2 mmol) were used and **L1** (8.3 mg) was used as the supporting ligand. The product **3c** was obtained by flash silica column chromatography (petroleum ether/EtOAc 85:15) (53 mg, 80% yield) as a white solid.

<sup>1</sup>H-NMR (400 MHz, CDCl<sub>3</sub>): δ 7.82-7.79 (m, 2H), 7.21-7.17 (m, 5H), 7.03-7.00 (m, 2H), 6.03 (t, *J* = 4.0 Hz, 1H), .25-3.22 (m, 1H), 3.07 (dd, *J* = 16.0, 8.0 Hz, 1H), 2.93 (d, *J* = 16.0 Hz, 1H), 2.28-2.22 (m, 1H), 2.19-2.16 (m, 2H), 1.94-1.87 (m, 1H), 1.75-1.68 (m, 1H), 1.61-1.54 (m, 1H).

<sup>19</sup>F NMR (376.6 MHz, CDCl<sub>3</sub>): δ -104.15.

<sup>13</sup>C-NMR (101 MHz, CDCl<sub>3</sub>): δ 165.9 (d, *J* = 256.5 Hz), 140.3, 138.1, 135.7 (d, *J* = 3.0 Hz), 131.0 (d, *J* = 9.1 Hz), 129.2, 128.6, 127.3, 126.1, 116.6 (d, *J* = 22.2 Hz), 58.3, 31.1, 26.8, 25.8, 17.7.

HRMS -ESI (M+Na)<sup>+</sup>: 353.0987, found: 353.0983.

IR (cm<sup>-1</sup>): 1637, 1538, 1486, 1283, 1142, 833, 744, 695.

[α]<sub>D</sub><sup>24</sup> = +71.3 (*c* = 2.8, CHCl<sub>3</sub>).

Enantiomeric excess (ee = 81%) was determined by high-performance liquid chromatography (HPLC) using a chiral stationary phase (AD-H column, flow rate = 0.8 mL min<sup>-1</sup>, eluent: Hept/*i*-PrOH = 95:5, 254 nm absorbance), retention times: major enantiomer (*t*<sub>R</sub> = 18.32 min), minor enantiomer (*t*<sub>R</sub> = 15.41 min).

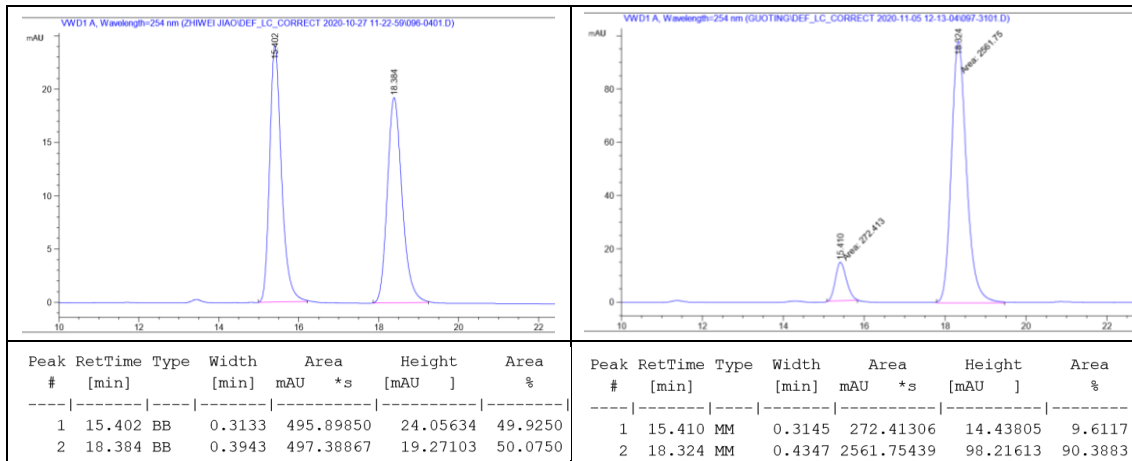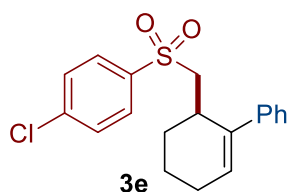

**(R)-2-(((4-Chlorophenyl)sulfonyl)methyl)-2,3,4,5-tetrahydro-1,1'-biphenyl.**

The reaction was performed on 0.2 mmol scale, (((4-chlorophenyl)sulfonyl)methyl)trimethylsilane (79 mg, 0.3 mmol) and



2-fluoro-2,3,4,5-tetrahydro-1,1'-biphenyl (35 mg, 0.2 mmol) were used and **L1** (8.3 mg) was used as the supporting ligand. The product **3e** was obtained by flash silica column chromatography (petroleum ether/EtOAc 85:15) (54 mg, 78% yield) as a colorless oil.

<sup>1</sup>H-NMR (400 MHz, CDCl<sub>3</sub>): δ 7.72 (d, *J* = 8.0 Hz, 2H), 7.48 (d, *J* = 8.0 Hz, 2H), 7.20-7.16 (m, 3H), 7.01-6.99 (m, 2H), 6.02 (t, *J* = 4.0 Hz, 1H), 3.22-3.21 (m, 1H), 3.07 (dd, *J* = 16.0, 8.0 Hz, 1H), 2.92 (d, *J* = 16.0 Hz 1H), 2.28-2.21 (m, 1H), 2.19-2.15 (m, 1H), 1.94-1.87 (m, 1H), 1.75-1.70 (m, 1H), 1.61-1.54 (m, 1H).

<sup>13</sup>C-NMR (101 MHz, CDCl<sub>3</sub>): δ 140.5, 140.3, 138.0, 129.69, 129.66, 129.66, 129.2, 128.6, 127.3, 126.1, 58.2, 31.1, 26.8, 25.8, 17.7.

HRMS-ESI (M+Na)<sup>+</sup>: 369.0692, found: 369.0680.

IR (cm<sup>-1</sup>): 1581, 1475, 1395, 1311, 1278, 1, 1088, 1013, 810, 758, 735, 698, 624.

[α]<sub>D</sub><sup>24</sup> = +163.8 (*c* = 3.0, CHCl<sub>3</sub>).

Enantiomeric excess (ee = 87%) was determined by high-performance liquid chromatography (HPLC) using a chiral stationary phase (AD-H column, flow rate = 0.8 mL min<sup>-1</sup>, eluent: Hept/*i*-PrOH = 95:5, 254 nm absorbance), retention times: major enantiomer (*t*<sub>R</sub> = 19.10 min), minor enantiomer (*t*<sub>R</sub> = 16.01 min).

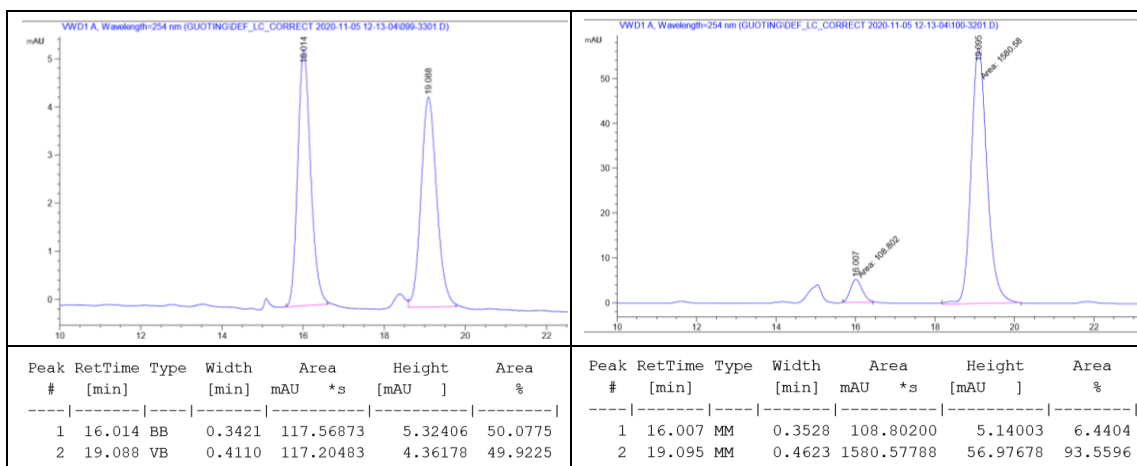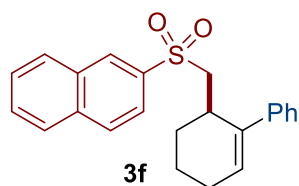

(*R*)-2-(((2,3,4,5-Tetrahydro-[1,1'-biphenyl]-2-yl)methyl)sulfonyl)naphthalene

The reaction was performed on 0.2 mmol scale, trimethyl((naphthalen-2-ylsulfonyl)methyl)silane (84 mg, 0.3 mmol) and 2-fluoro-2,3,4,5-tetrahydro-1,1'-biphenyl (35 mg, 0.2 mmol) were used and **L1** (8.4 mg) was used as the supporting ligand. The product **3f** was obtained by flash silica column chromatography (petroleum ether/EtOAc 85:15) (55 mg, 76% yield) as a white solid.

**<sup>1</sup>H-NMR** (400 MHz, CDCl<sub>3</sub>): δ 8.40 (s, 1H), 7.97-7.94 (m, 3H), 7.75-7.64 (m, 3H), 7.09 (t, *J* = 8.0 Hz, 1H), 6.99 (t, *J* = 8.0 Hz, 2H), 6.92-6.90 (m, 2H), 6.01 (t, *J* = 4.0 Hz, 1H), 3.28-3.25 (m, 1H), 3.15 (dd, *J* = 16.0, 12.0 Hz, 1H), 3.03 (d, *J* = 16.0 Hz, 1H), 2.34-2.28 (m, 1H), 2.18-2.15 (m, 1H), 1.97-1.88 (m, 1H), 1.75-1.69 (m, 1H), 1.63-1.59 (m, 1H).

**<sup>13</sup>C-NMR** (101 MHz, CDCl<sub>3</sub>): δ 140.2, 138.1, 136.3, 135.4, 132.3, 129.9, 129.64, 129.58, 129.4, 129.0, 128.5, 128.1, 127.8, 127.1, 126.0, 122.9, 58.2, 31.1, 26.8, 25.9, 17.8.

**HRMS -ESI** (M+Na)<sup>+</sup>: 385.1238, found: 385.1235.

**IR** (cm<sup>-1</sup>): 1447, 1346, 1304, 1268, 1242, 1189, 1148, 1125, 1072, 908, 870, 818, 754, 698, 658, 614.

$[\alpha]_D^{24} = +97.6$  (*c* = 3.4, CHCl<sub>3</sub>).

Enantiomeric excess (ee = 82%) was determined by high-performance liquid chromatography (HPLC) using a chiral stationary phase (IB column, flow rate = 0.6 mL min<sup>-1</sup>, eluent: Hept/*i*-PrOH = 95:5, 254 nm absorbance), retention times: major enantiomer (*t*<sub>R</sub> = 15.56 min), minor enantiomer (*t*<sub>R</sub> = 14.77 min).

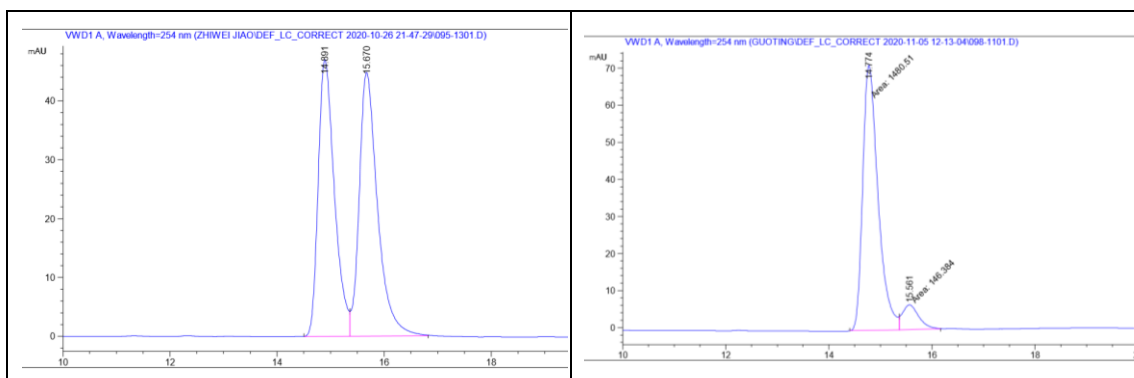

| Peak # | RetTime [min] | Type | Width [min] | Area mAU   | Area *s   | Height [mAU] | Area % | Peak # | RetTime [min] | Type | Width [min] | Area mAU   | Area *s  | Height [mAU] | Area % |
|--------|---------------|------|-------------|------------|-----------|--------------|--------|--------|---------------|------|-------------|------------|----------|--------------|--------|
| 1      | 14.037        | BB   | 0.4031      | 2894.45313 | 108.97269 | 50.8622      |        | 1      | 14.774        | MF   | 0.3450      | 1480.51392 | 71.51909 | 91.0023      |        |
| 2      | 27.289        | BB   | 0.9670      | 2796.32397 | 42.66730  | 49.1378      |        | 2      | 15.561        | FM   | 0.3657      | 146.38376  | 6.67154  | 8.9977       |        |

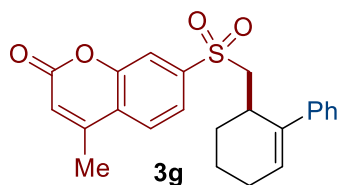

**(*R*)-4-Methyl-7-(((2,3,4,5-tetrahydro-[1,1'-biphenyl]-2-yl)methyl)sulfonyl)-2H-chromen-2-one.**

The reaction was performed on 0.2 mmol scale, 6-(((trimethylsilyl)methyl)sulfonyl)-2H-chromen-2-one (89 mg, 0.3 mmol) and 2-fluoro-2,3,4,5-tetrahydro-1,1'-biphenyl (35 mg, 0.2 mmol) were used and **L1** (8.3 mg) was used as the supporting ligand, as the solubility of this sulfone is not very good in *t*-BuOMe, 1,4-dioxane was used as solvent. The product **3g** was obtained by flash silica column chromatography (petroleum ether/EtOAc 60:40) (56 mg, 71% yield) as a yellow solid.

<sup>1</sup>H-NMR (400 MHz, CDCl<sub>3</sub>): δ 7.73-7.66 (m, 3H), 7.17-7.13 (m, 3H), 7.03-7.01 (m, 2H), 6.45 (s, 1H), 6.00 (t, *J* = 4.0 Hz, 1H), 3.28-3.26 (m, 1H), 3.11 (dd, *J* = 16.0, 12.0 Hz, 1H), 2.98 (d, *J* = 16.0 Hz, 1H), 2.49 (s, 3H), 2.24-2.15 (m, 3H), 1.97-1.90 (m, 1H), 1.73-1.70 (m, 1H), 1.62-1.53 (m, 1H).

<sup>13</sup>C-NMR (101 MHz, CDCl<sub>3</sub>): δ 159.3, 153.4, 151.0, 142.3, 140.3, 137.9, 129.3, 128.5, 127.31, 126.2, 125.9, 124.0, 123.2, 118.0, 117.1, 58.2, 31.1, 26.9, 25.73, 18.9, 17.7.

HRMS-ESI (M+H)<sup>+</sup>: 395.1317, found: 395.1304.

IR (cm<sup>-1</sup>): 1742, 1627, 1444, 1403, 1328, 1308, 1246, 1223, 1177, 1145, 1086, 958, 870, 758, 700, 651, 622.

[α]<sub>D</sub><sup>24</sup> = +96.9 (*c* = 4.1, CHCl<sub>3</sub>).

Enantiomeric excess (ee = 91%) was determined by high-performance liquid chromatography (HPLC) using a chiral stationary phase (IB column, flow rate = 0.8 mL min<sup>-1</sup>, eluent: Hept/*i*-PrOH = 80:20, 254 nm absorbance), retention times: major

enantiomer ( $t_R = 26.51$  min), minor enantiomer ( $t_R = 28.34$  min).

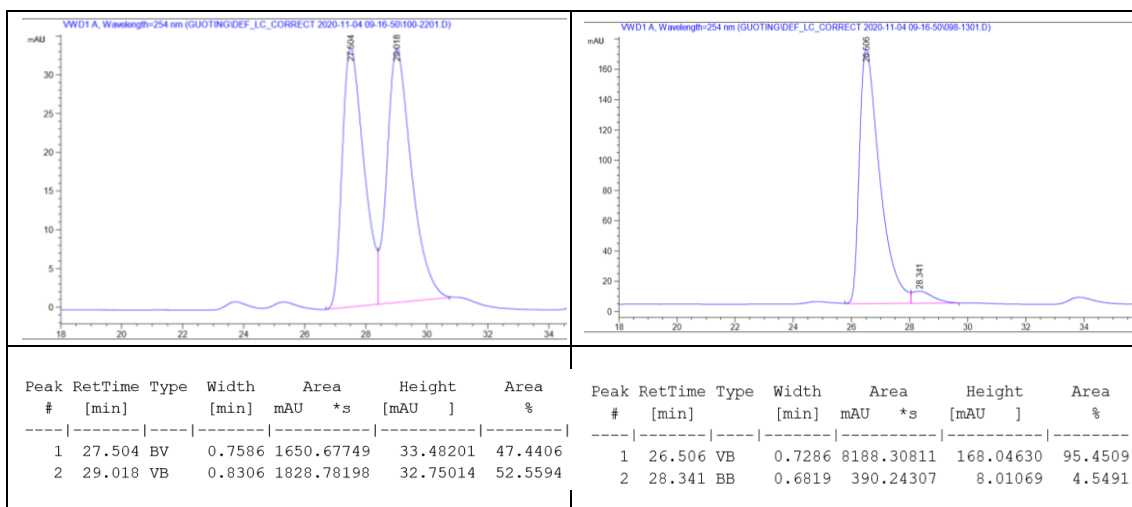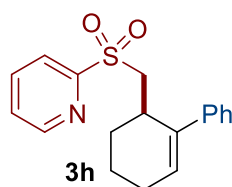

**(R)-2-(((2,3,4,5-Tetrahydro-[1,1'-biphenyl]-2-yl)methyl)sulfonyl)pyridine.**

The reaction was performed on 0.2 mmol scale, 2-(((trimethylsilyl)methyl)sulfonyl)pyridine (69 mg, 0.3 mmol) and 2-fluoro-2,3,4,5-tetrahydro-1,1'-biphenyl (35 mg, 0.2 mmol) were used and **L1** (8.3 mg) was used as the supporting ligand. The product **3h** was obtained by flash silica column chromatography (petroleum ether/EtOAc 60:40) (54 mg, 86% yield) as a white solid. The compound was recrystallized for acetone/hexanes to afford the single crystal, which was subjected to X-ray diffraction.

<sup>1</sup>H-NMR (400 MHz, CDCl<sub>3</sub>): δ 8.63 (d, *J* = 8.0 Hz, 1H), 8.05 (d, *J* = 8.0 Hz, 1H), 7.93-7.90 (m, 1H), 7.53-7.50 (m, 1H), 7.24-7.19 (m, 3H), 7.16-7.14 (m 2H), 6.03 (t, *J* = 4.0 Hz, 1H), 3.41-3.40 (m, 1H), 3.38 (dd, *J* = 16.0, 8.0 Hz, 1H), 3.26 (d, *J* = 12.0 Hz, 1H), 2.19-2.14 (m, 3H), 1.90-1.84 (m, 1H), 1.70-1.61 (m, 2H).

<sup>13</sup>C-NMR (101 MHz, CDCl<sub>3</sub>): δ 157.6, 150.3, 140.4, 138.22, 138.20, 129.1, 128.6, 127.3, 127.2, 126.2, 122.2, 54.2, 30.7, 26.9, 25.8, 17.6.

HRMS-ESI (M+Na)<sup>+</sup>: 336.1034, found: 336.1027.

IR (cm<sup>-1</sup>): 1577, 1451, 1427, 1306, 1162, 1111, 1081, 809, 751, 698.

$[\alpha]_{\text{D}}^{23} = +75.4$  ( $c = 0.6$ ,  $\text{CHCl}_3$ ).

Enantiomeric excess ( $ee = 95\%$ ) was determined by high-performance liquid chromatography (HPLC) using a chiral stationary phase (IB column, flow rate =  $0.8 \text{ mL min}^{-1}$ , eluent: Hept/*i*-PrOH = 95:5, 254 nm absorbance), retention times: major enantiomer ( $t_{\text{R}} = 25.24 \text{ min}$ ), minor enantiomer ( $t_{\text{R}} = 23.92 \text{ min}$ ).

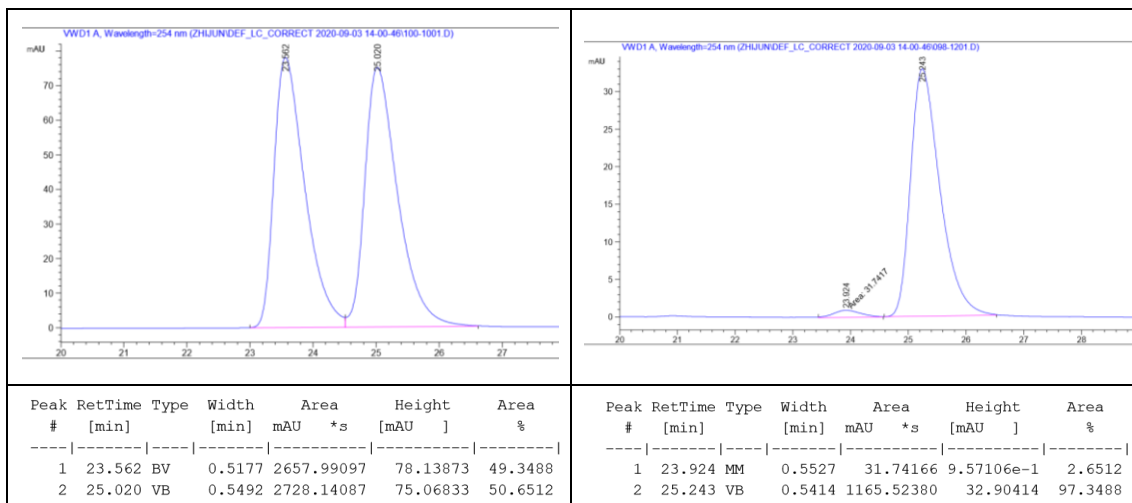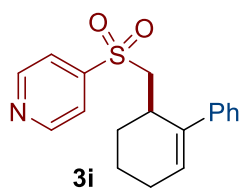

**(R)-4-(((2,3,4,5-tetrahydro-[1,1'-biphenyl]-2-yl)methyl)sulfonyl)pyridine.**

The reaction was performed on 0.2 mmol scale, 4-(((trimethylsilyl)methyl)sulfonyl)pyridine (69 mg, 0.3 mmol) and 2-fluoro-2,3,4,5-tetrahydro-1,1'-biphenyl (35 mg, 0.2 mmol) were used and **L1** (8.3 mg) was used as the supporting ligand. The product **3i** was obtained by flash silica column chromatography (petroleum ether/EtOAc 50:50) (57 mg, 91% yield) as a pale yellow oil.

$^1\text{H-NMR}$  (400 MHz,  $\text{CDCl}_3$ ):  $\delta$  8.84 (d,  $J = 4.0 \text{ Hz}$ , 2H), 7.62 (d,  $J = 4.0 \text{ Hz}$ , 2H), 7.20-7.18 (m, 3H), 7.02-6.99 (m, 1H), 6.02 (t,  $J = 4.0 \text{ Hz}$ , 1H), 3.26-3.23 (m, 1H), 3.10 (dd,  $J = 16.0, 12.0 \text{ Hz}$ , 1H), 2.95 (d,  $J = 12.0 \text{ Hz}$ , 1H), 2.27-2.15 (m, 3H), 1.98-1.89 (m, 1H), 1.74-1.71 (m, 1H), 1.61-1.54 (m, 1H).

$^{13}\text{C-NMR}$  (101 MHz,  $\text{CDCl}_3$ ):  $\delta$  151.3, 147.4, 140.1, 137.7, 129.4, 128.7, 127.4,

126.1, 121.2, 57.6, 31.0, 26.8, 25.7, 17.6.

**HRMS-ESI** (M+H)<sup>+</sup>: 314.1216, found: 314.1215.

**IR** (cm<sup>-1</sup>): 2921, 1631, 1565, 1396, 1305, 1148, 1093, 813, 749, 696.

[ $\alpha$ ]<sub>D</sub><sup>23</sup> = +85.6 (*c* = 6.2, CHCl<sub>3</sub>).

Enantiomeric excess (ee = 97%) was determined by high-performance liquid chromatography (HPLC) using a chiral stationary phase (AD-H column, flow rate = 0.8 mL min<sup>-1</sup>, eluent: Hept/*i*-PrOH = 90:10, 254 nm absorbance), retention times: major enantiomer (*t*<sub>R</sub> = 16.703 min), minor enantiomer (*t*<sub>R</sub> = 14.31 min).

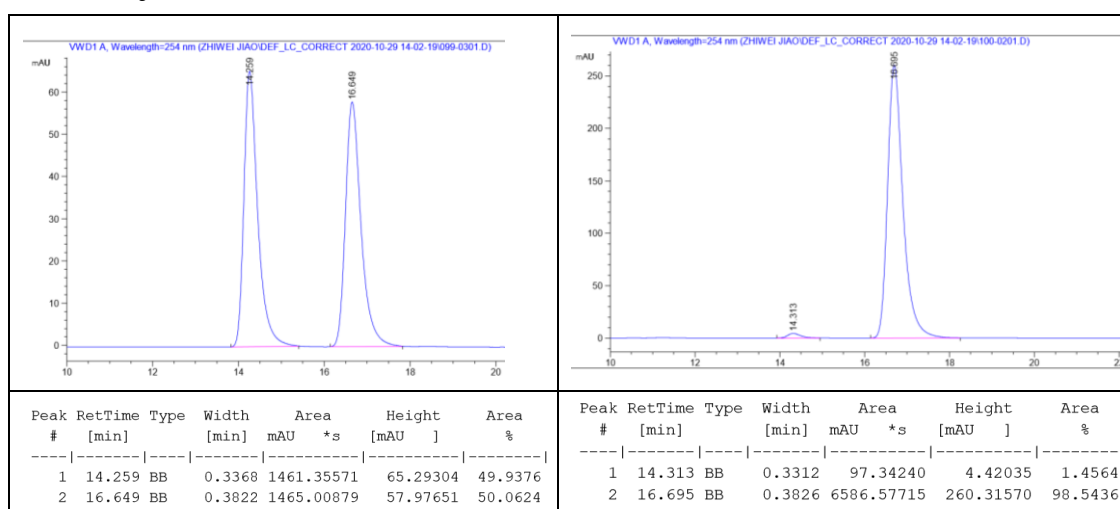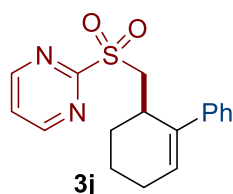

**(R)-2-(((2,3,4,5-Tetrahydro-[1,1'-biphenyl]-2-yl)methyl)sulfonyl)pyrimidine.**

The reaction was performed on 0.2 mmol scale, 2-(((trimethylsilyl)methyl)sulfonyl)pyrimidine (69 mg, 0.3 mmol) and 2-fluoro-2,3,4,5-tetrahydro-1,1'-biphenyl (35 mg, 0.2 mmol) were used and **L1** (8.3 mg) was used as the supporting ligand. The product **3j** was obtained by flash silica column chromatography (petroleum ether/EtOAc 50:50) (41 mg, 65% yield) as a yellow oil.

<sup>1</sup>H-NMR (400 MHz, CDCl<sub>3</sub>):  $\delta$  8.86 (s, 1H), 7.51 (t, *J* = 8.0 Hz, 1H), 7.25-7.20 (m, 5H), 6.05 (t, *J* = 4.0 Hz, 1H), 3.53-3.52 (m, 1H), 3.49 (t, *J* = 12.0 Hz, 1H), 3.42 (d, *J* =

12.0 Hz, 1H), 2.23-2.18 (m, 1H), 1.97-1.90 (m, 1H), 1.73-1.58 (m, 2H).

$^{13}\text{C-NMR}$  (101 MHz,  $\text{CDCl}_3$ ):  $\delta$  166.1, 158.7, 140.5, 138.3, 129.3, 128.6, 127.3, 126.4, 123.7, 53.6, 30.7, 27.1, 25.8.

**HRMS-ESI** ( $\text{M}+\text{Na}$ ) $^+$ : 337.0987 found: 337.0977.

**IR** ( $\text{cm}^{-1}$ ): 1670, 1565, 1445, 1386, 1312, 1250, 1213, 1123, 989, 814, 758, 699, 613.

$[\alpha]_{\text{D}}^{24} = +116.1$  ( $c = 2.5$ ,  $\text{CHCl}_3$ ).

Enantiomeric excess ( $ee = 94\%$ ) was determined by high-performance liquid chromatography (HPLC) using a chiral stationary phase (OD-H column, flow rate =  $0.8 \text{ mL min}^{-1}$ , eluent: Hept/*i*-PrOH = 90:10, 254 nm absorbance), retention times: major enantiomer ( $t_{\text{R}} = 70.20 \text{ min}$ ), minor enantiomer ( $t_{\text{R}} = 74.28 \text{ min}$ ).

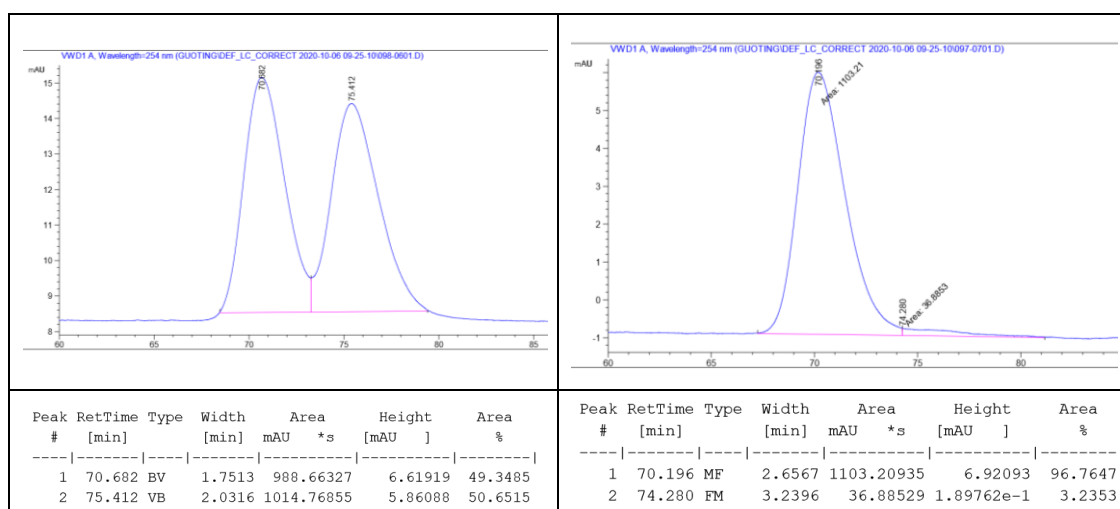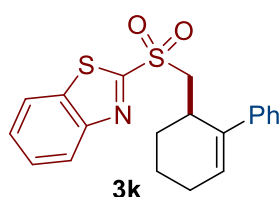

**(R)-2-(((2,3,4,5-Tetrahydro-[1,1'-biphenyl]-2-yl)methyl)sulfonyl)benzo[d]thiazole.**

The reaction was performed on 0.2 mmol scale, 2-(((trimethylsilyl)methyl)sulfonyl)benzo[d]thiazole (86 mg, 0.3 mmol) and 2-fluoro-2,3,4,5-tetrahydro-1,1'-biphenyl (35 mg, 0.2 mmol) were used and **L1** (8.3 mg) was used as the supporting ligand. The product **3k** was obtained by flash silica column chromatography (petroleum ether/EtOAc 85:15) (60 mg, 81% yield) as a yellow solid.

<sup>1</sup>H-NMR (400 MHz, CDCl<sub>3</sub>): δ 8.17 (d, *J* = 8.0 Hz, 1H), 8.00 (d, *J* = 8.0 Hz, 1H), 7.67-7.58 (m, 2H), 7.12-7.01 (m, 5H), 6.04 (t, *J* = 4.0 Hz, 1H), 3.52-3.48 (m, 1H), 3.45-3.36 (m, 2H), 2.29-2.23 (m, 1H), 2.21-2.19 (m, 2H), 2.00-1.93 (m, 1H), 1.76-1.71 (m, 1H), 1.68-1.60 (m, 1H).

<sup>13</sup>C-NMR (101 MHz, CDCl<sub>3</sub>): δ 166.0, 152.8, 140.1, 137.9, 137.0, 129.4, 128.5, 128.1, 127.7, 127.3, 126.2, 125.7, 122.4, 57.1, 31.1, 27.0, 25.8, 17.5.

HRMS-ESI (M+H)<sup>+</sup>: 370.0935, found: 370.0927.

IR (cm<sup>-1</sup>): 1642, 1548, 1486, 1464, 1416, 1329, 1310, 1231, 1184, 1144, 1078, 1018, 864, 847, 756, 726, 694, 623.

[α]<sub>D</sub><sup>24</sup> = +106.0 (*c* = 5.6, CHCl<sub>3</sub>).

Enantiomeric excess (ee = 97%) was determined by high-performance liquid chromatography (HPLC) using a chiral stationary phase (OD-H column, flow rate = 0.8 mL min<sup>-1</sup>, eluent: Hept/*i*-PrOH = 90:10, 254 nm absorbance), retention times: major enantiomer (*t*<sub>R</sub> = 13.09 min), minor enantiomer (*t*<sub>R</sub> = 11.95 min).

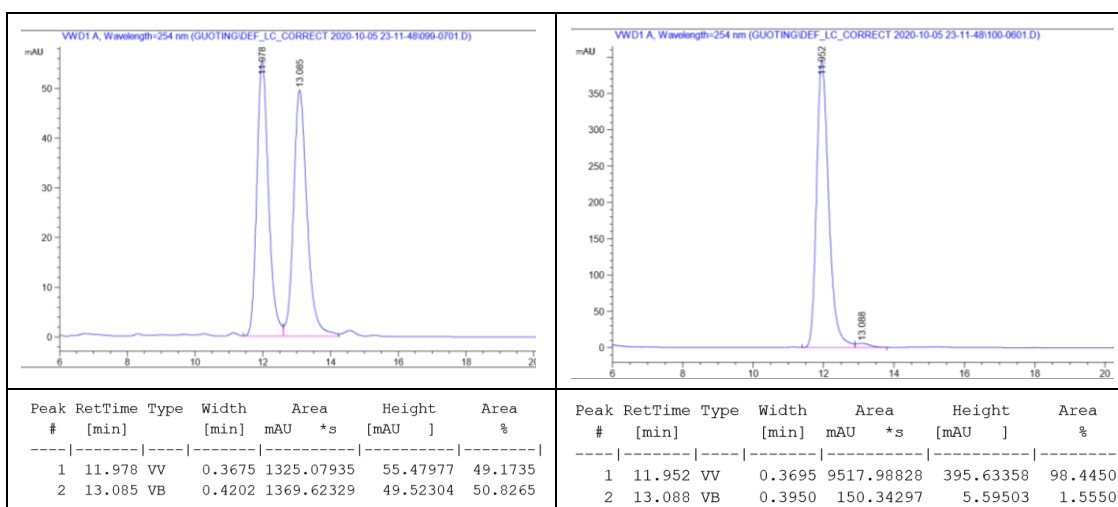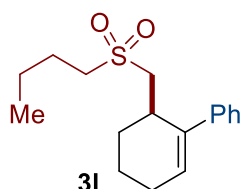

**(R)-2-((Butylsulfonyl)methyl)-2,3,4,5-tetrahydro-1,1'-biphenyl.**

The reaction was performed on 0.2 mmol scale, ((butylsulfonyl)methyl)trimethylsilane (62 mg, 0.3 mmol) and



2-fluoro-2,3,4,5-tetrahydro-1,1'-biphenyl (35 mg, 0.2 mmol) were used and **L1** (8.3 mg) was used as the supporting ligand. The product **3I** was obtained by flash silica column chromatography (petroleum ether/EtOAc 90:10) (37 mg, 63% yield) as a white solid.

<sup>1</sup>H-NMR (400 MHz, CDCl<sub>3</sub>): δ 7.26-7.24 (m, 4H), 7.20-7.17 (m, 1H), 5.99 (t, *J* = 4.0 Hz, 1H), 3.41 (brs, 1H), 2.85-2.72 (m, 4H), 2.18-2.11 (m, 3H), 1.94-1.90 (m, 1H), 1.58-1.49 (m, 4H), 1.32-1.23 (m, 2H), 0.80 (t, *J* = 8.0 Hz, 3H).

<sup>13</sup>C-NMR (101 MHz, CDCl<sub>3</sub>): δ 140.7, 138.4, 129.1, 128.8, 127.5, 126.4, 54.6, 53.8, 30.5, 27.3, 25.8, 24.0, 21.8, 17.7, 13.6.

HRMS-ESI (M+Na)<sup>+</sup>: 315.1395, found: 315.1397

IR (cm<sup>-1</sup>): 1451, 1312, 1295, 1271, 1130, 1099, 1066, 752, 694.

[α]<sub>D</sub><sup>24</sup> = +78.4 (*c* = 3.2, CHCl<sub>3</sub>).

Enantiomeric excess (ee = 86%) was determined by high-performance liquid chromatography (HPLC) using a chiral stationary phase (IB column, flow rate = 0.8 mL min<sup>-1</sup>, eluent: Hept/*i*-PrOH = 98:2, 254 nm absorbance), retention times: major enantiomer (*t*<sub>R</sub> = 12.66 min), minor enantiomer (*t*<sub>R</sub> = 13.71 min).

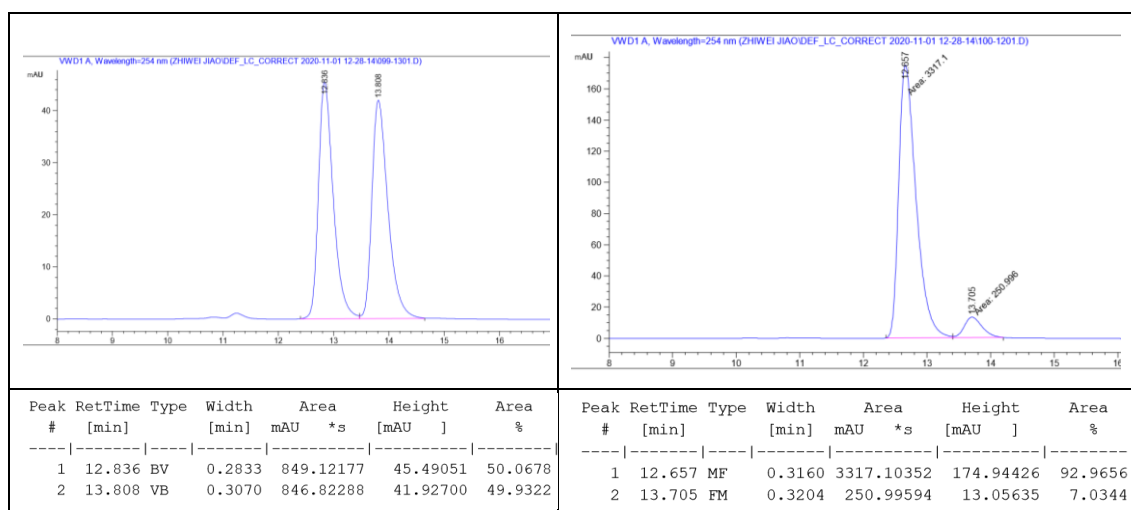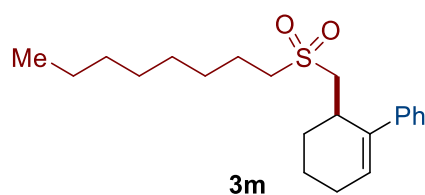

**(R)-2-((Octylsulfonyl)methyl)-2,3,4,5-tetrahydro-1,1'-biphenyl.**

The reaction was performed on 0.2 mmol scale, trimethyl((octylsulfonyl)methyl)silane (79 mg, 0.3 mmol) and 2-fluoro-2,3,4,5-tetrahydro-1,1'-biphenyl (35 mg, 0.2 mmol) were used and **L1** (8.3 mg) was used as the supporting ligand. The product **3m** was obtained by flash silica column chromatography (petroleum ether/EtOAc 90:10) (40 mg, 57% yield) as a colorless oil.

<sup>1</sup>H-NMR (400 MHz, CDCl<sub>3</sub>): δ 7.34-7.33 (m, 4H), 7.28-7.25 (m, 1H), 6.07 (t, *J* = 4.0 Hz, 1H), 3.48 (brs, 1H), 2.93-2.79 (m, 4H), 2.25-2.19 (m, 3H), 1.74-1.64 (m, 1H), 1.62-1.55 (m, 4H), 1.30-1.24 (m, 10H), 0.87 (t, *J* = 8.0 Hz, 3H).

<sup>13</sup>C-NMR (101 MHz, CDCl<sub>3</sub>): δ 140.8, 138.5, 129.2, 128.8, 127.5, 126.5, 54.6, 54.1, 31.8, 30.6, 29.1, 29.0, 28.6, 27.4, 25.9, 22.7, 22.1, 17.8, 14.2.

HRMS-ESI (M+Na)<sup>+</sup>: 371.2021, found: 371.2015.

IR (cm<sup>-1</sup>): 1467, 1299, 1259, 1132, 757, 699, 618.

[α]<sub>D</sub><sup>24</sup> = +56.3 (*c* = 1.0, CHCl<sub>3</sub>).

Enantiomeric excess (ee = 81%) was determined by high-performance liquid chromatography (HPLC) using a chiral stationary phase (IB column, flow rate = 0.8 mL min<sup>-1</sup>, eluent: Hept/*i*-PrOH = 98:2, 254 nm absorbance), retention times: major enantiomer (*t*<sub>R</sub> = 11.16 min), minor enantiomer (*t*<sub>R</sub> = 12.56 min).

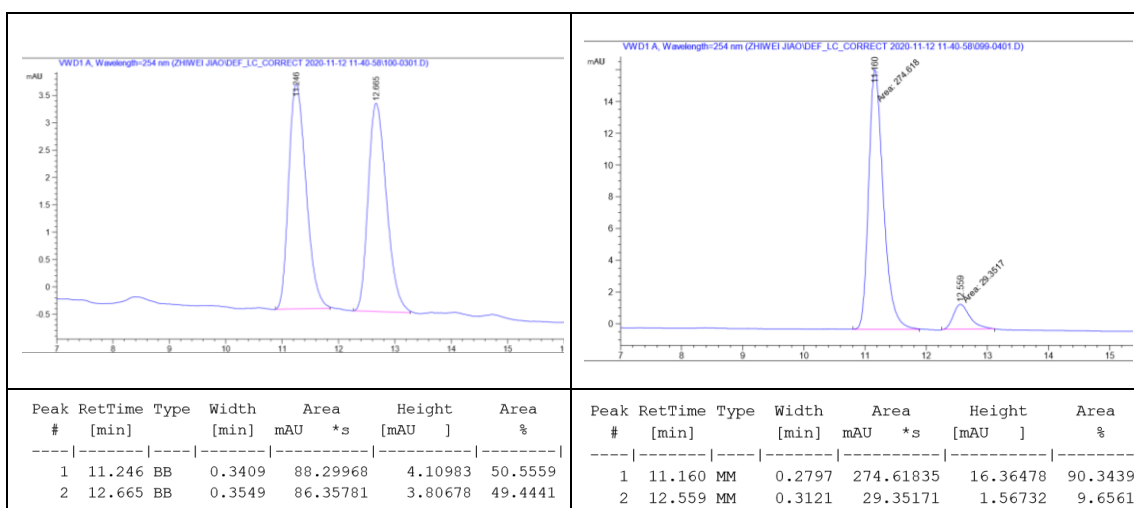

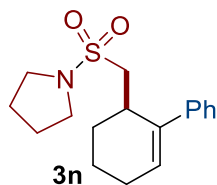

**(*R*)-1-(((2,3,4,5-Tetrahydro-[1,1'-biphenyl]-2-yl)methyl)sulfonyl)pyrrolidine.**

The reaction was performed on 0.2 mmol scale, 1-(((trimethylsilyl)methyl)sulfonyl)pyrrolidine (66 mg, 0.3 mmol) and 2-fluoro-2,3,4,5-tetrahydro-1,1'-biphenyl (35 mg, 0.2 mmol) were used and **L1** (8.3 mg) was used as the supporting ligand. The product **3n** was obtained by flash silica column chromatography (petroleum ether/EtOAc 85:15) (40 mg, 66% yield) as a pale yellow solid.

<sup>1</sup>H-NMR (400 MHz, CDCl<sub>3</sub>): δ 7.37-7.30 (m, 4H), 7.27-7.23 (m, 1H), 6.08 (t, *J* = 4.0 Hz, 1H), 3.39 (brs, 1H), 3.22-3.17 (m, 4H), 2.87 (d, *J* = 4.0 Hz, 2H), 2.29-2.17 (m, 3H), 1.98-1.92 (m, 1H), 1.86-1.82 (m, 4H), 1.76-1.71 (m, 1H), 1.66-1.59 (m, 1H).

<sup>13</sup>C-NMR (101 MHz, CDCl<sub>3</sub>): δ 140.8, 138.6, 128.7, 128.7, 127.3, 126.4, 51.4, 47.7, 31.6, 26.9, 26.0, 25.9, 17.9.

HRMS-ESI (M+Na)<sup>+</sup>: 328.1347, found: 328.1339.

IR (cm<sup>-1</sup>): 1453, 1316, 1253, 1197, 1143, 1063, 1010, 795, 759, 695, 620.

[α]<sub>D</sub><sup>24</sup> = +34.9 (*c* = 1.2, CHCl<sub>3</sub>).

Enantiomeric excess (ee = 82%) was determined by high-performance liquid chromatography (HPLC) using a chiral stationary phase (AD-H column, flow rate = 0.8 mL min<sup>-1</sup>, eluent: Hept/*i*-PrOH = 99:1, 254 nm absorbance), retention times: major enantiomer (*t*<sub>R</sub> = 27.77 min), minor enantiomer (*t*<sub>R</sub> = 26.26 min).

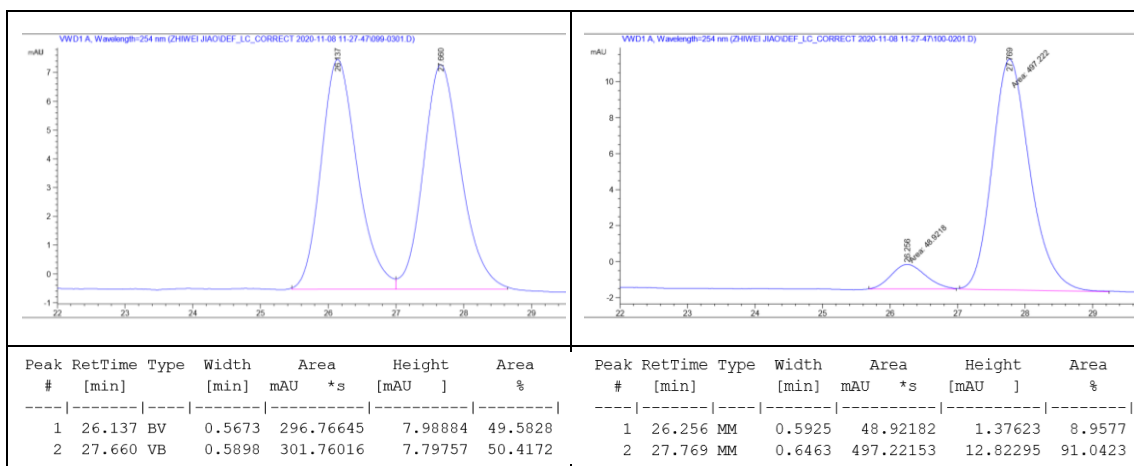

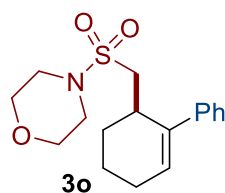

**(R)-4-(((2,3,4,5-Tetrahydro-[1,1'-biphenyl]-2-yl)methyl)sulfonyl)morpholine.**

The reaction was performed on 0.2 mmol scale, 4-(((trimethylsilyl)methyl)sulfonyl)morpholine (71 mg, 0.3 mmol) and 2-fluoro-2,3,4,5-tetrahydro-1,1'-biphenyl (35 mg, 0.2 mmol) were used and **L1** (8.3 mg) was used as the supporting ligand. The product **3o** was obtained by flash silica column chromatography (petroleum ether/EtOAc 80:20) (39 mg, 61% yield) as a white solid.

<sup>1</sup>H-NMR (400 MHz, CDCl<sub>3</sub>): δ 7.35-7.33 m, 4H), 7.29-7.24 (m, 1H), 6.09 (t, *J* = 4.0 Hz, 1H), 3.68 (t, *J* = 4.0 Hz, 4H), 3.41 (brs, 1H), 3.08 (t, *J* = 4.0 Hz, 4H), 2.81-2.78 (m, 2H), 2.26-2.19 (m, 3H), 2.00-1.93 (m, 1H), 1.75-1.72 (m, 1H), 1.65-1.61 (m, 1H).

<sup>13</sup>C-NMR (101 MHz, CDCl<sub>3</sub>): δ 140.8, 138.7, 129.0, 128.8, 127.5, 126.4, 66.6, 50.4, 45.7, 31.4, 26.9, 25.9, 17.9.

HRMS-ESI (M+Na)<sup>+</sup>: 344.1296, found: 344.1288.

IR (cm<sup>-1</sup>): 1452, 1345, 1318, 1261, 1154, 1114, 1073, 950, 755, 697.

[α]<sub>D</sub><sup>24</sup> = +23.8 (*c* = 1.5, CHCl<sub>3</sub>).

Enantiomeric excess (ee = 81%) was determined by high-performance liquid chromatography (HPLC) using a chiral stationary phase (AD-H column, flow rate = 0.8 mL min<sup>-1</sup>, eluent: Hept/*i*-PrOH = 95:5, 254 nm absorbance), retention times: major enantiomer (*t*<sub>R</sub> = 18.08 min), minor enantiomer (*t*<sub>R</sub> = 16.83 min).

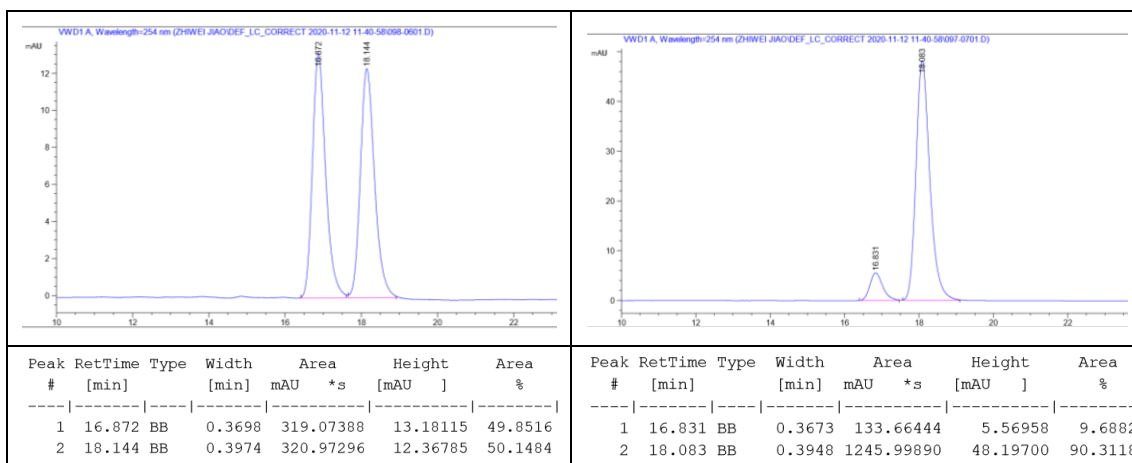

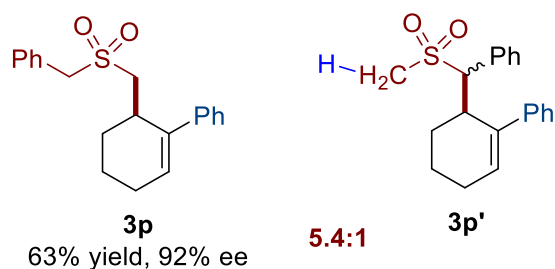

**(*R*)-2-((benzylsulfonyl)methyl)-2,3,4,5-tetrahydro-1,1'-biphenyl**

The reaction was performed on 0.2 mmol scale, ((benzylsulfonyl)methyl)trimethylsilane (73 mg, 0.3 mmol) and 2-fluoro-2,3,4,5-tetrahydro-1,1'-biphenyl (35 mg, 0.2 mmol) were used and **L1** (8.3 mg) was used as the supporting ligand. The product **3p** was obtained by flash silica column chromatography (petroleum ether/EtOAc 80:20) (41 mg, 63% yield) as a white solid.

**<sup>1</sup>H-NMR** (400 MHz, CDCl<sub>3</sub>): δ 7.30-7.26 (m, 8H), 7.17-7.15 (m, 2H), 6.04 (t, d, *J* = 4.0 Hz, 1H), 4.07 (s, 2H), 3.48 (brs, 1H), 2.83-2.78 (m, 2H), 2.19-2.15 (m, 3H), 2.01-1.96 (m, 1H), 1.71-1.67 (m, 1H), 1.55-1.50 (m, 1H).

**<sup>13</sup>C-NMR** (101 MHz, CDCl<sub>3</sub>): δ 140.6, 138.3, 130.7, 129.1, 129.0, 128.9, 128.8, 128.0, 127.4, 126.4, 60.8, 53.3, 30.4, 27.3, 25.8, 17.8.

**IR** (cm<sup>-1</sup>): 1494, 1454, 1302, 1247, 1136, 1116, 781, 760, 698.

**HRMS-ESI** (M+Na)<sup>+</sup>: 349.1238, found: 349.1227.

[α]<sub>D</sub><sup>24</sup> = +151.0 (*c* = 4.6, CHCl<sub>3</sub>).

Enantiomeric excess (ee = 92%) was determined by high-performance liquid chromatography (HPLC) using a chiral stationary phase (AD-H column, flow rate = 0.8 mL min<sup>-1</sup>, eluent: Hept/*i*-PrOH = 98:2, 254 nm absorbance), retention times: major enantiomer (*t*<sub>R</sub> = 14.65 min), minor enantiomer (*t*<sub>R</sub> = 16.25 min).

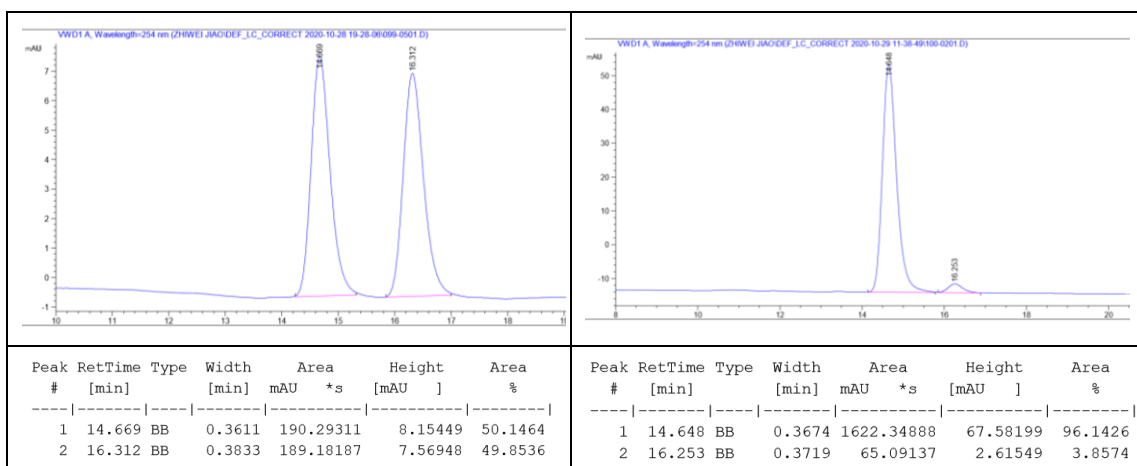

### III. Substrate scope of different allylic acceptors

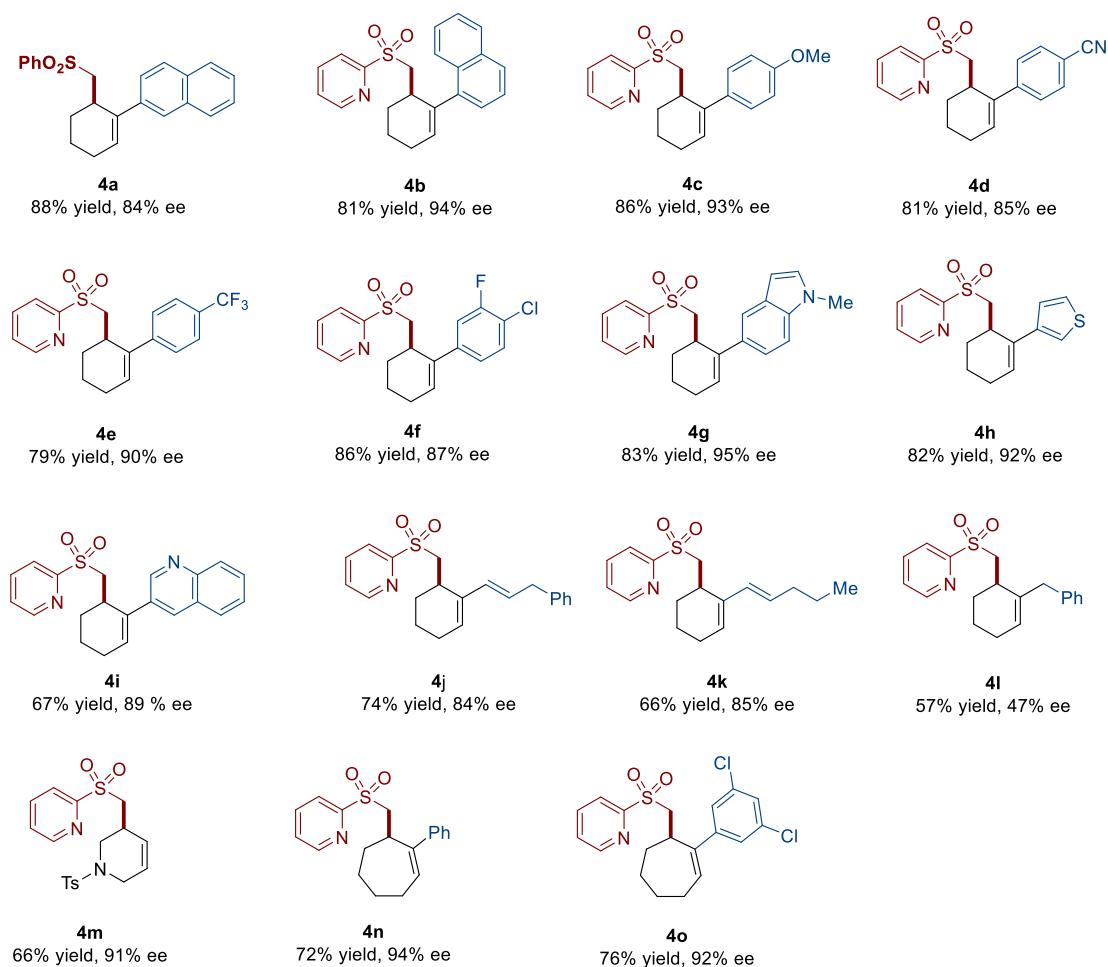

**Figure S-2.** Substrates scope of different allylic acceptors.

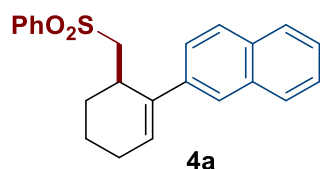

**(R)-2-((benzylsulfonyl)methyl)-2,3,4,5-tetrahydro-1,1'-biphenyl**

The reaction was performed on 0.2 mmol scale, trimethyl((phenylsulfonyl)methyl)silane (68 mg, 0.3 mmol) and 2-(6-fluorocyclohex-1-en-1-yl)naphthalene (45 mg, 0.2 mmol) were used and **L1** (8.3 mg) was used as the supporting ligand. The product **4a** was obtained by flash silica column chromatography (petroleum ether/EtOAc 85:15) (64 mg, 88% yield) as a yellow solid.

<sup>1</sup>H-NMR (400 MHz, CDCl<sub>3</sub>): δ 7.80-7.77 (m, 3H), 7.68-7.62 (m, 3H), 7.50-7.44 (m, 5H), 7.23 (d, *J* = 8.0 Hz, 1H), 6.19 (t, *J* = 4.0 Hz, 1H), 3.42 (brs, 1H), 3.11 (dd, *J* = 16.0, 8.0 Hz, 1H), 3.02 (d, *J* = 16.0 Hz, 1H), 2.39-2.32 (m, 1H), 2.24-2.23 (m, 1H), 2.01-1.92 (m, 1H), 1.79-1.74 (m, 1H), 1.69-1.62 (m, 1H).

<sup>13</sup>C-NMR (101 MHz, CDCl<sub>3</sub>): δ 139.5, 138.0, 137.5, 133.7, 133.4, 132.7, 129.8, 129.4, 128.2, 128.1, 127.6, 126.3, 125.9, 124.6, 124.5, 58.1, 30.9, 26.7, 26.0, 17.8.

IR (cm<sup>-1</sup>): 1596, 1543, 1447, 1303, 1149, 859, 810, 752, 688.

HRMS-ESI (M+Na)<sup>+</sup>: 385.1238, found: 385.1235.

[α]<sub>D</sub><sup>24</sup> = +24.8 (*c* = 1.5, CHCl<sub>3</sub>).

Enantiomeric excess (ee = 84%) was determined by high-performance liquid chromatography (HPLC) using a chiral stationary phase (IB column, flow rate = 0.8 mL min<sup>-1</sup>, eluent: Hept/*i*-PrOH = 95:5, 254 nm absorbance), retention times: major enantiomer (*t*<sub>R</sub> = 12.25 min), minor enantiomer (*t*<sub>R</sub> = 13.34 min).

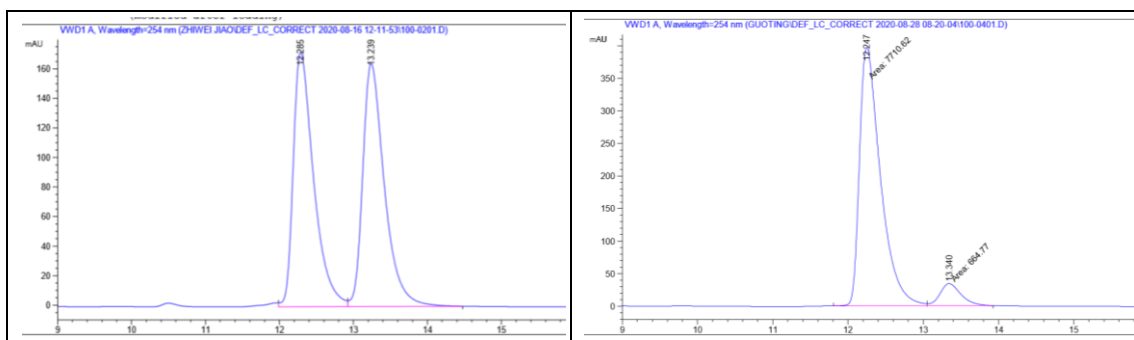

| Peak # | RetTime [min] | Type | Width [min] | Area mAU *s | Height [mAU] | Area %  | Peak # | RetTime [min] | Type | Width [min] | Area mAU *s | Height [mAU] | Area %  |
|--------|---------------|------|-------------|-------------|--------------|---------|--------|---------------|------|-------------|-------------|--------------|---------|
| 1      | 12.285        | VV   | 0.2895      | 3308.65723  | 172.34094    | 49.6402 | 1      | 12.247        | MF   | 0.3230      | 7710.61768  | 397.80652    | 92.0628 |
| 2      | 13.239        | VB   | 0.3079      | 3356.61670  | 164.53307    | 50.3598 | 2      | 13.340        | FM   | 0.3259      | 664.77002   | 34.00153     | 7.9372  |

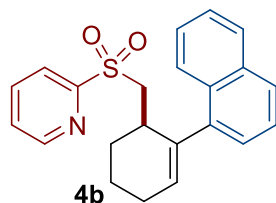

**(R)-2-(((2-(Naphthalen-1-yl)cyclohex-2-en-1-yl)methyl)sulfonyl)pyridine.**

The reaction was performed on 0.2 mmol scale, 2-(((trimethylsilyl)methyl)sulfonyl)pyridine (69 mg, 0.3 mmol) and 1-(6-fluorocyclohex-1-en-1-yl)naphthalene (45 mg, 0.2 mmol) were used and **L1** (8.3 mg) was used as the supporting ligand. The product **4b** was obtained by flash silica column chromatography (petroleum ether/EtOAc 60:40) (59 mg, 81% yield) as a white solid.

<sup>1</sup>H-NMR (400 MHz, CDCl<sub>3</sub>): δ 8.48 (d, *J* = 8.0 Hz, 1H), 8.02 (d, *J* = 8.0 Hz, 1H), 7.86 (t, *J* = 8.0 Hz, 1H), 7.79-7.77 (m, 1H), 7.74-7.71 (m, 2H), 7.62 (s, 1H), 7.46-7.40 (m, 3H), .34 (d, *J* = 8.0 Hz, 1H), 6.18 (t, *J* = 4.0 Hz, 1H), 3.57 (brs, 1H), 3.42 (dd, *J* = 16.0, 12.0 Hz, 1H), 3.33 (d, *J* = 16.0 Hz, 1H), 2.29-2.23 (m, 3H), 2.00-1.92 (m, 1H), 1.75-1.63 (m, 2H).

<sup>13</sup>C-NMR (101 MHz, CDCl<sub>3</sub>): δ 157.6, 150.2, 138.3, 138.1, 137.8, 133.5, 132.7, 129.7, 128.3, 128.2, 127.6, 127.3, 126.2, 125.9, 124.83, 124.82, 122.0, 54.2, 30.7, 27.1, 25.9, 17.6.

IR (cm<sup>-1</sup>): 1578, 1451, 1427, 1306, 1162, 1110, 1081, 859, 809, 748.

HRMS-ESI (M+H)<sup>+</sup>: 364.1371, found: 364.1361.

[α]<sub>D</sub><sup>24</sup> = +47.4 (*c* = 2.5, CHCl<sub>3</sub>).

Enantiomeric excess (ee = 94%) was determined by high-performance liquid chromatography (HPLC) using a chiral stationary phase (IA column, flow rate = 0.8 mL min<sup>-1</sup>, eluent: Hept/*i*-PrOH = 90:10, 254 nm absorbance), retention times: major enantiomer (*t*<sub>R</sub> = 18.41 min), minor enantiomer (*t*<sub>R</sub> = 19.99 min).



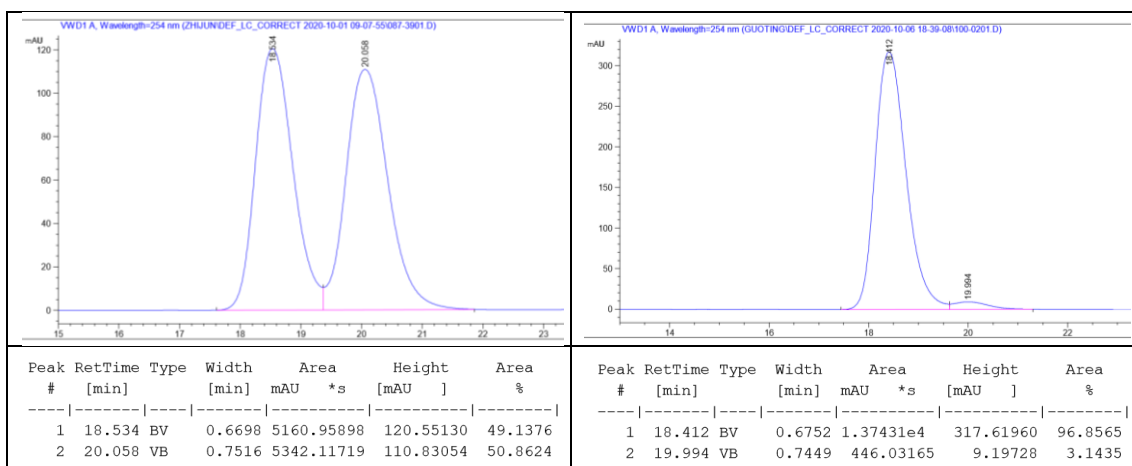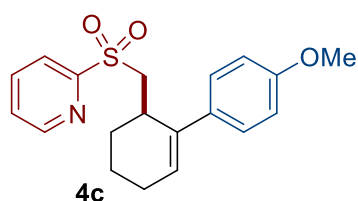

**(R)-2-(((4'-Methoxy-2,3,4,5-tetrahydro-[1,1'-biphenyl]-2-yl)methyl)sulfonyl)pyridine.**

The reaction was performed on 0.2 mmol scale, 2-(((trimethylsilyl)methyl)sulfonyl)pyridine (69 mg, 0.3 mmol) and 2-fluoro-4'-methoxy-2,3,4,5-tetrahydro-1,1'-biphenyl (41 mg, 0.2 mmol) were used and **L1** (8.3 mg) was used as the supporting ligand. The product **4c** was obtained by flash silica column chromatography (petroleum ether/EtOAc 60:40) (59 mg, 86% yield) as a white solid.

<sup>1</sup>H-NMR (400 MHz, CDCl<sub>3</sub>): δ 8.66 (d, *J* = 4.0 Hz, 1H), 8.06 (d, *J* = 8.0 Hz, 1H), 7.94 (t, *J* = 8.0 Hz, 1H), 7.54-7.51 (m, 1H), 7.11 (d, *J* = 8.0 Hz, 1H), 6.77 (d, *J* = 8.0 Hz, 1H), 5.96 (t, *J* = 4.0 Hz, 1H), 3.79 (s, 3H), 3.40 (s, 1H), 3.36 (d, *J* = 12.0 Hz, 1H), 3.26 (d, *J* = 12.0 Hz, 1H), 2.17-2.15 (m, 3H), 1.89-1.82 (m, 1H), 1.70-1.60 (m, 2H).

<sup>13</sup>C-NMR (101 MHz, CDCl<sub>3</sub>): δ 158.9, 157.8, 150.3, 138.2, 137.7, 132.9, 127.7, 127.3, 122.2, 114.0, 55.4, 54.2, 30.7, 27.0, 25.8, 17.6.

IR (cm<sup>-1</sup>): 1606, 1577, 1511, 1453, 1427, 1305, 1285, 1245, 1179, 1162, 1111, 1034, 838, 813, 790, 769, 748.

HRMS-ESI (M+Na)<sup>+</sup>: 366.1140, found: 366.1133.

$[\alpha]_{\text{D}}^{24} = +123.1$  ( $c = 1.0$ ,  $\text{CHCl}_3$ ).

Enantiomeric excess ( $ee = 93\%$ ) was determined by high-performance liquid chromatography (HPLC) using a chiral stationary phase (AD-H column, flow rate =  $0.8 \text{ mL min}^{-1}$ , eluent: Hept/*i*-PrOH = 85:15, 254 nm absorbance), retention times: major enantiomer ( $t_{\text{R}} = 29.66 \text{ min}$ ), minor enantiomer ( $t_{\text{R}} = 30.48 \text{ min}$ ).

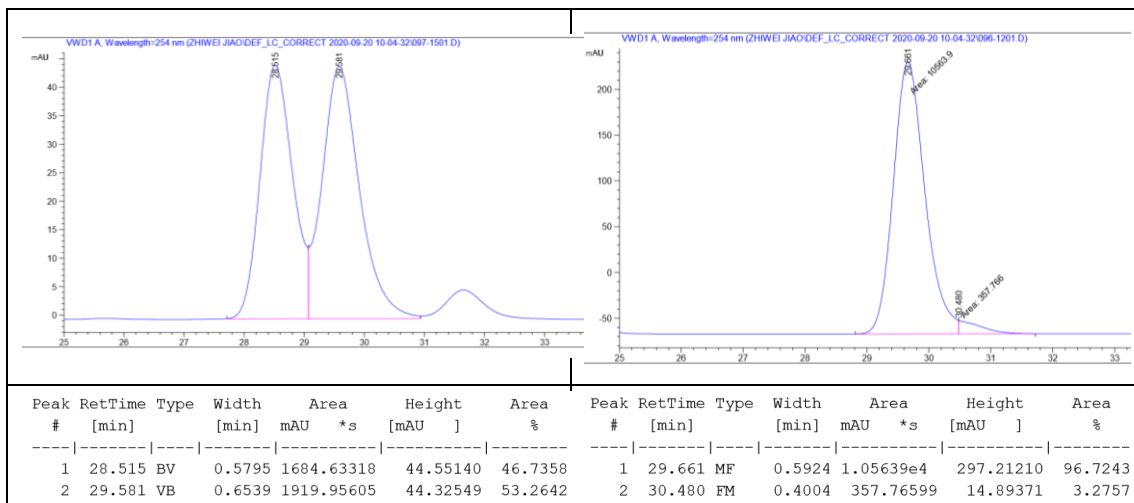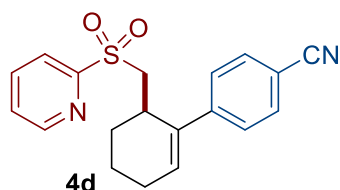

**(*R*)-2'-((Pyridin-2-ylsulfonyl)methyl)-2',3',4',5'-tetrahydro-[1,1'-biphenyl]-4-carbonitrile.**

The reaction was performed on 0.2 mmol scale, 2-(((trimethylsilyl)methyl)sulfonyl)pyridine (69 mg, 0.3 mmol) and 2'-fluoro-2',3',4',5'-tetrahydro-[1,1'-biphenyl]-4-carbonitrile (40 mg, 0.2 mmol) were used and **L1** (8.3 mg) was used as the supporting ligand. The product **4d** was obtained by flash silica column chromatography (petroleum ether/EtOAc 60:40) (55 mg, 81% yield) as a white solid.

$^1\text{H-NMR}$  (400 MHz,  $\text{CDCl}_3$ ):  $\delta$  8.64 (d,  $J = 8.0 \text{ Hz}$ , 1H), 8.06 (d,  $J = 8.0 \text{ Hz}$ , 1H), 7.56-7.53 (m, 1H), 7.54 (d,  $J = 8.0 \text{ Hz}$ , 1H), 7.33 (d,  $J = 8.0 \text{ Hz}$ , 2H), 6.18 (t,  $J = 4.0 \text{ Hz}$ , 1H), 3.48-3.47 (m, 1H), 3.37 (dd,  $J = 16.0, 8.0 \text{ Hz}$ , 1H), 3.17 (d,  $J = 16.0 \text{ Hz}$ , 1H), 2.23-2.15 (m, 3H), 1.94-1.85 (m, 1H), 1.74-1.70 (m, 1H), 1.67-1.60 (m, 1H).

$^{13}\text{C-NMR}$  (101 MHz,  $\text{CDCl}_3$ ):  $\delta$  157.7, 150.3, 144.9, 138.4, 137.1, 132.5, 132.3, 127.5, 126.8, 122.1, 119.0, 110.8, 53.9, 30.1, 27.0, 25.9, 17.4.

$\text{IR}$  ( $\text{cm}^{-1}$ ): 2226, 1603, 1578, 1452, 1427, 1306, 1162, 1111, 991, 846, 814, 761.

$\text{HRMS-ESI}$  ( $\text{M}+\text{H}$ ) $^+$ : 339.1167, found: 339.1162.

$[\alpha]_{\text{D}}^{24} = +79.9$  ( $c = 1.6$ ,  $\text{CHCl}_3$ ).

Enantiomeric excess ( $ee = 85\%$ ) was determined by high-performance liquid chromatography (HPLC) using a chiral stationary phase (AD-H column, flow rate =  $0.8 \text{ mL min}^{-1}$ , eluent: Hept/*i*-PrOH = 80:20, 254 nm absorbance), retention times: major enantiomer ( $t_{\text{R}} = 25.07 \text{ min}$ ), minor enantiomer ( $t_{\text{R}} = 27.27 \text{ min}$ ).

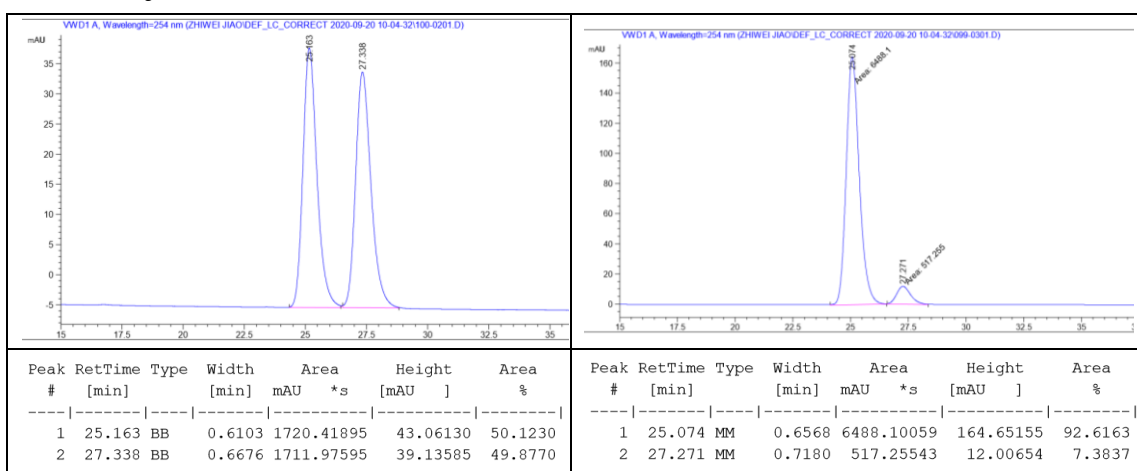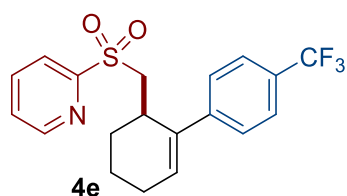

**(*R*)-2-(((4'-(Trifluoromethyl)-2,3,4,5-tetrahydro-[1,1'-biphenyl]-2-yl)methyl)sulfonyl)pyridine.**

The reaction was performed on 0.2 mmol scale, 2-(((trimethylsilyl)methyl)sulfonyl)pyridine (69 mg, 0.3 mmol) and 2-fluoro-4'-(trifluoromethyl)-2,3,4,5-tetrahydro-1,1'-biphenyl (49 mg, 0.2 mmol) were used and **L1** (8.3 mg) was used as the supporting ligand. The product **4e** was obtained by flash silica column chromatography (petroleum ether/EtOAc 80:20) (60 mg, 79% yield) as a colorless oil.

$^1\text{H-NMR}$  (400 MHz,  $\text{CDCl}_3$ ):  $\delta$  8.59 (d,  $J = 4.0 \text{ Hz}$ , 1H), 8.05 (d,  $J = 8.0 \text{ Hz}$ , 1H),

7.94 (td,  $J = 8.0, 4.0$  Hz, 1H), 7.54-7.50 (m, 1H), 7.49 (d,  $J = 8.0$  Hz, 1H), 7.27 (d,  $J = 8.0$  Hz, 2H), 6.11 (t,  $J = 4.0$  Hz, 1H), 3.41 (brs, 1H), 3.36 (dd,  $J = 16.0, 8.0$  Hz, 1H), 3.22 (d,  $J = 16.0$  Hz, 1H), 2.21-2.16 (m, 3H), 1.93-1.87 (m, 1H), 1.74-1.62 (m, 2H).

$^{19}\text{F}$  NMR (376.6 MHz,  $\text{CDCl}_3$ ):  $\delta$  -62.88.

$^{13}\text{C}$ -NMR (101 MHz,  $\text{CDCl}_3$ ):  $\delta$  157.6, 150.3, 144.1, 138.3, 137.4, 131.1, 129.2 (q,  $J = 32.3$  Hz), 127.5, 126.6, 126.6 (overlap), 125.6 (m), 122.2, 54.0, 30.6, 27.0, 25.8, 17.5.

IR ( $\text{cm}^{-1}$ ): 1614, 1579, 1428, 1327, 1164, 1113, 1069, 848.

HRMS-ESI ( $\text{M}+\text{H}^+$ ): 382.1089, found: 382.1086.

$[\alpha]_{\text{D}}^{24} = +85.4$  ( $c = 1.5, \text{CHCl}_3$ ).

Enantiomeric excess (ee = 90%) was determined by high-performance liquid chromatography (HPLC) using a chiral stationary phase (IB column, flow rate =  $0.8 \text{ mL min}^{-1}$ , eluent: Hept/*i*-PrOH = 95:5, 254 nm absorbance), retention times: major enantiomer ( $t_{\text{R}} = 22.94$  min), minor enantiomer ( $t_{\text{R}} = 22.09$  min).

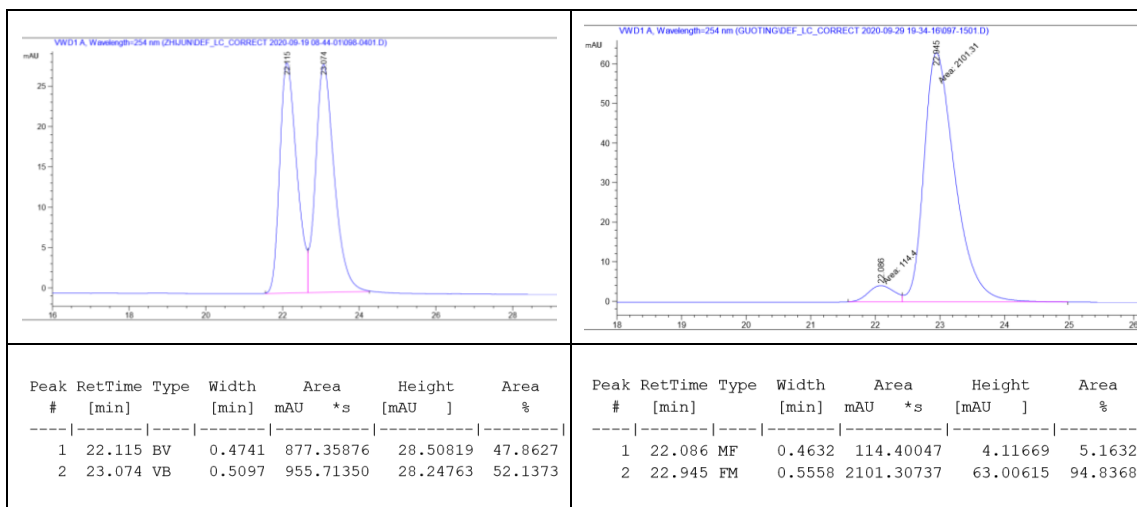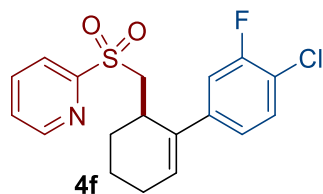

**(*R*)-2-(((4'-Chloro-3'-fluoro-2,3,4,5-tetrahydro-[1,1'-biphenyl]-2-yl)methyl)sulfonyl)pyridine.**

The reaction was performed on 0.2 mmol scale,

2-(((trimethylsilyl)methyl)sulfonyl)pyridine (69 mg, 0.3 mmol) and 4'-chloro-2,3'-difluoro-2,3,4,5-tetrahydro-1,1'-biphenyl (46 mg, 0.2 mmol) were used and **L1** (8.3 mg) was used as the supporting ligand. The product **4f** was obtained by flash silica column chromatography (petroleum ether/EtOAc 80:20) (60 mg, 82% yield) as a yellow oil.

**<sup>1</sup>H-NMR** (400 MHz, CDCl<sub>3</sub>): δ 8.65 (d, *J* = 4.0 Hz, 1H), 8.06 (d, *J* = 8.0 Hz, 1H), 7.96 (td, *J* = 8.0, 4.0 Hz, 1H), 7.56-7.53 (m, 1H), 7.27-7.23 (m, 1H), 6.94 (d, *J* = 8.0 Hz, 1H), 6.86 (dd, *J* = 8.0, 4.0 Hz, 1H), 6.08 (t, *J* = 4.0 Hz, 1H), 3.34-3.23 (m, 3H), 2.23-2.18 (m, 3H), 1.89-1.83 (m, 1H), 1.73-1.56 (m, *J* = 4.0 Hz, 2H).

**<sup>19</sup>F NMR** (376.6 MHz, CDCl<sub>3</sub>): δ -115.6.,

**<sup>13</sup>C-NMR** (101 MHz, CDCl<sub>3</sub>): δ 159.3, 157.1 (d, *J* = 65.6 Hz), 150.4, 141.2 (d, *J* = 6.1 Hz), 138.3, 136.6 (d, *J* = 2.0 Hz), 130.6 (d, *J* = 4.0 Hz), 127.5, 122.7 (d, *J* = 4.0 Hz), 122.2, 119.6 (d, *J* = 17.2 Hz), 114.3 (d, *J* = 22.2 Hz), 54.0, 30.6, 26.8, 25.8, 17.3.

**IR** (cm<sup>-1</sup>): 1569, 1489, 1452, 1427, 1307, 1248, 1182, 1162, 1111, 1061, 991, 855, 807, 748.

**HRMS-ESI** (M+H)<sup>+</sup>: 366.0731, found: 366.0723.

[α]<sub>D</sub><sup>24</sup> = +81.3 (*c* = 2.8, CHCl<sub>3</sub>).

Enantiomeric excess (ee = 88%) was determined by high-performance liquid chromatography (HPLC) using a chiral stationary phase (IB column, flow rate = 0.8 mL min<sup>-1</sup>, eluent: Hept/*i*-PrOH = 90:10, 254 nm absorbance), retention times: major enantiomer (*t*<sub>R</sub> = 17.09 min), minor enantiomer (*t*<sub>R</sub> = 16.35 min).

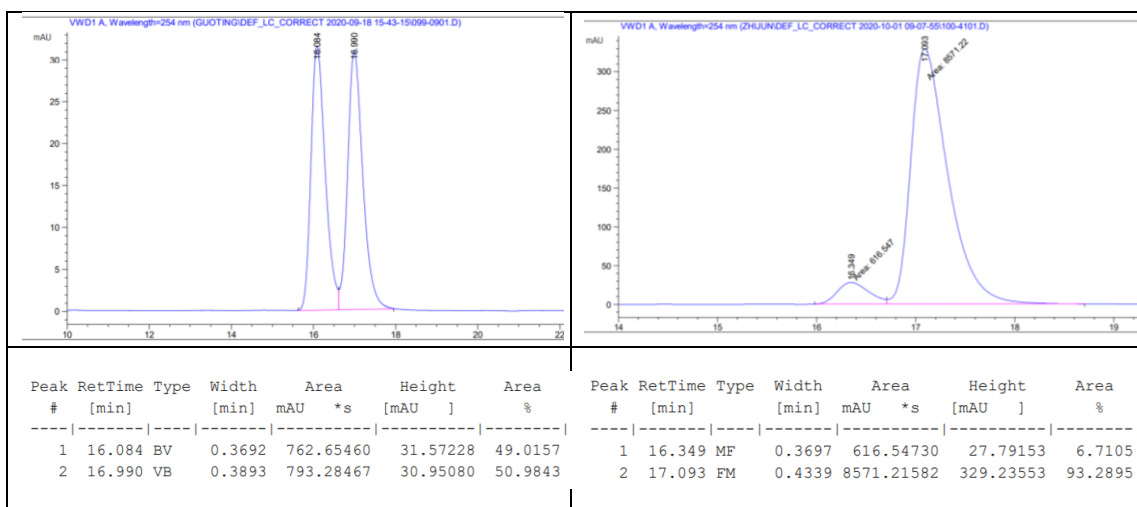

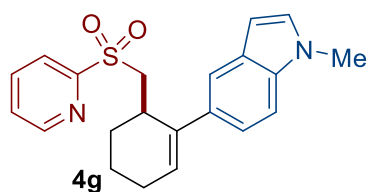

**(R)-2-(((4'-Chloro-3'-fluoro-2,3,4,5-tetrahydro-[1,1'-biphenyl]-2-yl)methyl)sulfonyl)pyridine.**

The reaction was performed on 0.2 mmol scale, 2-(((trimethylsilyl)methyl)sulfonyl)pyridine (69 mg, 0.3 mmol) and 5-(6-fluorocyclohex-1-en-1-yl)-1-methyl-1*H*-indole (46 mg, 0.2 mmol) were used and **L1** (8.3 mg) was used as the supporting ligand. The product **4g** was obtained by flash silica column chromatography (petroleum ether/EtOAc 50:50) (61 mg, 83% yield) as a white solid.

<sup>1</sup>**H-NMR** (400 MHz, CDCl<sub>3</sub>): δ 8.65 (d, *J* = 4.0 Hz, 1H), 8.06 (d, *J* = 8.0 Hz, 1H), 7.96 (td, *J* = 8.0, 4.0 Hz, 1H), 7.56-7.53 (m, 1H), 7.27-7.23 (m, 1H), 6.94 (d, *J* = 8.0 Hz, 1H), 6.86 (dd, *J* = 8.0, 4.0 Hz, 1H), 6.08 (t, *J* = 4.0 Hz, 1H), 3.34-3.23 (m, 3H), 2.23-2.18 (m, 3H), 1.89-1.83 (m, 1H), 1.73-1.56 (m, *J* = 4.0 Hz, 2H).

<sup>13</sup>**C-NMR** (101 MHz, CDCl<sub>3</sub>): δ 157.7, 150.2, 139.2, 138.1, 136.2, 132.1, 129.3, 128.6, 127.6, 127.2, 122.1, 120.7, 118.5, 109.3, 101.3, 54.4, 33.0, 31.4, 27.1, 25.9, 17.8.

**IR** (cm<sup>-1</sup>): 1579, 1512, 1489, 1427, 1305, 1249, 1161, 1110, 992, 756.

**HRMS-ESI** (M+Na)<sup>+</sup>: 389.1300, found: 389.1295.

[α]<sub>D</sub><sup>24</sup> = +56.7 (*c* = 1.7, CHCl<sub>3</sub>).

Enantiomeric excess (ee = 95%) was determined by high-performance liquid chromatography (HPLC) using a chiral stationary phase (IB column, flow rate = 0.8 mL min<sup>-1</sup>, eluent: Hept/*i*-PrOH = 80:20, 254 nm absorbance), retention times: major enantiomer (*t*<sub>R</sub> = 18.84 min), minor enantiomer (*t*<sub>R</sub> = 20.79 min).

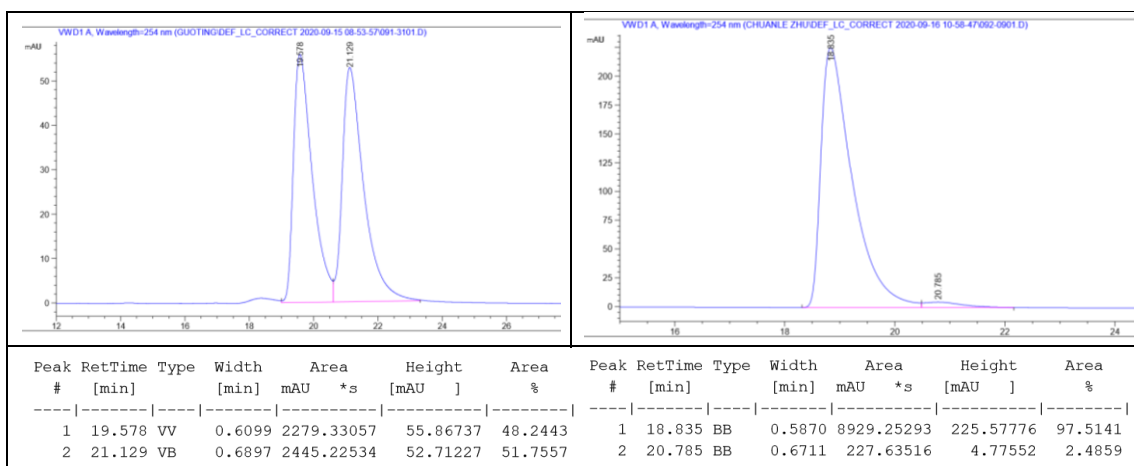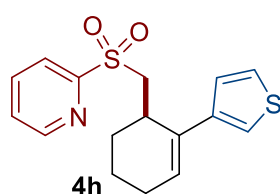

**(R)-2-(((2-(Thiophen-3-yl)cyclohex-2-en-1-yl)methyl)sulfonyl)pyridine.**

The reaction was performed on 0.2 mmol scale, 2-(((trimethylsilyl)methyl)sulfonyl)pyridine (69 mg, 0.3 mmol) and 3-(6-fluorocyclohex-1-en-1-yl)thiophene (36 mg, 0.2 mmol) were used and **L1** (8.3 mg) was used as the supporting ligand. The product **4h** was obtained by flash silica column chromatography (petroleum ether/EtOAc 80:20) (52 mg, 82% yield) as a brown solid.

<sup>1</sup>H-NMR (400 MHz, CDCl<sub>3</sub>): δ 8.71 (d, *J* = 8.0 Hz, 1H), 8.10 (d, *J* = 8.0 Hz, 1H), 7.96 (td, *J* = 8.0, 4.0 Hz, 1H), 7.56-7.53 (m, 1H), 7.23-7.21 (m, 1H), 7.15-7.14 (m, 1H), 7.09 (dd, *J* = 8.0, 4.0 Hz, 1H), 6.19 (t, *J* = 4.0 Hz, 1H), 3.53-3.38 (m, 3H), 2.21-2.15 (m, 3H), 1.80-1.76 (m, 1H), 1.69-1.60 (m, 2H).

<sup>13</sup>C-NMR (101 MHz, CDCl<sub>3</sub>): δ 157.9, 150.4, 141.4, 138.3, 133.1, 127.5, 127.4, 125.9, 125.4, 122.1, 119.3, 54.1, 30.4, 26.5, 25.5, 17.2.

IR (cm<sup>-1</sup>): 1578, 1452, 1427, 1329, 1304, 1246, 1162, 1111, 1081, 991, 851, 780, 763, 653.

HRMS-ESI (M+Na)<sup>+</sup>: 342.0598, found: 342.0596.

[α]<sub>D</sub><sup>24</sup> = +105.8 (*c* = 2.2, CHCl<sub>3</sub>).

Enantiomeric excess (ee = 91%) was determined by high-performance liquid

chromatography (HPLC) using a chiral stationary phase (IB column, flow rate = 0.8 mL min<sup>-1</sup>, eluent: Hept/*i*-PrOH = 90:10, 254 nm absorbance), retention times: major enantiomer ( $t_R = 19.14$  min), minor enantiomer ( $t_R = 17.93$  min).

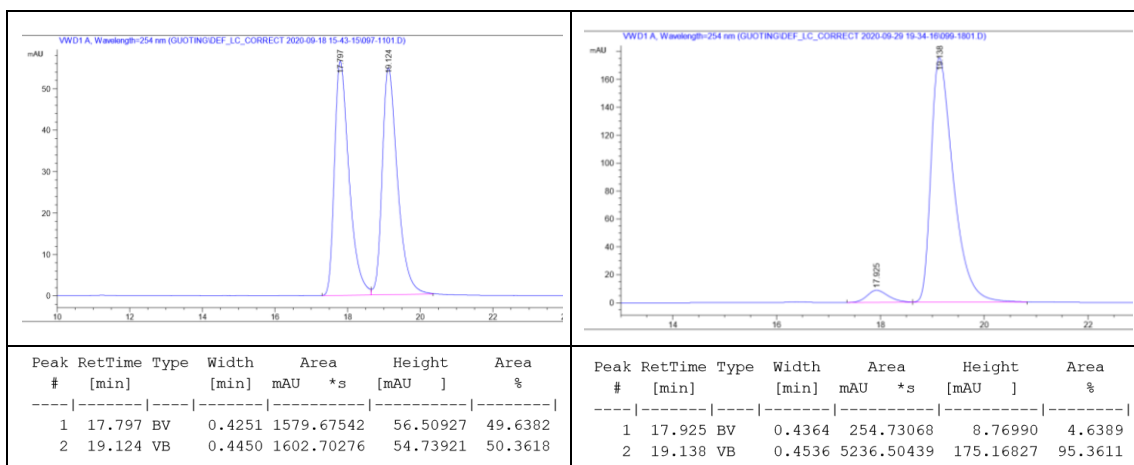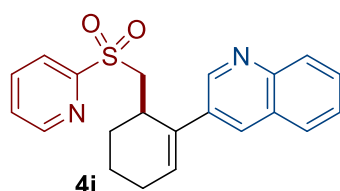

**(*R*)-3-(6-((Pyridin-2-ylsulfonyl)methyl)cyclohex-1-en-1-yl)quinoline.**

The reaction was performed on 0.2 mmol scale, 2-(((trimethylsilyl)methyl)sulfonyl)pyridine (69 mg, 0.3 mmol) and 3-(6-fluorocyclohex-1-en-1-yl)quinoline (45 mg, 0.2 mmol) were used and **L1** (8.3 mg) was used as the supporting ligand. The product **4i** was obtained by flash silica column chromatography (petroleum ether/EtOAc 50:50) (48 mg, 66% yield) as a pale yellow oil.

<sup>1</sup>H-NMR (400 MHz, CDCl<sub>3</sub>): δ 8.77 (d, *J* = 4.0 Hz, 1H), 8.47 (d, *J* = 4.0 Hz, 1H), 8.06 (d, *J* = 8.0 Hz, 1H), 8.02 (d, *J* = 8.0 Hz, 1H), 7.95 (d, *J* = 8.0 Hz, 1H), 7.88 (t, 7.75 (d, *J* = 8.0 Hz, 1H), 7.68 (t, *J* = 8.0 Hz, 1H), 7.54 (t, *J* = 8.0 Hz, 1H), 7.44 (td, *J* = 8.0, 4.0 Hz, 1H), 6.25 (t, *J* = 4.0 Hz, 1H), 3.54 (brs, 1H), 3.45-3.31 (m, 1H), 2.32-2.25 (m, 3H), 1.99-1.92 (m, 1H), 1.79-1.67 (m, 2H).

<sup>13</sup>C-NMR (101 MHz, CDCl<sub>3</sub>): δ 150.3, 149.7, 138.2, 135.6, 132.9, 132.2, 131.5, 129.4, 129.2, 128.2, 127.9, 127.5, 127.0, 122.0, 53.9, 30.5, 27.0, 26.0, 17.3.

IR (cm<sup>-1</sup>): 2926, 1492, 1452, 1427, 1306, 1258, 1162, 1111, 1082, 1022, 991, 973,



908, 849, 788, 754, 698, 664.

**HRMS-ESI (M+H)<sup>+</sup>**: 365.1324, found: 365.1317.

$[\alpha]_D^{24} = +5.9$  ( $c = 1.7$ , CHCl<sub>3</sub>).

Enantiomeric excess (ee = 89%) was determined by high-performance liquid chromatography (HPLC) using a chiral stationary phase (AD-H column, flow rate = 0.8 mL min<sup>-1</sup>, eluent: Hept/*i*-PrOH = 85:15, 254 nm absorbance), retention times: major enantiomer ( $t_R = 35.84$  min), minor enantiomer ( $t_R = 21.80$  min).

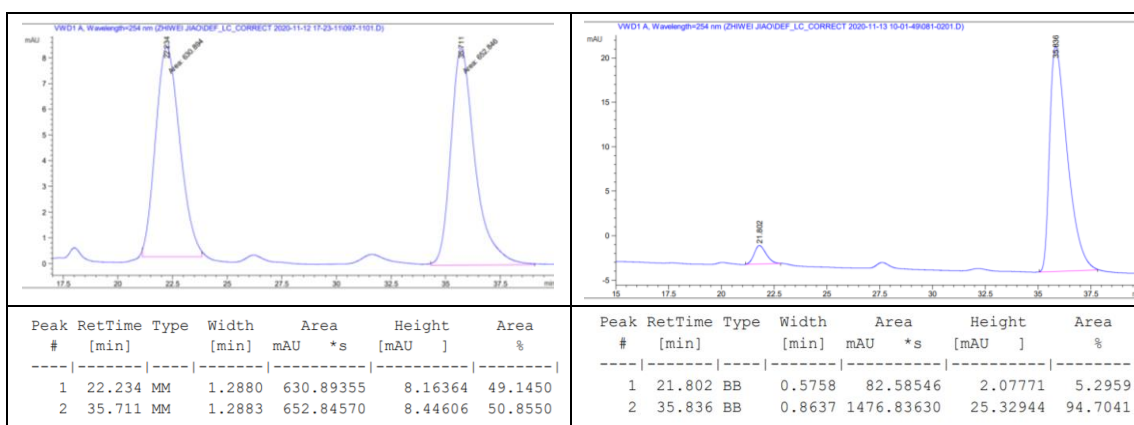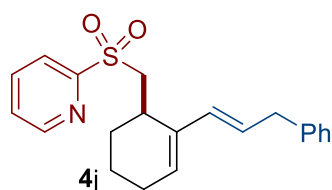

**(*R,E*)-2-(((2-(3-Phenylprop-1-en-1-yl)cyclohex-2-en-1-yl)methyl)sulfonyl)pyridine**

The reaction was performed on 0.2 mmol scale, 2-(((trimethylsilyl)methyl)sulfonyl)pyridine (69 mg, 0.3 mmol) and (*E*)-(3-(6-fluorocyclohex-1-en-1-yl)allyl)benzene (43 mg, 0.2 mmol) were used and **L1** (8.3 mg) was used as the supporting ligand. The product **4j** was obtained by flash silica column chromatography (petroleum ether/EtOAc 80:20) (52 mg, 74% yield) as a colorless oil.

**<sup>1</sup>H-NMR** (400 MHz, CDCl<sub>3</sub>): δ 8.58 (d,  $J = 8.0$  Hz, 1H), 8.02 (d,  $J = 8.0$  Hz, 1H), 7.88 (td,  $J = 8.0, 4.0$  Hz, 1H), 7.46-7.43 (m, 1H), 7.29-7.25 (m, 2H), 7.21-7.17 (m, 1H), 7.15-7.13 (m, 2H), 5.89 (d,  $J = 16.0$  Hz, 1H), 5.73 (t,  $J = 4.0$  Hz, 1H), 5.66-5.59 (m, 2H), 3.52 (d,  $J = 12.0$  Hz, 1H), 3.42 (d,  $J = 12.0, 8.0$  Hz, 1H), 3.36 (d,  $J = 8.0$  Hz,

2H), 3.15 (d,  $J = 12.0$  Hz, 1H), 2.16-2.12 (m, 3H), 1.66-1.55 (m, 3H).

$^{13}\text{C-NMR}$  (101 MHz,  $\text{CDCl}_3$ ):  $\delta$  157.8, 150.3, 140.6, 138.2, 136.0, 132.3, 130.9, 128.7, 128.5, 127.4, 126.1, 122.3, 54.0, 39.3, 28.0, 25.7, 25.5, 17.1.

**IR** ( $\text{cm}^{-1}$ ): 1658, 1639, 1580, 1550, 1511, 1494, 1452, 1428, 1407, 1307, 1163, 1111, 991, 853, 756, 701.

**HRMS-ESI** ( $\text{M}+\text{Na}$ ) $^+$ : 376.1525, found: 376.1531.

$[\alpha]_{\text{D}}^{24} = +39.1$  ( $c = 3.6$ ,  $\text{CHCl}_3$ ).

Enantiomeric excess ( $ee = 84\%$ ) was determined by high-performance liquid chromatography (HPLC) using a chiral stationary phase (IB column, flow rate =  $0.8 \text{ mL min}^{-1}$ , eluent: Hept/*i*-PrOH = 90:10, 254 nm absorbance), retention times: major enantiomer ( $t_{\text{R}} = 15.62$  min), minor enantiomer ( $t_{\text{R}} = 14.46$  min).

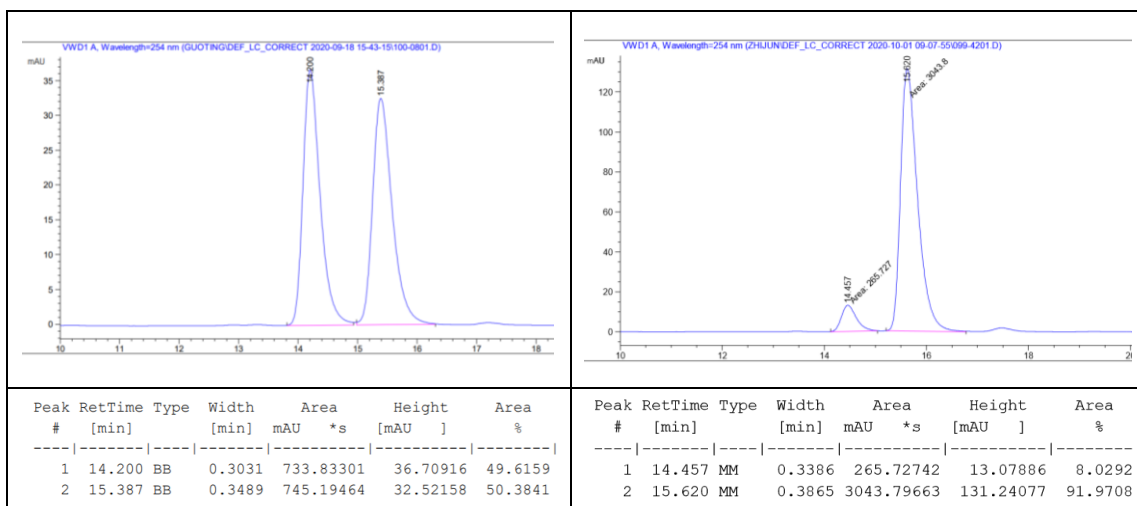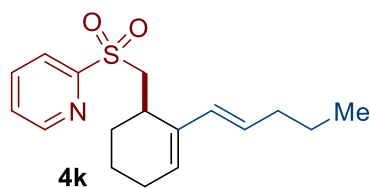

**(*R,E*)-2-(((2-(Pent-1-en-1-yl)cyclohex-2-en-1-yl)methyl)sulfonyl)pyridine.**

The reaction was performed on 0.2 mmol scale, 2-(((trimethylsilyl)methyl)sulfonyl)pyridine (69 mg, 0.3 mmol) and (*E*)-6-fluoro-1-(pent-1-en-1-yl)cyclohex-1-ene (34 mg, 0.2 mmol) were used and **L1** (8.3 mg) was used as the supporting ligand. The product **4k** was obtained by flash silica column chromatography (petroleum ether/EtOAc 80:20) (40 mg, 66% yield) as

a colorless oil.

$^1\text{H-NMR}$  (400 MHz,  $\text{CDCl}_3$ ):  $\delta$  8.75 (d,  $J = 4.0$  Hz, 1H), 8.12 (d,  $J = 8.0$  Hz, 1H), 7.97 (t,  $J = 8.0$  Hz, 1H), 7.57-7.53 (m, 1H), 5.81 (d,  $J = 16.0$  Hz, 1H), 5.67 (t,  $J = 4.0$  Hz, 1H), 5.58-5.51 (m, 1H), 3.53-3.40 (m, 2H), 3.16 (d,  $J = 8.0$  Hz, 1H), 2.09 (brs, 1H), 2.06-1.97 (m, 2H), 1.65-1.55 (m, 3H), 1.40-1.31 (m, 2H), 0.87 (t,  $J = 8.0$  Hz, 3H).

$^{13}\text{C-NMR}$  (101 MHz,  $\text{CDCl}_3$ ):  $\delta$  158.1, 150.3, 138.3, 136.2, 131.0, 129.7, 128.0, 127.4, 122.2, 53.9, 35.1, 27.9, 25.8, 25.4, 22.7, 17.2, 13.8.

$\text{IR}$  ( $\text{cm}^{-1}$ ): 1578, 1453, 1427, 1307, 1163, 1111, 990, 971, 783, 757, 618.

$\text{HRMS-ESI}$  ( $\text{M}+\text{Na}$ ) $^+$ : 328.1347, found: 328.1340.

$[\alpha]_{\text{D}}^{24} = +59.6$  ( $c = 3.5$ ,  $\text{CHCl}_3$ ).

Enantiomeric excess (ee = 85%) was determined by high-performance liquid chromatography (HPLC) using a chiral stationary phase (AD-H column, flow rate =  $0.8 \text{ mL min}^{-1}$ , eluent: Hept/*i*-PrOH = 90:10, 254 nm absorbance), retention times: major enantiomer ( $t_{\text{R}} = 9.80$  min), minor enantiomer ( $t_{\text{R}} = 10.57$  min).

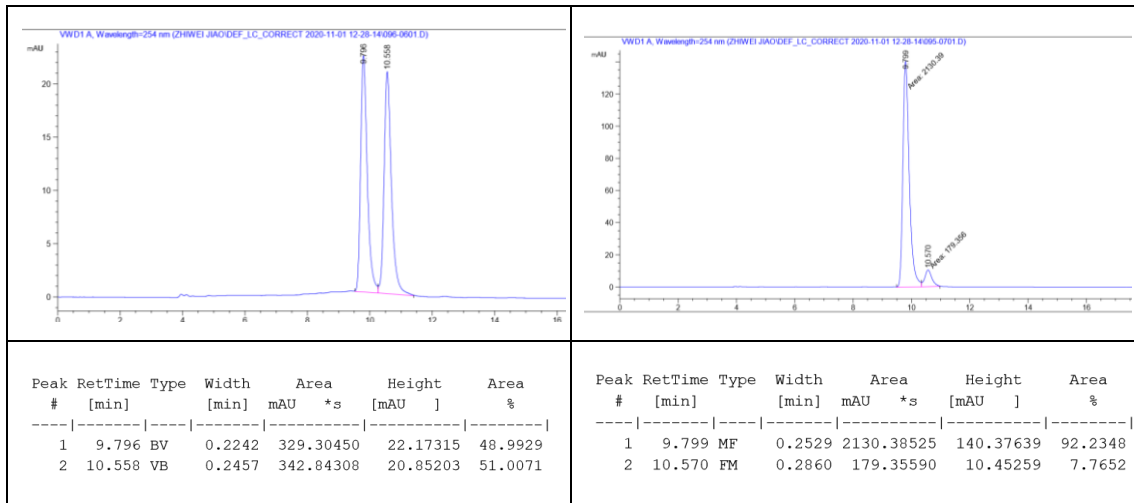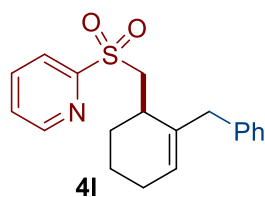

**(R)-2-(((2-Benzylcyclohex-2-en-1-yl)methyl)sulfonyl)pyridine.**

The reaction was performed on 0.2 mmol scale,

2-(((trimethylsilyl)methyl)sulfonyl)pyridine (69 mg, 0.3 mmol) and ((6-fluorocyclohex-1-en-1-yl)methyl)benzene (38 mg, 0.2 mmol) were used and **L1** (8.3 mg) was used as the supporting ligand. The product **4I** was obtained by flash silica column chromatography (petroleum ether/EtOAc 80:20) (37 mg, 57% yield) as a pale yellow oil.

**<sup>1</sup>H-NMR** (400 MHz, CDCl<sub>3</sub>): δ 8.74 (d, *J* = 4.0 Hz, 1H), 8.05 (d, *J* = 8.0 Hz, 1H), 7.92 (td, *J* = 8.0, 4.0 Hz, 1H), 7.54-7.51 (m, 1H), 7.23-7.14 (m, 3H), 7.03 (d, *J* = 8.0 Hz, 2H), 5.51 (s, 1H), 3.60 (d, *J* = 16.0 Hz, 1H), 3.36 (dd, *J* = 16.0, 12.0 Hz, 1H), 3.27 (d, *J* = 16.0 Hz, 1H), 3.14 (d, *J* = 8.0 Hz, 1H), 3.55 (d, *J* = 8.0 Hz, 1H), 2.04-1.95 (m, 3H), 1.60-1.52 (m, 2H).

**<sup>13</sup>C-NMR** (101 MHz, CDCl<sub>3</sub>): δ 157.6, 150.3, 139.5, 138.2, 136.9, 128.9, 128.3, 127.4, 127.2, 126.1, 122.3, 53.8, 41.6, 31.0, 26.8, 25.1, 17.3.

**IR** (cm<sup>-1</sup>): 1578, 1452, 1428, 1306, 1163, 1110, 991, 65, 747, 701.

**HRMS-ESI** (M+Na)<sup>+</sup>: 350.1191, found: 350.1183.

[α]<sub>D</sub><sup>24</sup> = +21.3 (*c* = 3.2, CHCl<sub>3</sub>).

Enantiomeric excess (ee = 47%) was determined by high-performance liquid chromatography (HPLC) using a chiral stationary phase (AD-H column, flow rate = 0.8 mL min<sup>-1</sup>, eluent: Hept/*i*-PrOH = 90:10, 254 nm absorbance), retention times: major enantiomer (*t*<sub>R</sub> = 19.66 min), minor enantiomer (*t*<sub>R</sub> = 17.96 min).

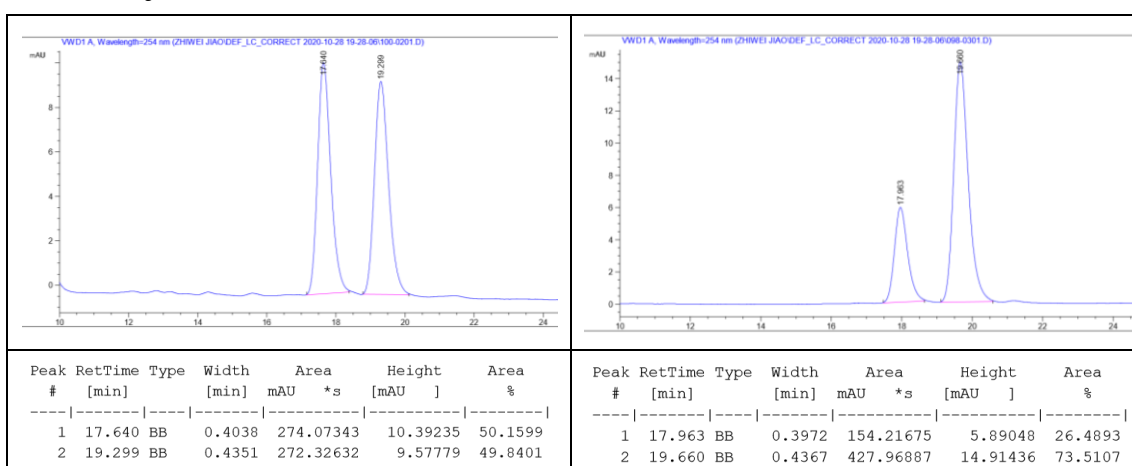

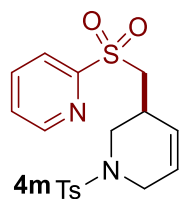

**(S)-2-(((1-Tosyl-1,2,3,6-tetrahydropyridin-3-yl)methyl)sulfonyl)pyridine.**

The reaction was performed on 0.2 mmol scale, 2-(((trimethylsilyl)methyl)sulfonyl)pyridine (69 mg, 0.3 mmol) and 3-fluoro-1-tosyl-1,2,3,6-tetrahydropyridine (51 mg, 0.2 mmol) were used and **L1** (8.3 mg) was used as the supporting ligand. The product **4m** was obtained by flash silica column chromatography (petroleum ether/EtOAc 50:50) (52 mg, 66% yield) as a colorless oil.

**<sup>1</sup>H-NMR** (400 MHz, CDCl<sub>3</sub>): δ 8.76 (d, *J* = 4.0 Hz, 1H), 8.12 (d, *J* = 8.0 Hz, 1H), 7.99 (d, *J* = 8.0 Hz, 1H), 7.63 (d, *J* = 8.0 Hz, 2H), 7.59-7.57 (m, 1H), 7.31 (d, *J* = 8.0 Hz, 2H), 5.85-5.82 (m, 1H), 5.72-5.70 (m, 1H), 3.72 (d, *J* = 16.0 Hz, 1H), 3.57-3.46 (m, 2H), 3.42-3.32 (m, 2H), 3.04-3.01 (m, 2H), 2.43 (s, 3H).

**<sup>13</sup>C-NMR** (101 MHz, CDCl<sub>3</sub>): δ 157.6, 150.4, 144.0, 138.5, 133.1, 129.9, 127.8, 127.7, 127.0, 124.8, 122.2, 54.7, 47.2, 44.9, 30.3, 21.7.

**IR** (cm<sup>-1</sup>): 1428, 1348, 1307, 1165, 1110, 976, 818, 759, 713, 696.

**HRMS-ESI** (M+H)<sup>+</sup>: 393.0943, found: 393.0935.

[α]<sub>D</sub><sup>24</sup> = +99.4 (*c* = 1.4, CHCl<sub>3</sub>).

Enantiomeric excess (ee = 91%) was determined by high-performance liquid chromatography (HPLC) using a chiral stationary phase (IB column, flow rate = 0.8 mL min<sup>-1</sup>, eluent: Hept/*i*-PrOH = 80:20, 254 nm absorbance), retention times: major enantiomer (*t*<sub>R</sub> = 49.61 min), minor enantiomer (*t*<sub>R</sub> = 47.87 min).

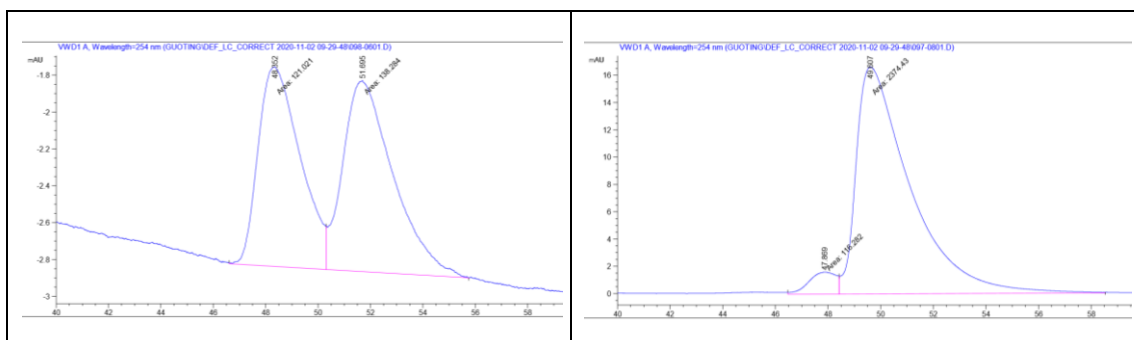

| Peak # | RetTime [min] | Type | Width [min] | Area mAU *s | Height [mAU] | Area %  | Peak # | RetTime [min] | Type | Width [min] | Area mAU *s | Height [mAU] | Area %  |
|--------|---------------|------|-------------|-------------|--------------|---------|--------|---------------|------|-------------|-------------|--------------|---------|
| 1      | 48.352        | MF   | 1.8627      | 121.02113   | 1.08282      | 46.6712 | 1      | 47.869        | MF   | 1.2057      | 116.28219   | 1.60736      | 4.6686  |
| 2      | 51.695        | FM   | 2.2251      | 138.28441   | 1.03578      | 53.3288 | 2      | 49.607        | FM   | 2.3786      | 2374.42944  | 16.63745     | 95.3314 |

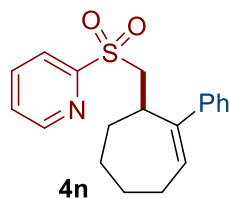

**(R)-2-(((2-Phenylcyclohept-2-en-1-yl)methyl)sulfonyl)pyridine.**

The reaction was performed on 0.2 mmol scale, 2-(((trimethylsilyl)methyl)sulfonyl)pyridine (69 mg, 0.3 mmol) and 7-fluoro-1-phenylcyclohept-1-ene (38 mg, 0.2 mmol) were used and **L1** (8.3 mg) was used as the supporting ligand. The product **4n** was obtained by flash silica column chromatography (petroleum ether/EtOAc 75:25) (47 mg, 72% yield) as a pale yellow solid.

<sup>1</sup>H-NMR (400 MHz, CDCl<sub>3</sub>): δ 8.63 (d, *J* = 8.0 Hz, 1H), 7.94 (d, *J* = 8.0 Hz, 1H), 7.86 (td, *J* = 8.0, 4.0 Hz, 1H), 7.49-7.45 (m, 1H), 7.21-7.18 (m, 3H), 7.16-7.14 (m, 2H), 5.96 (t, *J* = 8.0 Hz, 1H), 3.82 (dd, *J* = 16.0, 12.0 Hz, 1H), 3.62 (dd, *J* = 16.0, 4.0 Hz, 1H), 3.51-3.47 (m, 1H), 2.34-2.24 (m, 2H), 2.15-2.10 (m, 1H), 1.94-1.81 (m, 3H), 1.78-1.73 (m, 1H), 1.51-1.41 (m, 1H).

<sup>13</sup>C-NMR (101 MHz, CDCl<sub>3</sub>): δ 157.5, 150.2, 145.0, 143.7, 138.1, 132.4, 128.3, 127.3, 126.9, 126.4, 122.2, 52.5, 37.6, 29.7, 27.9, 26.9, 25.7.

IR (cm<sup>-1</sup>): 1578, 1447, 1427, 1309, 1162, 1110, 757, 700.

HRMS-ESI (M+Na)<sup>+</sup>: 350.1911, found: 350.1200.

[α]<sub>D</sub><sup>24</sup> = +29.8 (*c* = 1.7, CHCl<sub>3</sub>).

Enantiomeric excess (ee = 94%) was determined by high-performance liquid chromatography (HPLC) using a chiral stationary phase (AD-H column, flow rate = 0.8 mL min<sup>-1</sup>, eluent: Hept/*i*-PrOH = 85:15, 254 nm absorbance), retention times: major enantiomer (*t*<sub>R</sub> = 15.98 min), minor enantiomer (*t*<sub>R</sub> = 15.05 min).

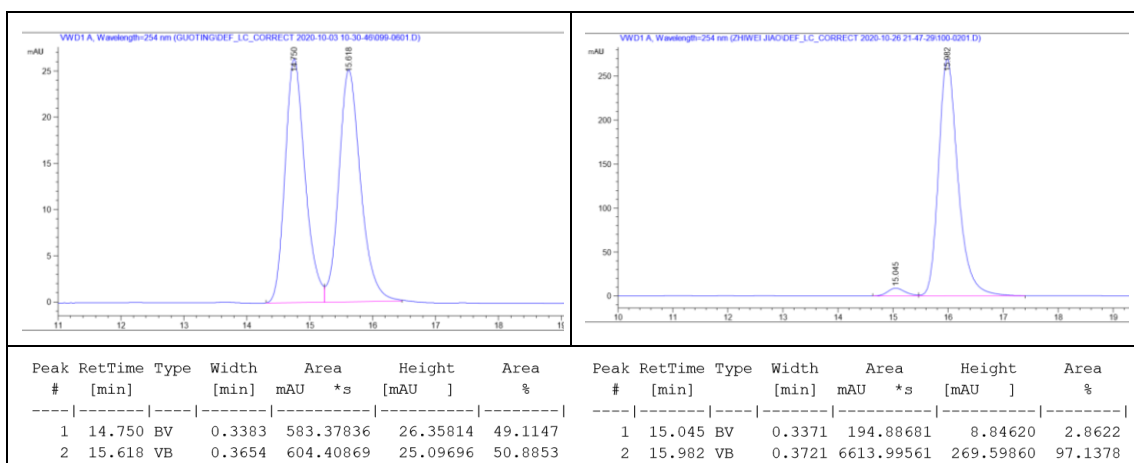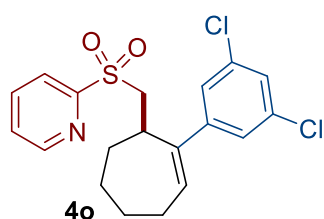

**(R)-2-(((2-(3,5-Dichlorophenyl)cyclohept-2-en-1-yl)methyl)sulfonyl)pyridine**

The reaction was performed on 0.2 mmol scale, 2-(((trimethylsilyl)methyl)sulfonyl)pyridine (69 mg, 0.3 mmol) and 1-(3,5-dichlorophenyl)-7-fluorocyclohept-1-ene (49 mg, 0.2 mmol) were used and **L1** (8.3 mg) was used as the supporting ligand. The product **4o** was obtained by flash silica column chromatography (petroleum ether/EtOAc 80:20) (60 mg, 76% yield) as a pale yellow oil.

<sup>1</sup>H-NMR (400 MHz, CDCl<sub>3</sub>): δ 8.66 (d, *J* = 4.0 Hz, 1H), 7.95 (d, *J* = 8.0 Hz, 1H), 7.89 (td, *J* = 8.0, 4.0 Hz, 1H), 7.52-7.49 (m, 1H), 7.16 (t, *J* = 4.0 Hz, 1H), 6.97 (d, *J* = 4.0 Hz, 2H), 5.97 (t, *J* = 8.0 Hz, 1H), 3.32 (d, *J* = 8.0 Hz, 1H), 3.27-3.23 (m, 1H), 2.36-2.23 (m, 2H), 2.21-2.11 (m, 1H), 1.94-1.87 (m, 2H), 1.83-1.76 (m, 2H), 1.48-1.38 (m, 1H).

<sup>13</sup>C-NMR (101 MHz, CDCl<sub>3</sub>): δ 157.0, 150.3, 146.9, 143.0, 138.1, 134.74, 134.67, 127.5, 126.8, 125.1, 122.2, 52.3, 37.6, 29.8, 27.9, 26.7, 25.6.

IR (cm<sup>-1</sup>): 1580, 1557, 1450, 1427, 1313, 1162, 1110, 855, 797, 757, 687.

HRMS-ESI (M+H)<sup>+</sup>: 396.0592, found: 396.0583.

[α]<sub>D</sub><sup>24</sup> = +29.4 (*c* = 1.4, CHCl<sub>3</sub>).

Enantiomeric excess (ee = 92%) was determined by high-performance liquid chromatography (HPLC) using a chiral stationary phase (IB column, flow rate = 0.8 mL min<sup>-1</sup>, eluent: Hept/*i*-PrOH = 95:5, 254 nm absorbance), retention times: major enantiomer (*t*<sub>R</sub> = 19.78 min), minor enantiomer (*t*<sub>R</sub> = 21.00 min).

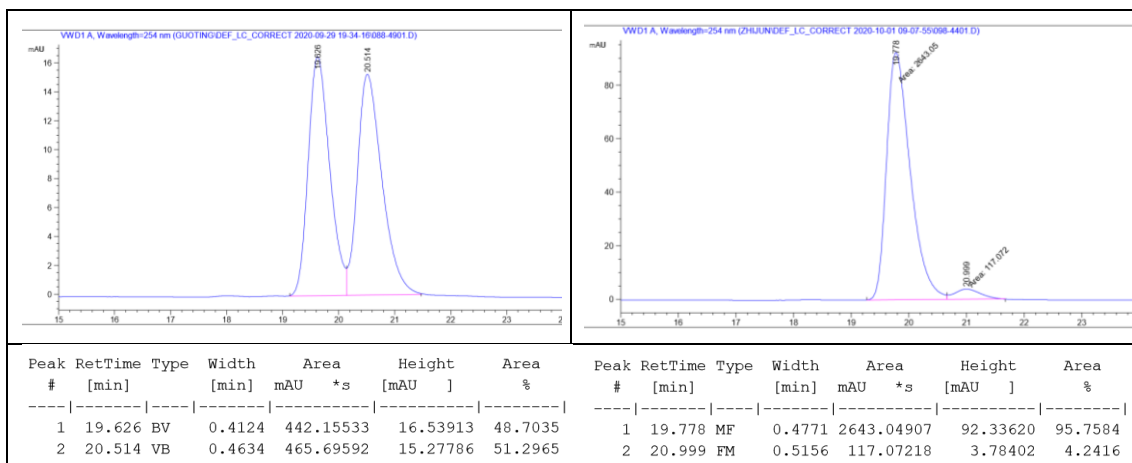

#### IV. Functional groups transformations

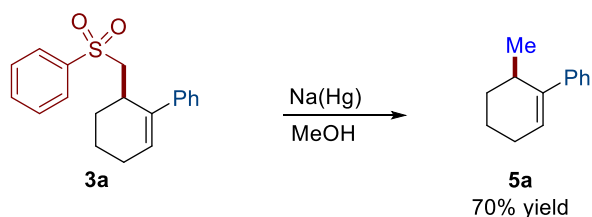

**3a** (62 mg, 0.2 mmol) was dissolved in MeOH (5 mL) and then was treated with 10% Na(Hg) (115 mg) and Na<sub>2</sub>HPO<sub>4</sub> (93 mg, 0.6 mmol). The resulting suspension was stirred for 6 h at room temperature before it was quenched with aqueous NH<sub>4</sub>Cl (5 mL) and extracted with Et<sub>2</sub>O (50 mL x 2), and the combined organic phase was washed with brine (15 mL x 3) and dried (MgSO<sub>4</sub>), filtered, and concentrated. The residue was purified by flash chromatography (hexanes/EtOAc 100:1), to afford **5a** (24 mg, 79% yield) as a colorless oil.

<sup>1</sup>H-NMR (400 MHz, CDCl<sub>3</sub>): δ 7.31-7.29 (m, 4H), 7.24-7.19 (m, 1H), 5.88 (t, d, *J* = 4.0 Hz, 1H), 2.83 (brs, 1H), 2.17-2.15 (m, 1H), 1.89-1.86 (m, 1H), 1.71-1.55 (m, 3H), 0.94 (d, *J* = 8.0 Hz, 3H).

<sup>13</sup>C-NMR (101 MHz, CDCl<sub>3</sub>): δ 143.1, 142.9, 128.2, 126.5, 126.4, 125.6, 77.5, 77.2, 76.8, 31.2, 30.6, 26.4, 20.3, 19.0.



**IR** (cm<sup>-1</sup>): 1598, 1542, 1493, 144, 1361, 997, 880, 75, 697.

**HRMS-EI** (M)<sup>+</sup>: 172.1252, found: 172.1254.

[ $\alpha$ ]<sub>D</sub><sup>24</sup> = +62.8 (*c* = 1.1, CHCl<sub>3</sub>).

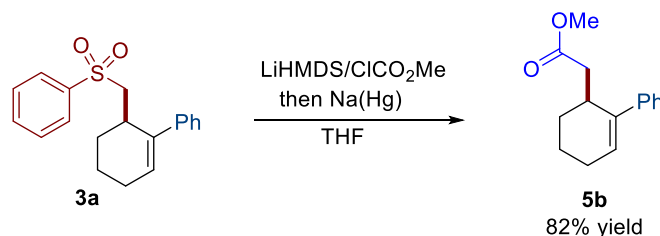

To a solution of sulfone **3a** (62 mg, 0.2 mmol) in THF (1 mL) was added LiHMDS (300  $\mu$ L, 1.0M in THF) at -78 °C. The resulting orange solution was stirred at -78 °C for 30 min before methyl chloroformate (18  $\mu$ L, 0.24 mmol) was added. The mixture was stirred at -78 °C for 2 h, and then saturated aqueous NH<sub>4</sub>Cl (2 mL) was added. The organic phase was separated, and the aqueous layer was extracted with EtOAc (30 mL  $\times$  3 mL). The combined organic phase was washed with brine (15 mL  $\times$  3), dried over (MgSO<sub>4</sub>), and then filtered and concentrated. The crude compound was dissolved in MeOH (5 mL) and then was treated with 10% Na(Hg) (115 mg) and Na<sub>2</sub>HPO<sub>4</sub> (93 mg, 0.6 mmol). The resulting suspension was stirred for 1 h at room temperature before it was quenched with aqueous NH<sub>4</sub>Cl (5 mL) and extracted with Et<sub>2</sub>O (50 mL  $\times$  3), and the combined organic phase was washed with brine (25 mL  $\times$  3) and dried (MgSO<sub>4</sub>), filtered, and concentrated. The residue was purified by flash chromatography (hexanes/EtOAc 95:5) to afford **5b** (38 mg, 82% yield over two steps) as colorless oil.

**<sup>1</sup>H-NMR** (400 MHz, CDCl<sub>3</sub>):  $\delta$  7.32-7.28 (m, 4H), 7.24-7.21 (m, 1H), 5.97 (t, *J* = 4.0 Hz, 1H), 3.59 (s, 3H), 3.26 (brs, 1H), 2.37 (dd, *J* = 12.0, 4.0 Hz, 1H), 2.20-2.16 (m, 3H), 1.88-1.84 (m, 1H), 1.70-1.61 (m, 3H).

**<sup>13</sup>C-NMR** (101 MHz, CDCl<sub>3</sub>):  $\delta$  173.7, 141.8, 140.3, 128.5, 127.5, 127.0, 126.4, 51.6, 38.4, 32.8, 27.9, 26.2, 18.4.

**IR** (cm<sup>-1</sup>): 1737, 1543, 1493, 1435, 1351, 1281, 1169, 759, 699.

[ $\alpha$ ]<sub>D</sub><sup>24</sup> = +75.9 (*c* = 0.8, CHCl<sub>3</sub>).

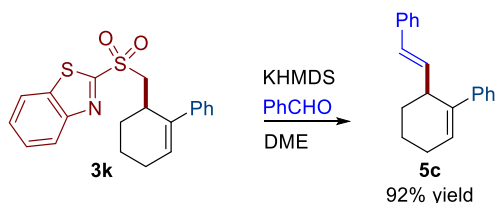

To a solution of sulfone **3k** (74 mg, 0.2 mmol) in DME (1 mL) was added KHMDS (300  $\mu$ L, 1.0M in THF) at  $-78$   $^{\circ}$ C. The resulting orange clear solution was stirred at  $-78$   $^{\circ}$ C for 30 min and then fresh distilled benzaldehyde (31  $\mu$ L, 0.3 mmol) was added. The mixture was stirred at  $-78$   $^{\circ}$ C for 2 h, and then saturated aqueous  $\text{NH}_4\text{Cl}$  (2 mL) was added. The organic phase was separated, and the aqueous layer was extracted with EtOAc (15 mL  $\times$  3 mL). The combined organic phase was washed with brine (15 mL  $\times$  3), dried over ( $\text{MgSO}_4$ ), and then filtered and concentrated. The residue was purified by flash chromatography (pure hexanes) to afford **5c** (48 mg, 92% yield) as a colorless oil.

$^1\text{H-NMR}$  (400 MHz,  $\text{CDCl}_3$ ):  $\delta$  7.40 (d,  $J = 8.0$  Hz, 2H), 7.29-7.22 (m, 6H), 7.19-7.14 (m, 2H), 6.33-6.22 (m, 2H), 6.20 (t,  $J = 4.0$  Hz, 1H), 3.55 (s, 1H), 2.26-2.25 (m, 2H).

$^{13}\text{C-NMR}$  (101 MHz,  $\text{CDCl}_3$ ):  $\delta$  142.2, 138.6, 137.9, 133.8, 131.0, 128.5, 128.3, 127.1, 127.0, 126.6, 126.2, 126.1, 39.5, 29.7, 26.2, 18.1.

$\text{IR}$  ( $\text{cm}^{-1}$ ): 3023, 2861, 1494, 1445, 965, 757, 744, 693.

$\text{HRMS-EI}$  ( $\text{M}^+$ ): 260.1565, found: 260.1569.

$[\alpha]_{\text{D}}^{24} = +116.9$  ( $c = 2.5$ ,  $\text{CHCl}_3$ ).

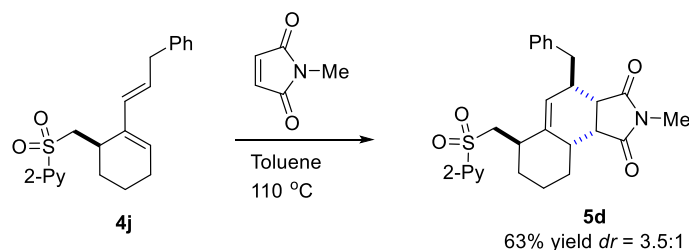

To a solution of sulfone **4j** (38 mg, 0.12 mmol) in dry toluene (1.0 mL) was added 1-methyl-1H-pyrrole-2,5-dione (27 mg, 0.24 mmol) and then the mixture was heated at  $110$   $^{\circ}$ C for 12 hours. The mixture was purified by flash chromatography (hexanes/EtOAc 50:50) to afford **5d** as a mixture (35 mg, 63% yield,  $dr = 3.5:1$ ) as

pale yellow foam.

**<sup>1</sup>H-NMR** (400 MHz, CDCl<sub>3</sub>): δ 8.71 (d, *J* = 8.0 Hz, 1H), 8.06-8.01 (m, 1H), 7.94 (t, *J* = 8.0 Hz, 1H), 7.55-7.52 (m, 1H), 7.30-7.26 (m, 5H), 7.24-7.20 (m, 1H), 5.39 (s, 1H), 3.75 (dd, *J* = 16.0, 8.0 Hz, 1H), 3.37-3.21 (m, 2H), 2.96-2.82 (m, 3H), 2.90 (m, 3H), 2.44 (brs, 1H), 2.29 (brs, 1H), 2.02-1.94 (m, 2H), 1.83-1.80 (m, 2H), 1.43-1.27 (m, 2H).

**<sup>13</sup>C-NMR** (101 MHz, CDCl<sub>3</sub>): δ 177.9, 177.4, 158.1, 150.2, 142.3, 140.3, 138.4, 129.3, 129.3, 128.6, 127.5, 126.4, 123.6, 121.9, 53.6, 44.0, 42.7, 38.7, 37.3, 37.0, 32.4, 28.0, 24.7, 23.5, 20.6.

**IR** (cm<sup>-1</sup>): 1696, 1431, 1382, 1308, 1163, 1111, 992, 754, 703.

**HRMS-ESI** (M+H)<sup>+</sup>: 465.1848, found: 465.1844.

[α]<sub>D</sub><sup>24</sup> = -2.1 (*c* = 2.5, CHCl<sub>3</sub>)

## V. Synthesis of the substrates

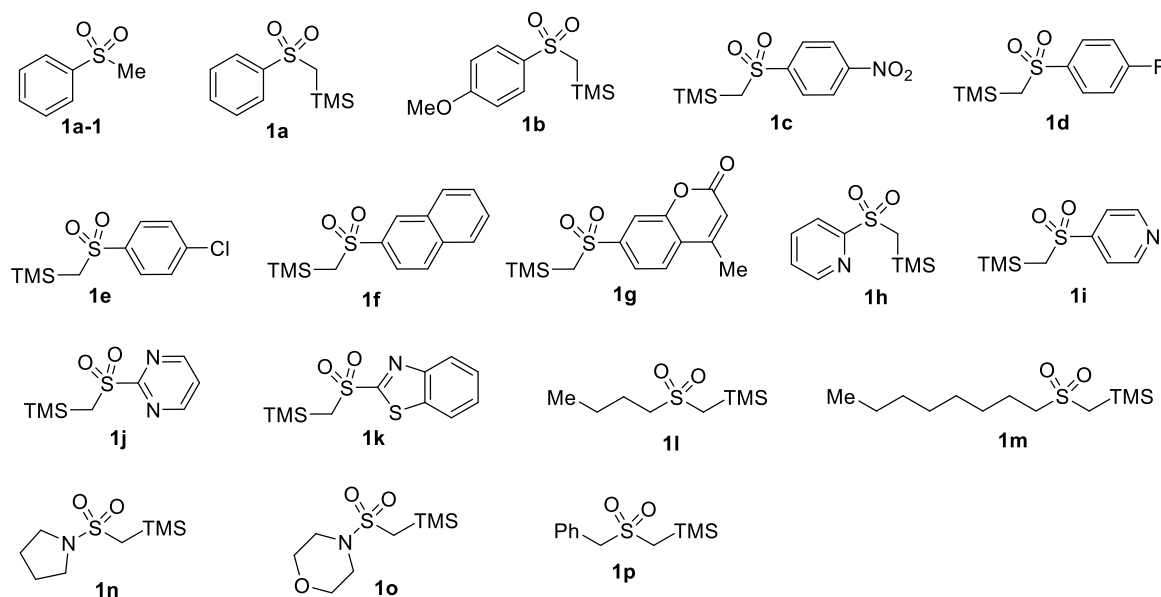

**Figure S-3.** Summary of different sulfone donors.

Methyl phenyl sulfone **1a-1** (CAS: 3112-85-4) and (phenylsulfonylmethyl)trimethylsilane **1a** (CAS: 17872-92-3) are commercial compounds in Aldrich; all the allylic compounds (**2a-2p**) were synthesized according

to our previous procedure (*J. Am. Chem. Soc.* **2019**, *141*, 11446–11451).

**General Procedure A**

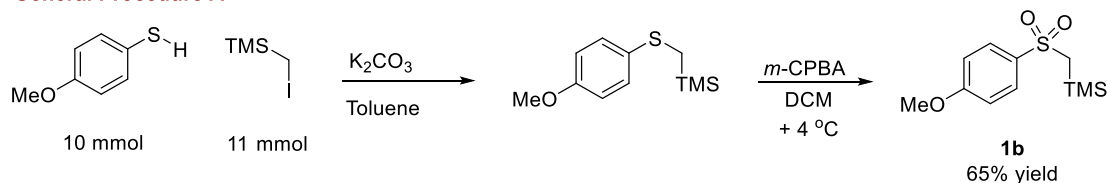

**General procedure A:** To a flame-dried 100 mL flask was added 4-methoxybenzenethiol (1.23 mL, 10 mmol), TMSCH<sub>2</sub>I (1.63 mL, 11 mmol), K<sub>2</sub>CO<sub>3</sub> (3.4 g, 25 mmol), 18-crown-6 (100 mg, cat.) and fresh distilled toluene (30 mL). The reaction mixture was heated to 110 °C and stirred for another for 6 hours, then the mixture was cooled to room temperature and the solid was removed via a short column on celite and the filtrate was concentrated under vacuum and the residue was used for the next steps.

Above residue was dissolved in DCM (30 mL) and *m*-CPBA (4.9 g, 77% Aldrich, 22 mmol) was added portion wise at 0 °C and the mixture was stirred at this temperature for another 30 min. The reaction was quenched with aqueous K<sub>2</sub>CO<sub>3</sub> (20 mL) and extracted with EA (50 mL x 3), the combined organic solution was washed with Na<sub>2</sub>S<sub>2</sub>O<sub>3</sub> (15 mL x 2), brine (20 mL x 3) and then dried over MgSO<sub>4</sub> and concentrated *in vacuo*. The crude mixture was dissolved in EA/DCM (1:1, 2 mL) and hexanes (10 mL) was added to the mixture, the white solid was filtered which is pure enough for the further asymmetric transformation. (1.67 g, 75% yield over two steps).

<sup>1</sup>H-NMR (400 MHz, CDCl<sub>3</sub>): δ 7.82 (d, *J* = 8.0 Hz, 2H), 6.97 (d, *J* = 8.0 Hz, 2H), 3.85 (s, 3H), 2.76 (s, 2H), 0.25 (s, 9H).

<sup>13</sup>C-NMR (101 MHz, CDCl<sub>3</sub>): δ 163.1, 135.8, 128.9, 114.3, 55.8, 49.0, -0.60.

HRMS-EI (M)<sup>+</sup>: 258.0746, found: 258.0755.

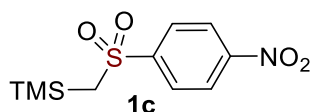

**Trimethyl(((4-nitrophenyl)sulfonyl)methyl)silane.**

This compound was synthesized according to “**General Procedure A**” from

4-nitrobenzenethiol (930 mg, 6.0 mmol), and **1c** was obtained as a pale yellow solid (980 mg, 60% yield over two steps).

**<sup>1</sup>H-NMR** (400 MHz, CDCl<sub>3</sub>): δ 8.36 (d, *J* = 8.0 Hz, 2H), 8.10 (d, *J* = 8.0 Hz, 2H), 2.80 (s, 2H), 0.33 (s, 9H).

**<sup>13</sup>C-NMR** (101 MHz, CDCl<sub>3</sub>): δ 149.2, 129.1, 128.3, 124.6, 48.3, -0.45.

**HRMS-ESI** (M+H)<sup>+</sup>: 274.0576, found: 274.0574.

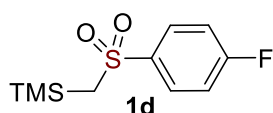

**(((4-Fluorophenyl)sulfonyl)methyl)trimethylsilane.**

This compound was synthesized according to “**General Procedure A**” from 4-fluorobenzenethiol (640 uL, 6.0 mmol), and **1d** was obtained as a white solid (910 mg, 62% yield over two steps).

**<sup>1</sup>H-NMR** (400 MHz, CDCl<sub>3</sub>): δ 7.92-7.89 (m, 2H), 7.20-7.16 (m, 2H), 2.77 (s, 2H), 0.27 (s, 9H).

**<sup>19</sup>F NMR** (376.6 MHz, CDCl<sub>3</sub>): δ -105.6.

**<sup>13</sup>C-NMR** (101 MHz, CDCl<sub>3</sub>): δ 165.3 (d, *J* = 256.5 Hz), 140.0 (d, *J* = 3.0 Hz), 129.6 (d, *J* = 9.1 Hz), 116.4 (d, *J* = 22.2 Hz), 48.8, -0.58.

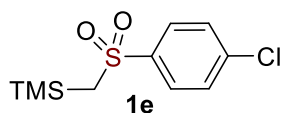

**(((4-Chlorophenyl)sulfonyl)methyl)trimethylsilane.**

This compound was synthesized according to “**General Procedure A**” from 4-chlorobenzenethiol (858 mg, 6.0 mmol), and **1c** was obtained as a white solid (1.1 g, 70% yield over two steps).

**<sup>1</sup>H-NMR** (400 MHz, CDCl<sub>3</sub>): δ 7.84 (d, *J* = 8.0 Hz, 2H), 7.49 (d, *J* = 8.0 Hz, 2H), 2.76 (s, 2H), 0.29 (s, 9H).

**<sup>13</sup>C-NMR** (101 MHz, CDCl<sub>3</sub>): δ 142.4, 139.5, 129.5, 128.4, 48.7, -0.52.

**HRMS -ESI** (M+Na)<sup>+</sup>: 285.0148, found: 285.0150.

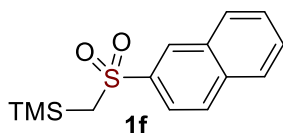

**Trimethyl((naphthalen-2-ylsulfonyl)methyl)silane.**

This compound was synthesized according to “**General Procedure A**” from naphthalene-2-thiol (960 mg, 6.0 mmol), and **1f** was obtained as a white solid (1.1 g, 66% yield over two steps).

<sup>1</sup>H-NMR (400 MHz, CDCl<sub>3</sub>): δ 8.47 (s, 1H), 7.98-7.96 (m, 2H), 7.91-7.87 (m, 2H), 7.66-7.58 (m, 2H), 2.86 (s, 2H), 0.31 (s, 9H).

<sup>13</sup>C-NMR (101 MHz, CDCl<sub>3</sub>): δ 140.7, 135.0, 132.3, 129.6, 129.4, 128.9, 128.0, 127.9, 127.7, 122.2, 48.6, -0.49.

HRMS-EI (M)<sup>+</sup>: 278.0797, found: 278.0805.

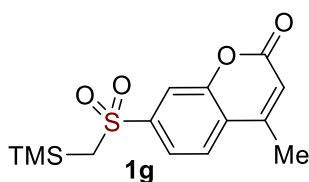

**4-Methyl-7-(((trimethylsilyl)methyl)sulfonyl)-2H-chromen-2-one.**

This compound was synthesized according to “**General Procedure A**” from 7-mercapto-4-methyl-2H-chromen-2-one (960 mg, 6.0 mmol), and **1g** was obtained as a pink solid (967 mg, 52% yield over two steps).

<sup>1</sup>H-NMR (400 MHz, CDCl<sub>3</sub>): δ 7.80-7.73 (m, 3H), 6.39 (s, 1H), 2.80 (s, 2H), 2.47 (s, 3H), 0.30 (s, 9H).

<sup>13</sup>C-NMR (101 MHz, CDCl<sub>3</sub>): δ 159.4, 153.2, 151.0, 146.3, 125.8, 123.3, 121.9, 117.5, 115.6, 48.2, 18.7, -0.62.

HRMS-ESI (M+H)<sup>+</sup>: 295.0460, found: 295.0463.

**General Procedure B**

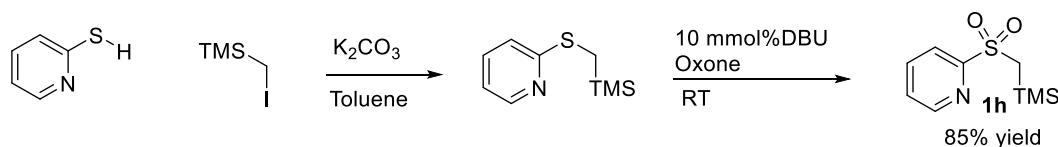

**General procedure B:** To a flame-dried 100 mL flask was added pyridine-2-thiol (1.1

g, 10 mmol), TMSCH<sub>2</sub>I (1.63 mL, 11 mmol), K<sub>2</sub>CO<sub>3</sub> (3.4 g, 25 mmol), 18-crown-6 (100 mg, cat.) and fresh distilled toluene (30 mL). The reaction mixture was heated to 110 °C and stirred for another for 6 hours, then the mixture was cooled to room temperature and the solid was removed via a short column on celite and the filtrate was concentrated under vacuum and the residue was used for the next steps.

Above residue was dissolved in CH<sub>3</sub>CN/H<sub>2</sub>O (21 mL, 1:3) and Oxone (15 g, 25 mmol) and DBU (149 uL, 1.0 mmol) were added at room temperature, the mixture was stirred for another 10 mins. The reaction was extracted with EA (50 mL x 3), the combined organic solution was washed with Na<sub>2</sub>S<sub>2</sub>O<sub>3</sub> (15 mL x 2), brine (20 mL x 3) and then dried over MgSO<sub>4</sub> and concentrated *in vacuo*. The crude mixture was dissolved in EA/DCM (1:1, 2 mL) and hexanes (15 mL) was added to the mixture, the white solid was filtered which is pure enough for the further asymmetric transformation. (1.94 g, 85% yield over two steps).

<sup>1</sup>H-NMR (400 MHz, CDCl<sub>3</sub>): δ 8.68-8.66 (m, 1H), 8.02-7.99 (m, 1H), 7.93-7.81 (m, 1H), 7.50-7.40 (m, 1H), 2.99 (s, 3H), 0.25 (s, 9H).

<sup>13</sup>C-NMR (101 MHz, CDCl<sub>3</sub>): δ 160.0, 149.9, 138.2, 127.0, 120.5, 42.9, -0.58.

HRMS-ESI (M+H)<sup>+</sup>: 230.0671, found: 230.0669.

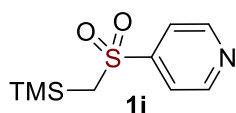

#### 4-(((Trimethylsilyl)methyl)sulfonyl)pyridine.

This compound was synthesized according to “**General Procedure A**” from pyridine-4-thiol (666 mg, 6.0 mmol), and **1i** was purified by flash silica column chromatography (petroleum ether/ EtOAc 50: 50), affording the title compound (577 mg, 42% yield over two steps) as a yellow oil.

<sup>1</sup>H-NMR (400 MHz, CDCl<sub>3</sub>): δ 8.82 (d, *J* = 8.0 Hz, 2H), 7.72 (d, *J* = 8.0 Hz, 2H), 2.75 (s, 2H), 0.27 (s, 9H).

<sup>13</sup>C-NMR (101 MHz, CDCl<sub>3</sub>): δ 151.2, 120.0., 47.6, -0.54.

HRMS-ESI (M+H)<sup>+</sup>: 230.0671, found: 230.0665.

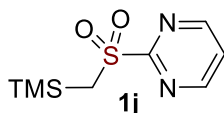

### 2-(((Trimethylsilyl)methyl)sulfonyl)pyrimidine

This compound was synthesized according to “**General Procedure B**” from pyrimidine-2-thiol (672 mg, 6.0 mmol), and **1j** was purified by flash silica column chromatography (petroleum ether/ EtOAc 40: 60), affording the title compound (1.13 g, 82% yield over two steps) as a colorless oil.

<sup>1</sup>H-NMR (400 MHz, CDCl<sub>3</sub>): δ 8.85 (d, *J* = 4.0 Hz, 2H), 7.51 (t, *J* = 4.0 Hz, 1H), 3.05 (s, 2H), 0.21 (s, 9H).

<sup>13</sup>C-NMR (101 MHz, CDCl<sub>3</sub>): δ 167.2, 158.5, 123.6, 41.9, -0.67.

HRMS-ESI (M+H)<sup>+</sup>: 231.0623, found: 231.0621.

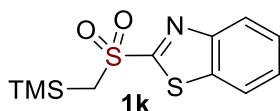

### 2-(((Trimethylsilyl)methyl)sulfonyl)benzo[*d*]thiazole.

This compound was synthesized according to “**General Procedure B**” from benzo[*d*]thiazole-2-thiol (996 mg, 6.0 mmol), and **1k** was obtained as a white solid (1.0 g, 58% yield over two steps).

<sup>1</sup>H-NMR (400 MHz, CDCl<sub>3</sub>): δ 8.14 (d, *J* = 8.0 Hz, 1H), 7.95 (dd, *J* = 8.0, 4.0 Hz, 1H), 7.60-7.51 (m, 2H), 3.19 (s, 2H), 0.34 (s, 9H).

<sup>13</sup>C-NMR (101 MHz, CDCl<sub>3</sub>): δ 169.2, 152.5, 136.3, 127.8, 127.5, 125.2, 122.4, 45.8, -0.50.

HRMS-ESI (M+H)<sup>+</sup>: 286.0392, found: 286.0395.

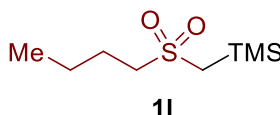

### ((Butylsulfonyl)methyl)trimethylsilane.

This compound was synthesized according to “**General Procedure A**” from benzo[*d*]thiazole-2-thiol (996 mg, 6.0 mmol), and **1l** was purified by flash silica



column chromatography (petroleum ether/ EtOAc 85: 15), affording the title compound (470 mg, 38% yield over two steps) as a colorless oil.

$^1\text{H-NMR}$  (400 MHz,  $\text{CDCl}_3$ ):  $\delta$  2.92 (t,  $J = 8.0$  Hz, 2H), 2.56 (s, 2H), 1.79-1.72 (m, 2H), 1.44-1.36 (m, 2H), 0.90 (t,  $J = 8.0$  Hz, 3H), 0.23 (s, 9H).

$^{13}\text{C-NMR}$  (101 MHz,  $\text{CDCl}_3$ ):  $\delta$  57.1, 43.3, 24.8, 21.7, 13.6, -0.60.

**HRMS-ESI** ( $\text{M}+\text{Na}$ ) $^+$ : 231.0851, found: 231.0847.

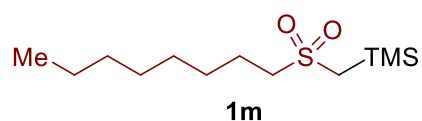

### Trimethyl((octylsulfonyl)methyl)silane.

This compound was synthesized according to “**General Procedure A**” from octane-1-thiol (1.0 mL, 6.0 mmol), and **1m** was purified by flash silica column chromatography (petroleum ether/ EtOAc 90: 10), affording the title compound (740 mg, 47% yield over two steps) as a white solid

$^1\text{H-NMR}$  (400 MHz,  $\text{CDCl}_3$ ):  $\delta$  2.94 (t,  $J = 8.0$  Hz, 2H), 2.57 (s, 2H), 1.81-1.77 (m, 2H), 1.39-1.38 (m, 2H), 1.30-1.20 (m, 8H), 0.85 (t,  $J = 8.0$  Hz, 3H), 0.25 (s, 9H).

$^{13}\text{C-NMR}$  (101 MHz,  $\text{CDCl}_3$ ):  $\delta$  57.4, 43.4, 31.8, 29.1, 29.0, 28.5, 22.9, 22.6, 14.1, -0.53.

**HRMS-EI** ( $\text{M}$ ) $^+$ : 264.1579, found: 264.1583.

### General Procedure C

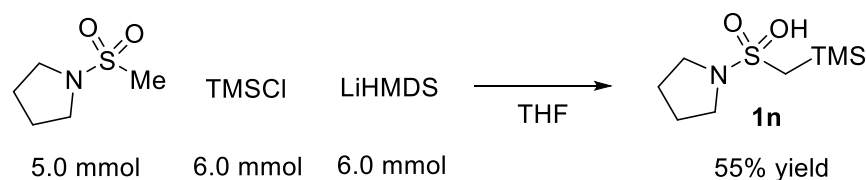

**General Procedure C:** To a solution of 1-(methylsulfonyl)pyrrolidine (750 mg, 5.0 mmol) in THF (10 mL) was added LiHMDS (6.0 mL, 1.0M in THF) at  $-78$  °C. The resulting orange solution was stirred at  $-78$  °C for 1 hour before TMSCl (760  $\mu\text{L}$ , 6.0 mmol) was added. The mixture was stirred at  $-78$  °C for 1 h, and then saturated

aqueous  $\text{NH}_4\text{Cl}$  (10 mL) was added. The organic phase was separated, and the aqueous layer was extracted with EtOAc (50 mL  $\times$  3 mL). The combined organic phase was washed with brine (25 mL  $\times$  3), dried over ( $\text{MgSO}_4$ ), and then filtered and concentrated. The residue was purified by flash chromatography (hexanes/EtOAc 90:10) to afford **1n** (607 mg, 55% yield) as a white solid.

$^1\text{H-NMR}$  (400 MHz,  $\text{CDCl}_3$ ):  $\delta$  2.94 (t,  $J = 8.0$  Hz, 2H), 2.57 (s, 2H), 1.81-1.77 (m, 2H), 1.39-1.38 (m, 2H), 1.30-1.20 (m, 8H), 0.85 (t,  $J = 8.0$  Hz, 3H), 0.25 (s, 9H).

$^{13}\text{C-NMR}$  (101 MHz,  $\text{CDCl}_3$ ):  $\delta$  47.1, 46.3, 25.7, 1.00.

**HRMS-ESI** ( $\text{M}+\text{H}$ ) $^+$ : 222.0984, found: 222.0979.

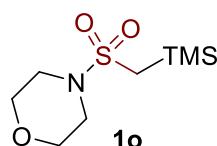

**((Butylsulfonyl)methyl)trimethylsilane.**

This compound was synthesized according to “**General Procedure C**” from 4-(methylsulfonyl)morpholine (830 mg, 5.0 mmol), and **1o** was purified by flash silica column chromatography (petroleum ether/ EtOAc 80: 20), affording the title compound (663 mg, 56% yield over two steps) as a colorless oil.

$^1\text{H-NMR}$  (400 MHz,  $\text{CDCl}_3$ ):  $\delta$  3.75 (t,  $J = 4.0$  Hz, 2H), 3.09 (t,  $J = 4.0$  Hz, 2H), 2.37 (s, 2H), 0.24 (s, 9H).

$^{13}\text{C-NMR}$  (101 MHz,  $\text{CDCl}_3$ ):  $\delta$  66.3, 46.0, 35.7, -0.83.

**HRMS-ESI** ( $\text{M}+\text{H}$ ) $^+$ : 238.0933, found: 238.0928.

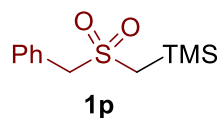

**((Benzylsulfonyl)methyl)trimethylsilane.**

This compound was synthesized according to “**General Procedure A**” from 4-nitrobenzenethiol (930 mg, 6.0 mmol), and **1p** was obtained as a white solid (1.02 g, 70% yield over two steps).

$^1\text{H-NMR}$  (400 MHz,  $\text{CDCl}_3$ ):  $\delta$  4.07 (s, 2H), 2.32 (s, 2H), 0.10 (s, 9H).

**<sup>13</sup>C-NMR** (101 MHz, CDCl<sub>3</sub>): δ 130.7, 129.4, 129.1, 128.9, 63.8, 41.9, -0.48.

**HRMS-ESI** (M+Na)<sup>+</sup>: 265.0694, found: 265.0693.

# checkCIF/PLATON report

Structure factors have been supplied for datablock(s) zjd783

THIS REPORT IS FOR GUIDANCE ONLY. IF USED AS PART OF A REVIEW PROCEDURE FOR PUBLICATION, IT SHOULD NOT REPLACE THE EXPERTISE OF AN EXPERIENCED CRYSTALLOGRAPHIC REFEREE.

No syntax errors found.      CIF dictionary      Interpreting this report

## Datablock: zjd783

---

Bond precision:    C-C = 0.0031 A                      Wavelength=1.54178

Cell:                      a=9.1212(5)              b=8.4842(4)              c=20.1475(10)  
                                    alpha=90              beta=90.270(2)              gamma=90

Temperature:              120 K

|                | Calculated     | Reported       |
|----------------|----------------|----------------|
| Volume         | 1559.12(14)    | 1559.12(14)    |
| Space group    | P 21           | P 21           |
| Hall group     | P 2yb          | P 2yb          |
| Moiety formula | C18 H19 N O2 S | C18 H19 N O2 S |
| Sum formula    | C18 H19 N O2 S | C18 H19 N O2 S |
| Mr             | 313.40         | 313.40         |
| Dx,g cm-3      | 1.335          | 1.335          |
| Z              | 4              | 4              |
| Mu (mm-1)      | 1.894          | 1.894          |
| F000           | 664.0          | 664.0          |
| F000'          | 667.07         |                |
| h,k,lmax       | 11,10,24       | 11,10,24       |
| Nref           | 5962[ 3197]    | 5761           |
| Tmin,Tmax      | 0.775,0.899    | 0.688,1.000    |
| Tmin'          | 0.613          |                |

Correction method= # Reported T Limits: Tmin=0.688 Tmax=1.000  
AbsCorr = NUMERICAL

Data completeness= 1.80/0.97                      Theta(max)= 70.362

R(reflections)= 0.0258( 5643)                      wR2(reflections)= 0.0652( 5761)

S = 1.022                                              Npar= 397

---

The following ALERTS were generated. Each ALERT has the format

**test-name\_ALERT\_alert-type\_alert-level.**

Click on the hyperlinks for more details of the test.

---

**● Alert level C**

PLAT987\_ALERT\_1\_C The Flack x is >> 0 - Do a BASF/TWIN Refinement Please Check

---

**● Alert level G**

PLAT033\_ALERT\_4\_G Flack x Value Deviates > 3.0 \* sigma from Zero . 0.046 Note  
PLAT720\_ALERT\_4\_G Number of Unusual/Non-Standard Labels ..... 2 Note  
PLAT791\_ALERT\_4\_G Model has Chirality at C8 (Sohnke SpGr) R Verify  
PLAT791\_ALERT\_4\_G Model has Chirality at C8A (Sohnke SpGr) R Verify  
PLAT912\_ALERT\_4\_G Missing # of FCF Reflections Above STh/L= 0.600 22 Note  
PLAT978\_ALERT\_2\_G Number C-C Bonds with Positive Residual Density. 11 Info

---

0 **ALERT level A** = Most likely a serious problem - resolve or explain  
0 **ALERT level B** = A potentially serious problem, consider carefully  
1 **ALERT level C** = Check. Ensure it is not caused by an omission or oversight  
6 **ALERT level G** = General information/check it is not something unexpected

1 ALERT type 1 CIF construction/syntax error, inconsistent or missing data  
1 ALERT type 2 Indicator that the structure model may be wrong or deficient  
0 ALERT type 3 Indicator that the structure quality may be low  
5 ALERT type 4 Improvement, methodology, query or suggestion  
0 ALERT type 5 Informative message, check

---

It is advisable to attempt to resolve as many as possible of the alerts in all categories. Often the minor alerts point to easily fixed oversights, errors and omissions in your CIF or refinement strategy, so attention to these fine details can be worthwhile. In order to resolve some of the more serious problems it may be necessary to carry out additional measurements or structure refinements. However, the purpose of your study may justify the reported deviations and the more serious of these should normally be commented upon in the discussion or experimental section of a paper or in the "special\_details" fields of the CIF. checkCIF was carefully designed to identify outliers and unusual parameters, but every test has its limitations and alerts that are not important in a particular case may appear. Conversely, the absence of alerts does not guarantee there are no aspects of the results needing attention. It is up to the individual to critically assess their own results and, if necessary, seek expert advice.

**Publication of your CIF in IUCr journals**

A basic structural check has been run on your CIF. These basic checks will be run on all CIFs submitted for publication in IUCr journals (*Acta Crystallographica*, *Journal of Applied Crystallography*, *Journal of Synchrotron Radiation*); however, if you intend to submit to *Acta Crystallographica Section C* or *E* or *IUCrData*, you should make sure that full publication checks are run on the final version of your CIF prior to submission.

**Publication of your CIF in other journals**

Please refer to the *Notes for Authors* of the relevant journal for any special instructions relating to CIF submission.

---

**PLATON version of 18/09/2020; check.def file version of 20/08/2020**

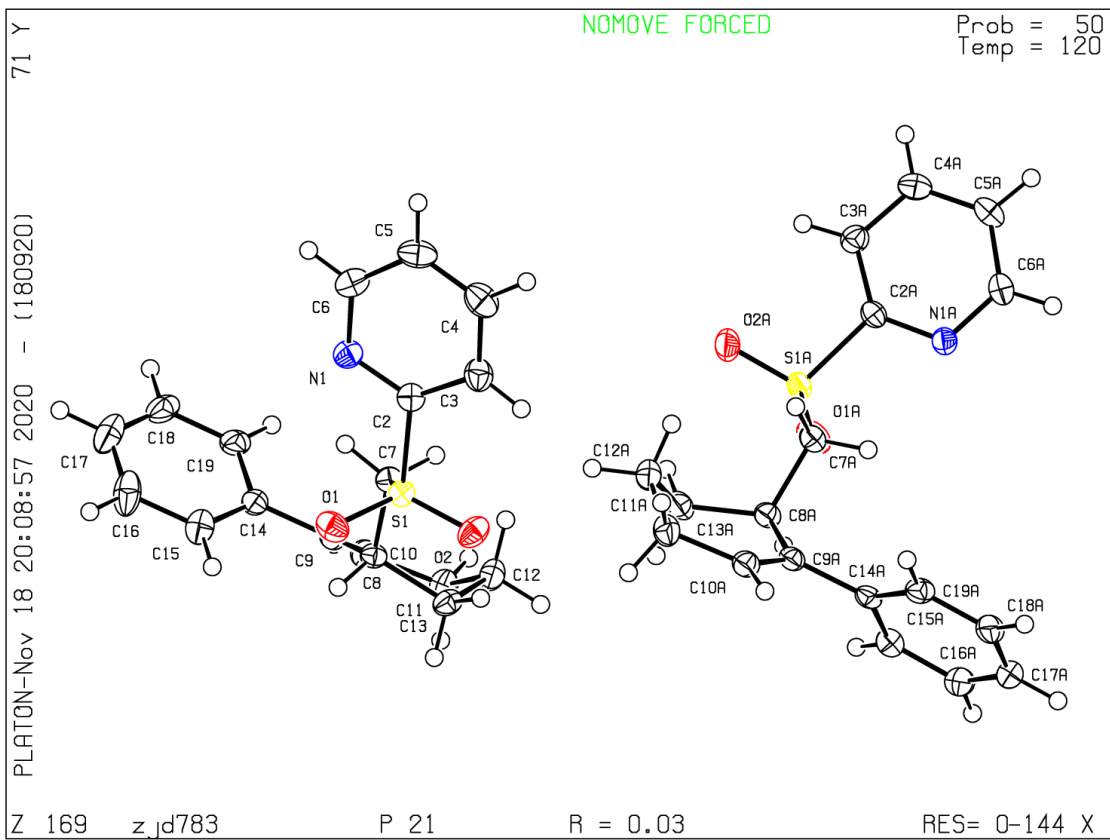

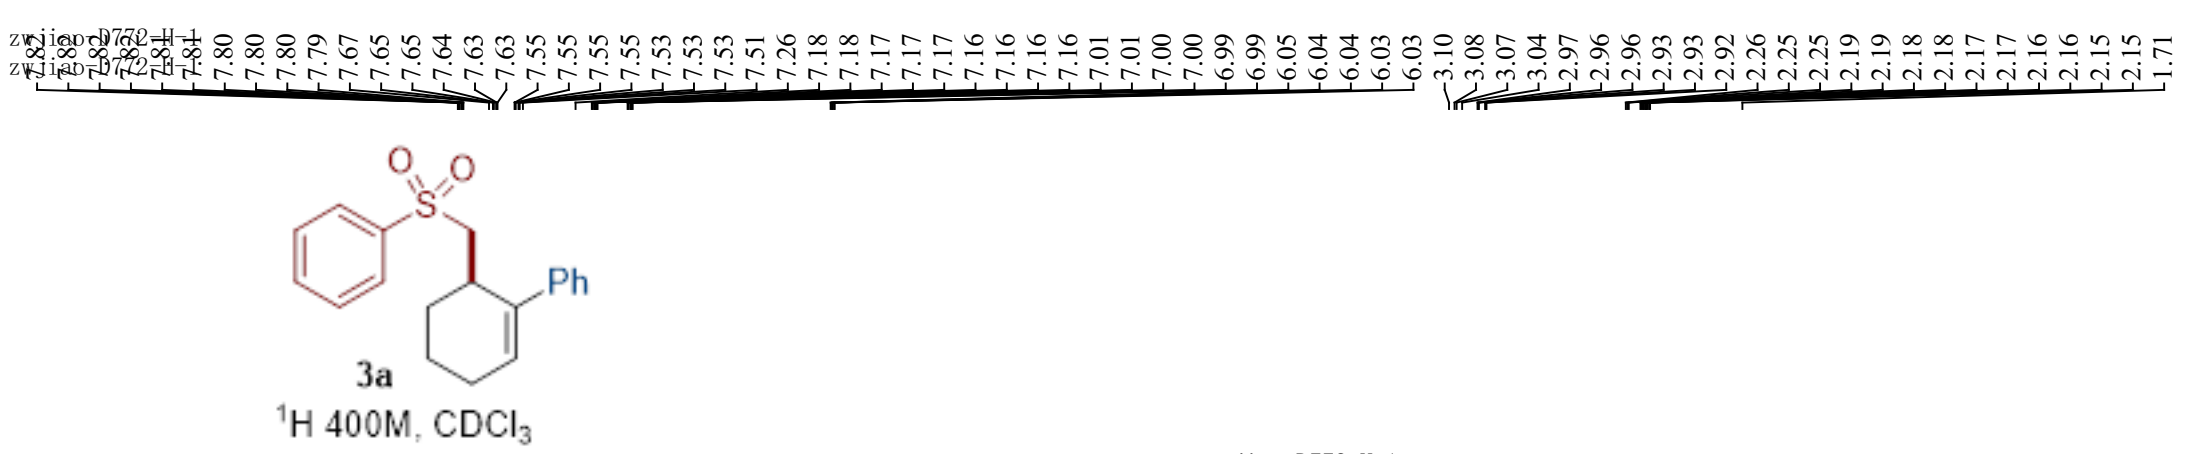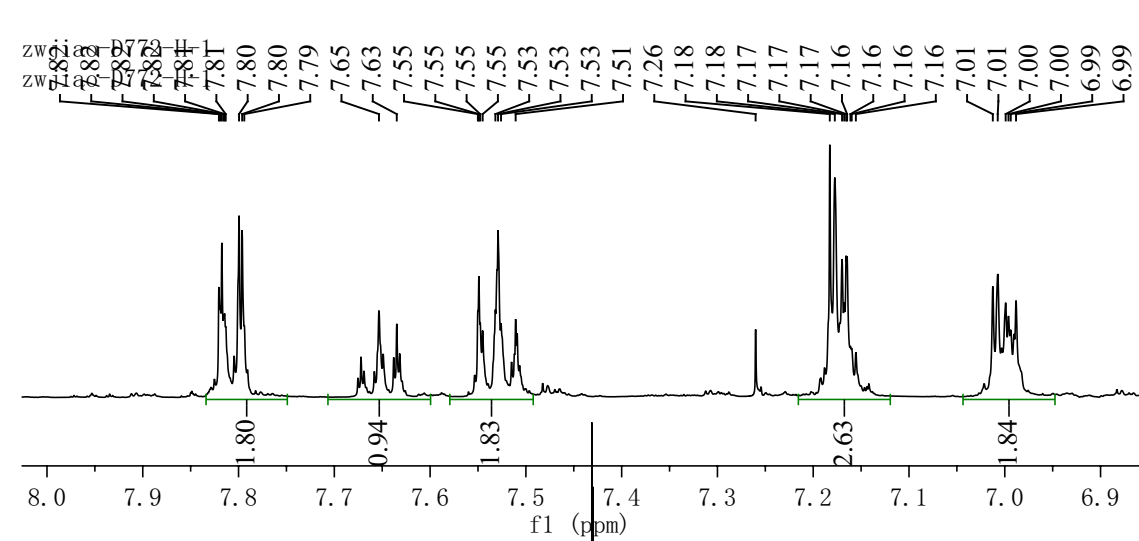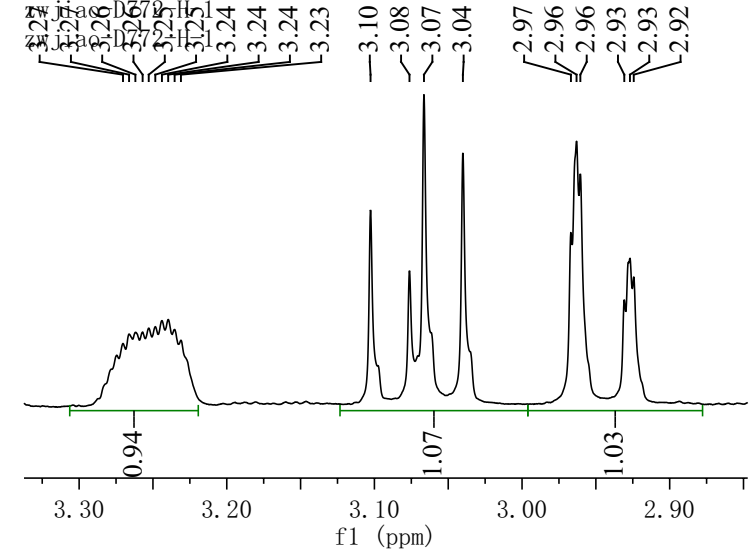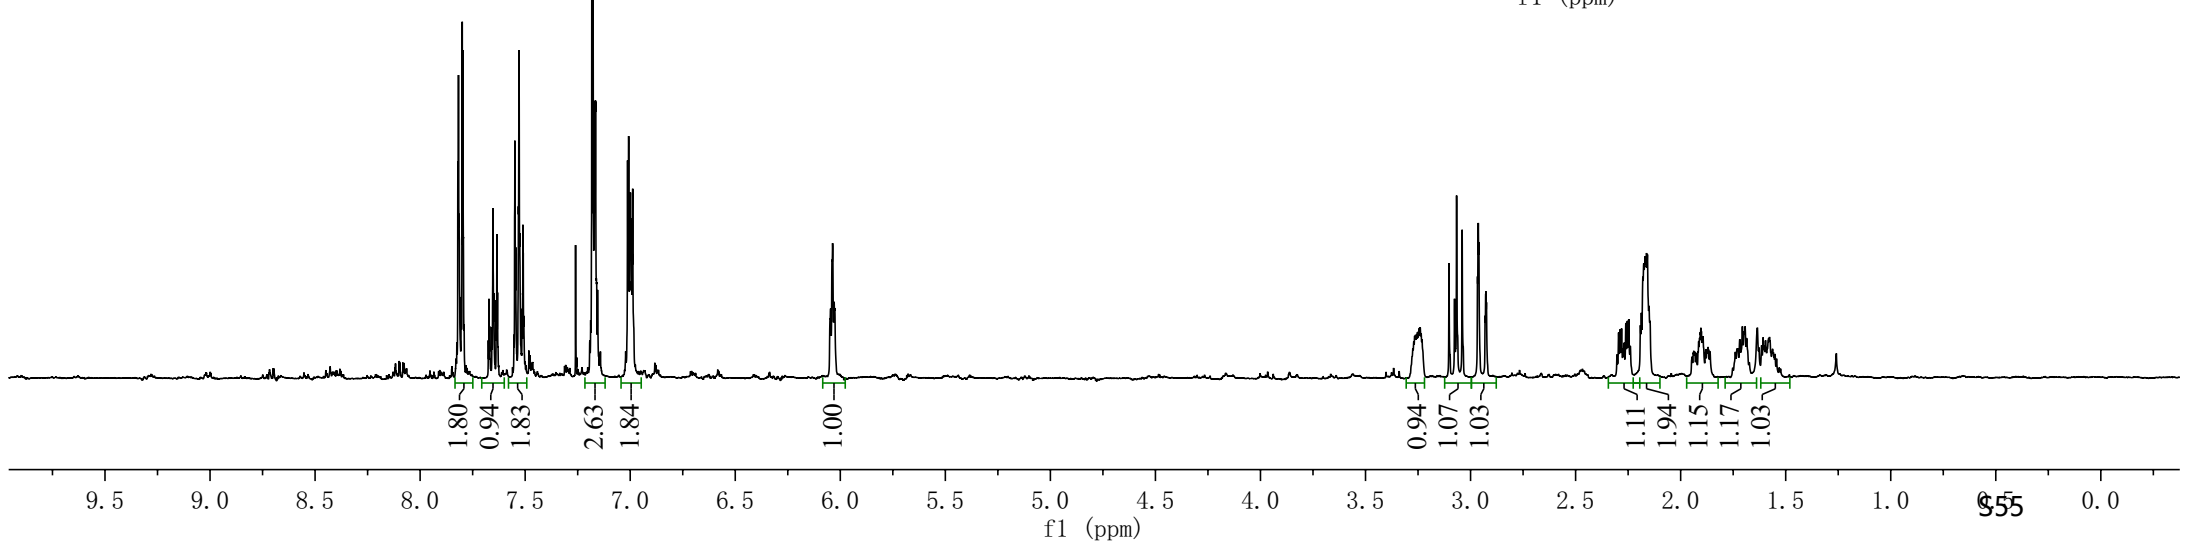

zwjiao-D772-C  
zwjiao-D772-C

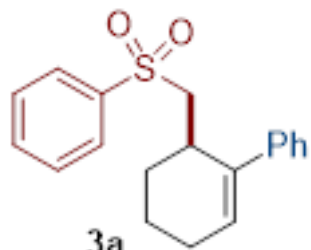

<sup>13</sup>C 101M, CDCl<sub>3</sub>

140.15  
139.49  
138.01  
133.65  
129.36  
129.06  
128.59  
128.16  
127.20  
126.01

77.48  
77.16  
76.84

58.05

30.88  
26.65  
25.84  
17.73

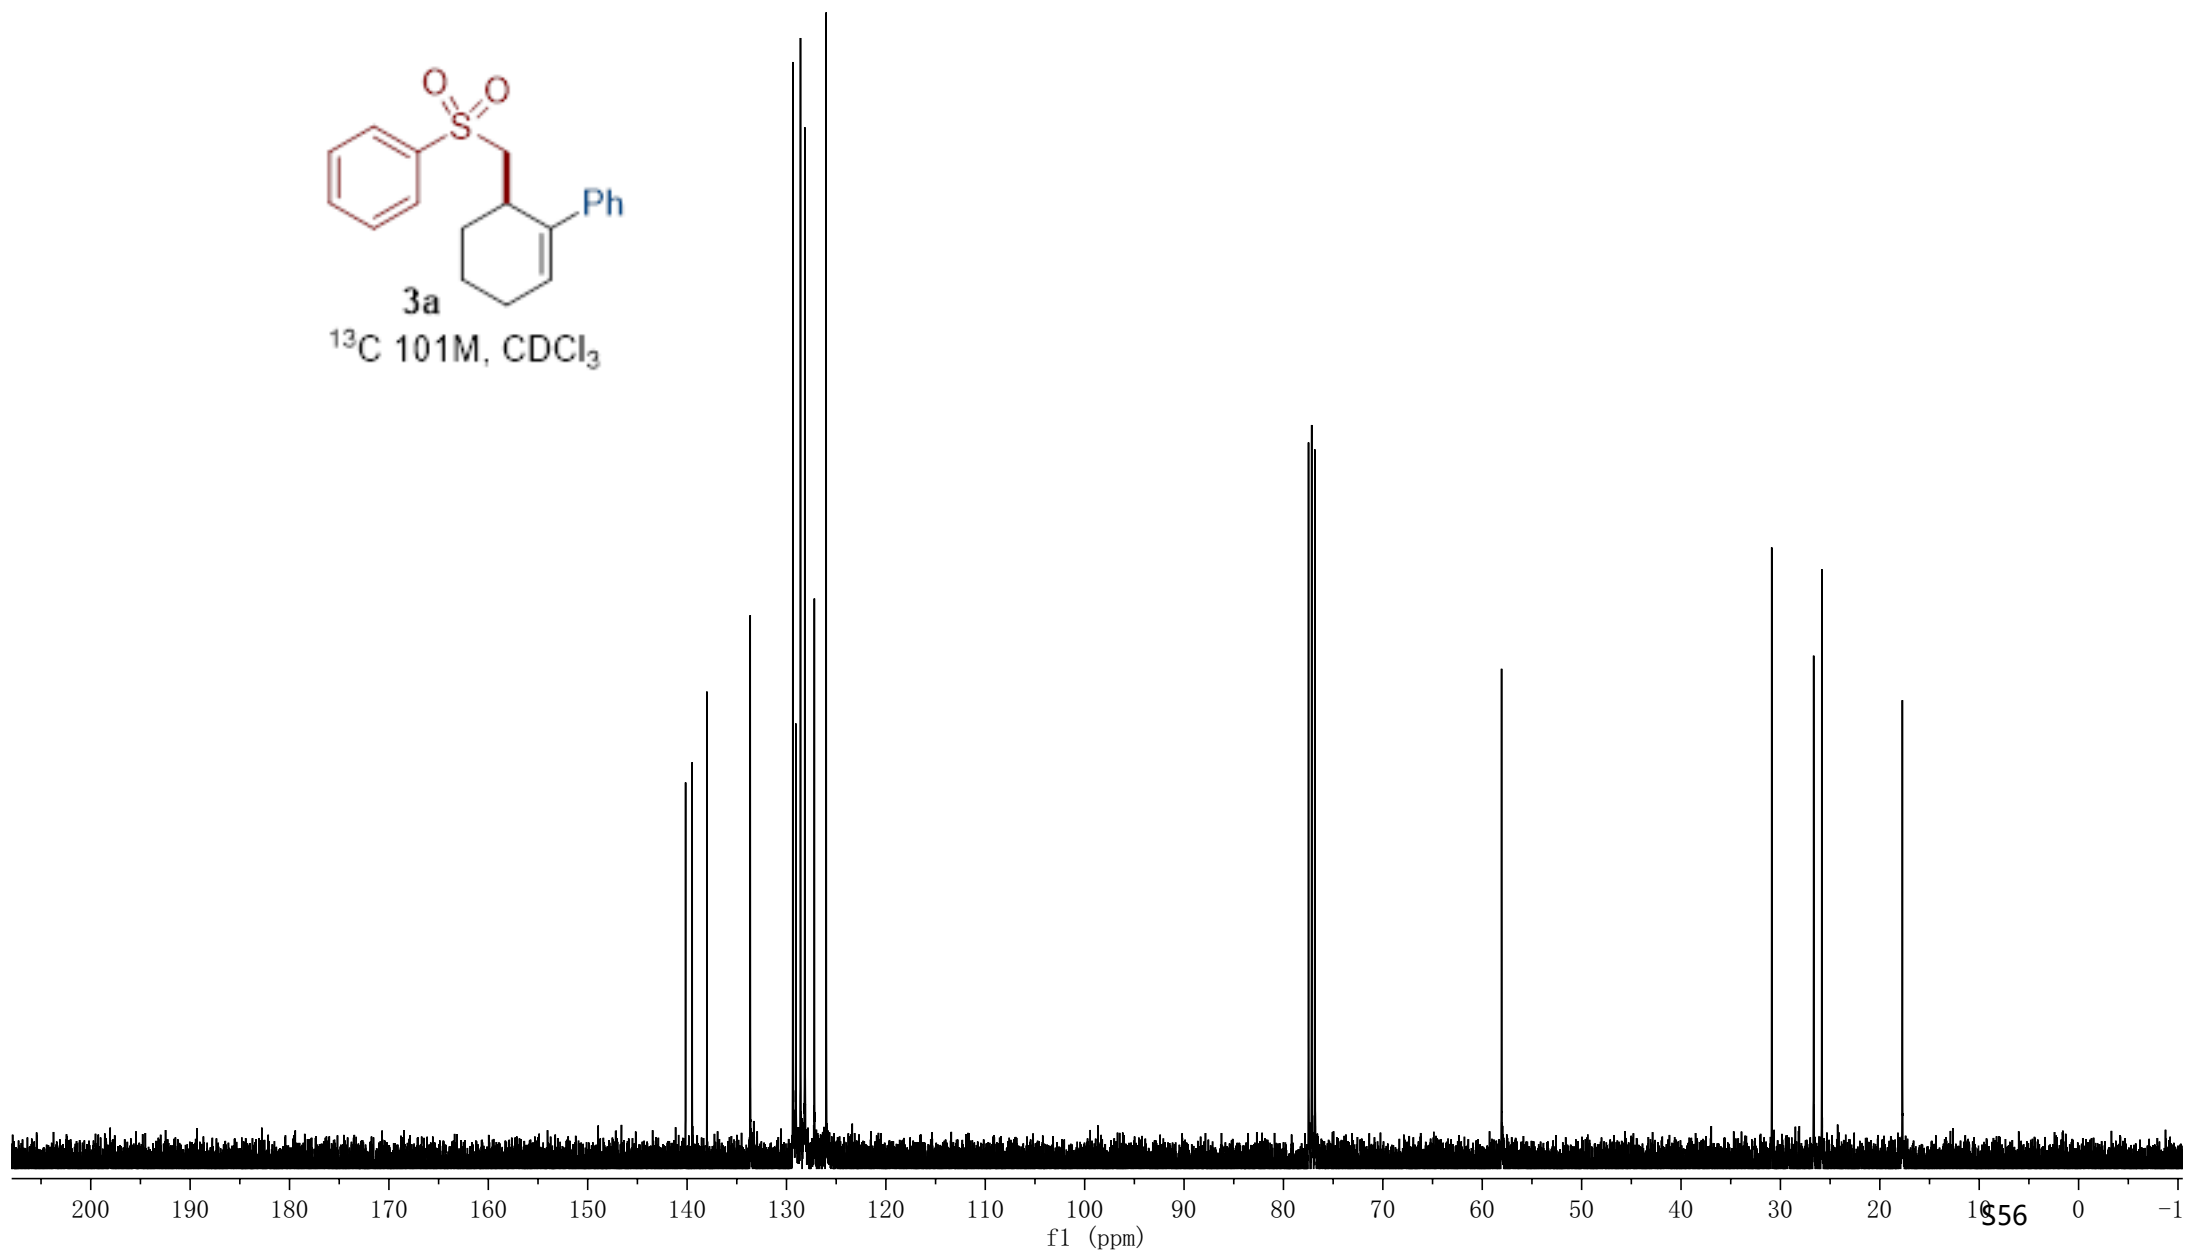



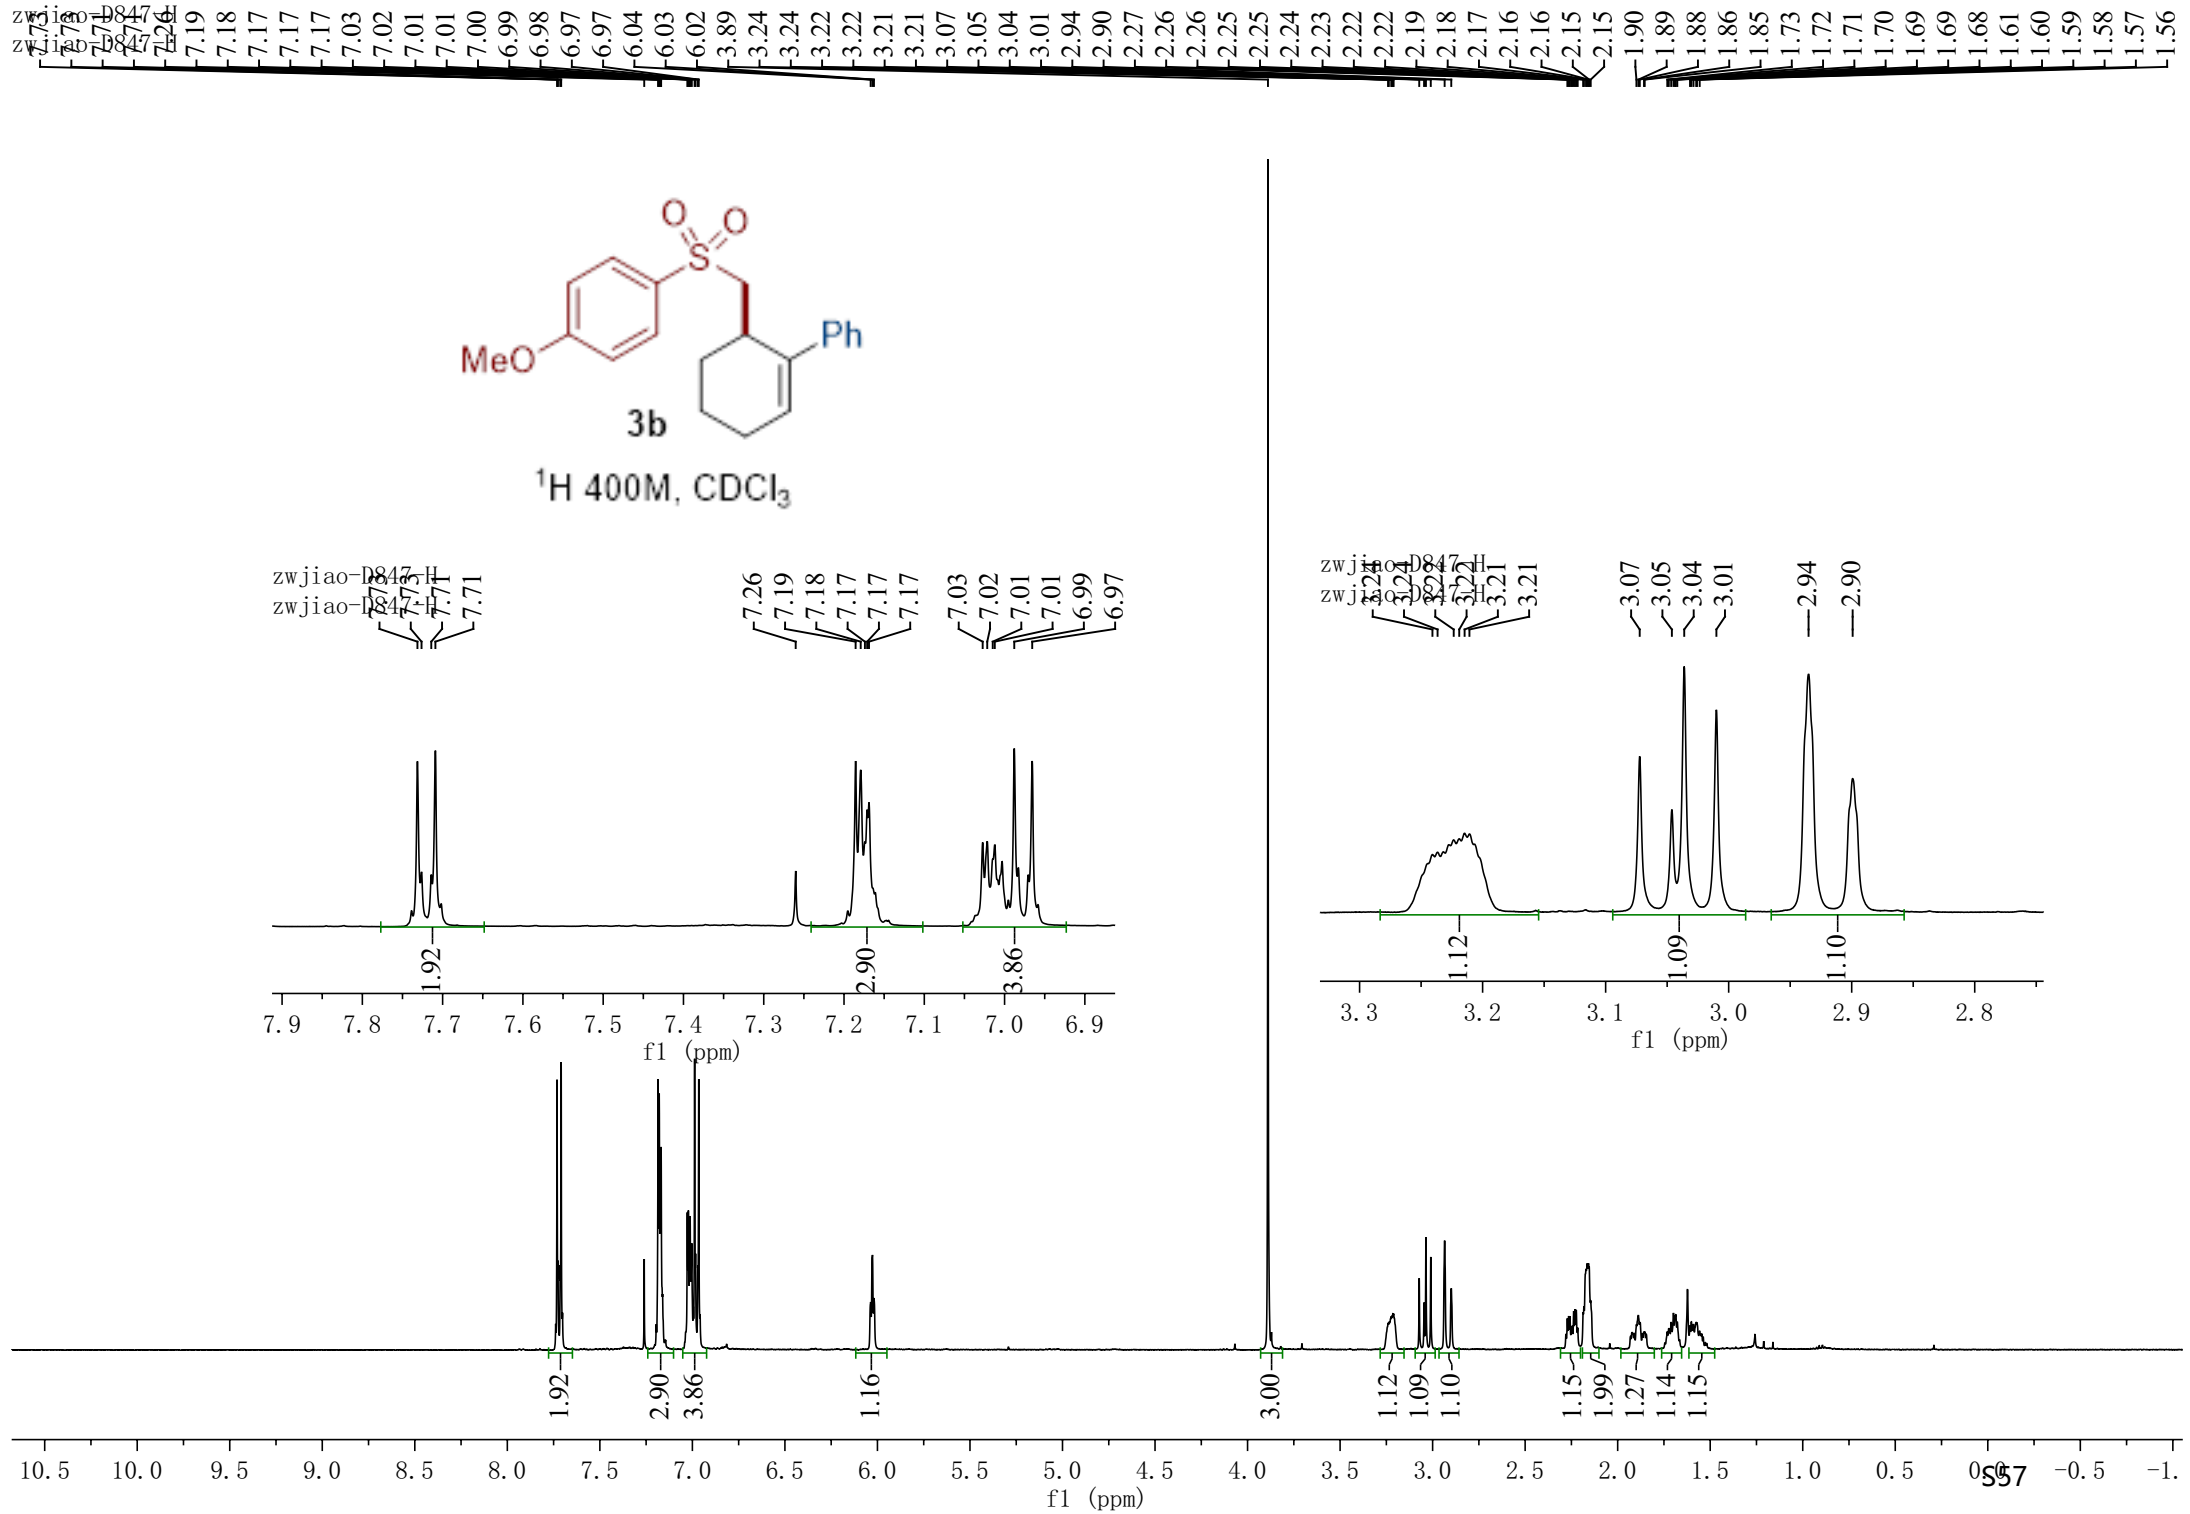

zwjiao-D847-C  
zwjiao-D847-C

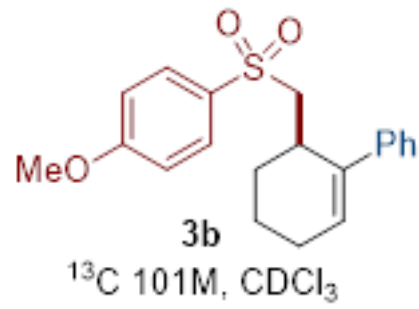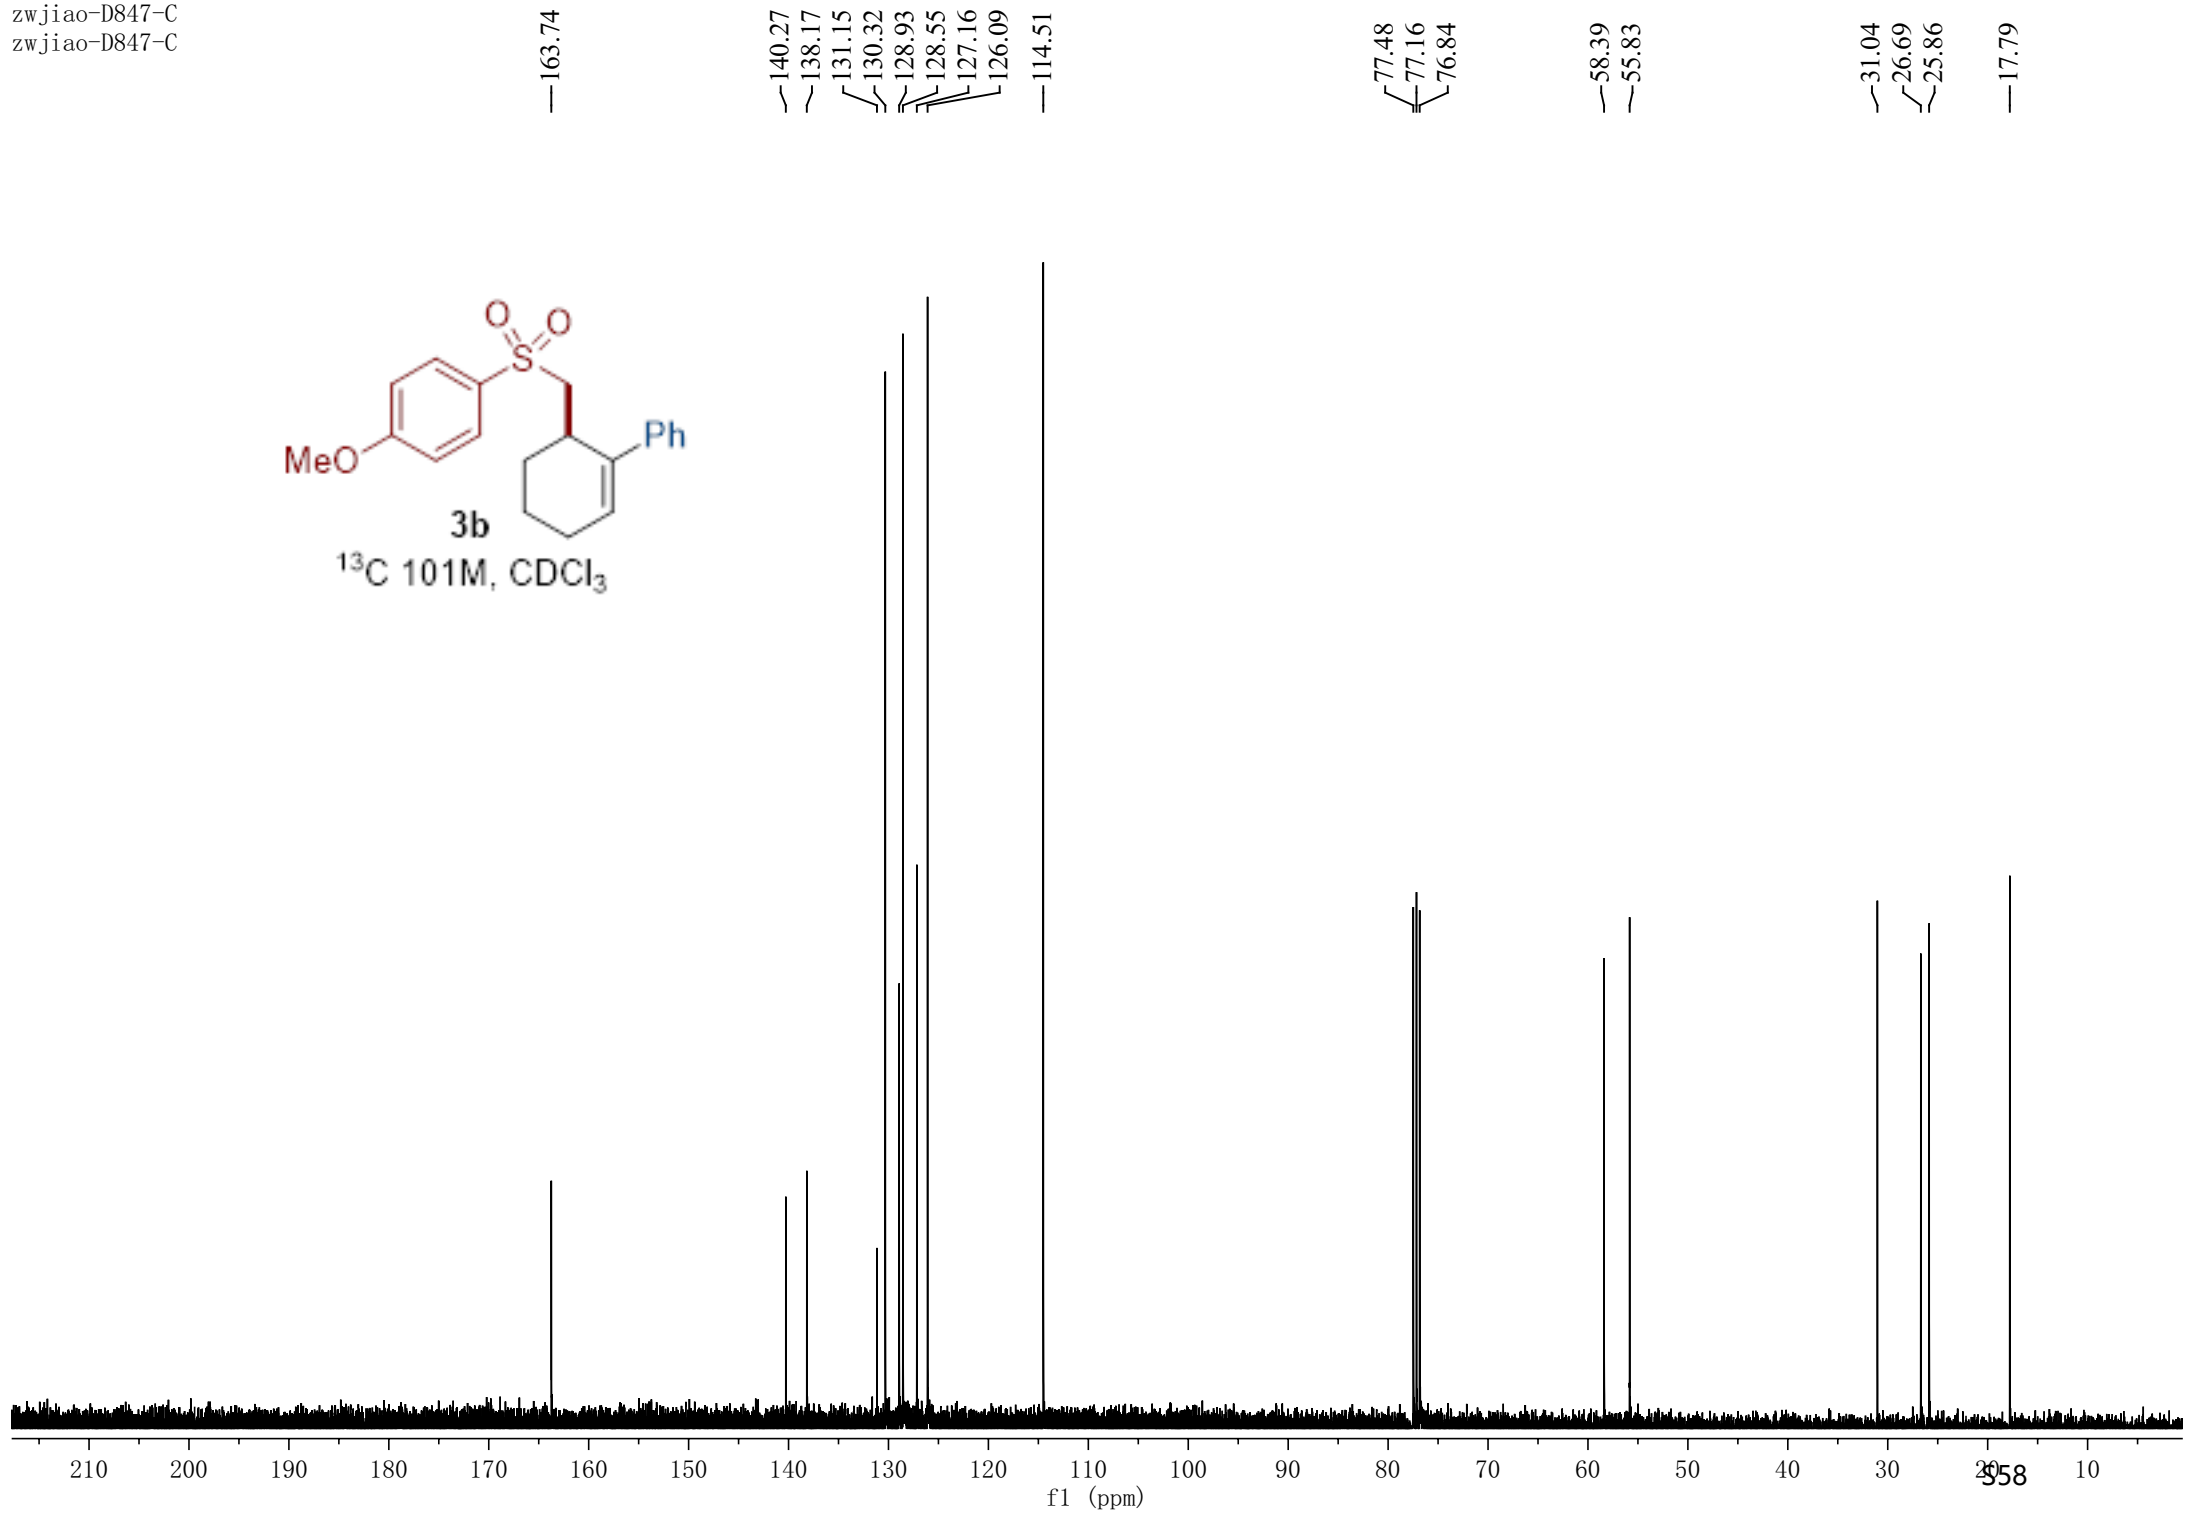

zwjiao-D848-H  
zwjiao-D848-H

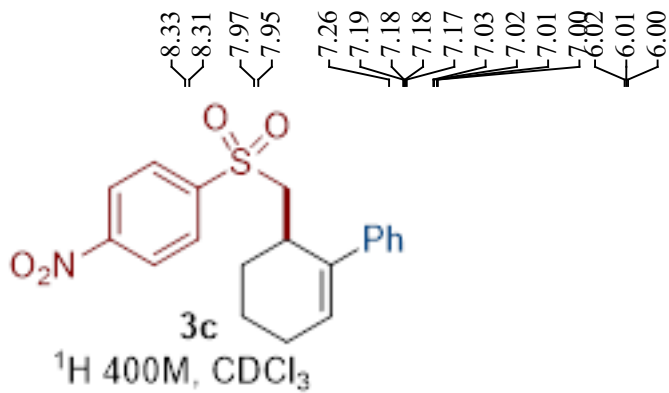

8.33  
8.31  
7.97  
7.95  
7.26  
7.19  
7.18  
7.18  
7.17  
7.03  
7.02  
7.01  
7.00  
6.01  
6.00

3.27  
3.25  
3.25  
3.16  
3.13  
3.12  
3.10  
3.00  
2.96  
2.26  
2.25  
2.24  
2.22  
2.22  
2.21  
2.20  
2.19  
2.18  
2.17  
2.16  
1.94  
1.93  
1.75  
1.74  
1.73  
1.72  
1.72  
1.50

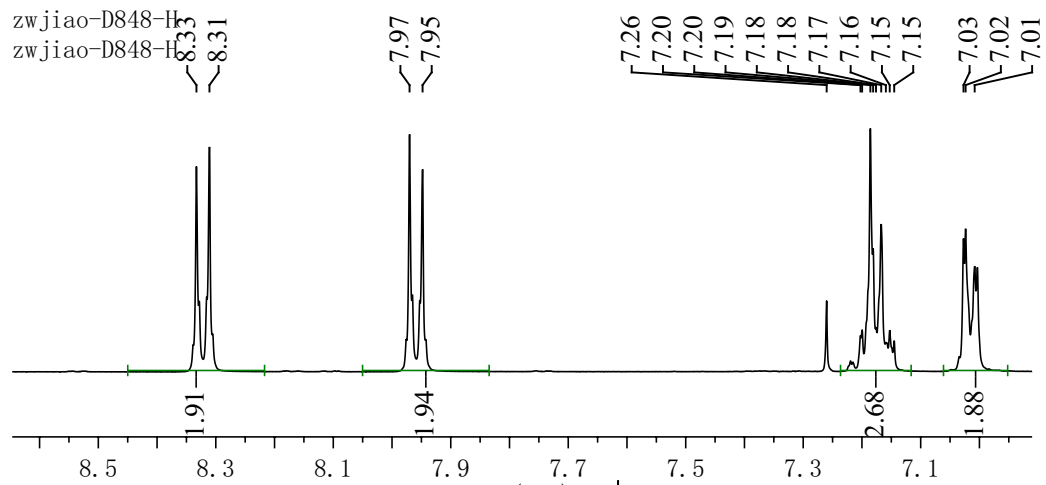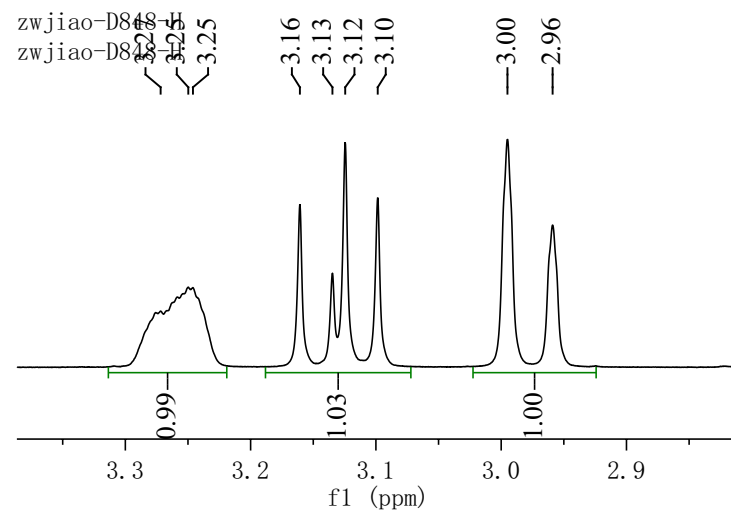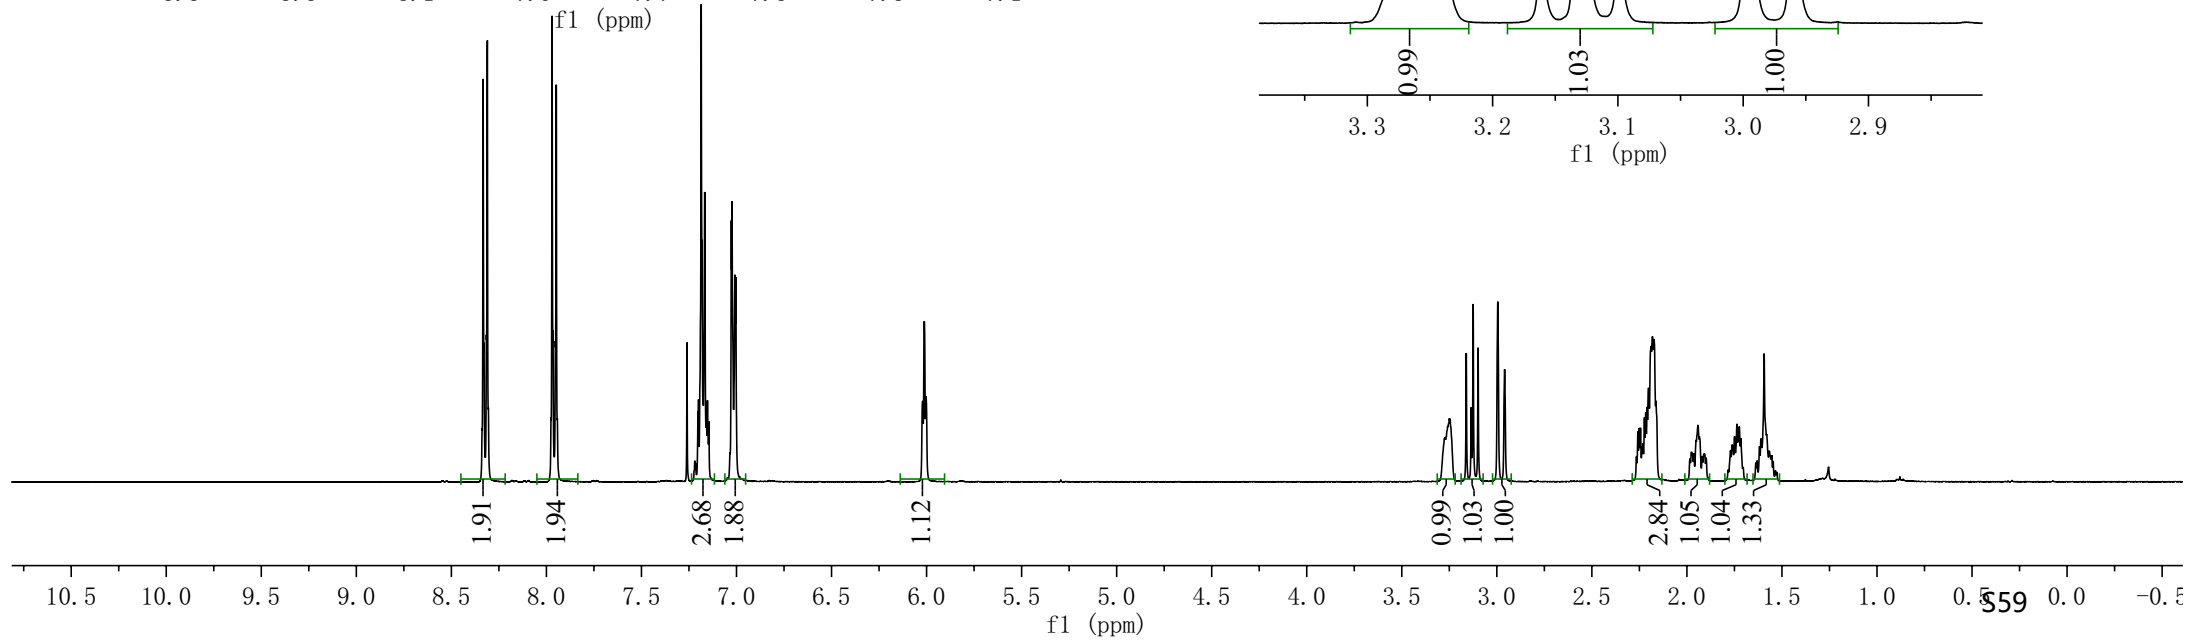

zwjiao-D848-C  
zwjiao-D848-C

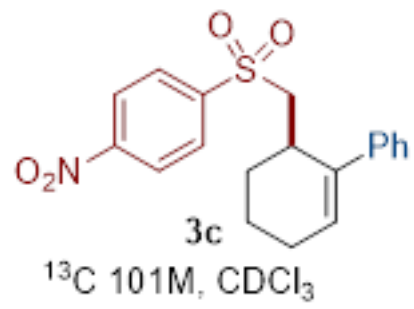

150.81  
145.15  
140.21  
137.73  
129.52  
129.50  
128.64  
127.44  
126.18  
124.51

77.48  
77.16  
76.84

58.11

31.12  
26.91  
25.69

17.63

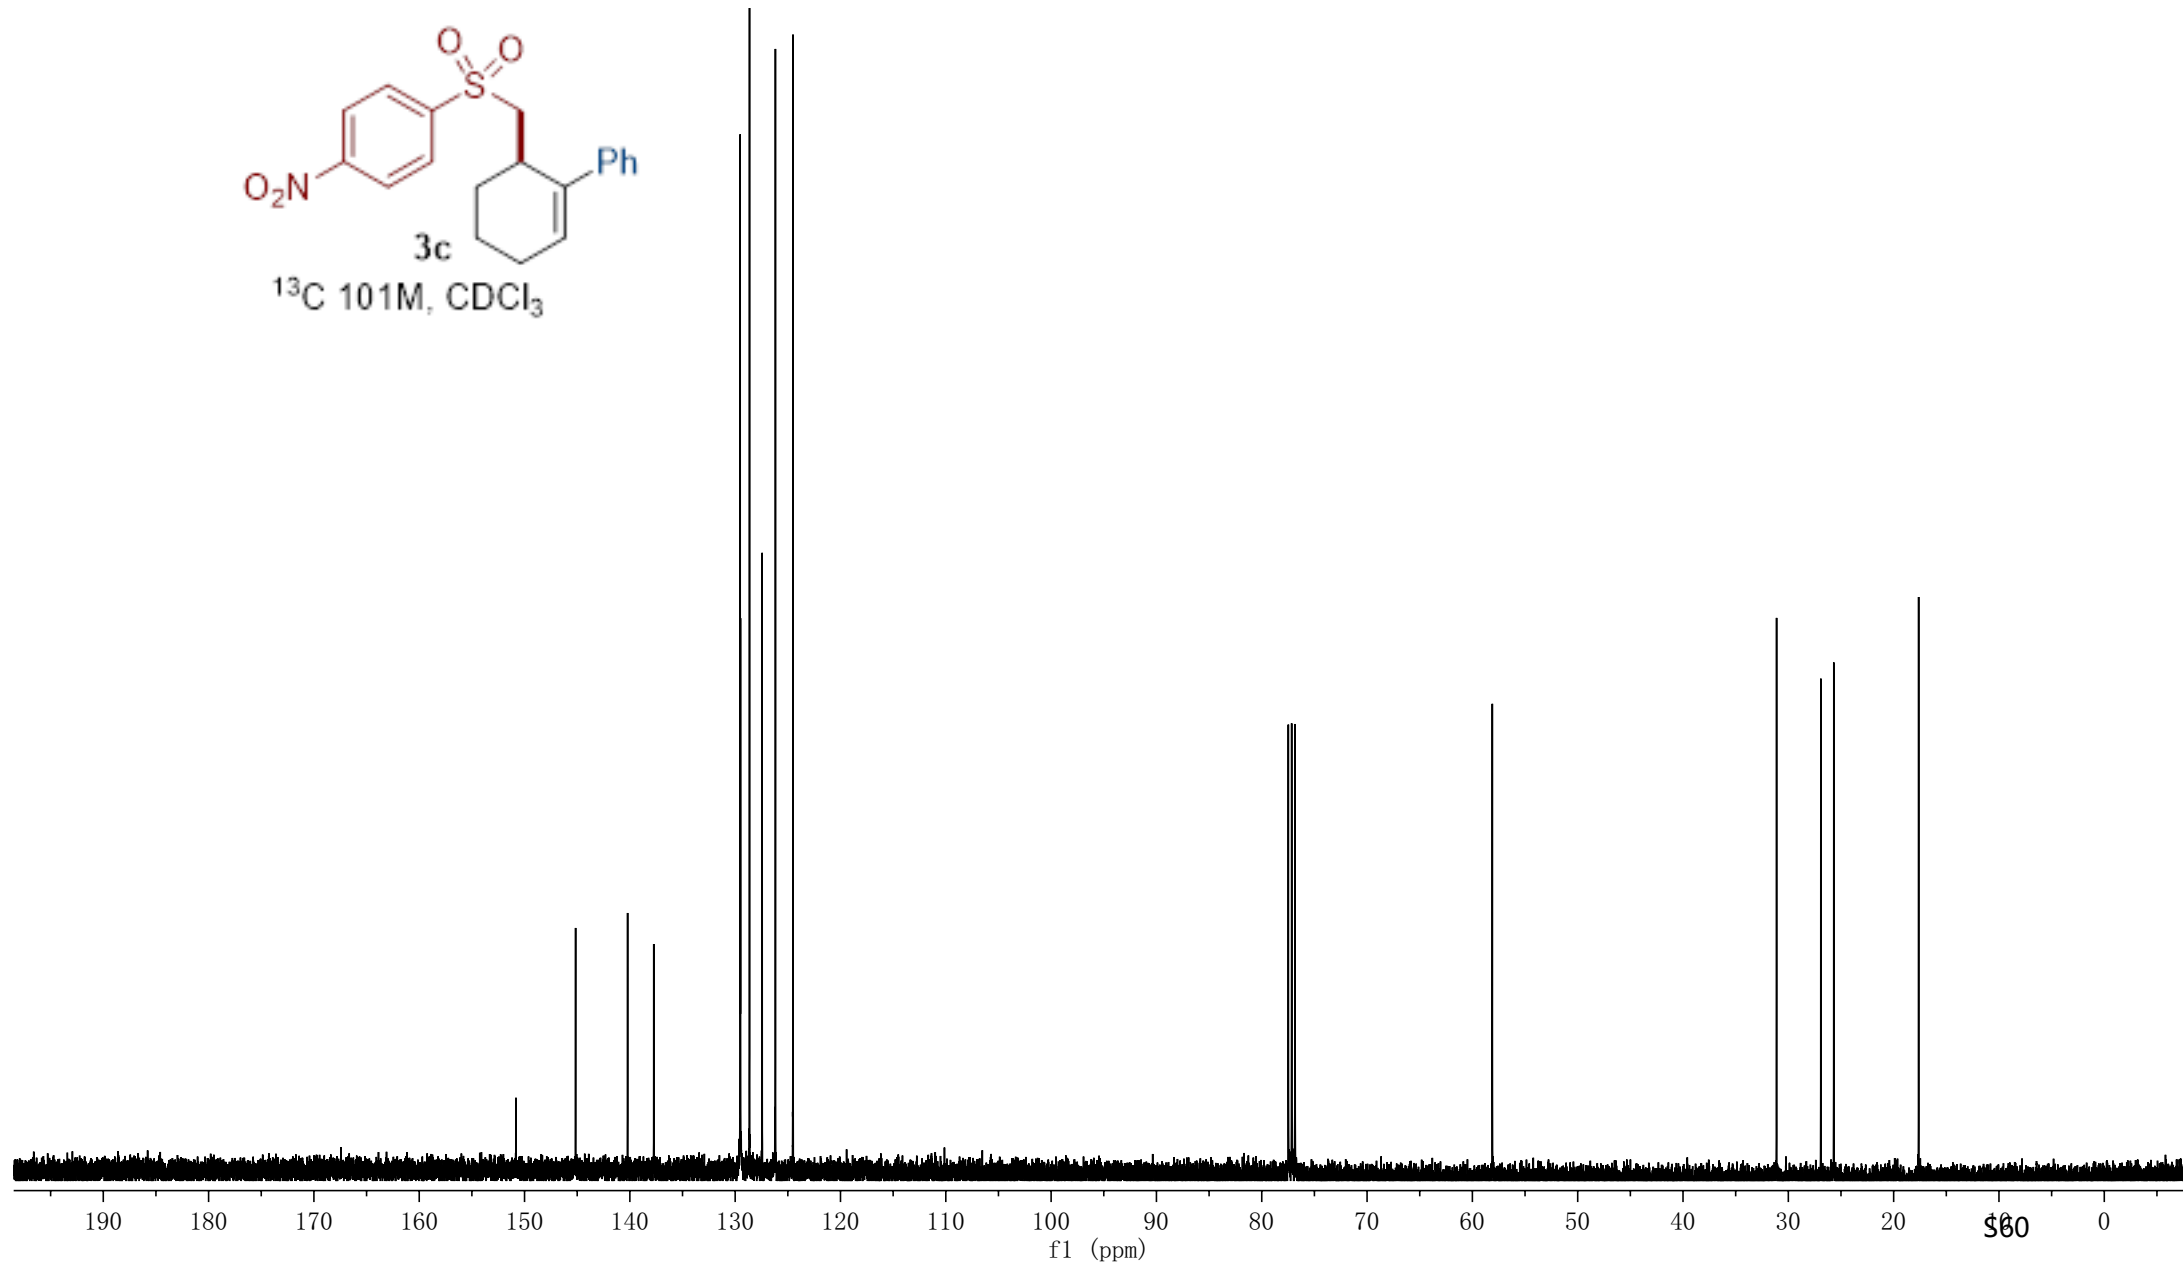

zwjiao-D851-H  
zwjiao-D851-H

7.82  
7.81  
7.80  
7.79  
7.20  
7.19  
7.19  
7.18  
7.17  
7.02  
7.04  
6.03  
6.02

3.25  
3.23  
3.22  
3.10  
3.07  
3.06  
3.04  
2.95  
2.91  
2.27  
2.26  
2.24  
2.24  
2.23  
2.19  
2.17  
2.17  
2.16  
2.16  
1.91  
1.90  
1.73  
1.72  
1.71  
1.70  
1.59  
1.58  
1.58

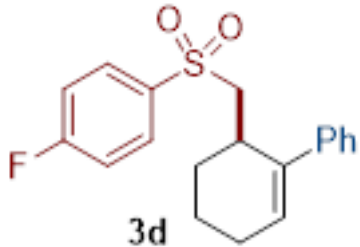

<sup>1</sup>H 400M, CDCl<sub>3</sub>

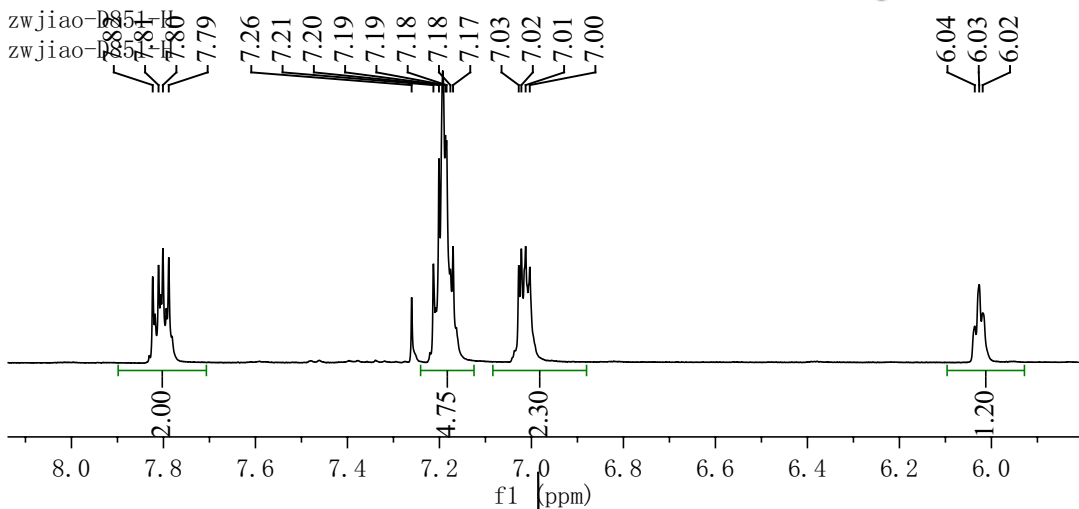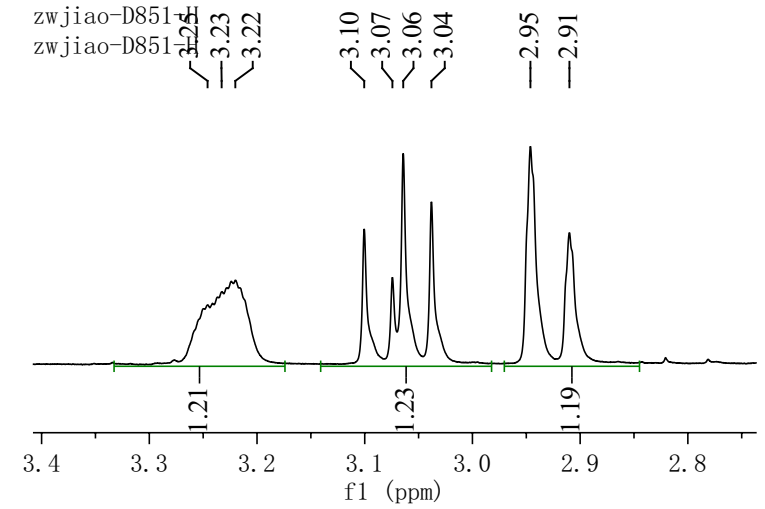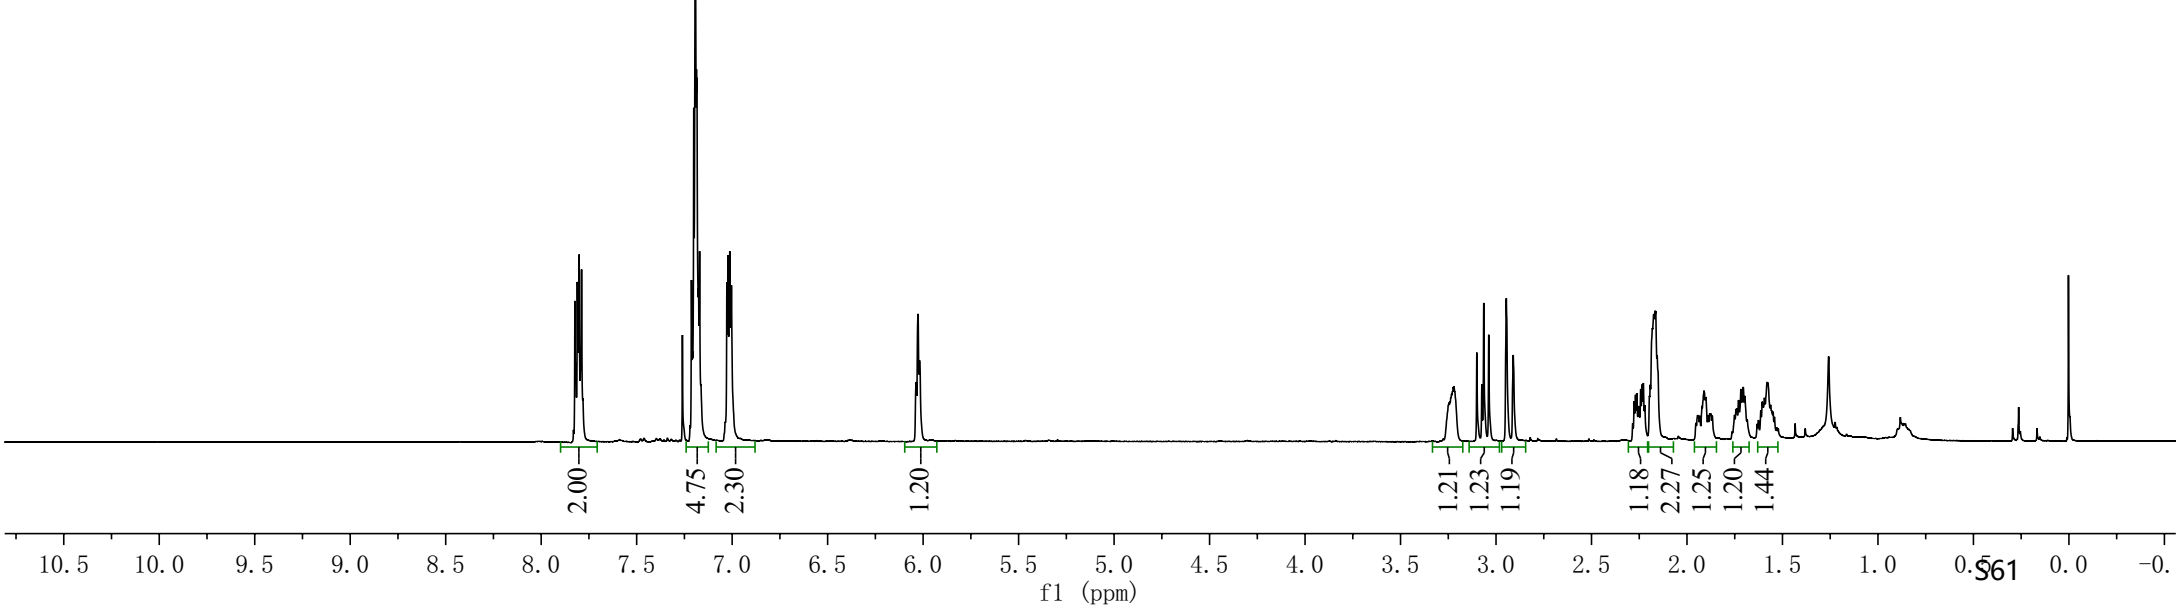

zwjiao-D851-F  
zwjiao-D851-F

---104.15

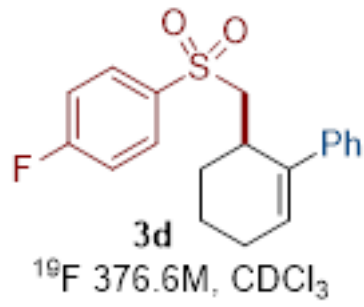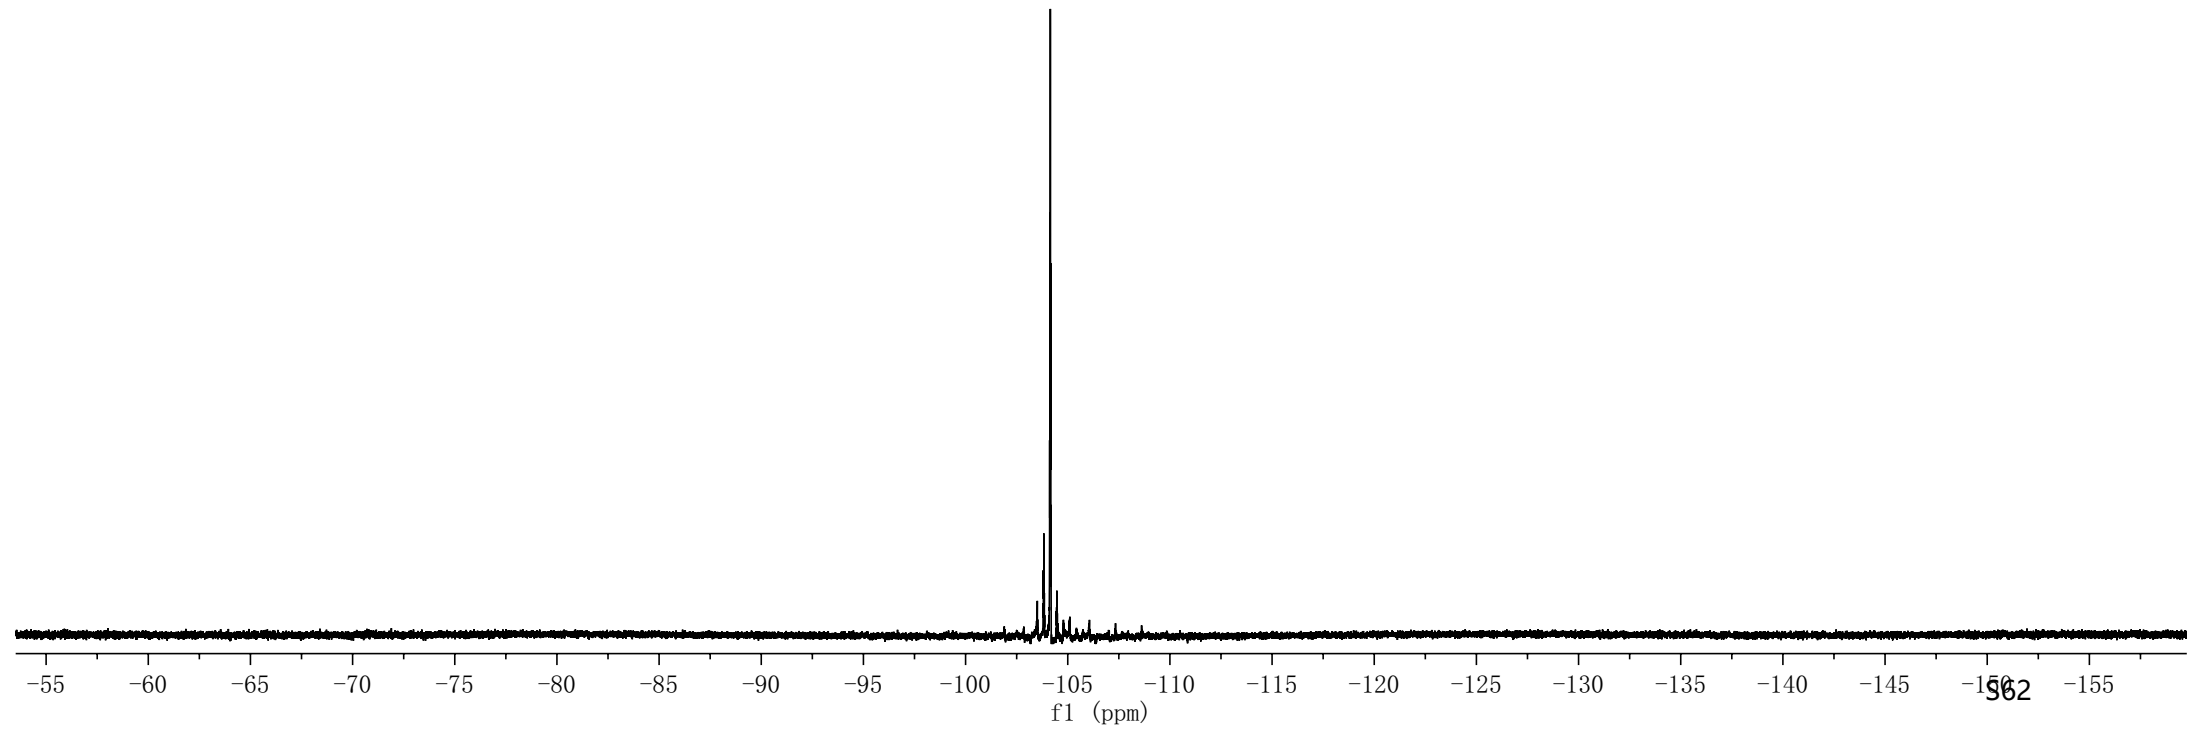

zwjiao-D851-C  
zwjiao-D851-C

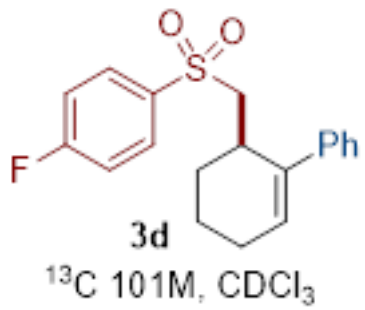

167.14  
164.60  
140.27  
138.01  
135.68  
135.65  
131.06  
130.97  
129.20  
128.62  
127.31  
126.11  
116.76  
116.54

77.48  
77.16  
76.84

58.30

31.07  
26.76  
25.82

17.73

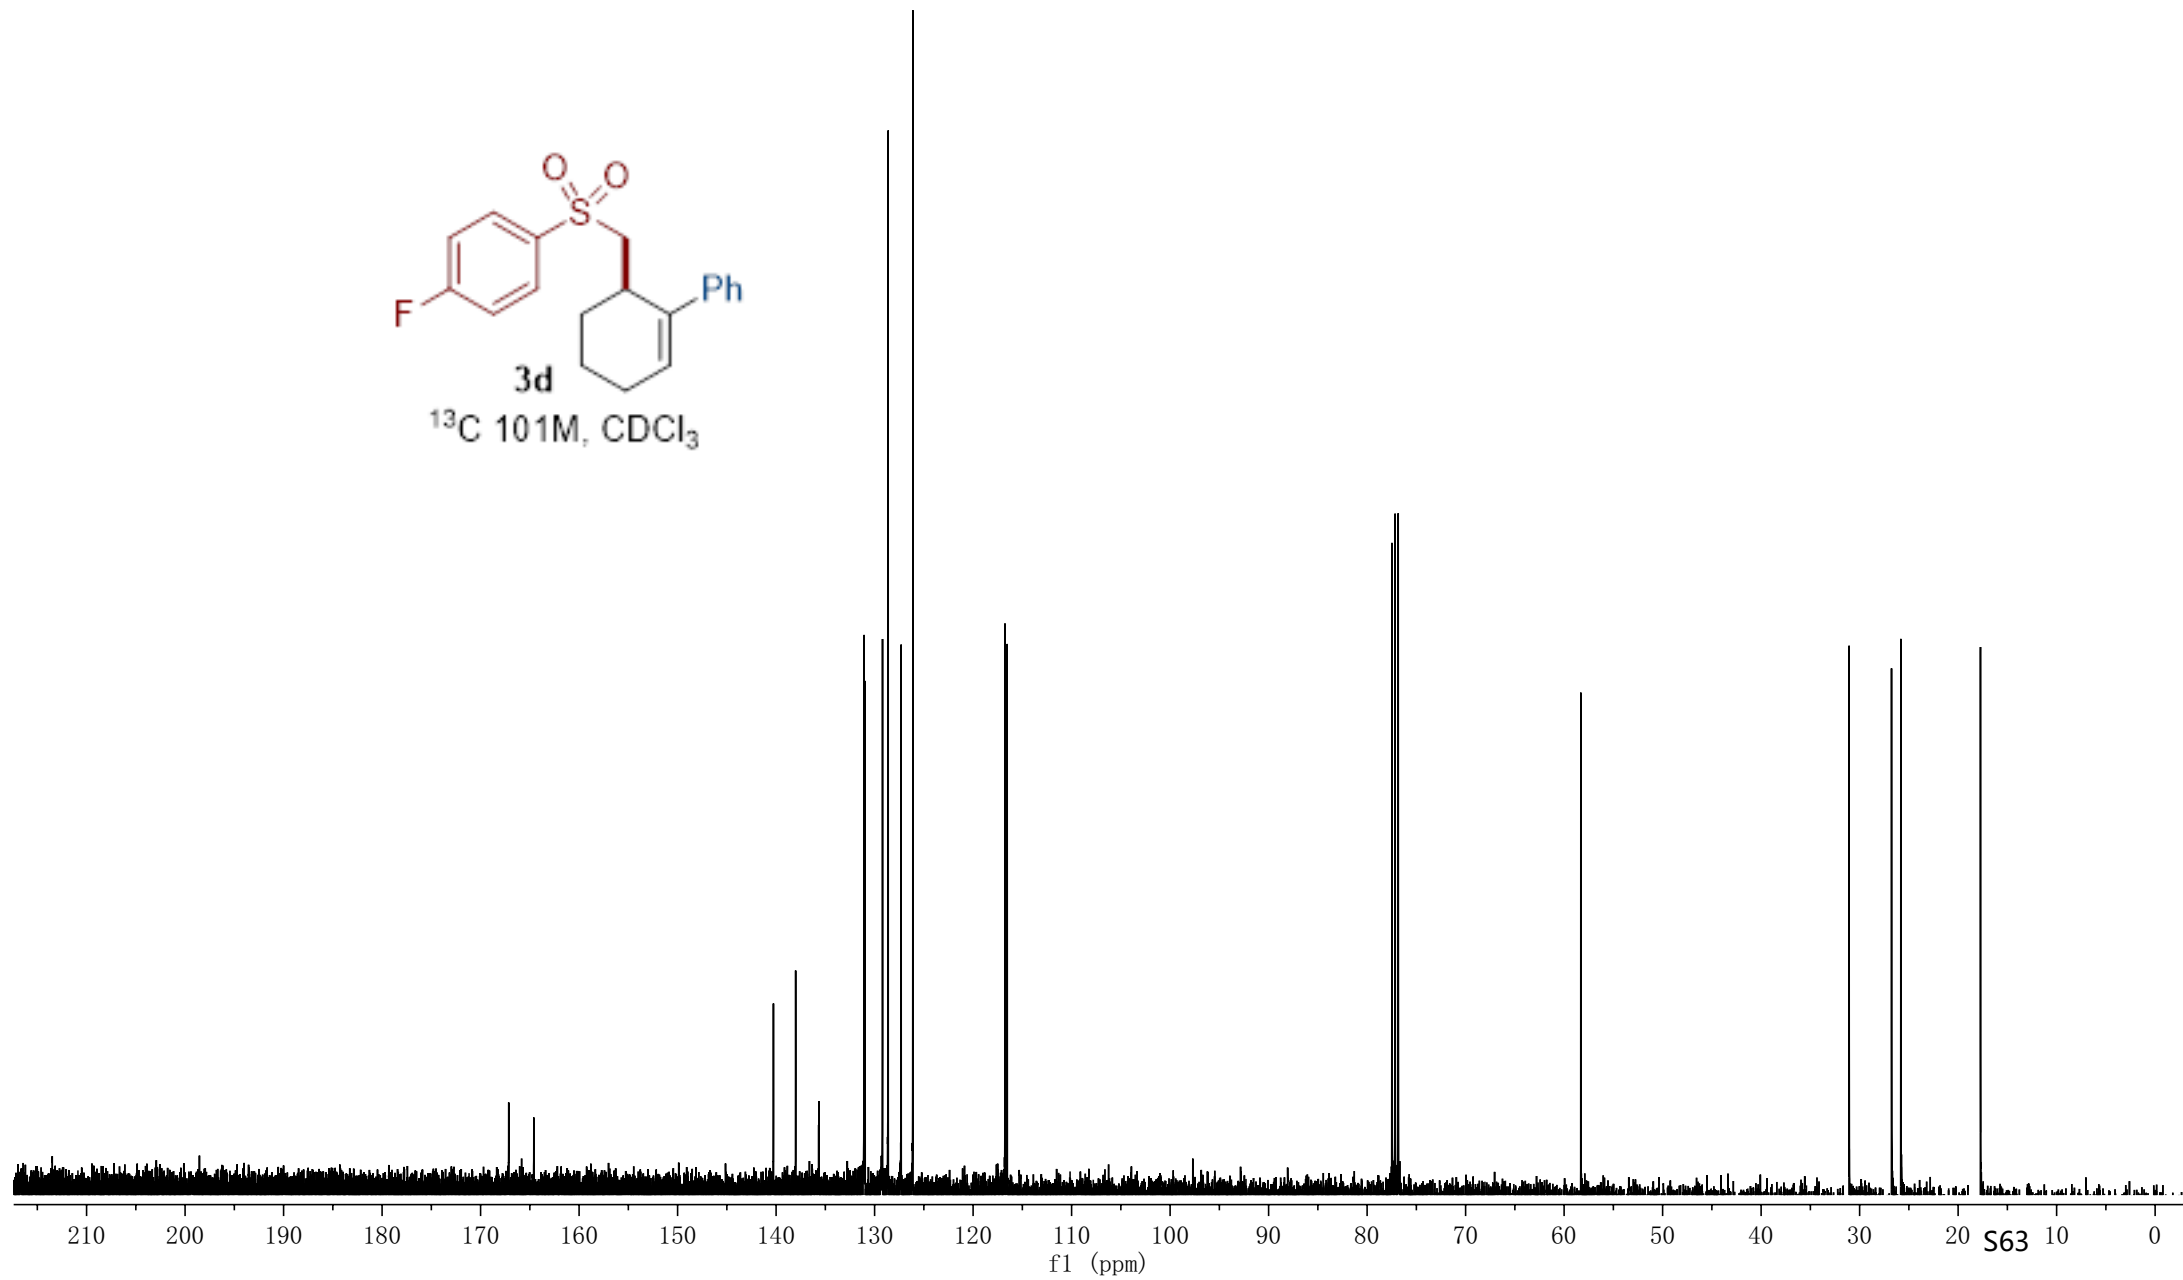

zwjiao-D862-H  
zwjiao-D862-H

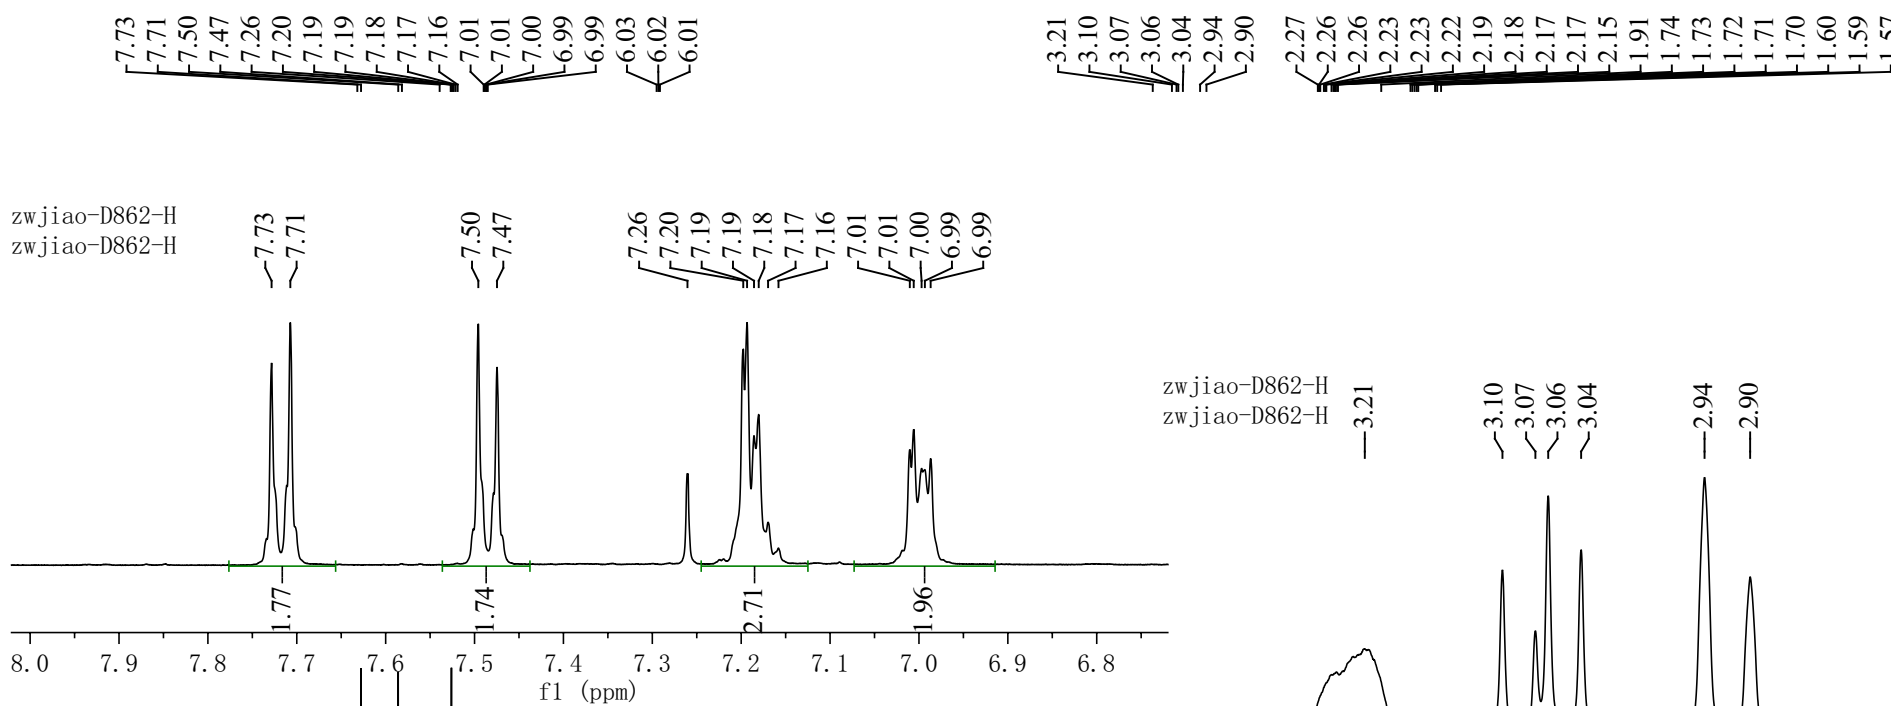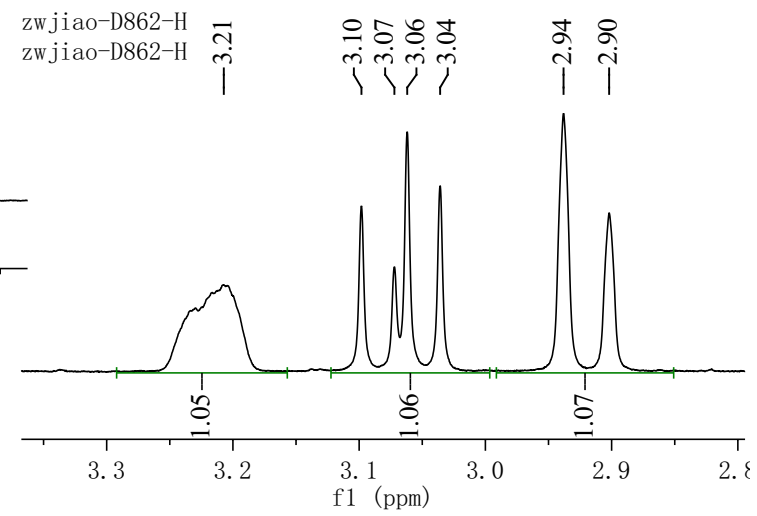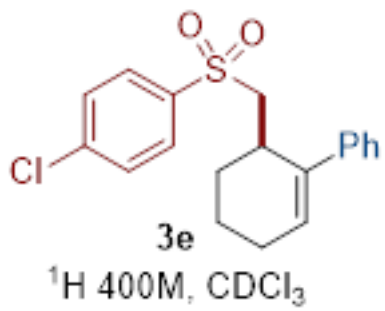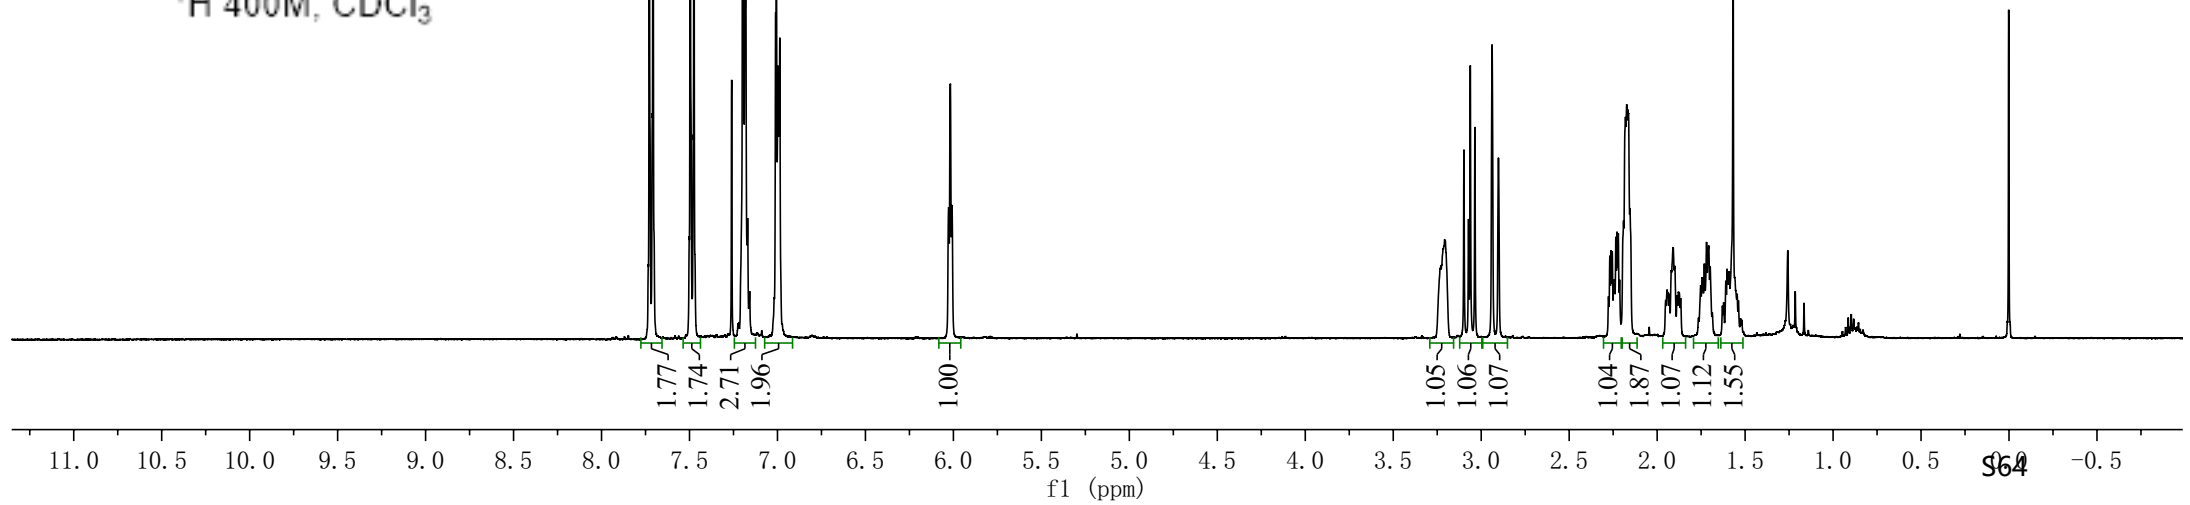



zwjiao-D862-C  
zwjiao-D862-C

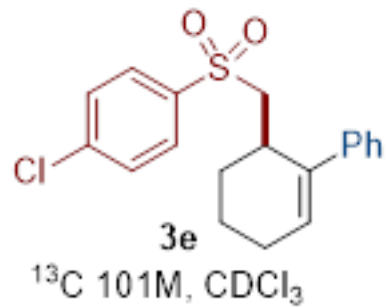

140.46  
140.25  
138.00  
129.69  
129.66  
129.66  
129.21  
128.63  
127.31  
126.13

77.48  
77.16  
76.84

58.23

31.08  
26.79  
25.80

17.71

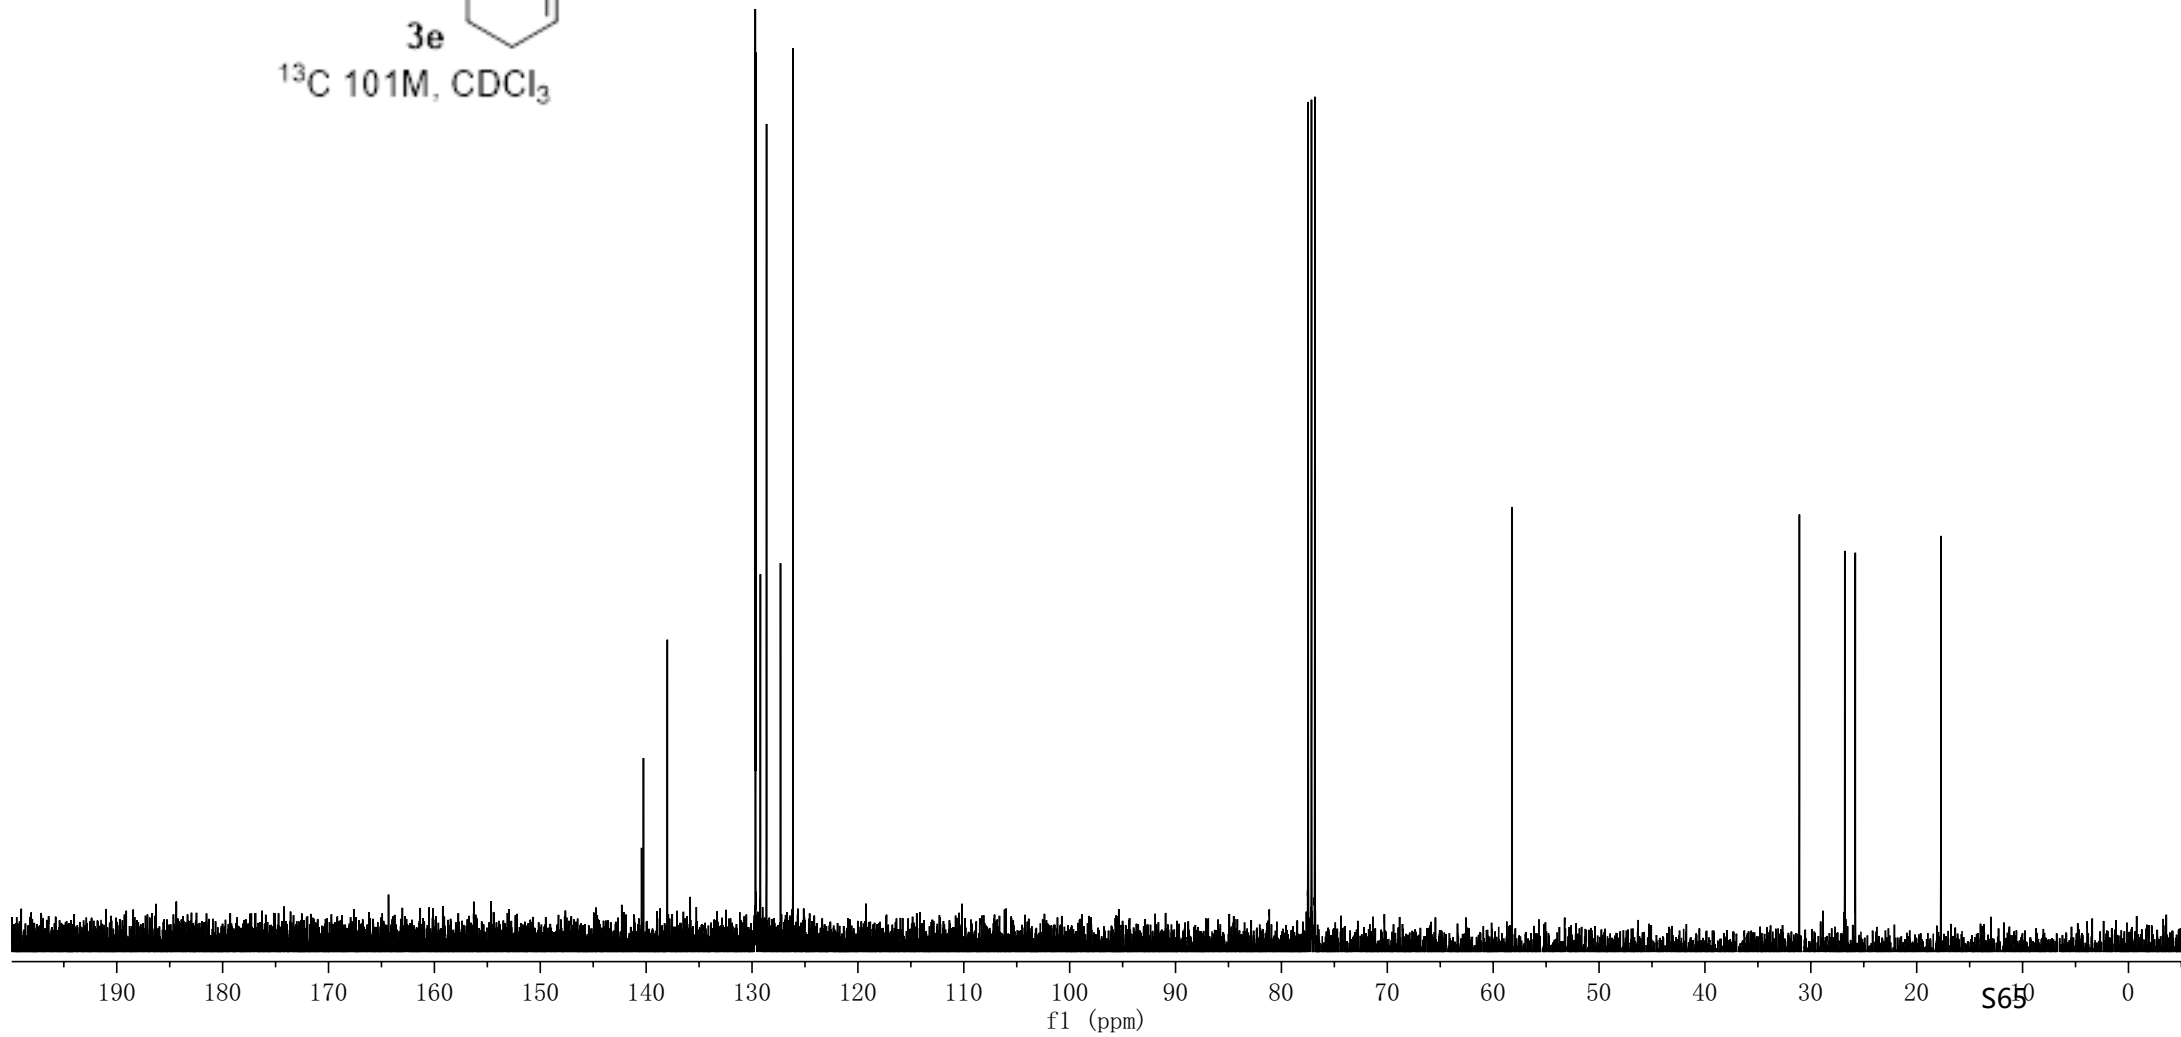

8.40, 8.39, 8.38, 7.97, 7.96, 7.95, 7.94, 7.75, 7.75, 7.73, 7.73, 7.72, 7.71, 7.70, 7.69, 7.68, 7.67, 7.66, 7.66, 7.64, 7.64, 7.62, 7.62, 7.26, 7.11, 7.09, 7.08, 7.08, 7.01, 6.99, 6.97, 6.92, 6.92, 6.90, 6.90, 6.02, 6.01, 6.00, 3.28, 3.26, 3.25, 3.18, 3.15, 3.14, 3.11, 3.05, 3.01, 2.34, 2.33, 2.32, 2.31, 2.30, 2.30, 2.29, 2.18, 2.17, 2.17, 2.16, 2.15, 2.15, 1.94, 1.93, 1.92, 1.73, 1.72, 1.70, 1.70, 1.62, 1.61, 1.60, 1.59

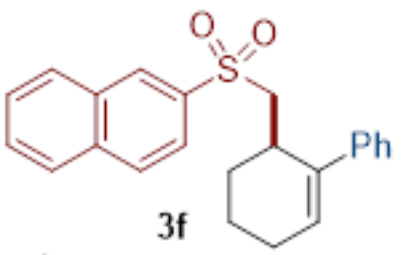

$^1\text{H}$  400M,  $\text{CDCl}_3$

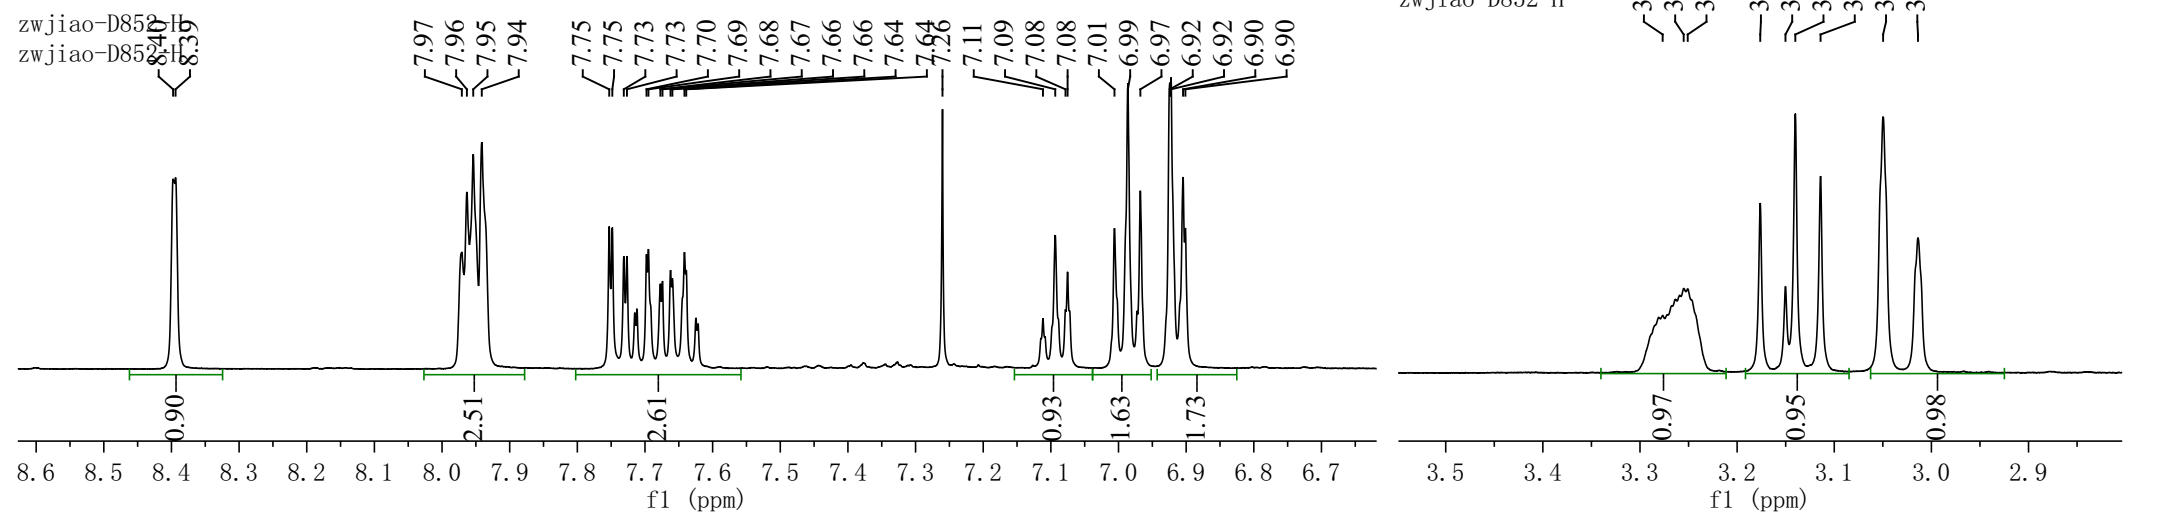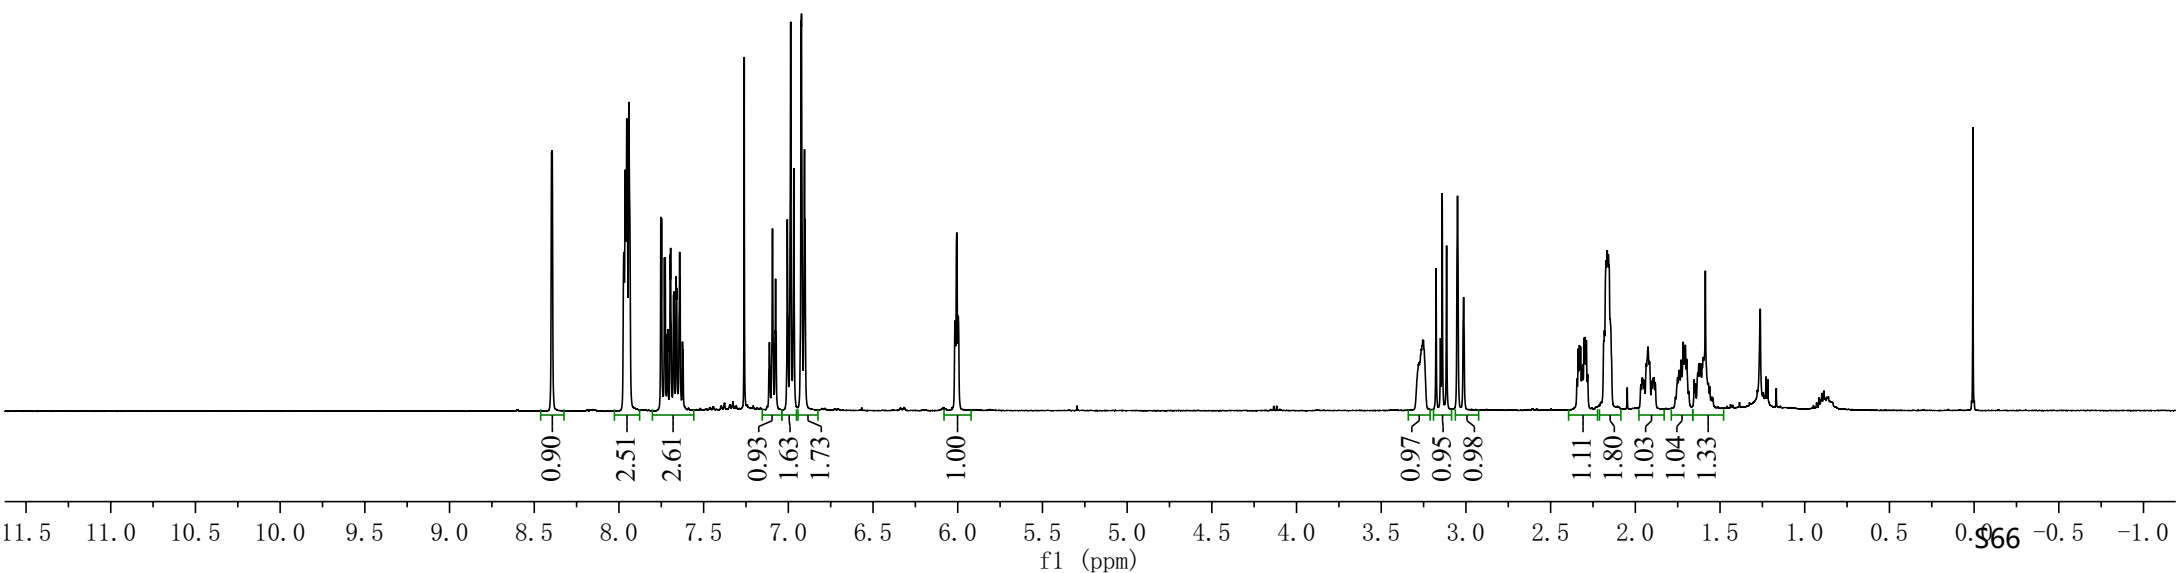

zwjiao-D852-C  
zwjiao-D852-C

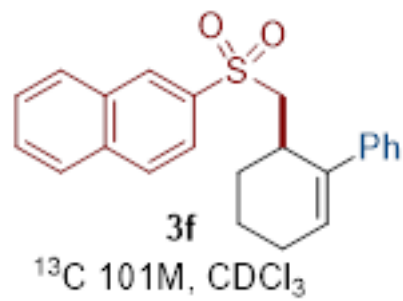

140.17  
138.14  
136.33  
135.37  
132.32  
129.92  
129.64  
129.58  
129.38  
129.00  
128.46  
128.07  
127.80  
127.14  
126.04  
122.94

77.48  
77.16  
76.84

58.19

31.08  
26.78  
25.85

17.77

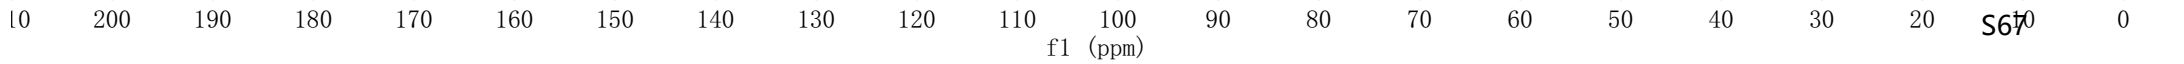

7.73, 7.70, 7.69, 7.68, 7.68, 7.66, 7.66, 7.26, 7.17, 7.17, 7.16, 7.15, 7.14, 7.13, 7.12, 7.11, 7.03, 7.03, 7.02, 7.01, 7.01, 6.45, 6.44, 6.01, 6.00, 6.00, 3.28, 3.26, 3.14, 3.11, 3.10, 3.10, 3.09, 3.08, 3.08, 3.00, 2.96, 2.96, 2.49, 2.49, 2.24, 2.24, 2.23, 2.22, 2.22, 2.21, 2.20, 2.20, 2.19, 2.18, 2.17, 2.17, 2.16, 2.15, 1.97, 1.95, 1.93, 1.92, 1.91, 1.90, 1.75, 1.74, 1.73, 1.72, 1.71, 1.70, 1.62, 1.61, 1.60, 1.58, 1.56, 1.55

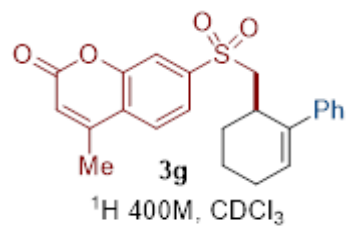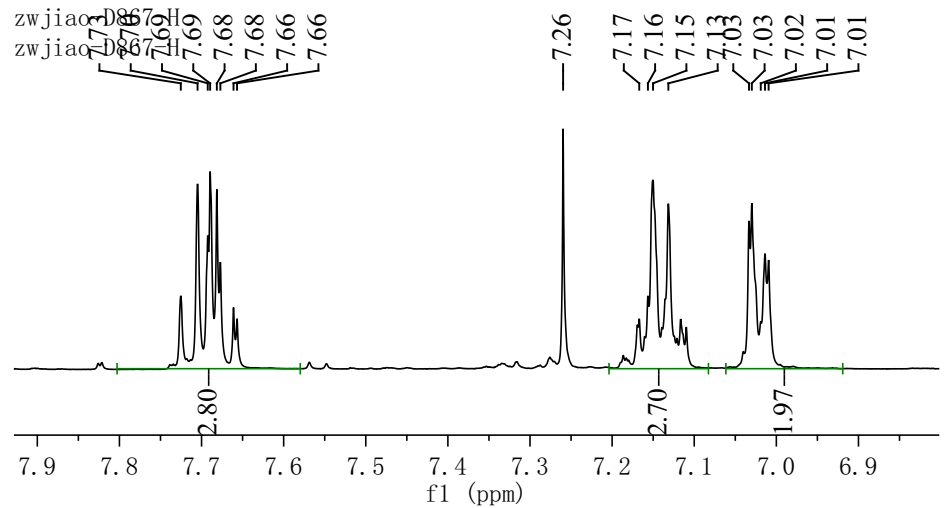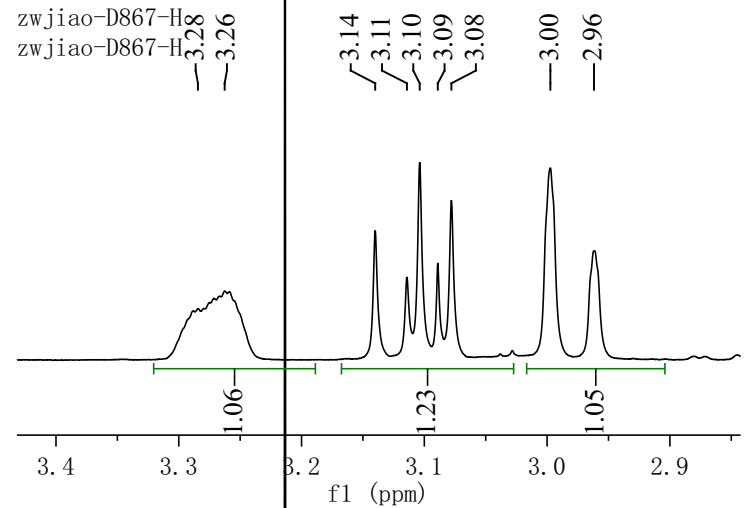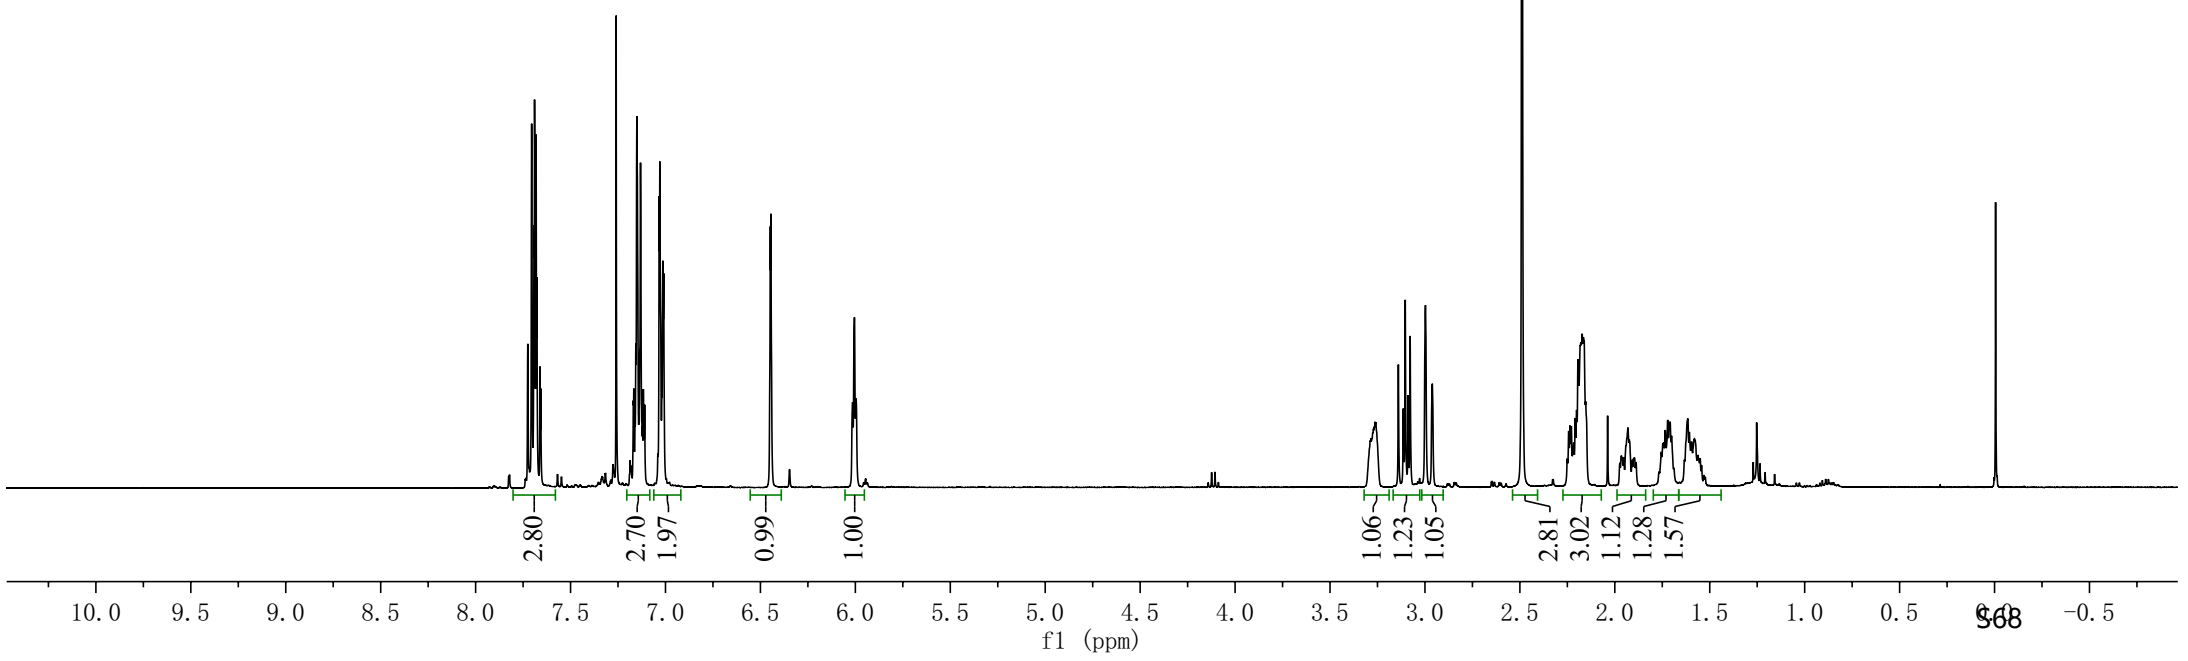

zwjiao-D867-C  
zwjiao-D867-C

159.33  
153.36  
151.01  
142.33  
140.25  
137.88  
129.31  
128.54  
127.31  
126.17  
125.86  
123.98  
123.15  
118.02  
117.06

77.48  
77.16  
76.84

58.22

31.14  
26.93  
25.73  
18.89  
17.71

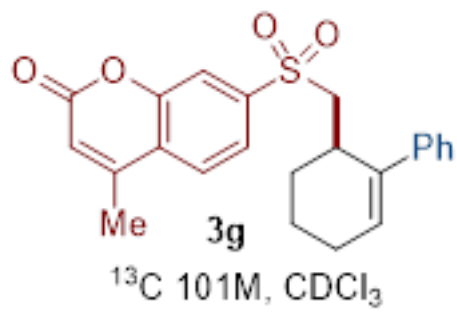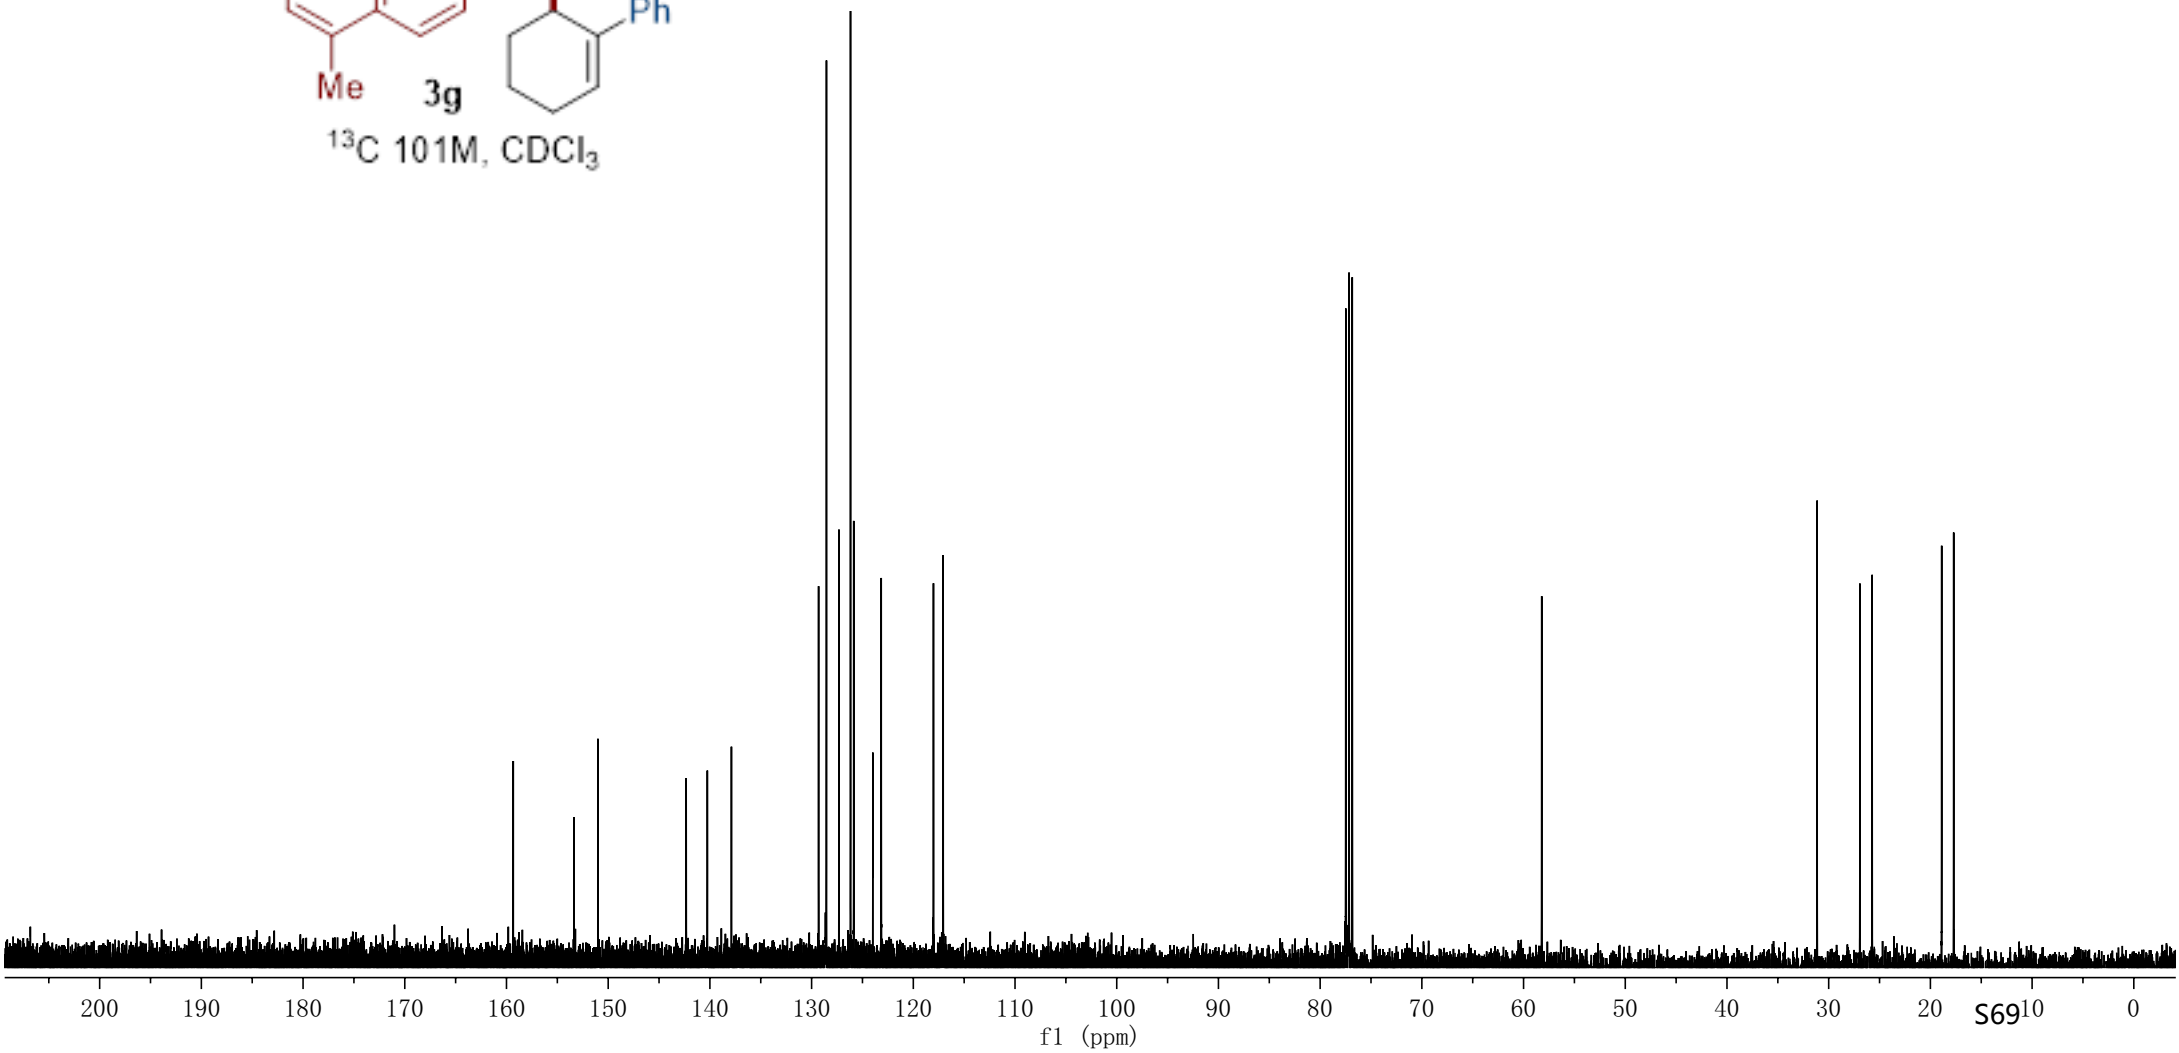

zwjiao-D783-H  
zwjiao-D783-H

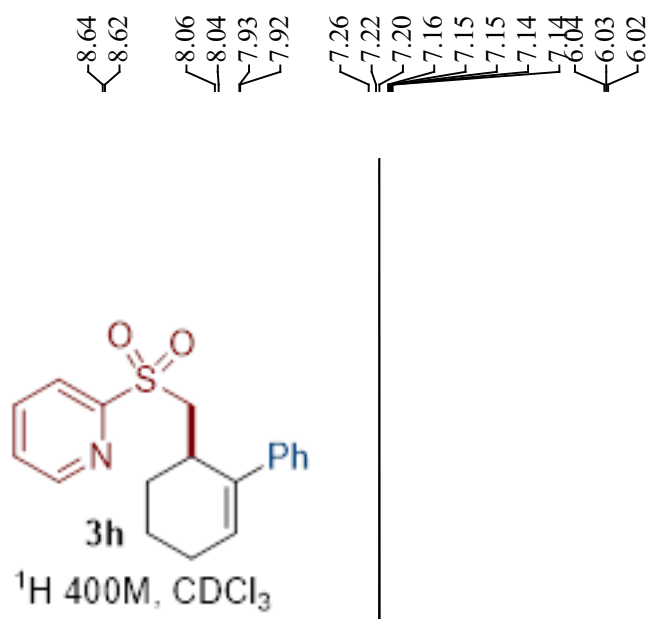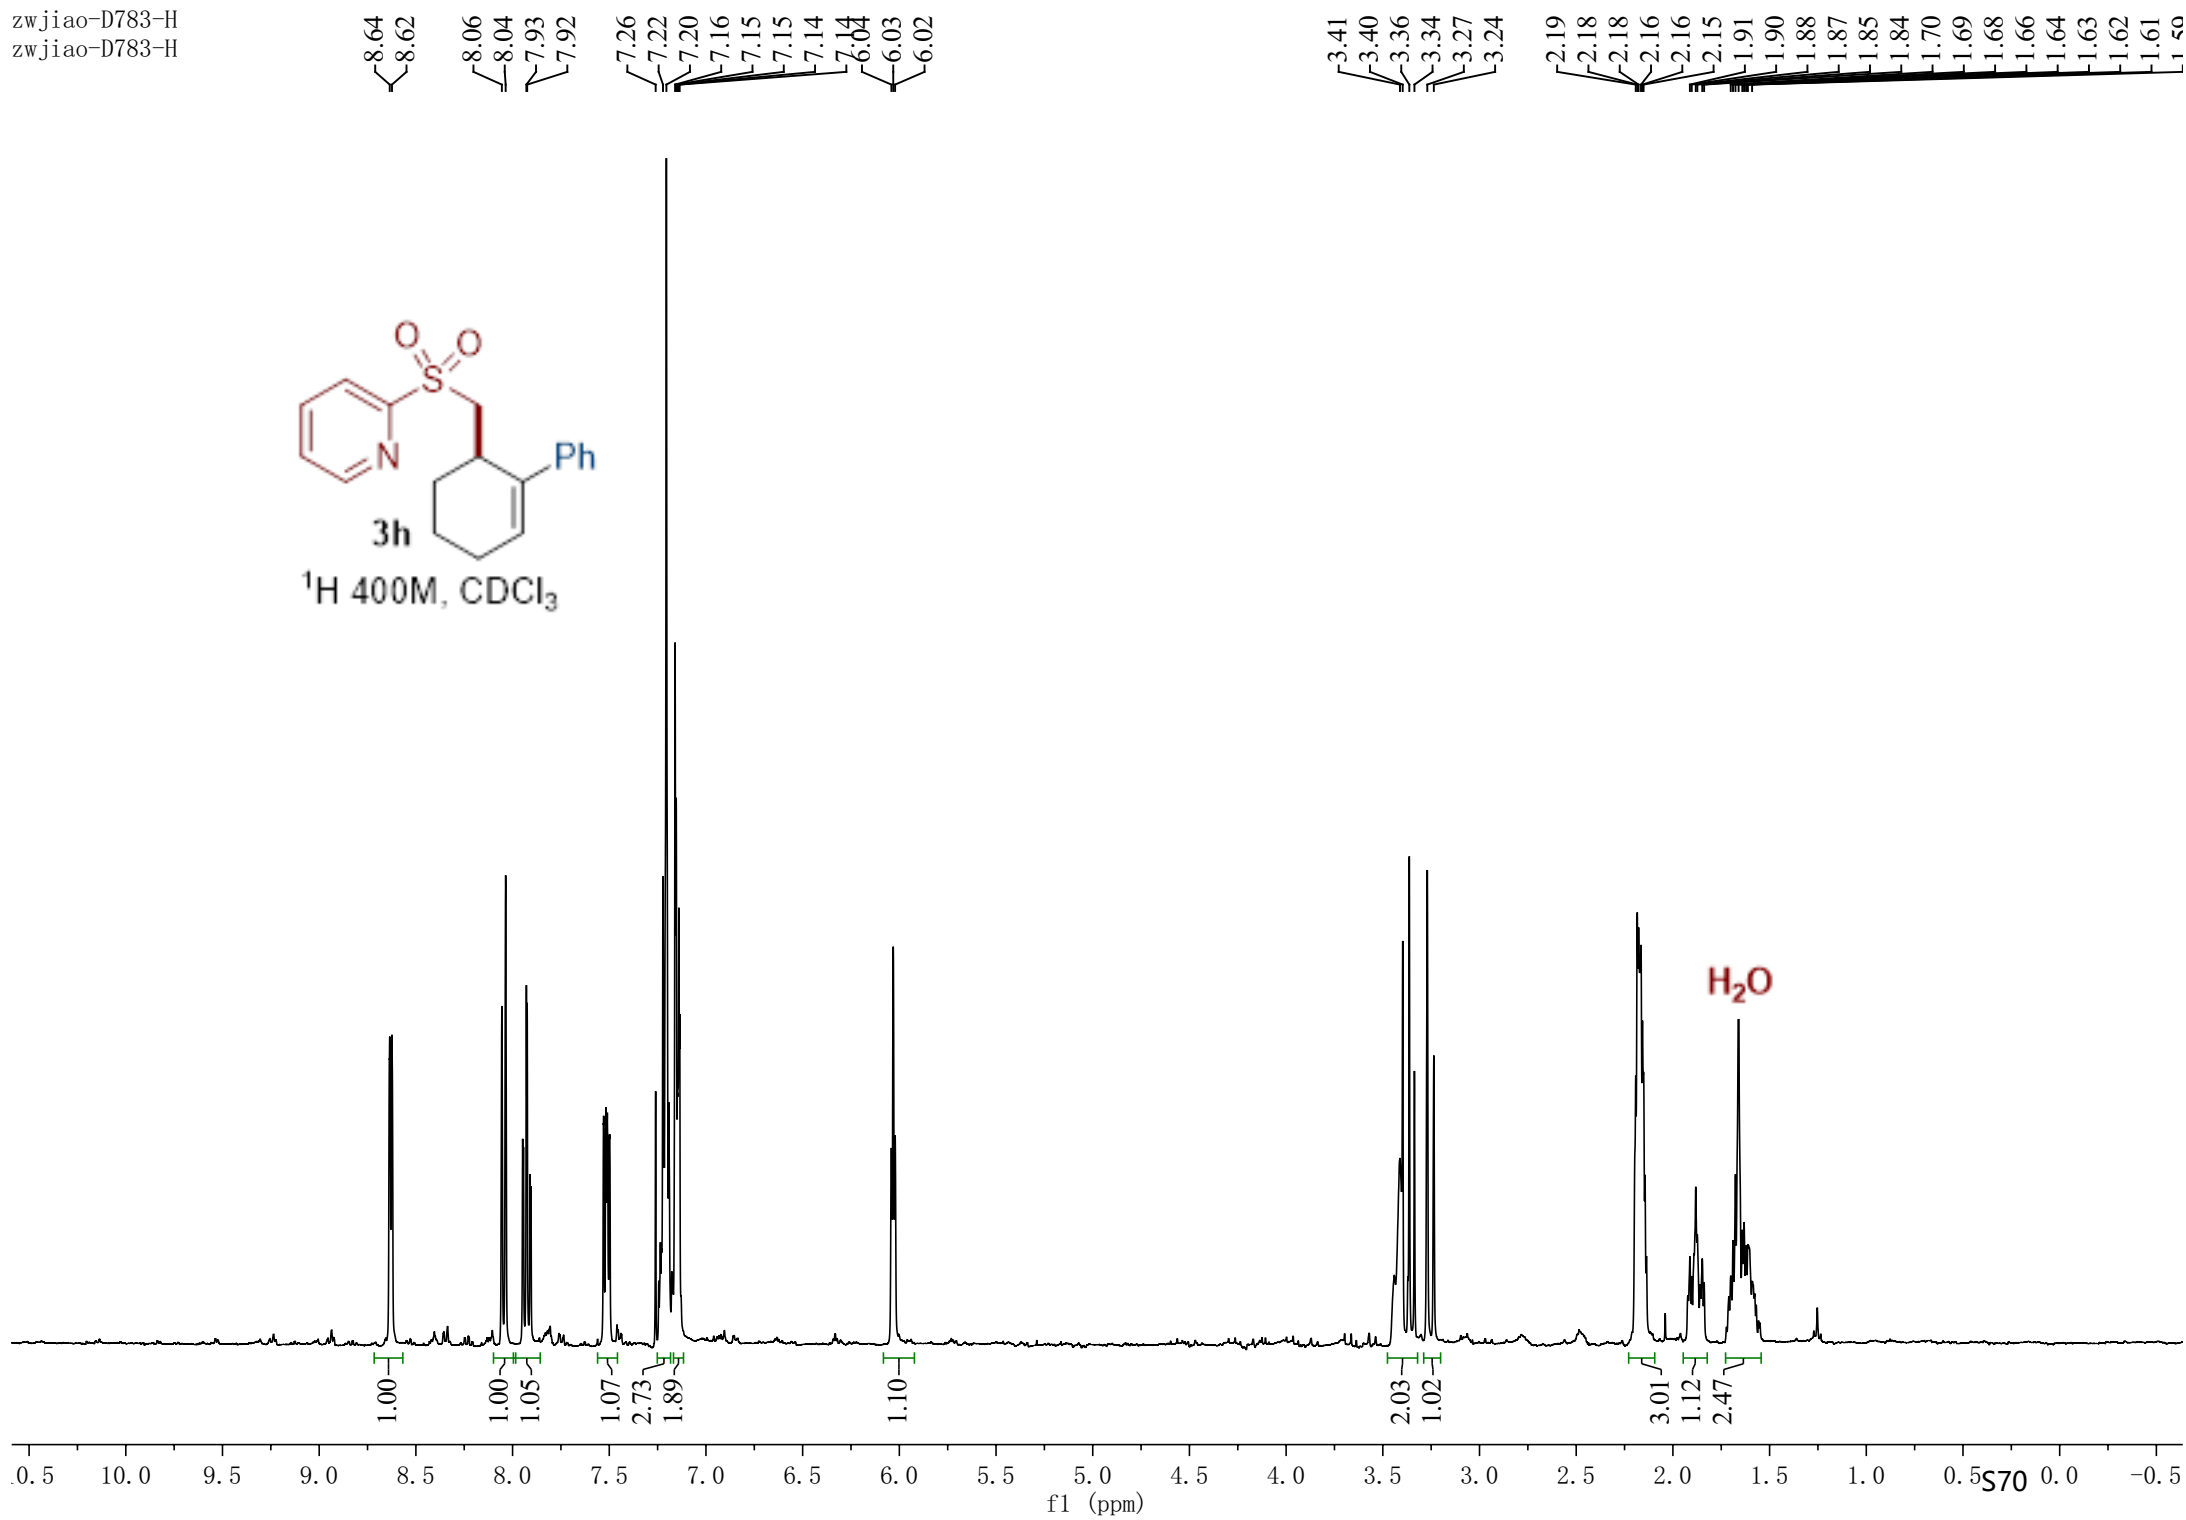

zwjiao-D783-C-3  
zwjiao-D783-C

—157.63  
—150.30  
140.36  
138.22  
138.20  
129.09  
128.58  
127.34  
127.21  
126.22  
122.16

77.48  
77.16  
76.84

—54.15

30.66  
26.89  
25.79  
—17.58

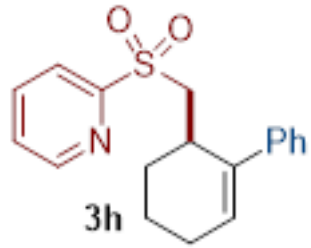

<sup>13</sup>C 101M, CDCl<sub>3</sub>

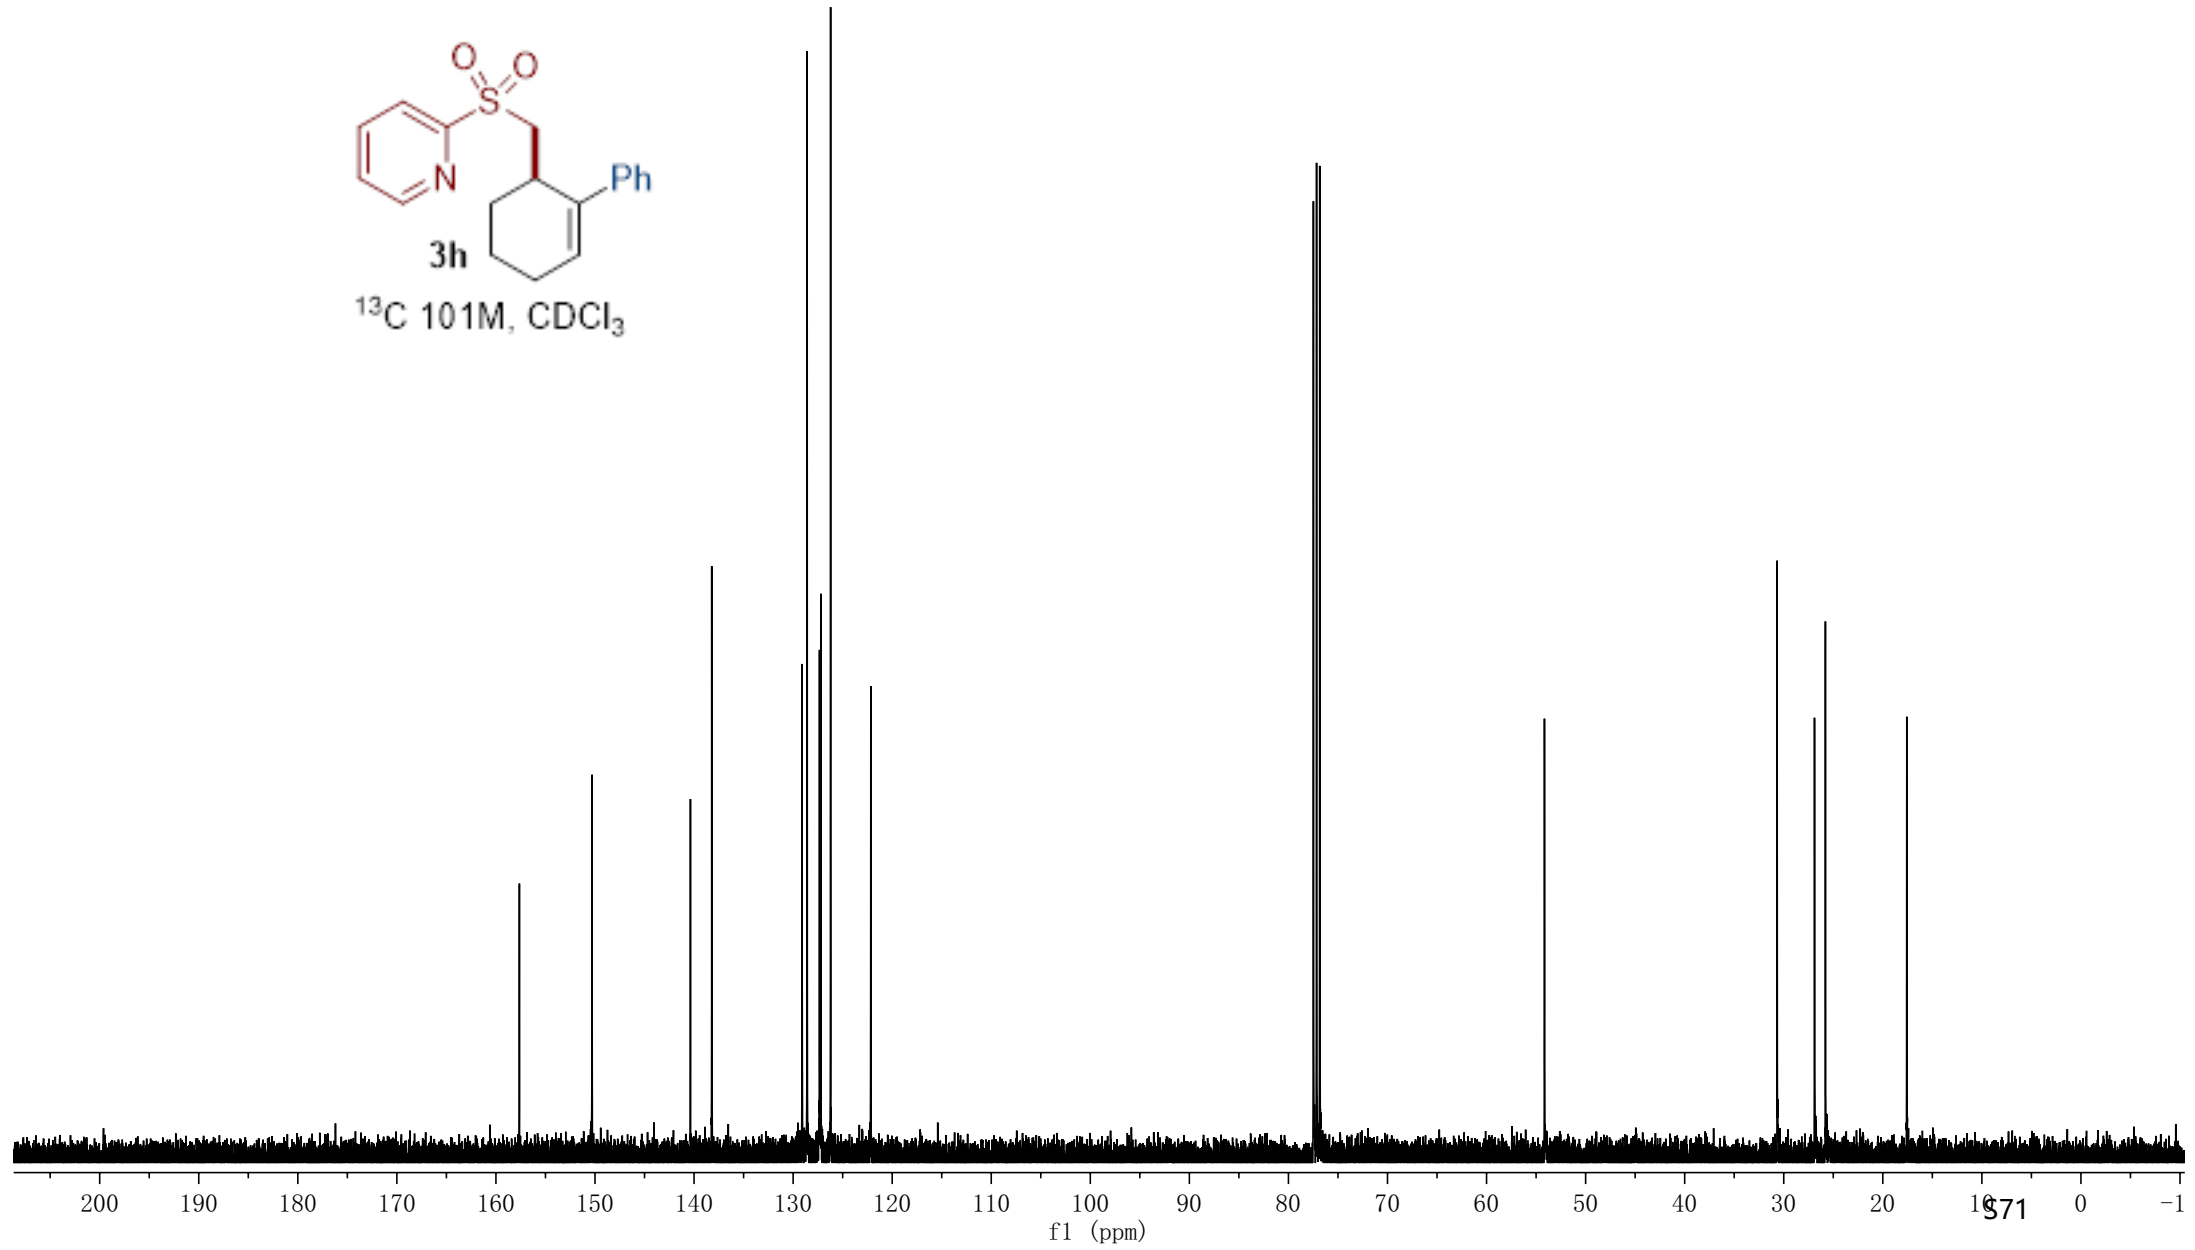

8.84  
8.83  
7.62  
7.60  
7.26  
7.24  
7.20  
7.19  
7.19  
7.18  
7.02  
7.01  
7.00  
7.00  
6.99  
6.03  
6.02  
6.01  
3.26  
3.24  
3.24  
3.23  
3.13  
3.10  
3.09  
3.06  
2.96  
2.93  
2.27  
2.26  
2.26  
2.25  
2.24  
2.24  
2.23  
2.22  
2.21  
2.21  
2.19  
2.19  
2.18  
2.17  
2.16  
2.16  
2.15  
1.96  
1.96  
1.95  
1.94  
1.93  
1.92  
1.91  
1.90  
1.89  
1.89  
1.76  
1.75  
1.74  
1.74  
1.72  
1.72  
1.71  
1.70  
1.61  
1.60  
1.59  
1.57  
1.57  
1.56  
1.54

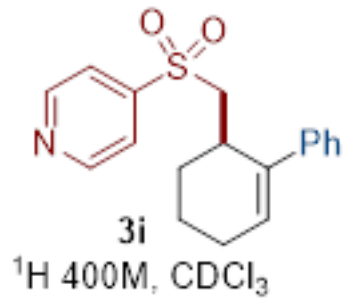

zwjiao-D850-H  
zwjiao-D850-H

7.62  
7.61  
7.26  
7.20  
7.19  
7.19  
7.18  
7.02  
7.01  
7.00  
7.00  
6.99  
6.03  
6.02  
6.01

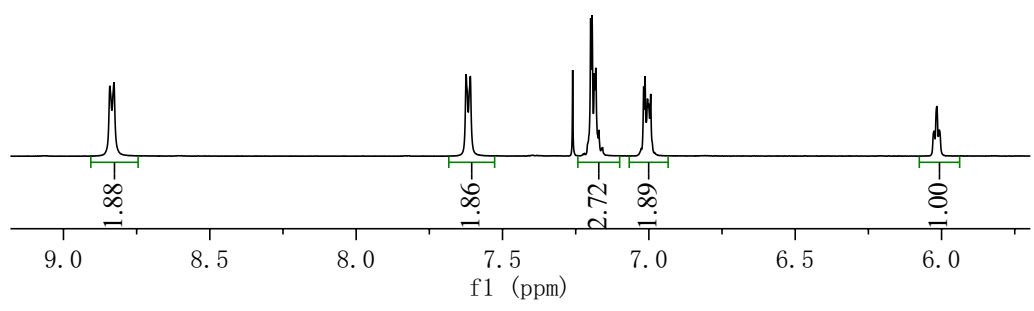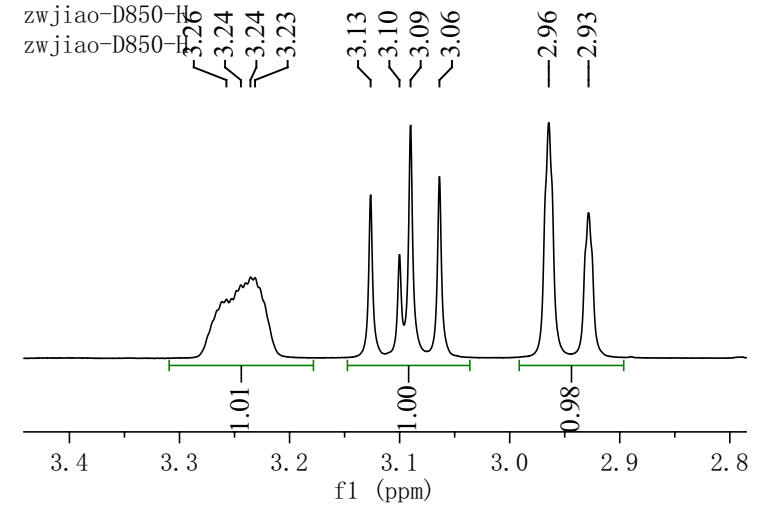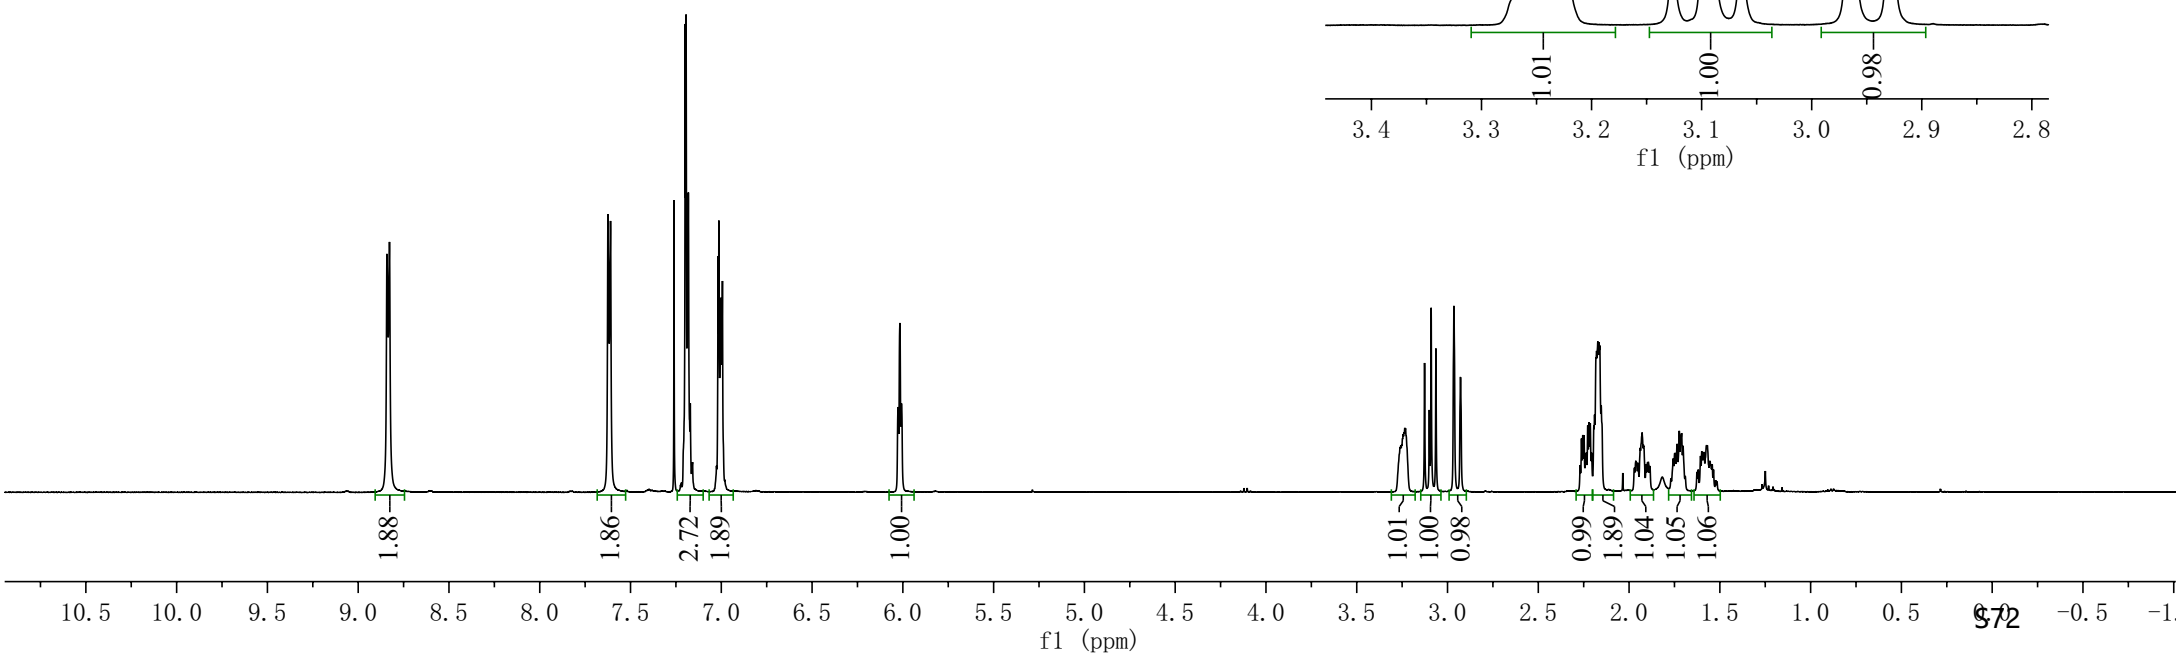



zwjiao-D850-C  
zwjiao-D850-C

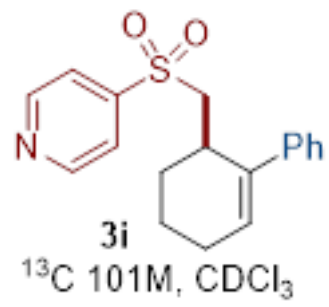

—151.33  
—147.44  
—140.12  
—137.72  
—129.42  
—128.68  
—127.42  
—126.08  
—121.18

—77.48  
—77.16  
—76.84

—57.63

—30.95  
—26.81  
—25.70

—17.60

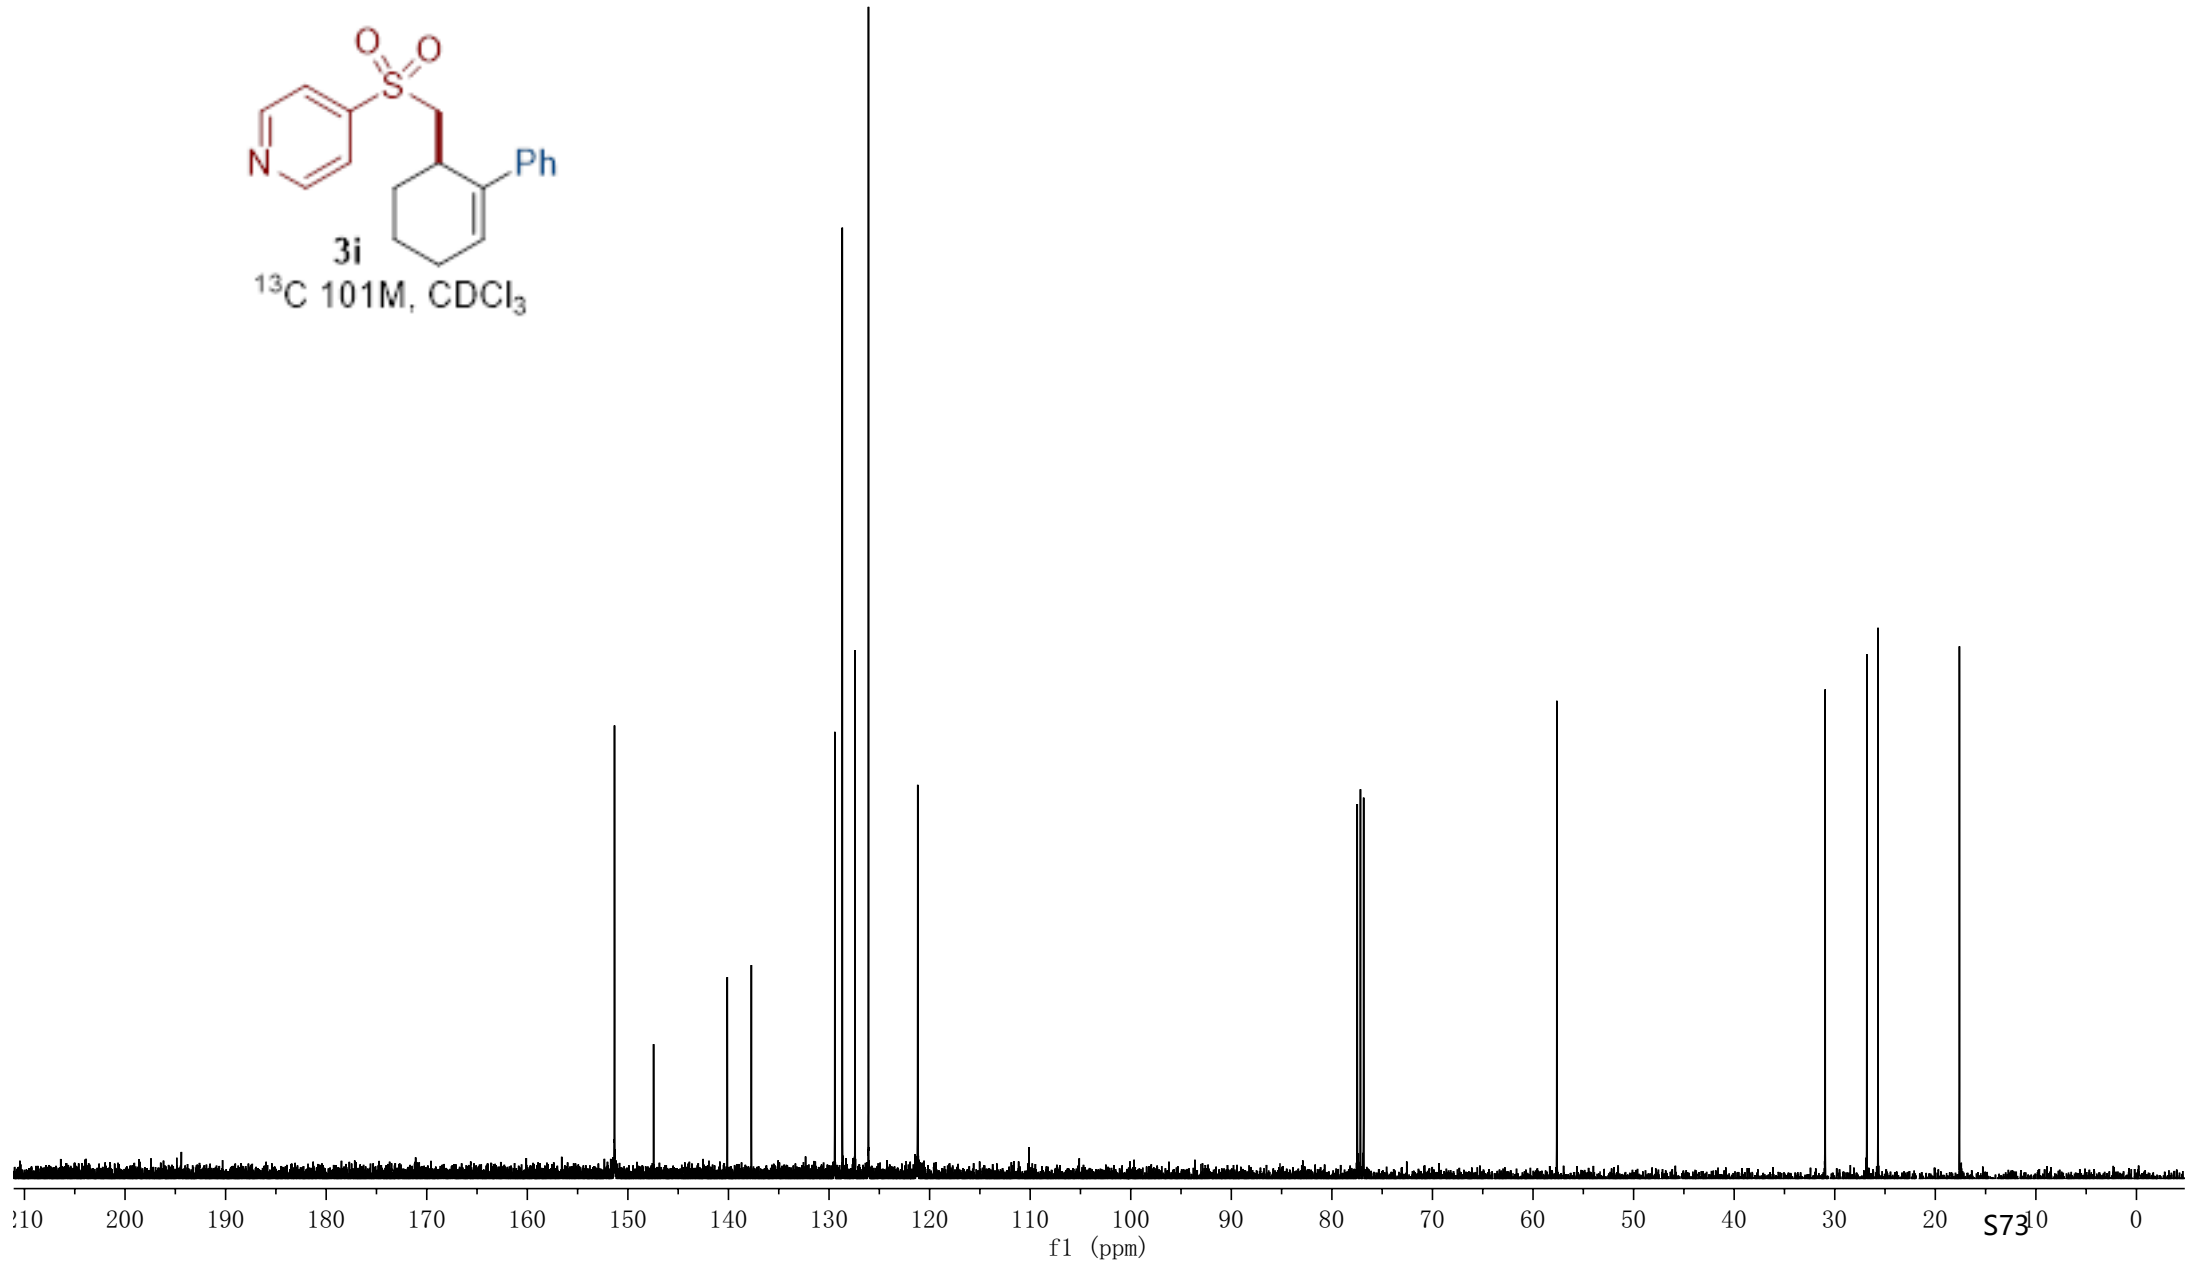

zwjiao-D817-H  
zwjiao-D817-H

8.86  
8.85  
7.52  
7.51  
7.49  
7.26  
7.25  
7.24  
7.24  
7.23  
7.22  
7.21  
7.21  
7.21  
7.20  
6.06  
6.05  
6.04

3.53  
3.52  
3.49  
3.46  
3.43  
3.40  
2.23  
2.22  
2.21  
2.20  
2.19  
2.18  
2.04  
1.97  
1.94  
1.93  
1.90  
1.72  
1.71  
1.69  
1.68  
1.67  
1.66  
1.65  
1.64  
1.63  
1.58  
1.26

zwjiao-D817-H  
zwjiao-D817-H

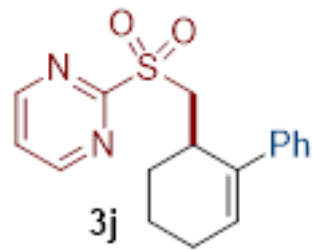

<sup>1</sup>H 400M, CDCl<sub>3</sub>

7.52  
7.51  
7.49  
7.26  
7.24  
7.23  
7.22  
7.21  
7.21  
7.20

zwjiao-D817-H  
zwjiao-D817-H

3.53  
3.52  
3.49  
3.46  
3.43  
3.40

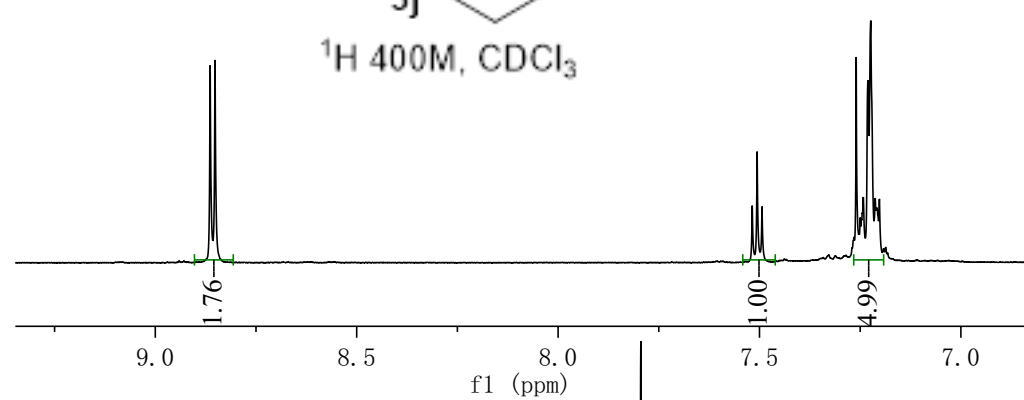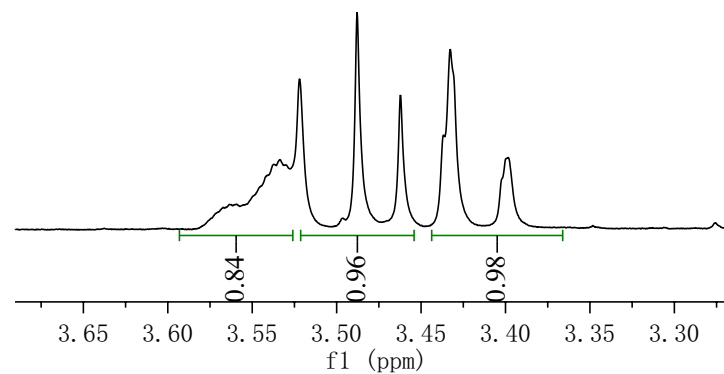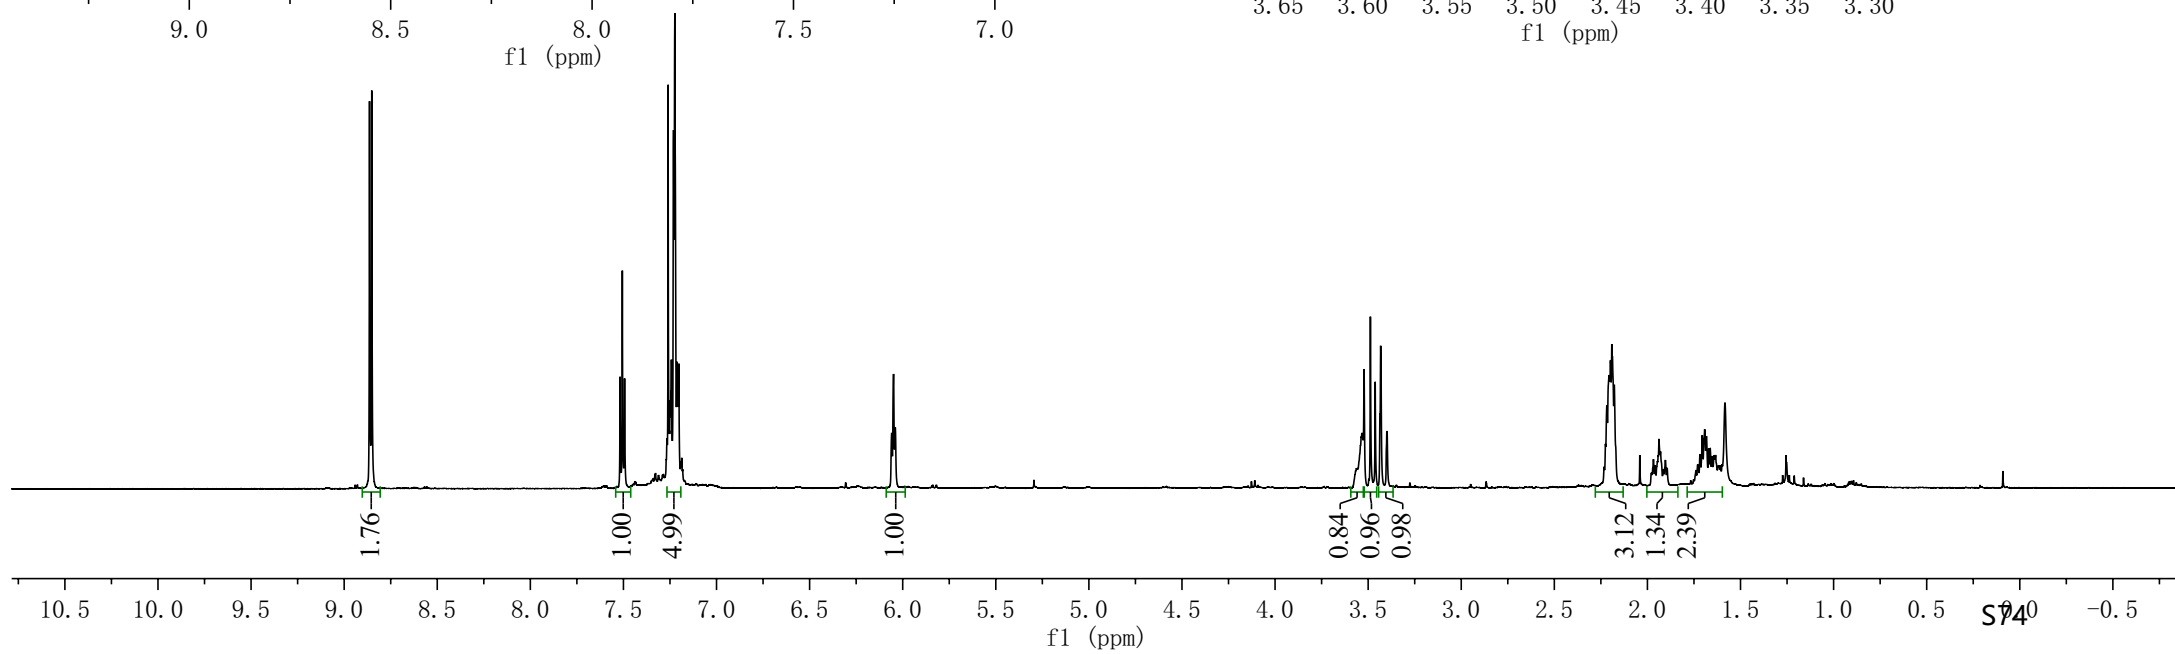

zwjiao-D817-C  
zwjiao-D817-C

—166.08

—158.67

~140.53

~138.27

~129.30

~128.64

~127.28

~126.41

~123.72

~77.48

~77.16

~76.84

—53.59

~30.71

~27.14

~25.82

—17.63

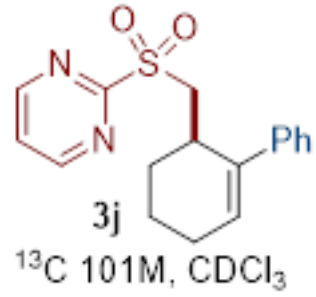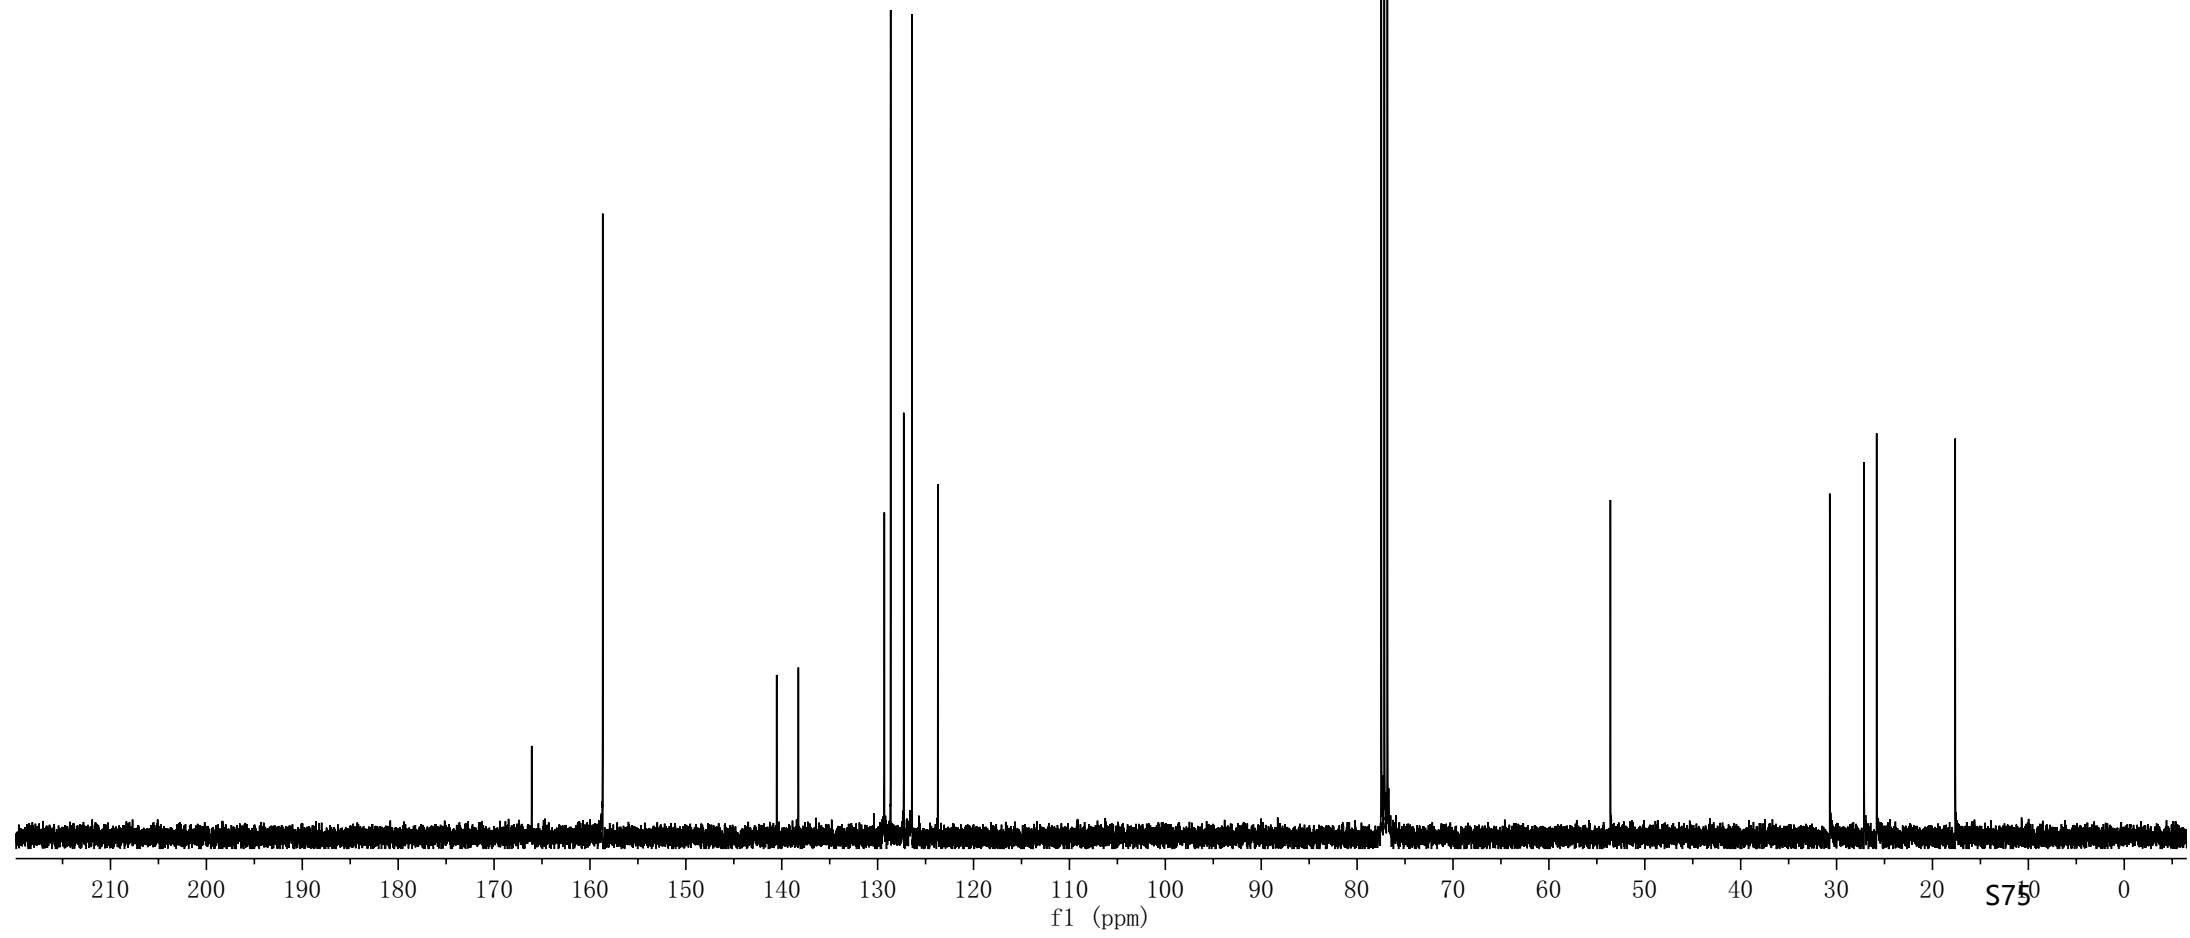

8.18  
8.18  
8.16  
8.08  
8.04  
7.99  
7.99  
7.67  
7.66  
7.65  
7.64  
7.63  
7.62  
7.62  
7.62  
7.60  
7.60  
7.58  
7.58  
7.26  
7.12  
7.10  
7.08  
7.08  
7.06  
7.06  
7.04  
7.02  
7.01  
6.05  
6.04  
6.03  
3.52  
3.48  
3.45  
3.42  
3.40  
3.40  
3.36  
3.36  
2.29  
2.28  
2.27  
2.27  
2.26  
2.25  
2.25  
2.24  
2.23  
2.21  
2.20  
2.19  
2.19  
2.00  
2.00  
1.99  
1.96  
1.96  
1.93  
1.76  
1.75  
1.74  
1.73  
1.71  
1.71  
1.67  
1.66  
1.65  
1.64  
1.63  
1.60

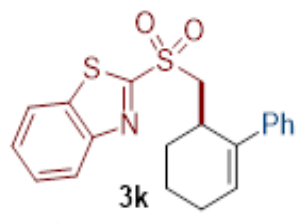

<sup>1</sup>H 400M, CDCl<sub>3</sub>

zwjiao-D834-H  
zwjiao-D834-H

8.18  
8.18  
8.16  
8.01  
7.99  
7.99  
7.67  
7.66  
7.65  
7.64  
7.63  
7.62  
7.62  
7.62  
7.60  
7.60  
7.58  
7.58  
7.26  
7.12  
7.10  
7.08  
7.08  
7.06  
7.06  
7.04  
7.02  
7.01  
6.05  
6.04  
6.03  
3.52  
3.48  
3.45  
3.42  
3.40  
3.40  
3.36  
3.36

zwjiao-D834-H  
zwjiao-D834-H

3.52  
3.48  
3.45  
3.42  
3.40  
3.40  
3.36  
3.36

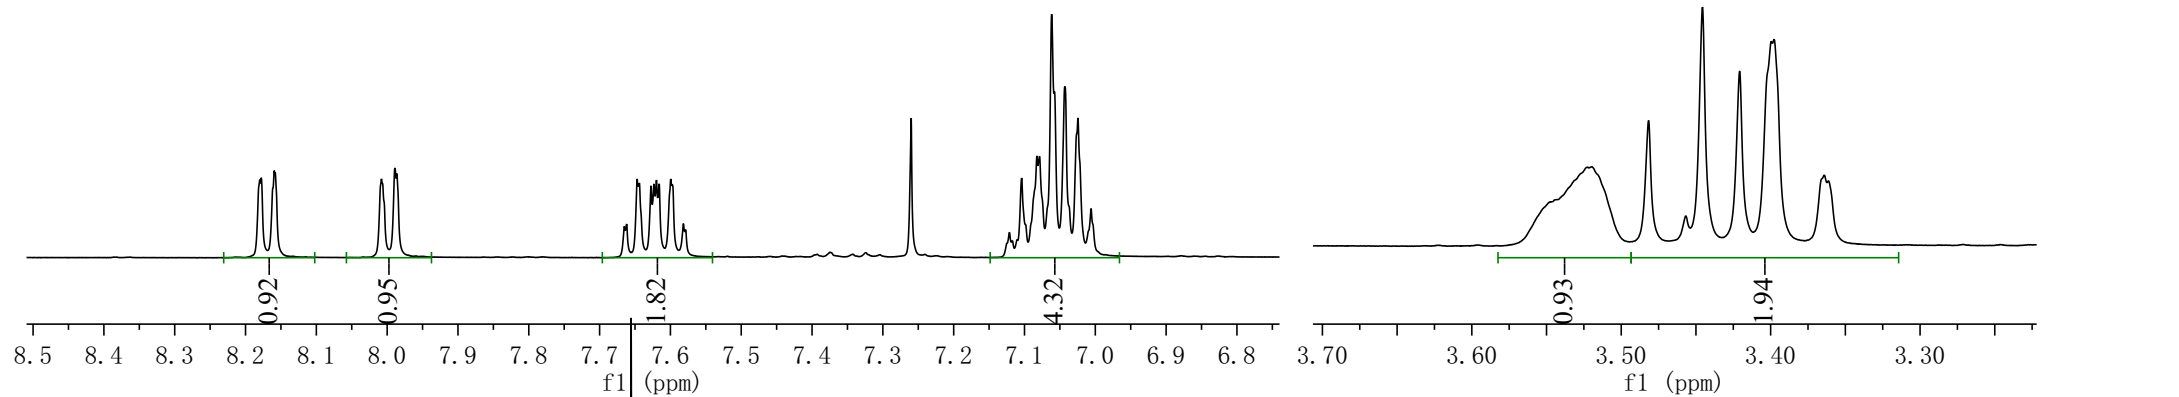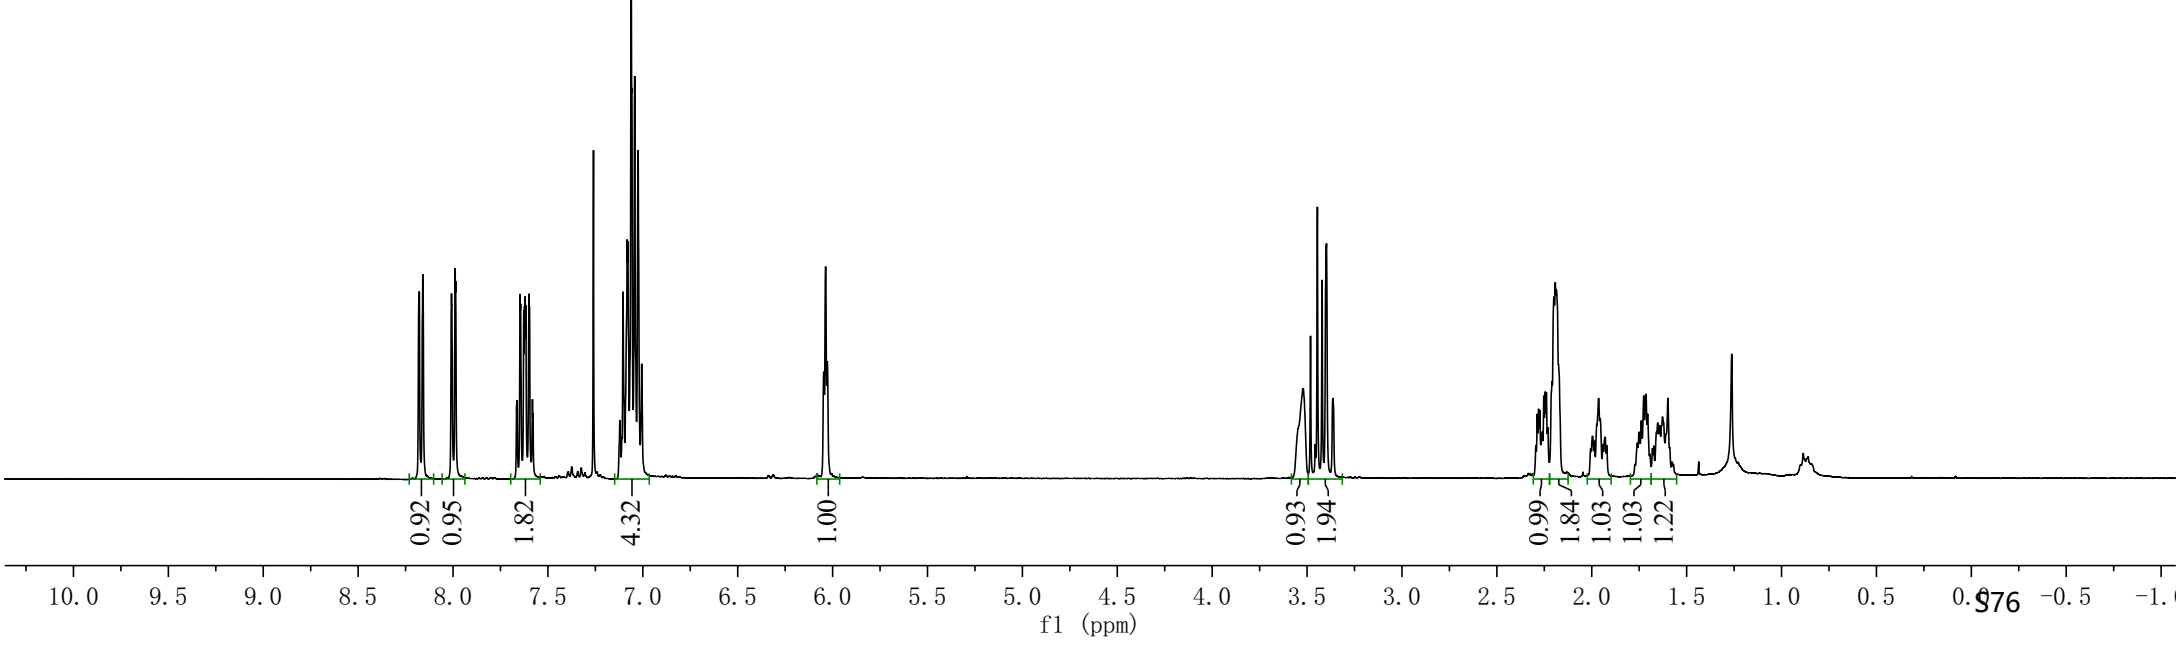

zwjiao-D834-C  
zwjiao-D834-C

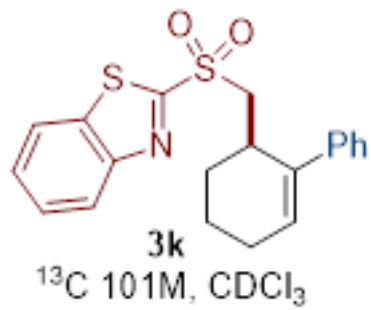

—165.95

—152.78

140.12

137.85

137.04

129.42

128.50

128.13

127.71

127.30

126.17

125.68

122.42

77.48

77.16

76.84

—57.11

31.05

26.95

25.76

—17.54

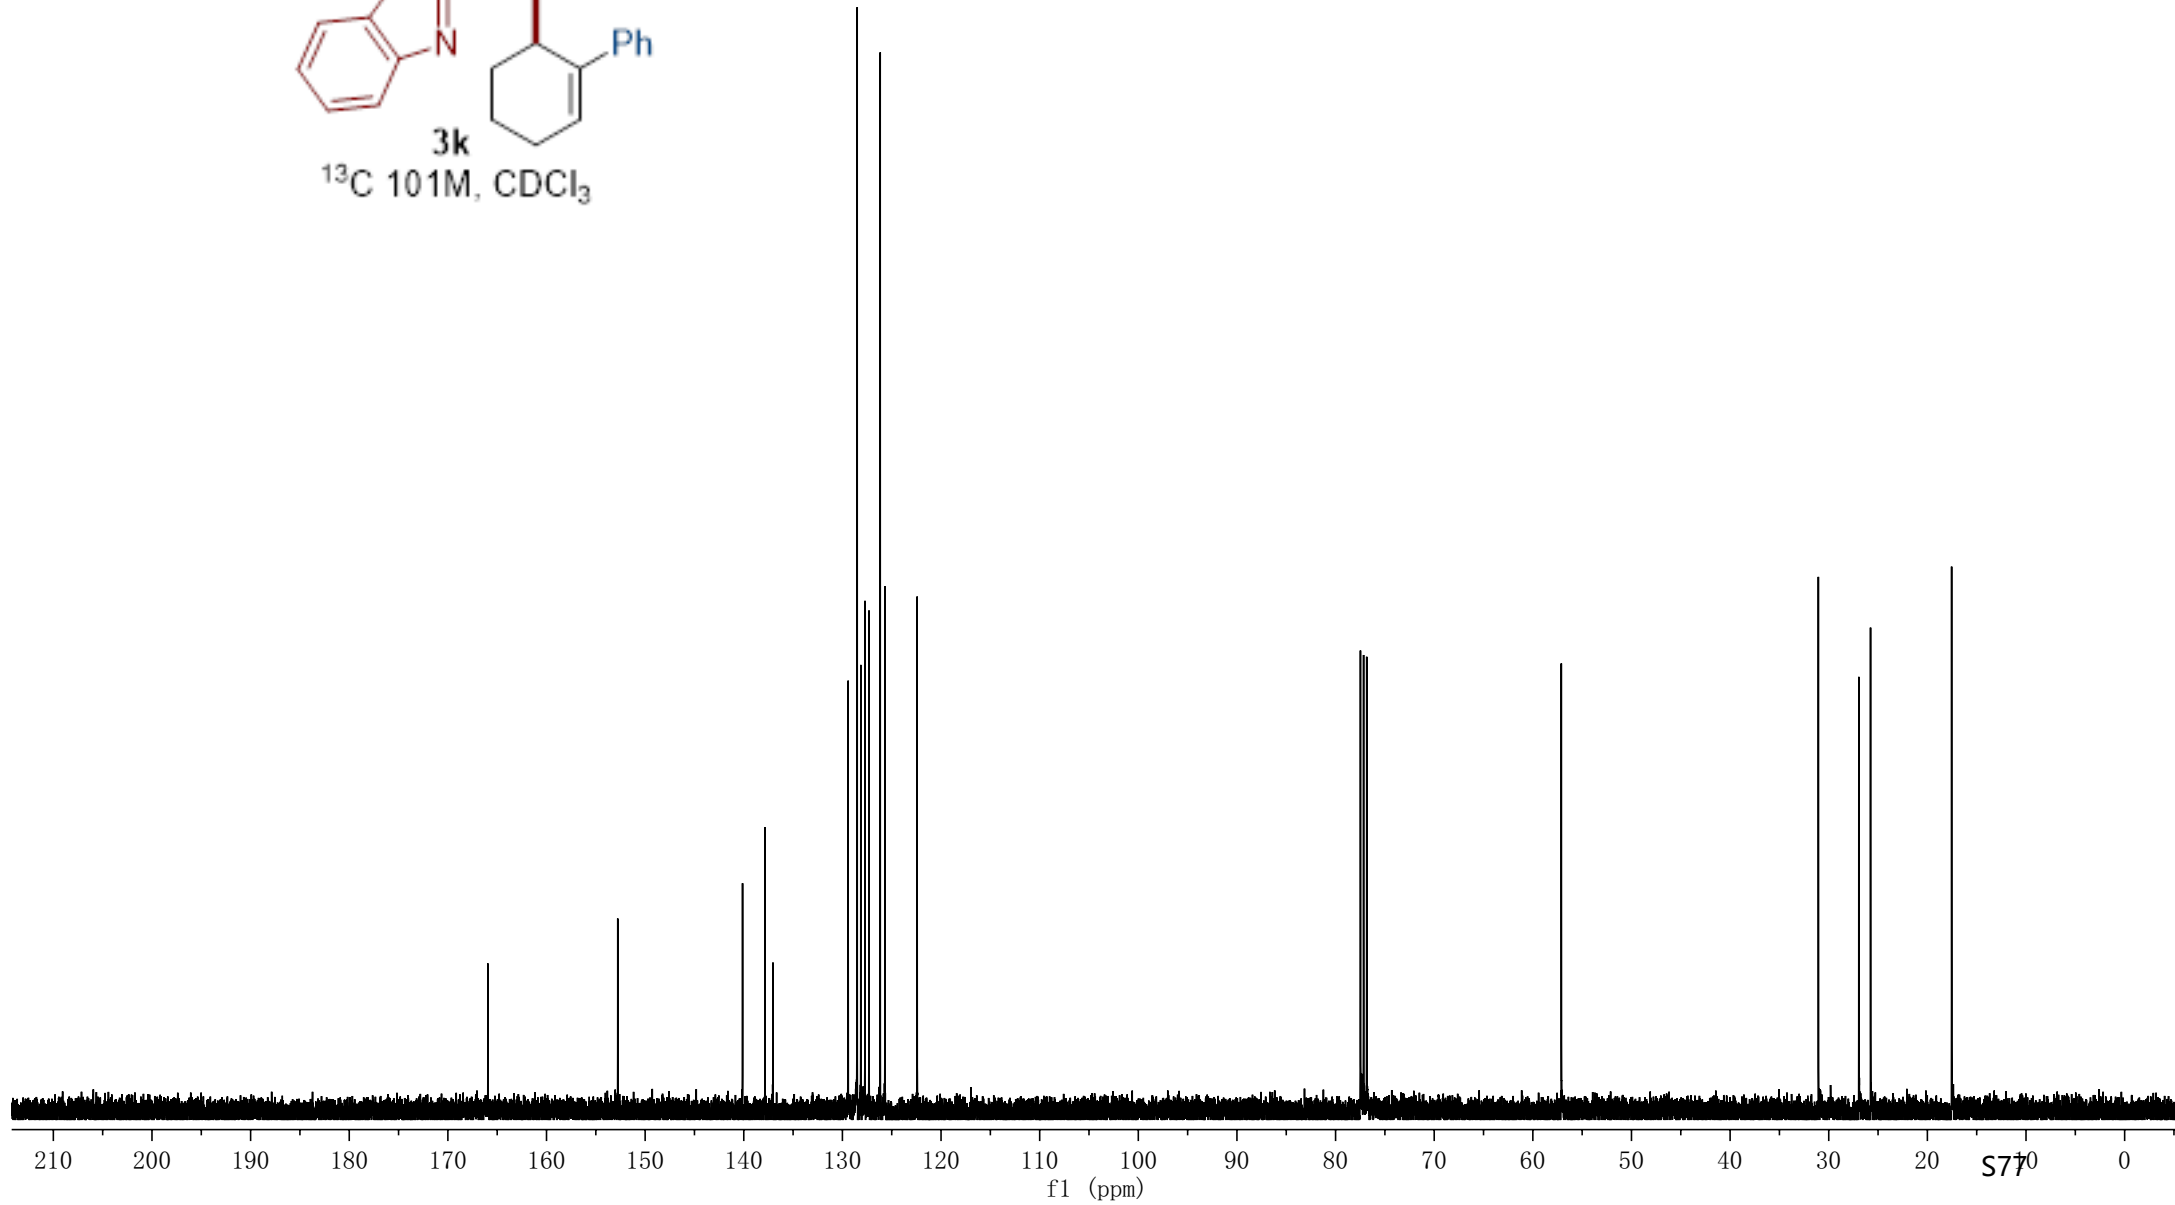

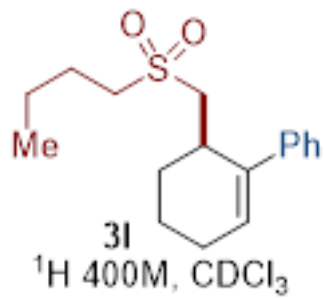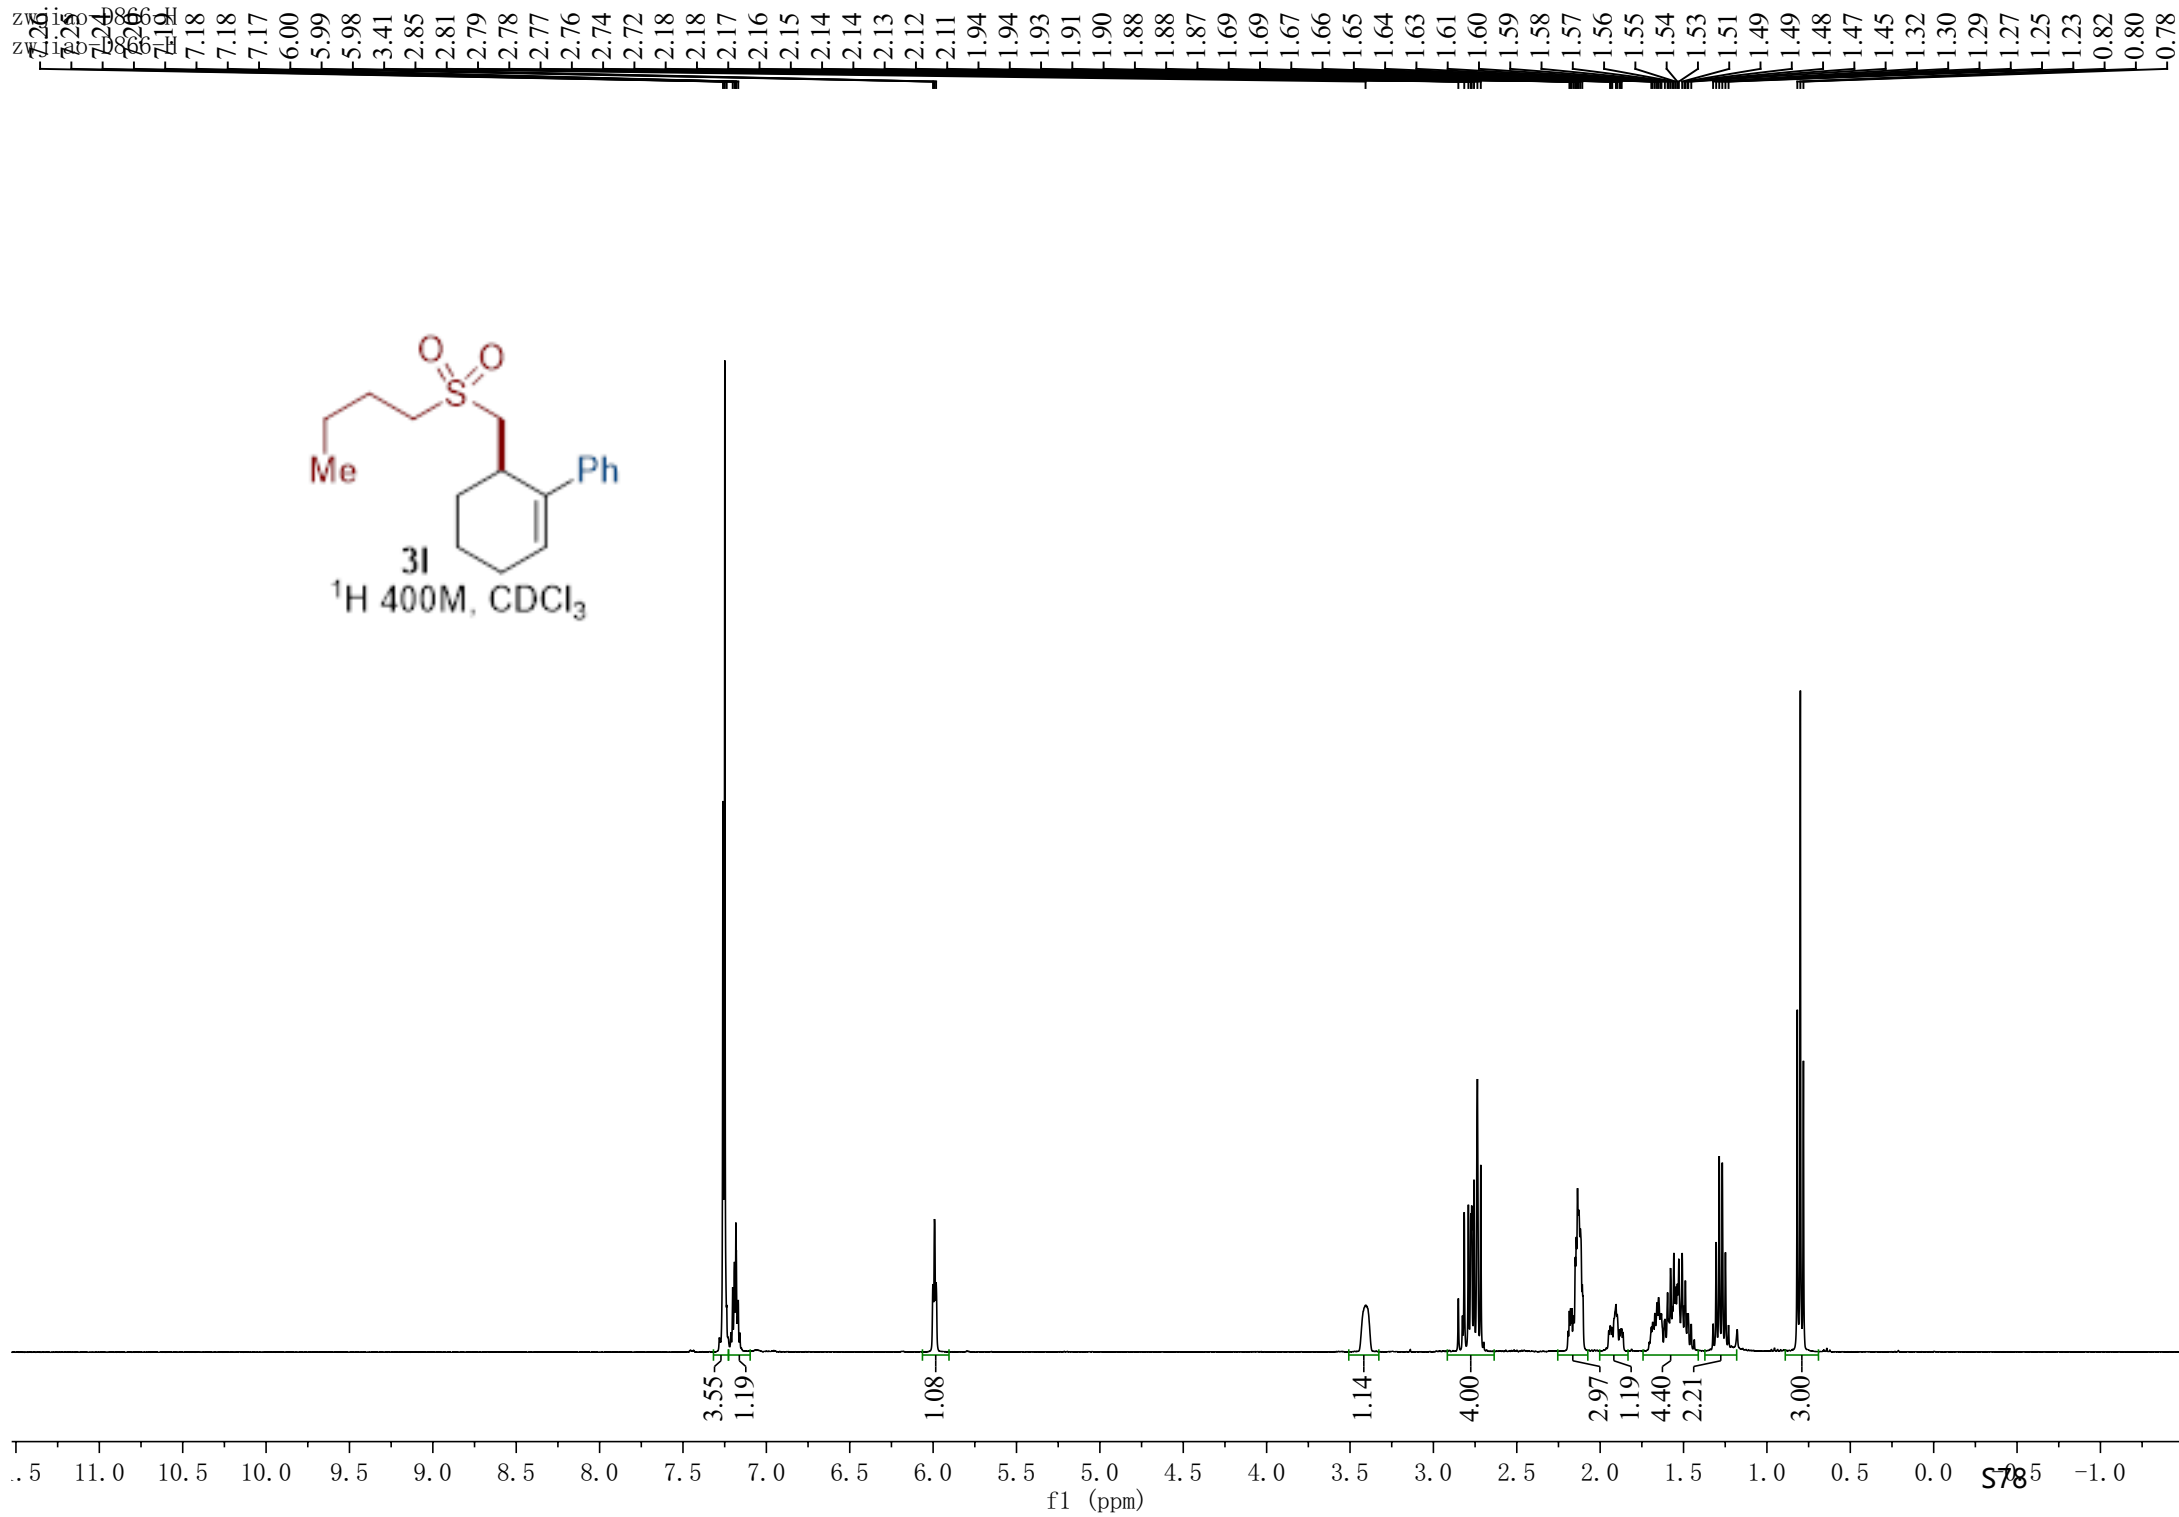

zwjiao-D866-C  
zwjiao-D866-C

~140.70  
~138.41  
~129.13  
~128.76  
~127.45  
~126.43

~77.48  
~77.16  
~76.84

~54.55  
~53.81

~30.53  
~27.33  
~25.81  
~24.01  
~21.77  
~17.74  
~13.60

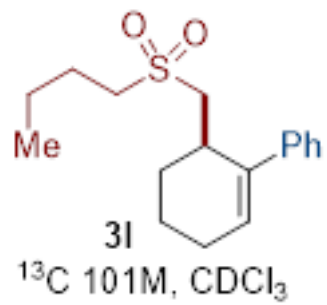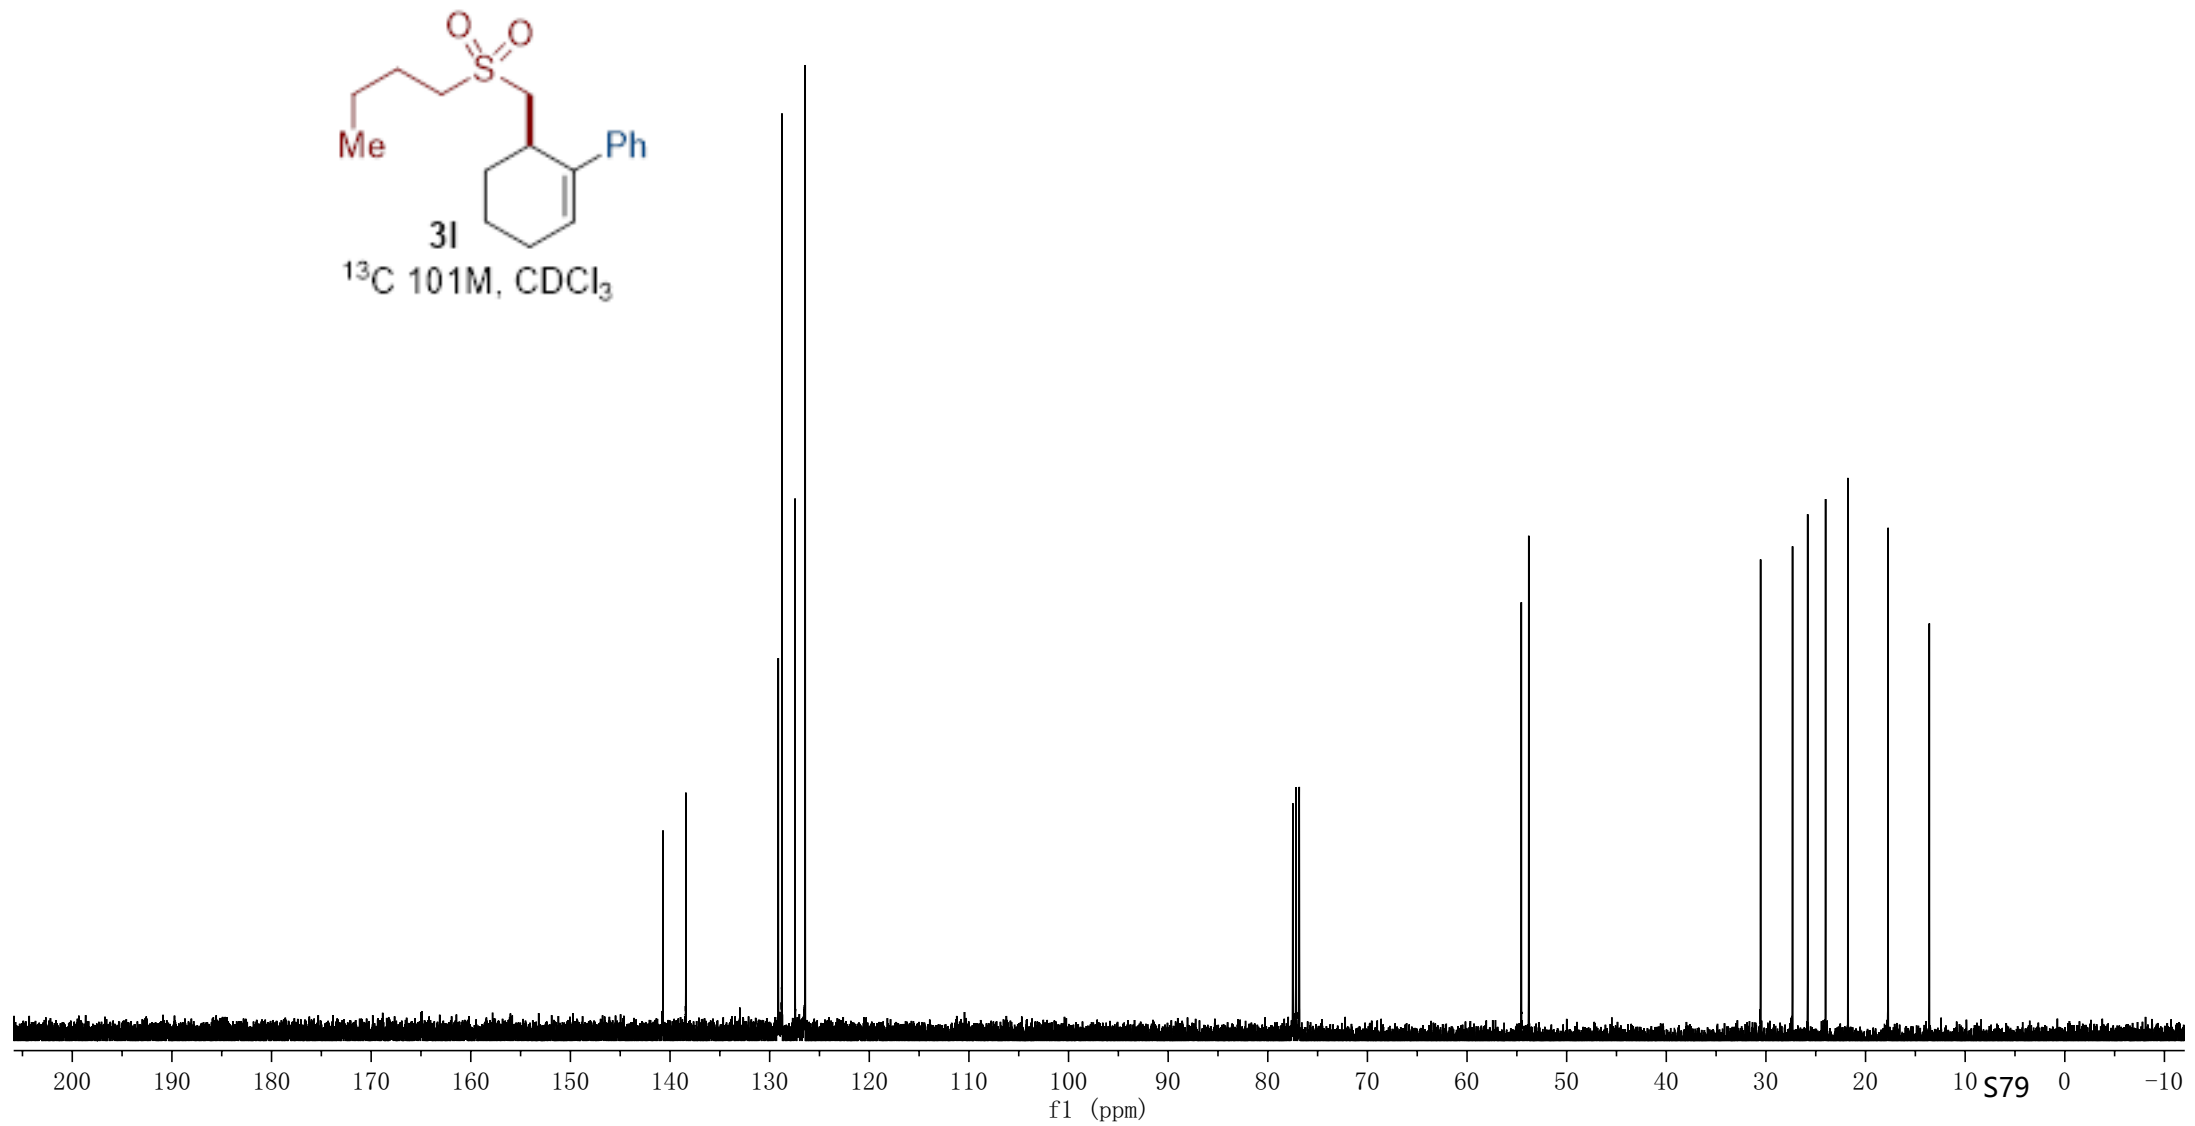

zwjiao-D881-H  
zwjiao-D881-H

7.34  
7.33  
7.28  
7.26  
7.25

6.08  
6.07  
6.06

3.48

2.85  
2.83  
2.81  
2.79

2.23  
2.21  
2.20  
2.19  
1.99  
1.74  
1.73  
1.69  
1.67  
1.65  
1.64  
1.62  
1.60  
1.58  
1.55  
1.30  
1.29  
1.25  
1.24  
0.89  
0.87

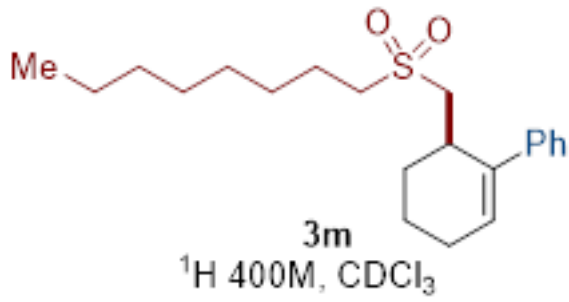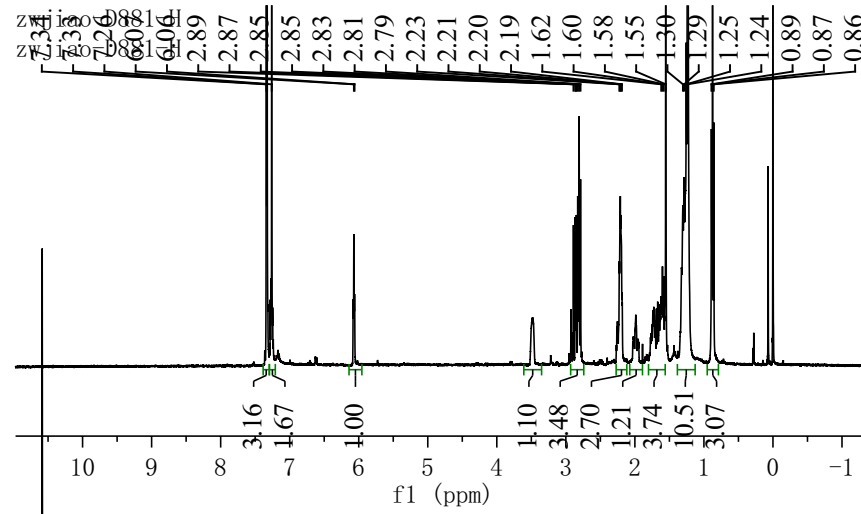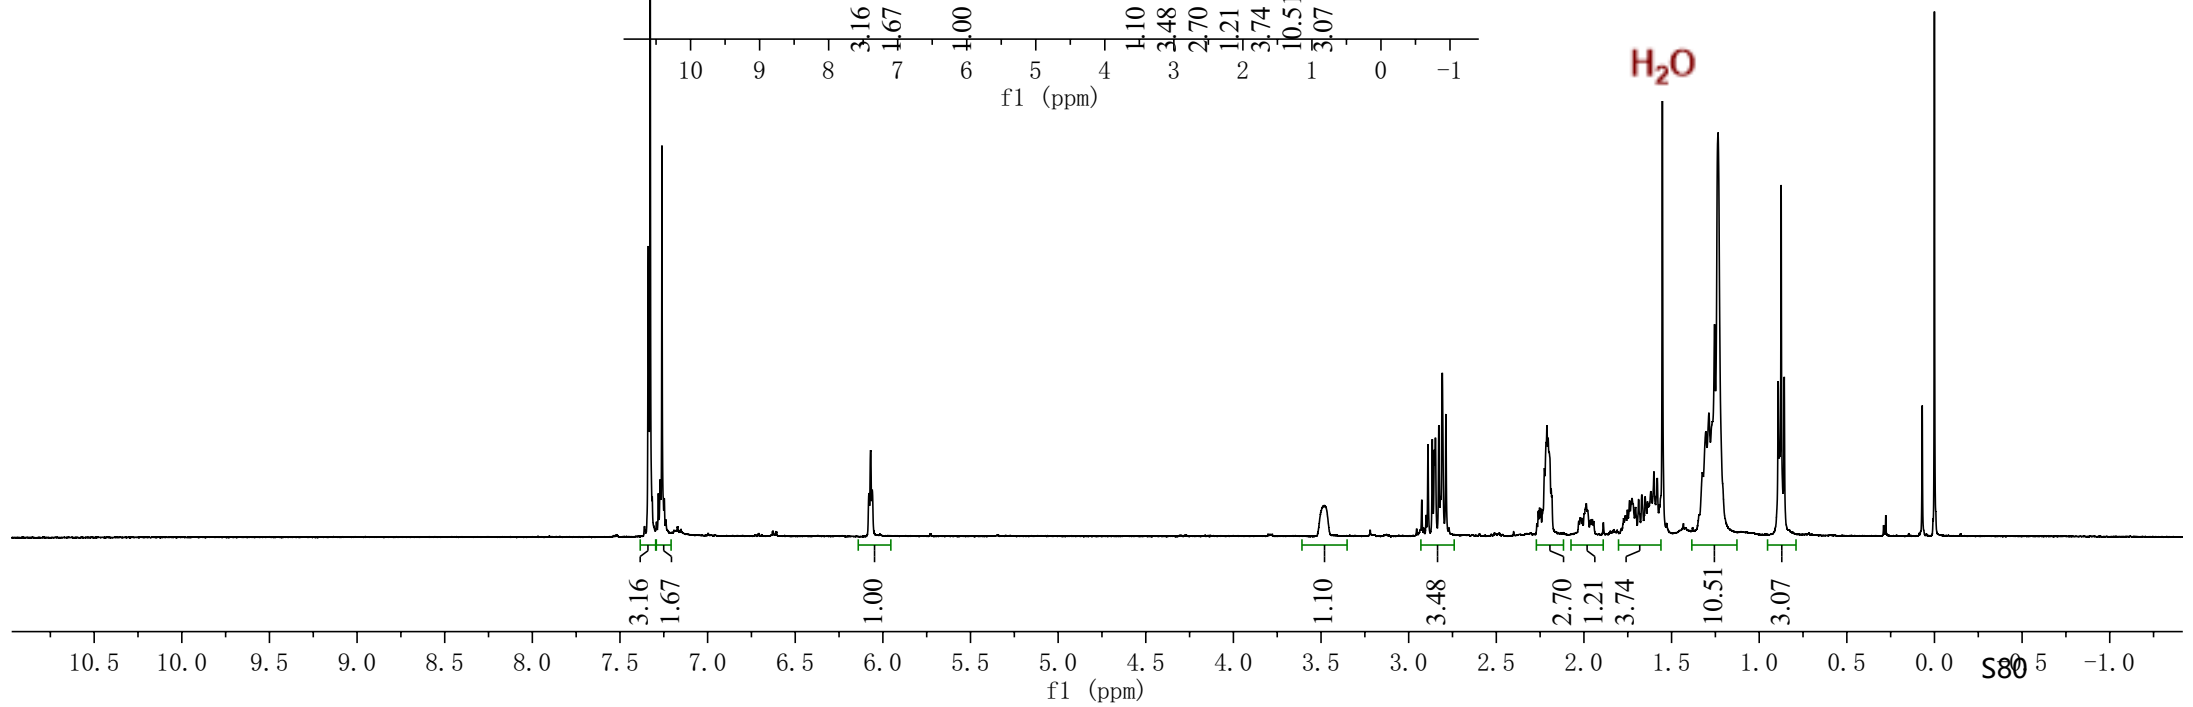



zwjiao-D881-C  
zwjiao-D881-C

140.75  
138.46  
129.19  
128.81  
127.50  
126.47

77.48  
77.16  
76.84

54.60  
54.13

31.83  
30.58  
29.11  
29.04  
28.55  
27.37  
25.85  
22.72  
22.10  
17.79  
14.21

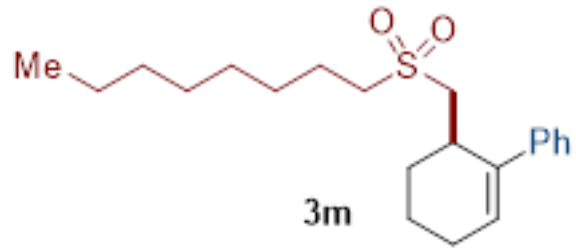

<sup>13</sup>C 101M, CDCl<sub>3</sub>

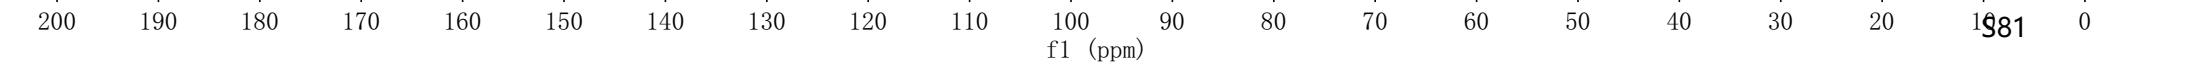

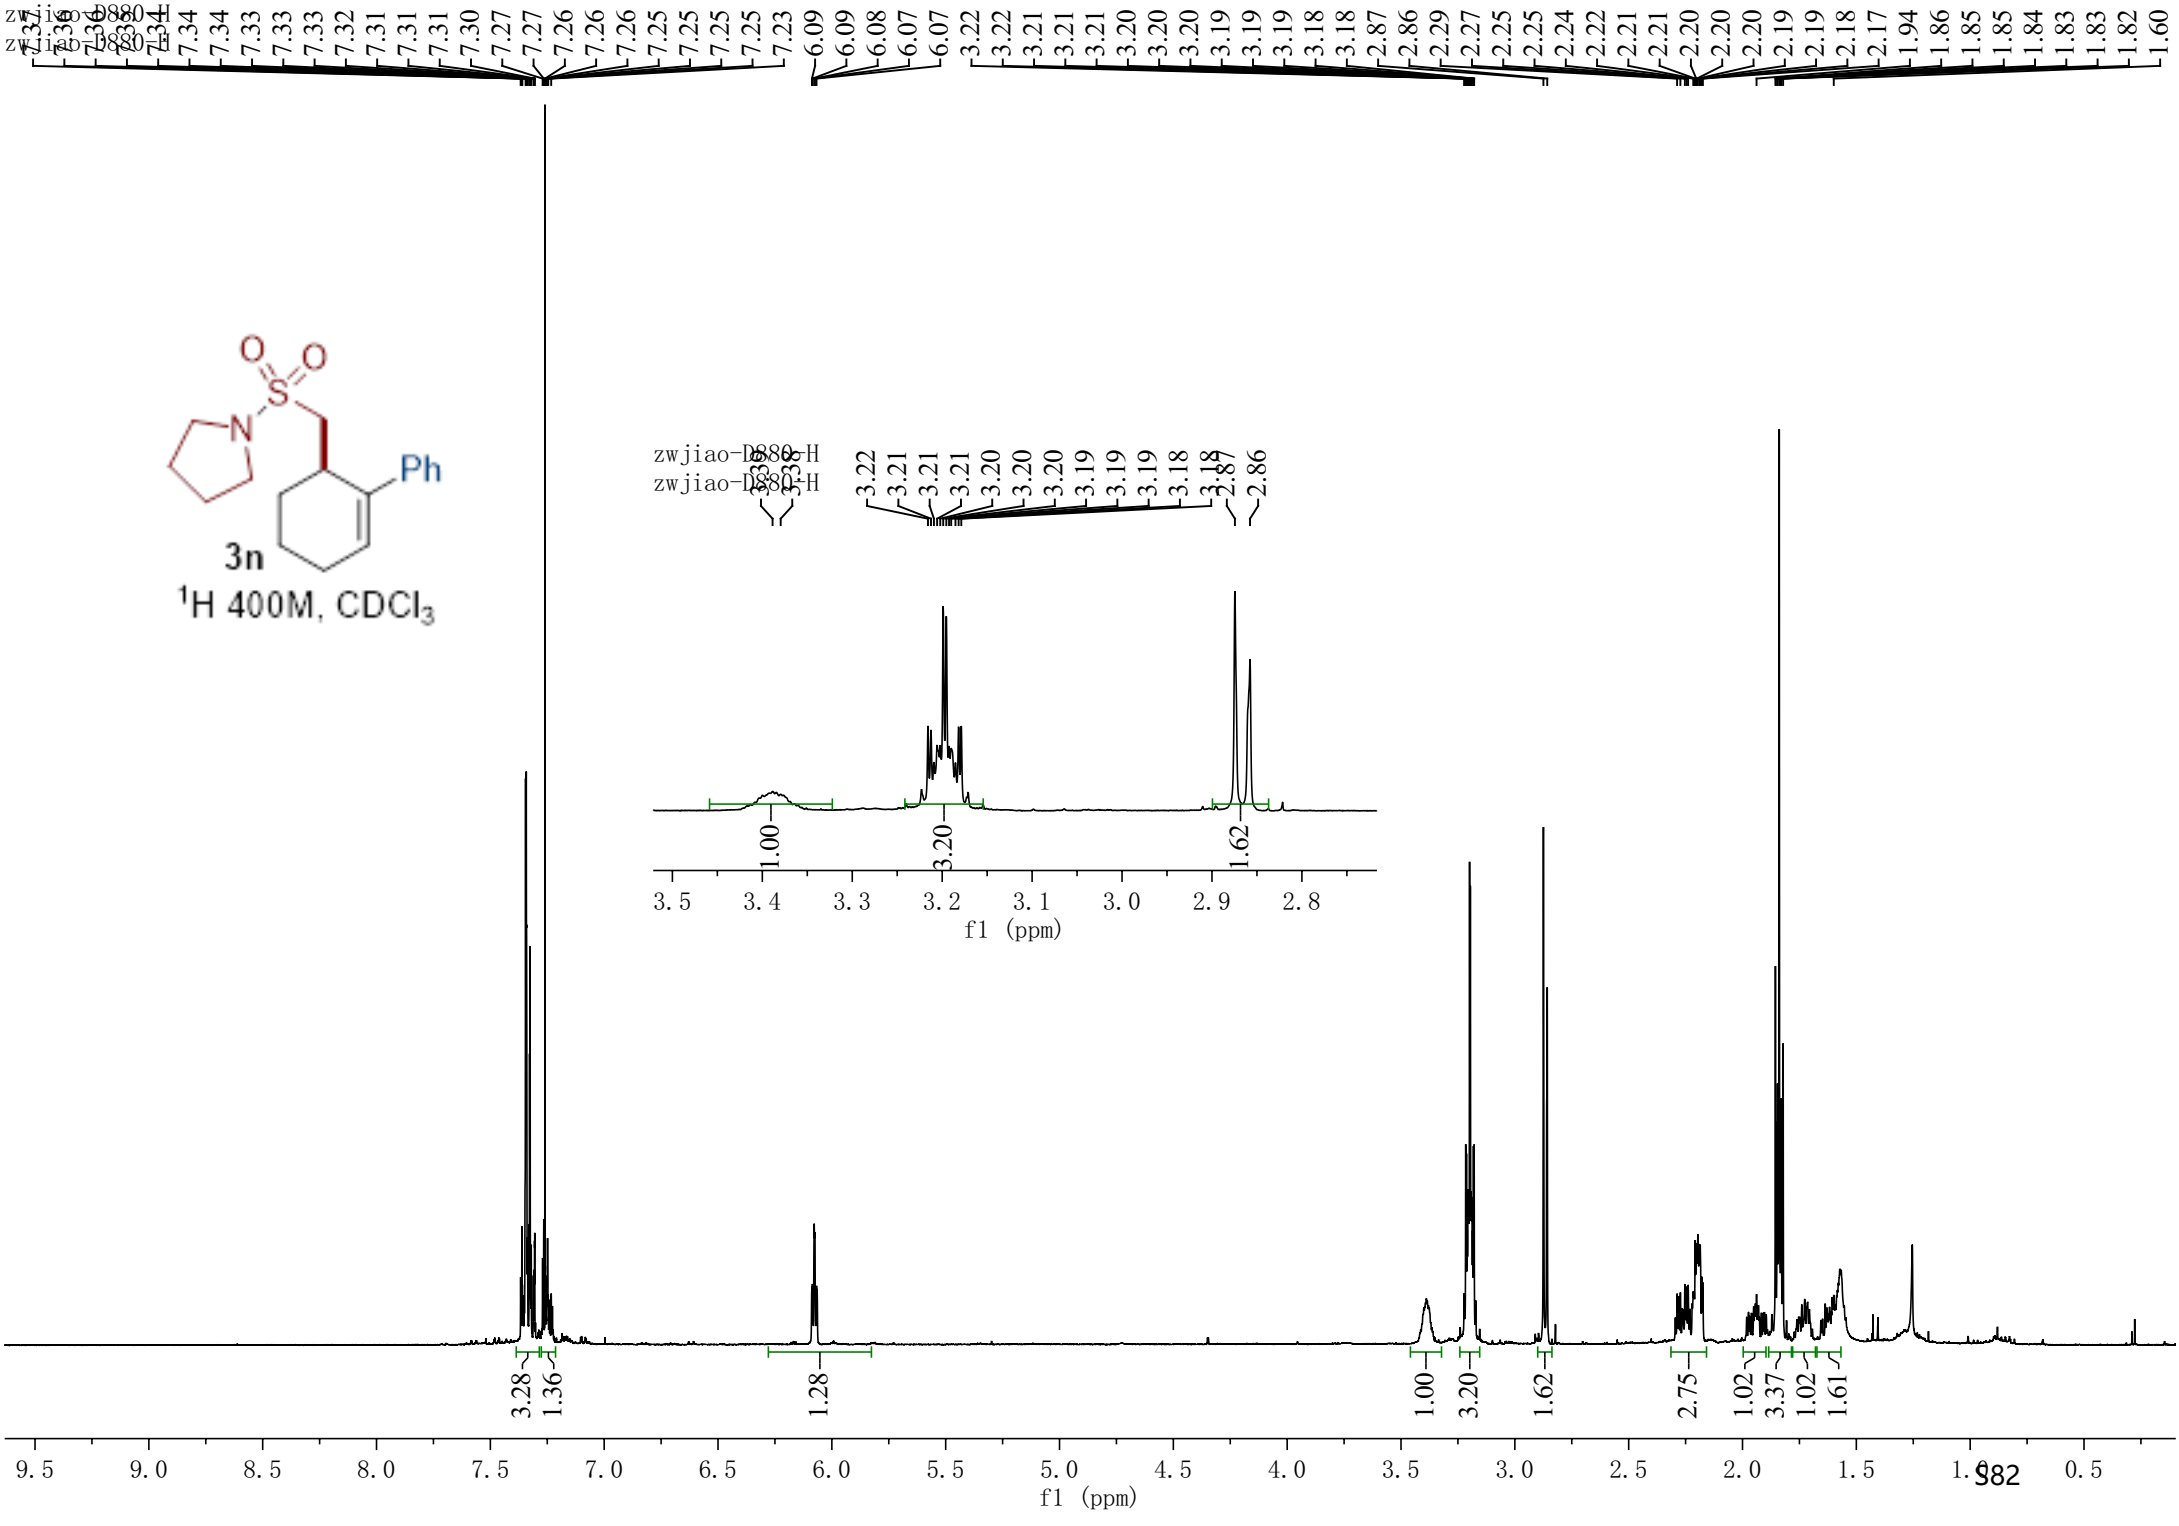

zwjiao-D880-C--1  
zwjiao-D880-C

~140.81  
~138.64  
128.70  
128.67  
127.34  
126.39

77.48  
77.16  
76.84

—51.41  
—47.65

31.60  
26.87  
25.97  
25.90

—17.92

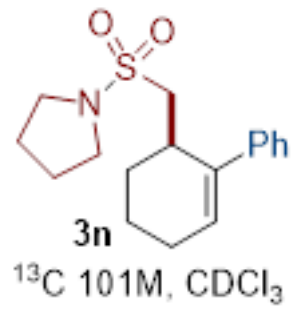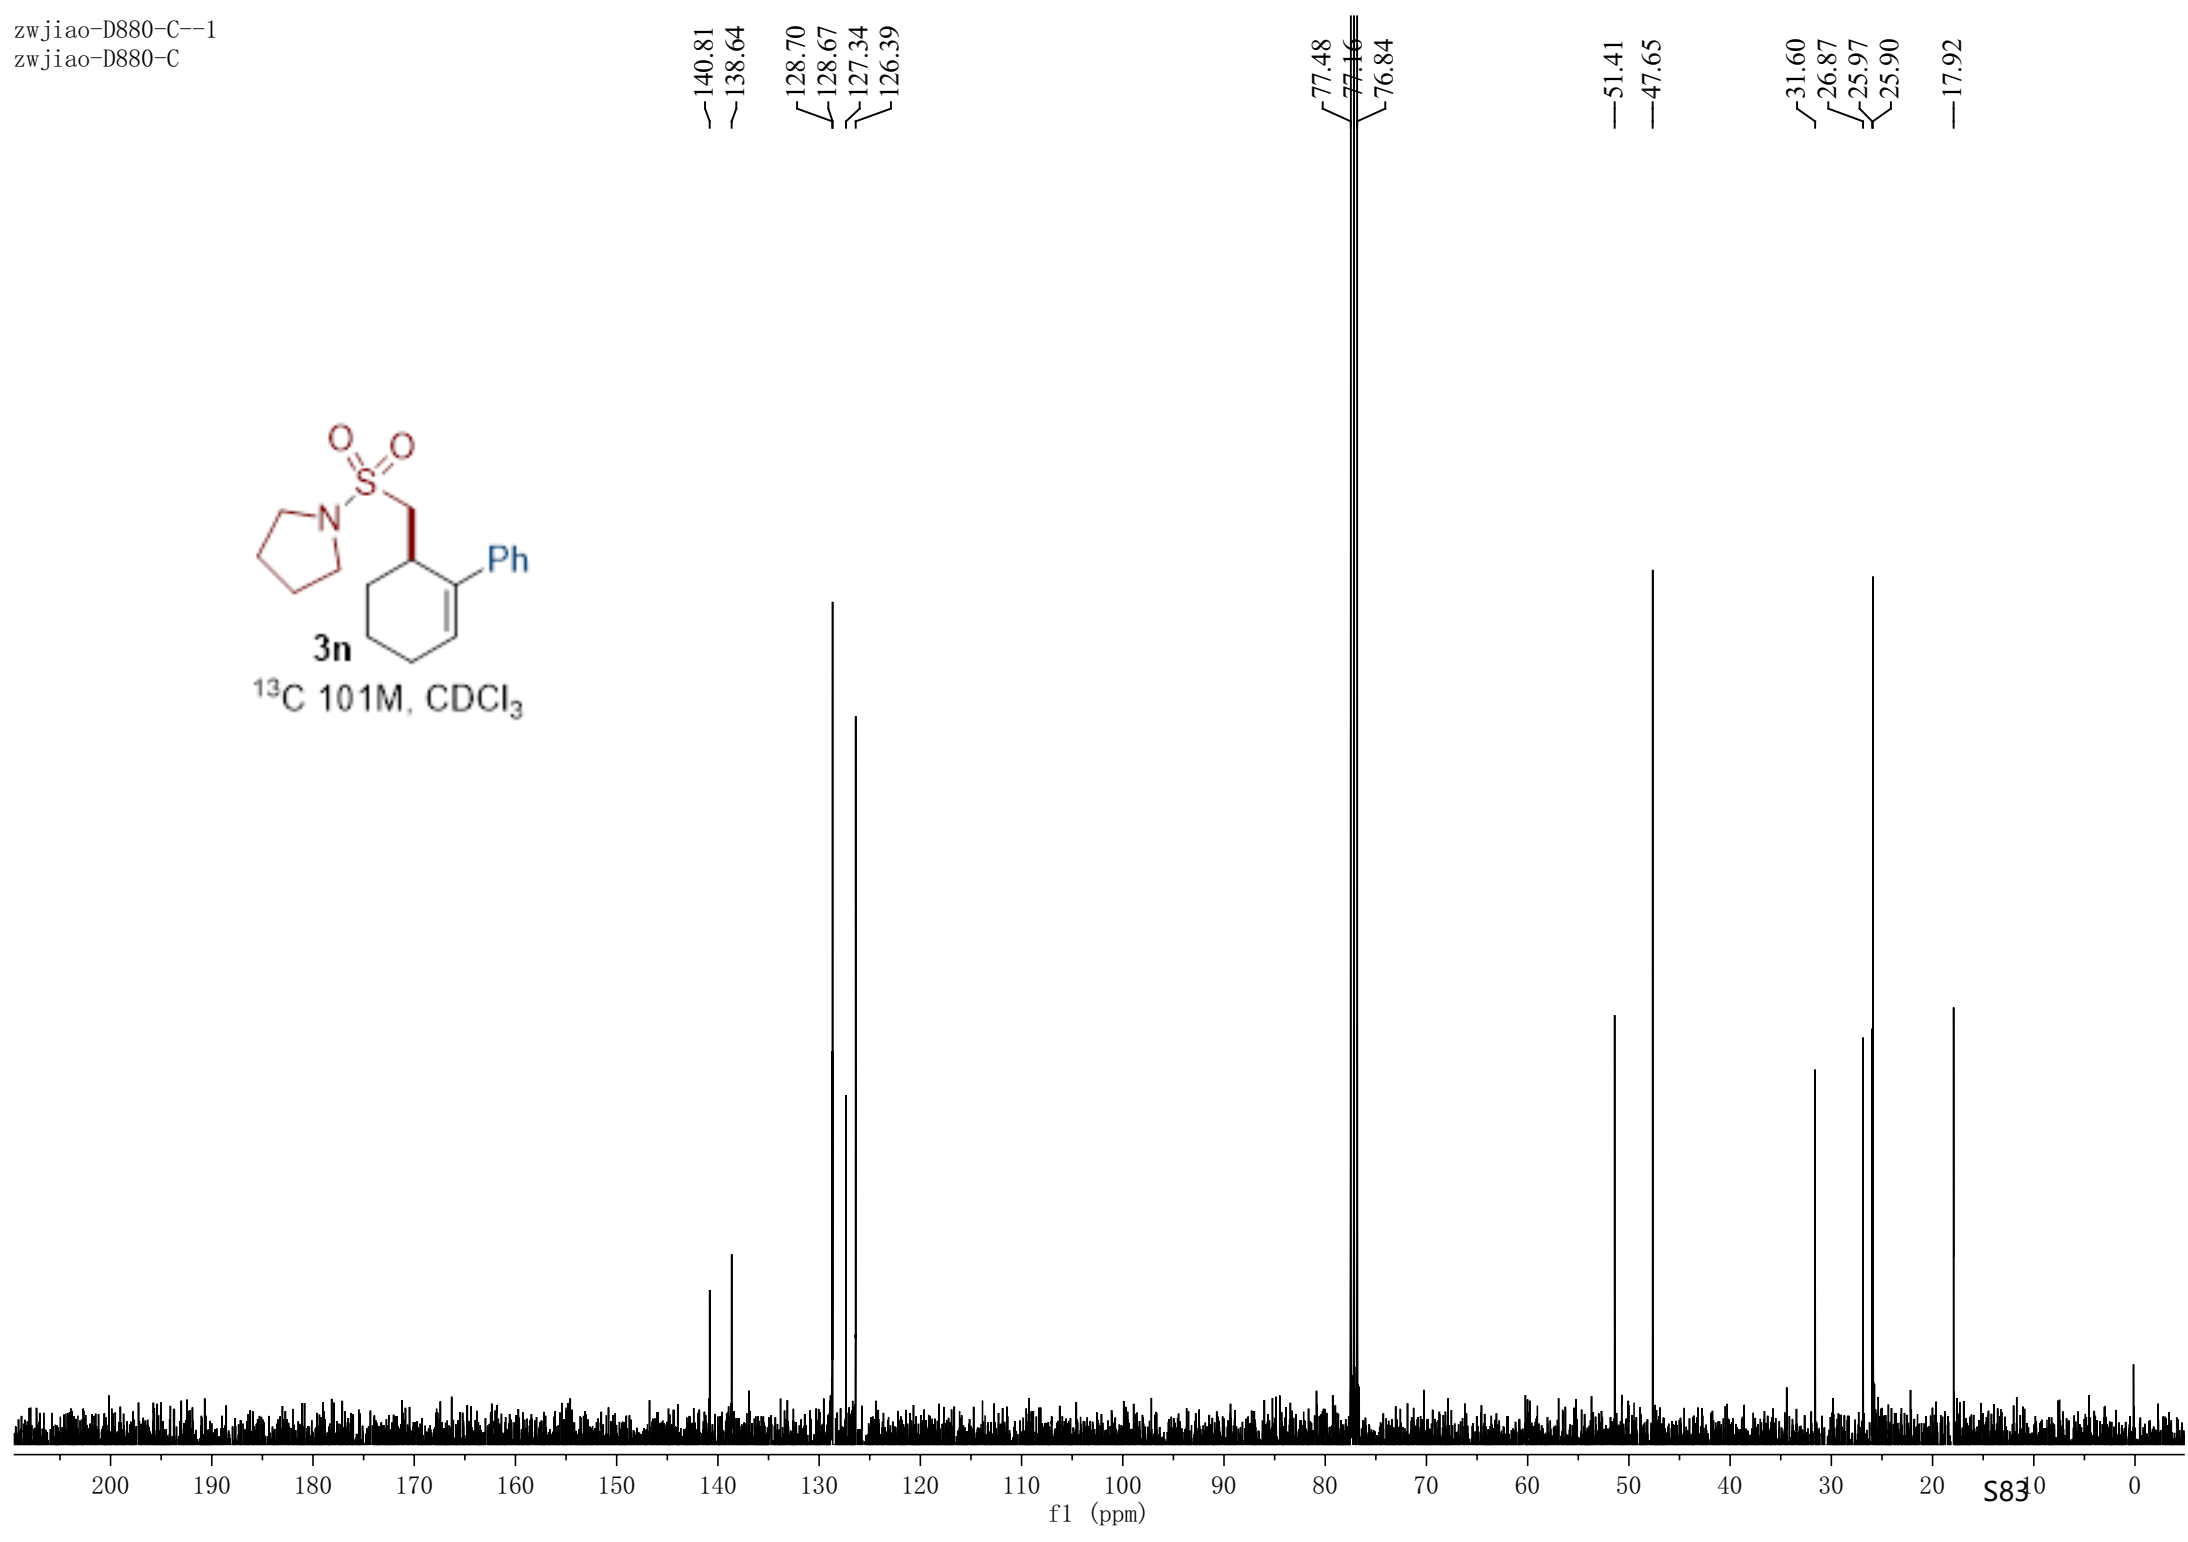

zwjiao-D890-H  
zwjiao-D890-H

7.35  
7.33  
7.29  
7.28  
7.27  
7.26  
7.25  
7.24

6.10  
6.09  
6.08

3.69  
3.68  
3.67  
3.41

3.09  
3.08  
3.07  
2.81  
2.78  
2.26  
2.25  
2.24  
2.22  
2.22  
2.21  
2.20  
2.19  
2.00  
1.96  
1.75  
1.73  
1.72  
1.64  
1.63  
1.62  
1.61

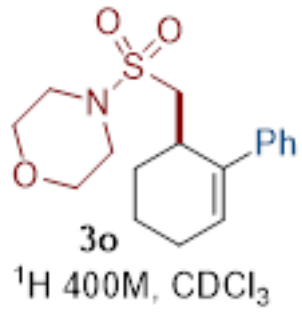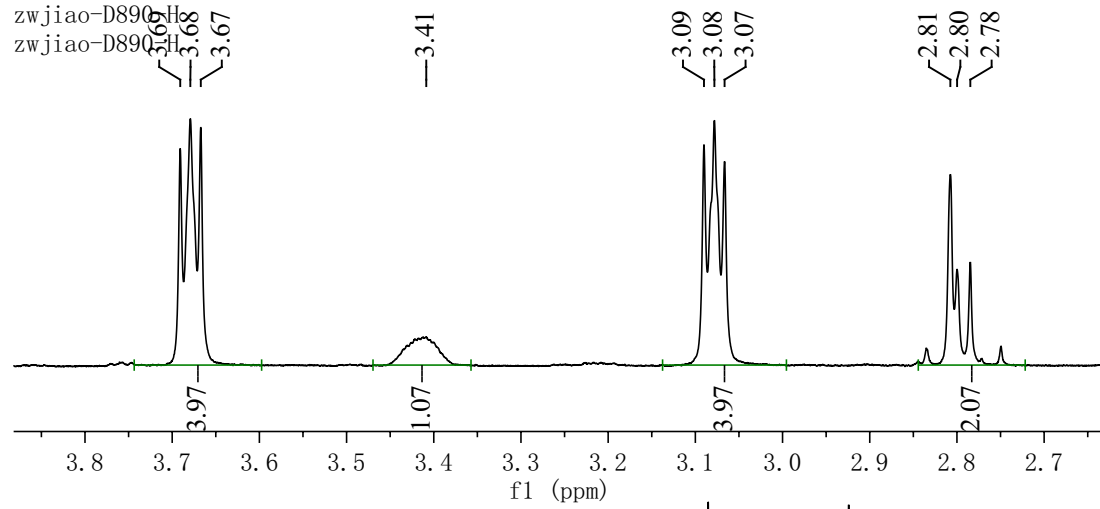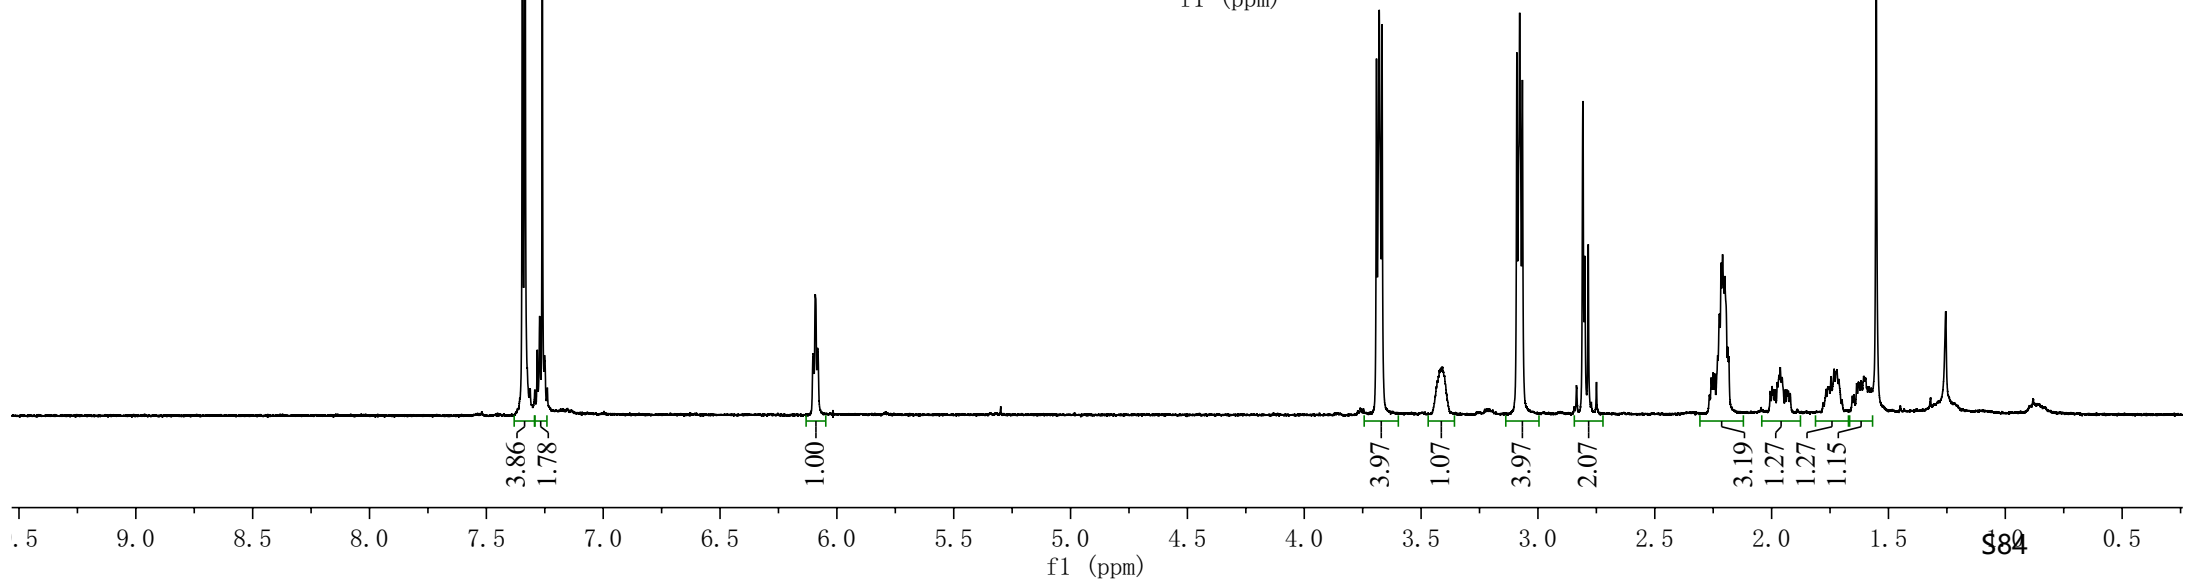

zwjiao-D890-C  
zwjiao-D890-C

~140.78  
~138.66

↘128.98  
↘128.77  
↘127.47  
↘126.35

77.48  
77.16  
76.84

—66.60

—50.43  
—45.71

~31.37  
↘26.92  
~25.93

—17.93

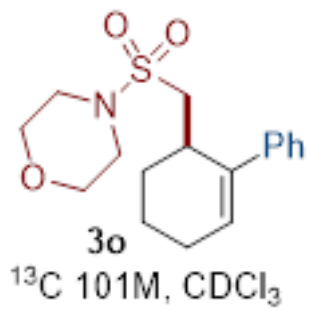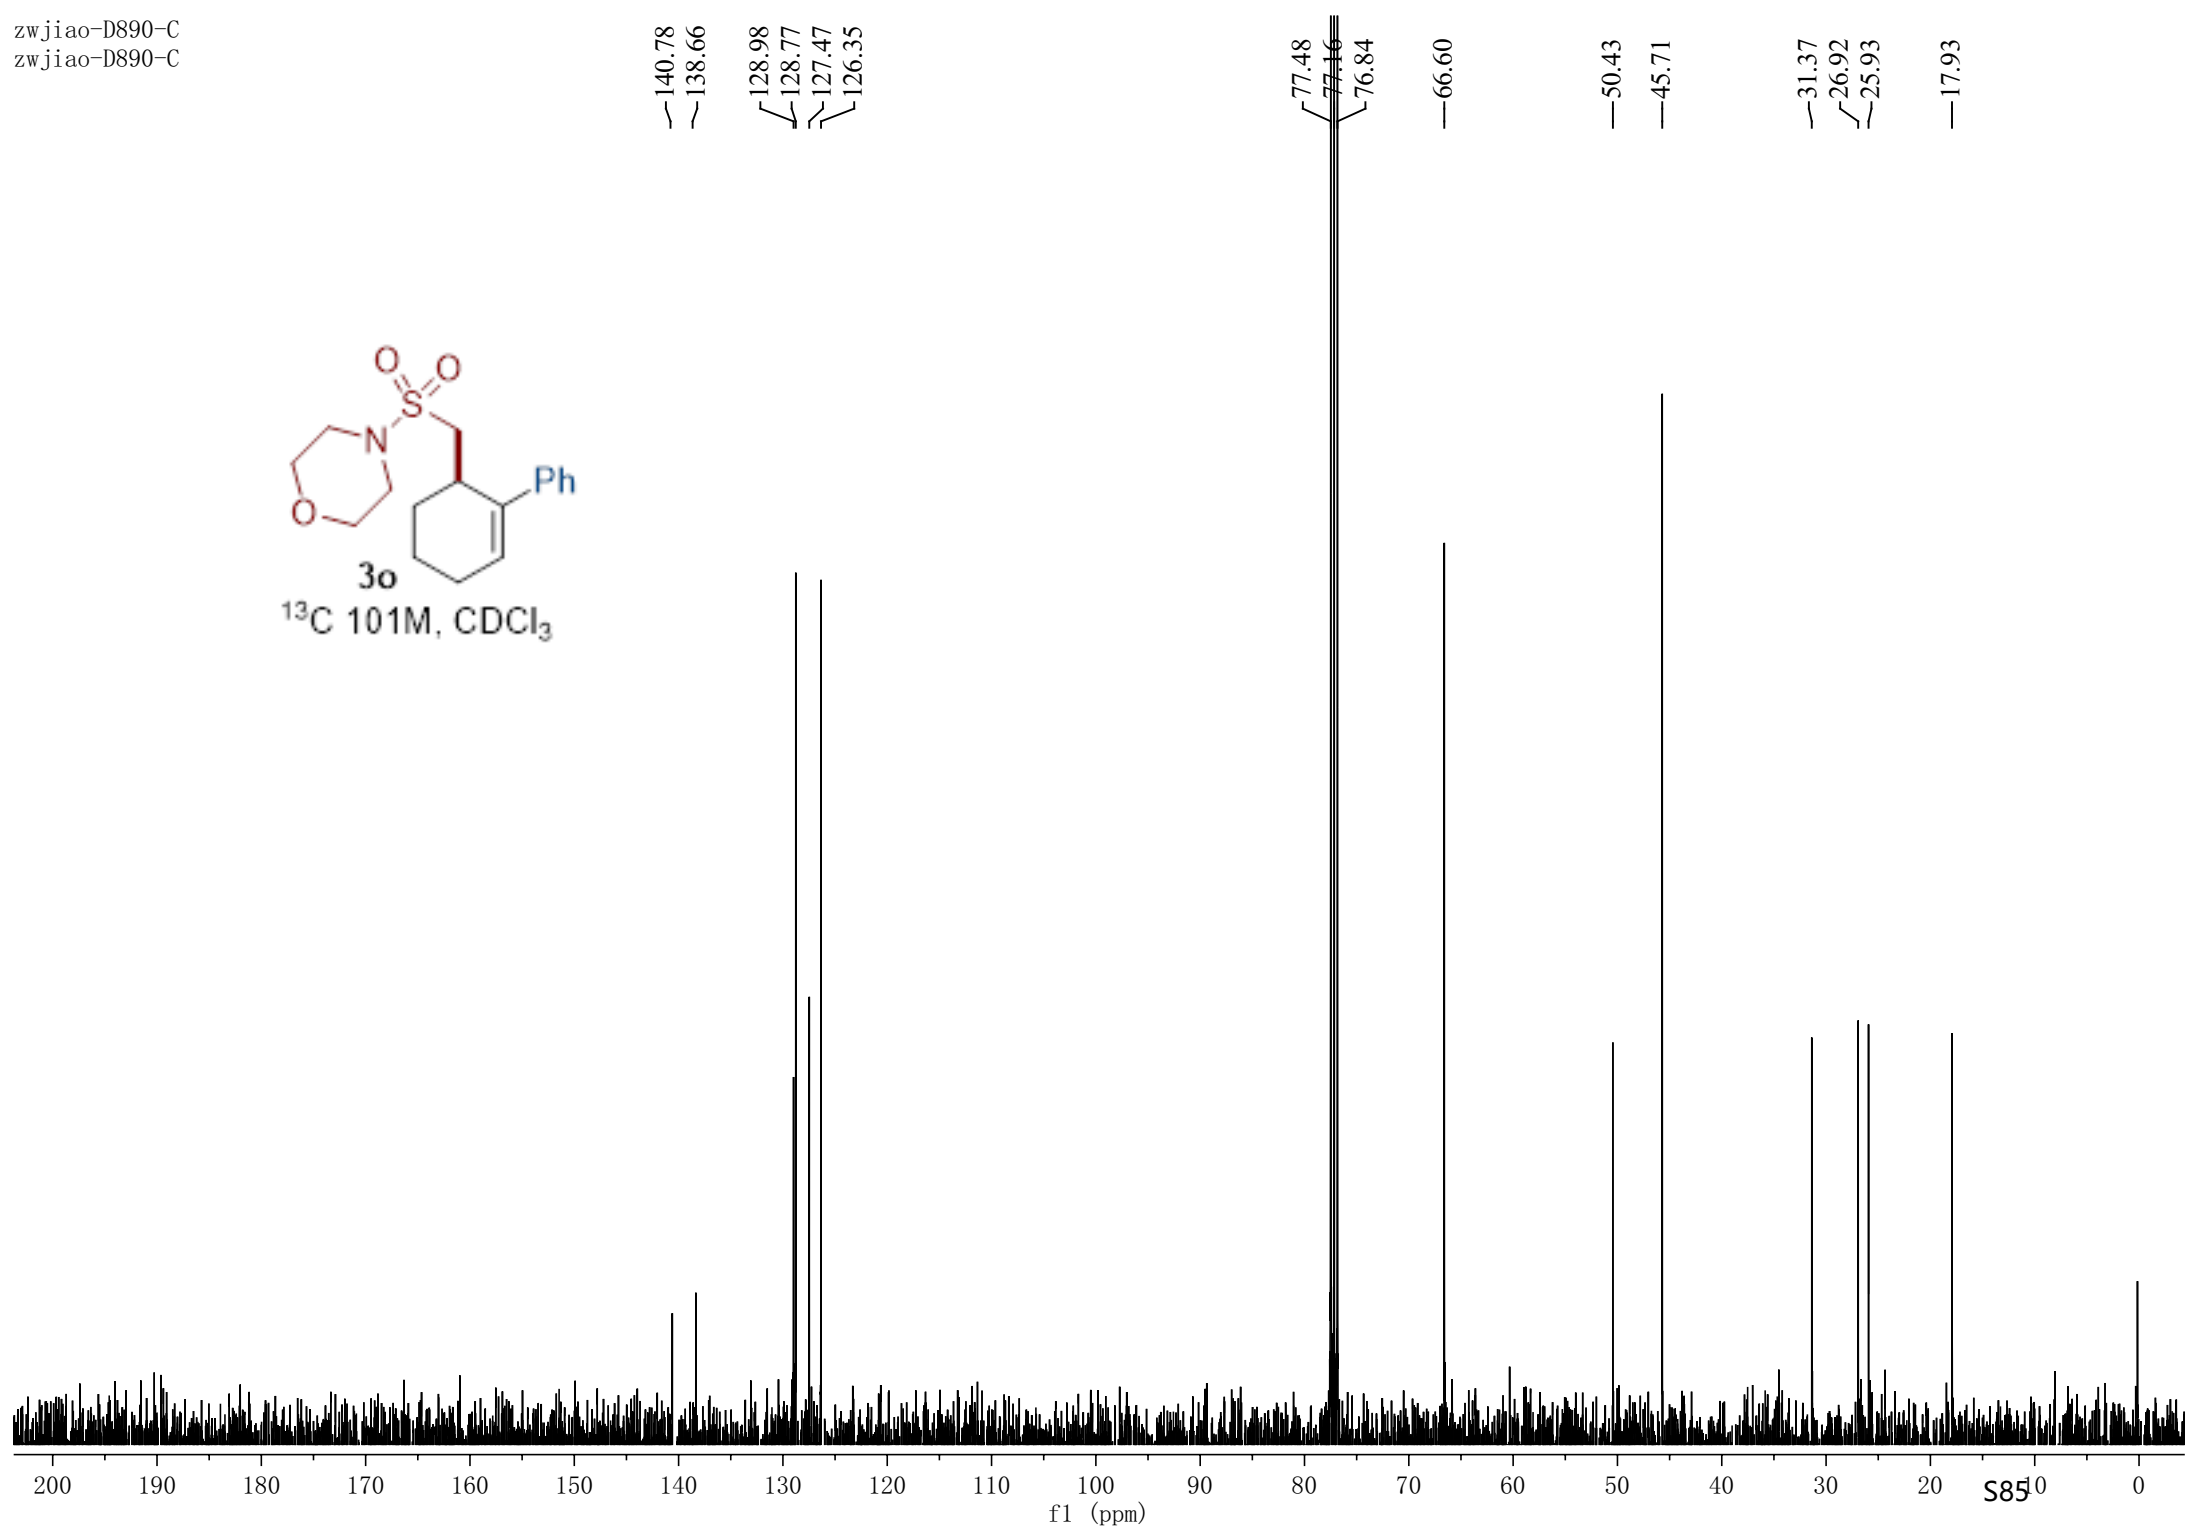

zwjiao-D849-H  
zwjiao-D849-H

7.40  
7.32  
7.31  
7.30  
7.30  
7.30  
7.28  
7.28  
7.27  
7.26  
7.25  
7.25  
7.17  
7.16  
7.15  
6.05  
6.04  
6.03

4.07

3.48

2.83  
2.83  
2.80  
2.78  
2.77  
2.74  
2.19  
2.18  
2.17  
2.17  
2.16  
2.15  
2.00  
2.00  
1.99  
1.97  
1.96  
1.70  
1.69  
1.68  
1.67  
1.55  
1.55  
1.53  
1.53

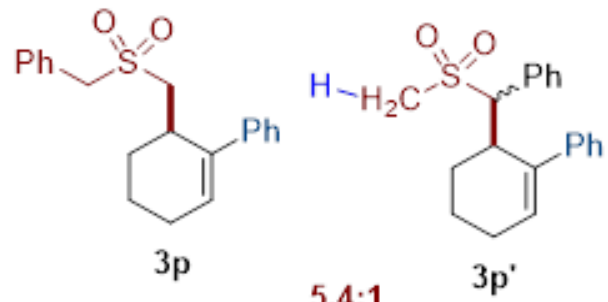

10.0 9.5 9.0 8.5 8.0 7.5 7.0 6.5 6.0 5.5 5.0 4.5 4.0 3.5 3.0 2.5 2.0 1.5 1.0 0.5 0.0 -0

f1 (ppm)

7.99  
1.81  
0.90  
2.00  
1.06  
2.05  
3.21  
1.27  
1.08  
1.01

586

zwjiao-D849-C  
zwjiao-D849-C

140.59  
138.26  
130.65  
129.12  
129.00  
128.94  
128.78  
127.97  
127.37  
126.35

77.48  
77.16  
76.84

60.76

53.27

30.41  
27.34  
25.78

17.77

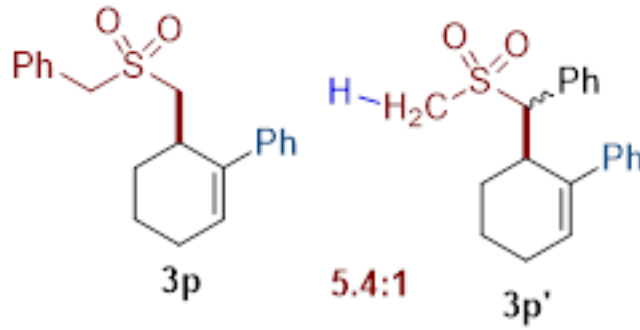

<sup>13</sup>C 101M, CDCl<sub>3</sub>

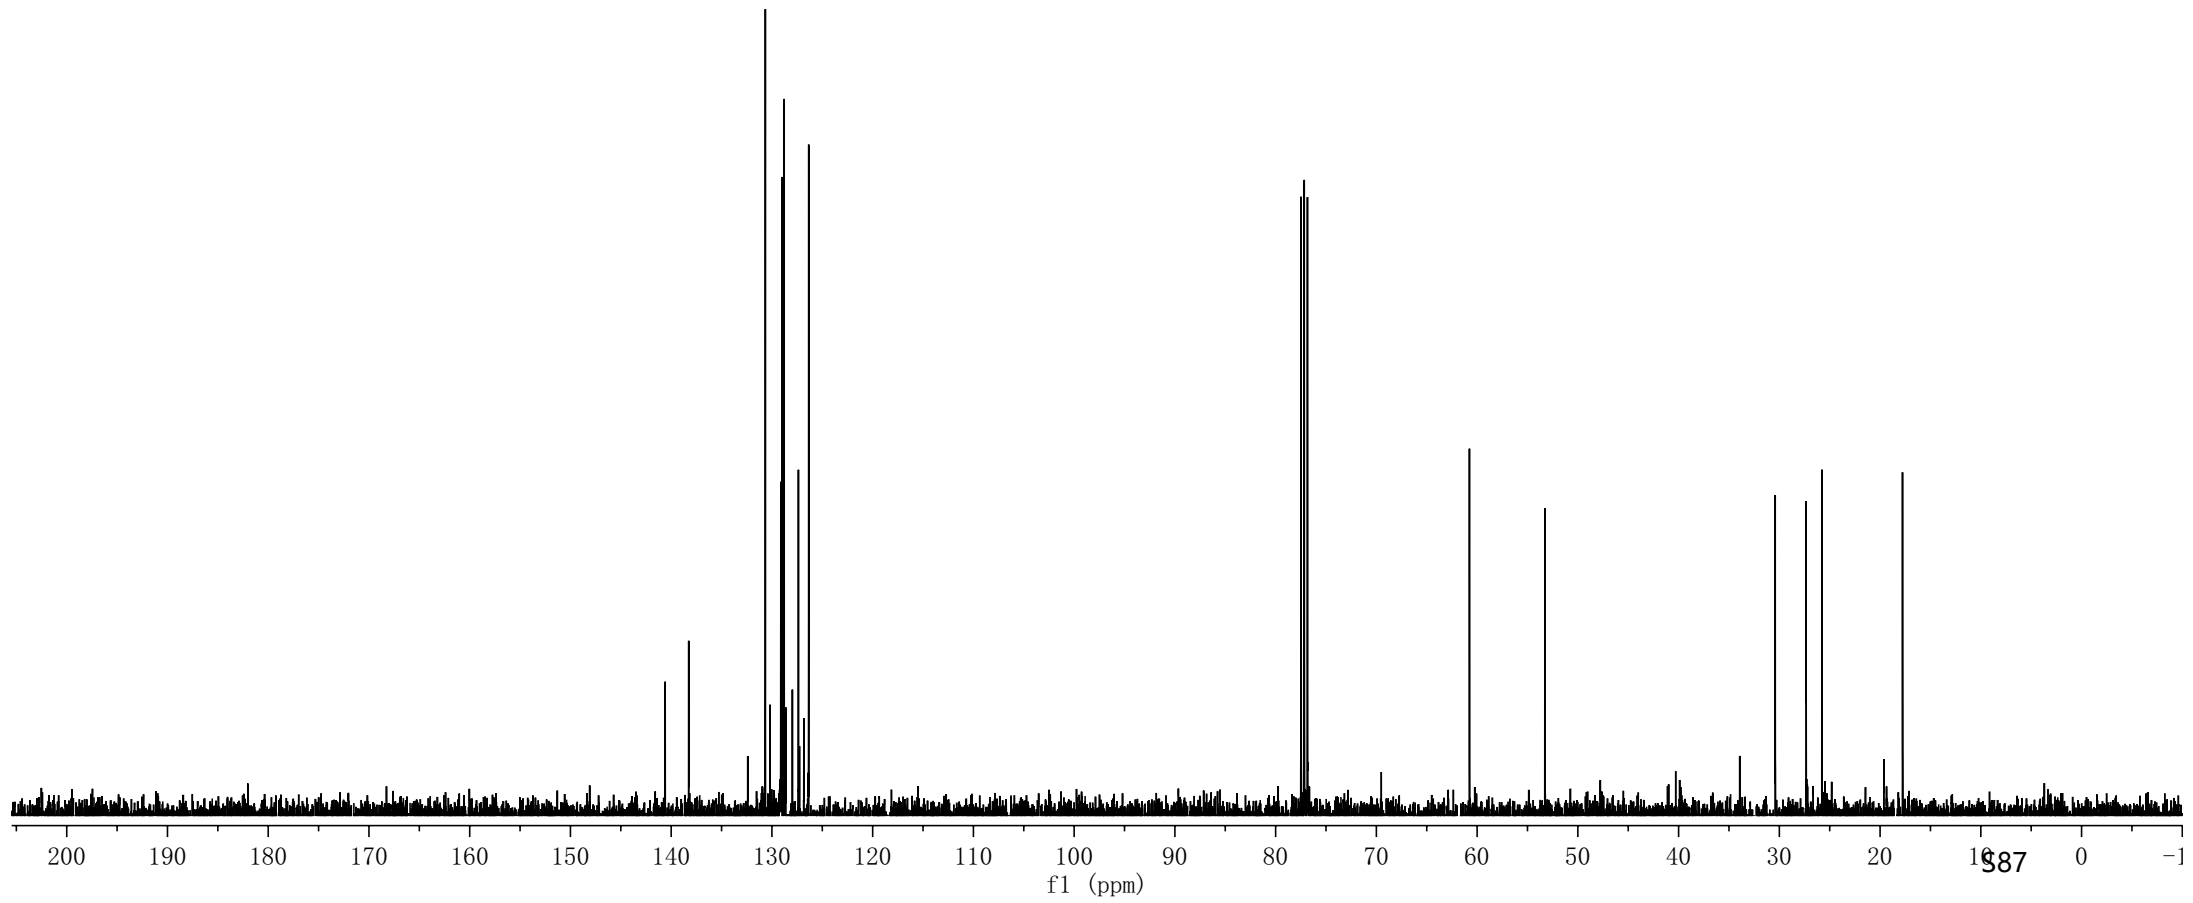

zwjiao-D779-H

zwjiao-D779-H-1

7.80  
7.79  
7.78  
7.77  
7.68  
7.68  
7.66  
7.65  
7.63  
7.62  
7.62  
7.50  
7.48  
7.47  
7.46  
7.45  
7.44  
7.44  
7.26  
7.24  
7.24  
7.22  
7.22  
6.20  
6.19  
6.18

3.42  
3.15  
3.13  
3.12  
3.09  
3.03  
2.99

2.38  
2.37  
2.37  
2.35  
2.35  
2.34  
2.33  
2.24  
2.24  
2.23  
1.97  
1.96  
1.93  
1.78  
1.77  
1.76  
1.75  
1.74  
1.66  
1.65  
1.64

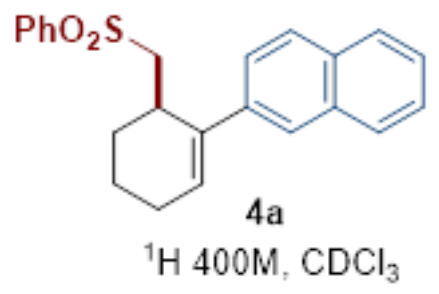

zwjiao-D779-H  
zwjiao-D779-H-1

7.80  
7.79  
7.78  
7.77  
7.68  
7.68  
7.66  
7.65  
7.63  
7.62  
7.50  
7.48  
7.47  
7.46  
7.45  
7.44  
7.44  
7.26  
7.24  
7.24  
7.22  
7.22

zwjiao-D779-H  
zwjiao-D779-H-1

3.15  
3.13  
3.12  
3.09  
3.03  
2.99

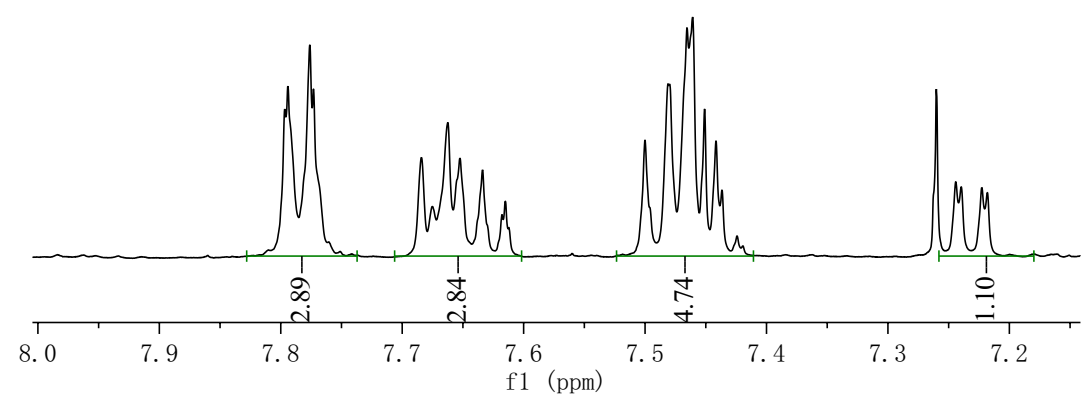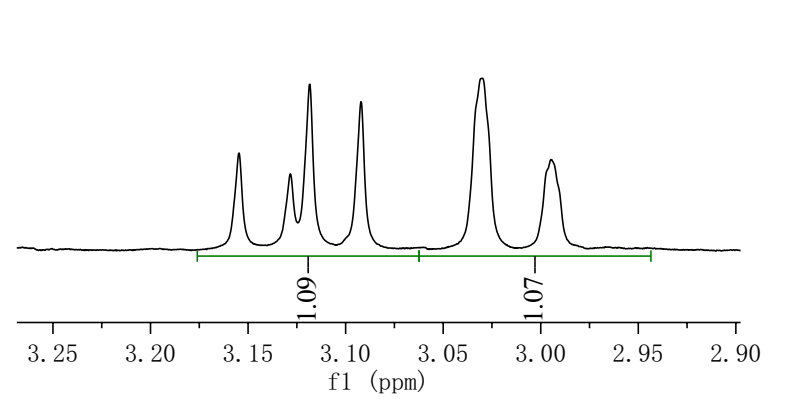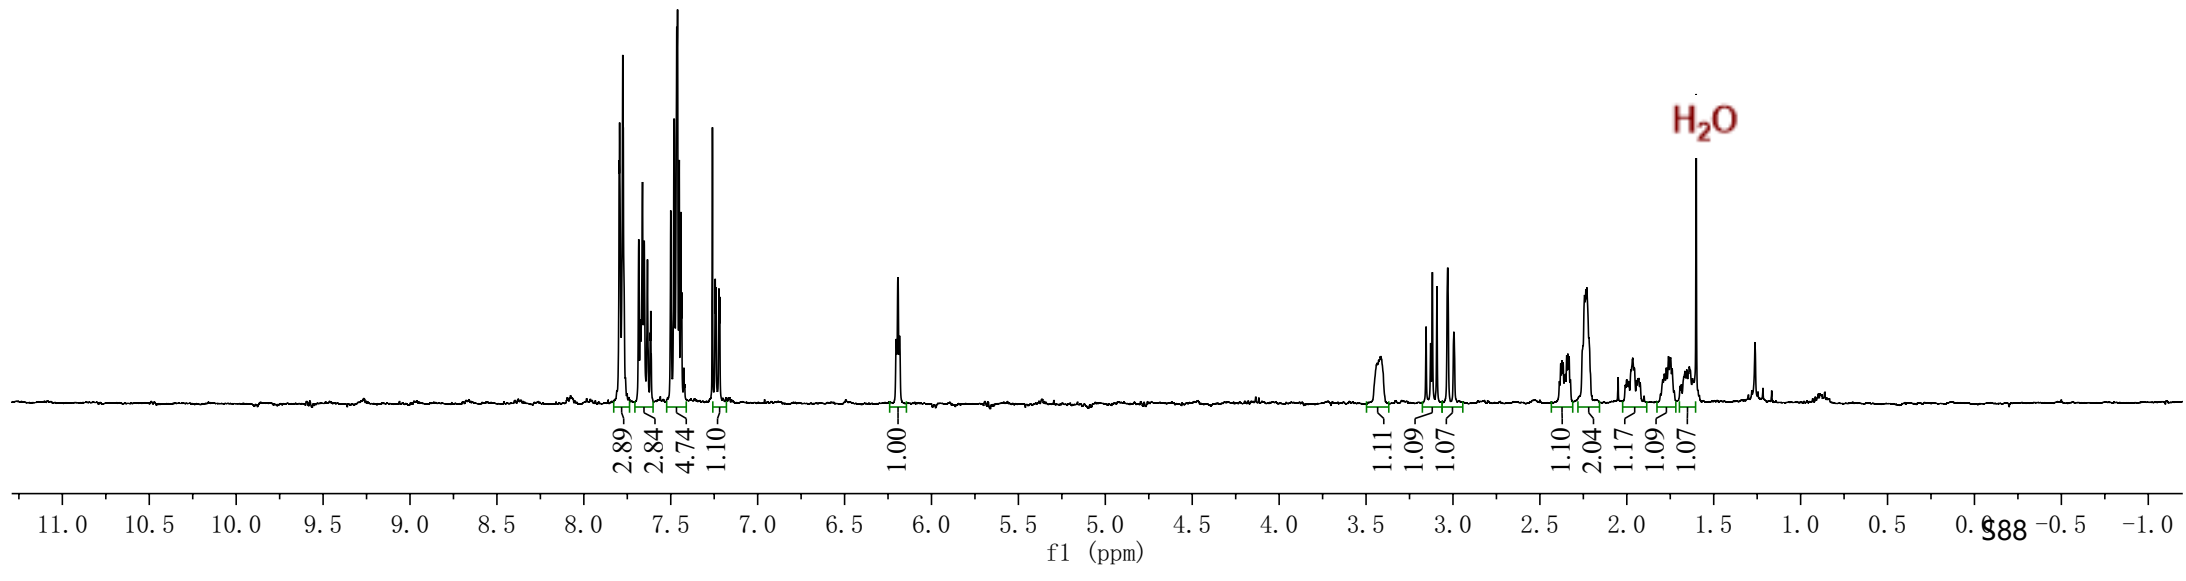



zwjiao-D779-C  
zwjiao-D779-C

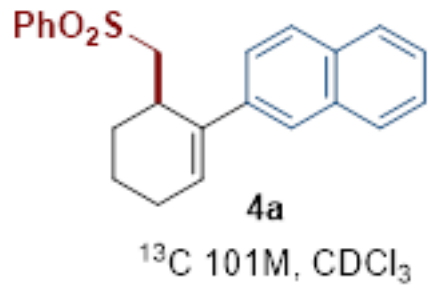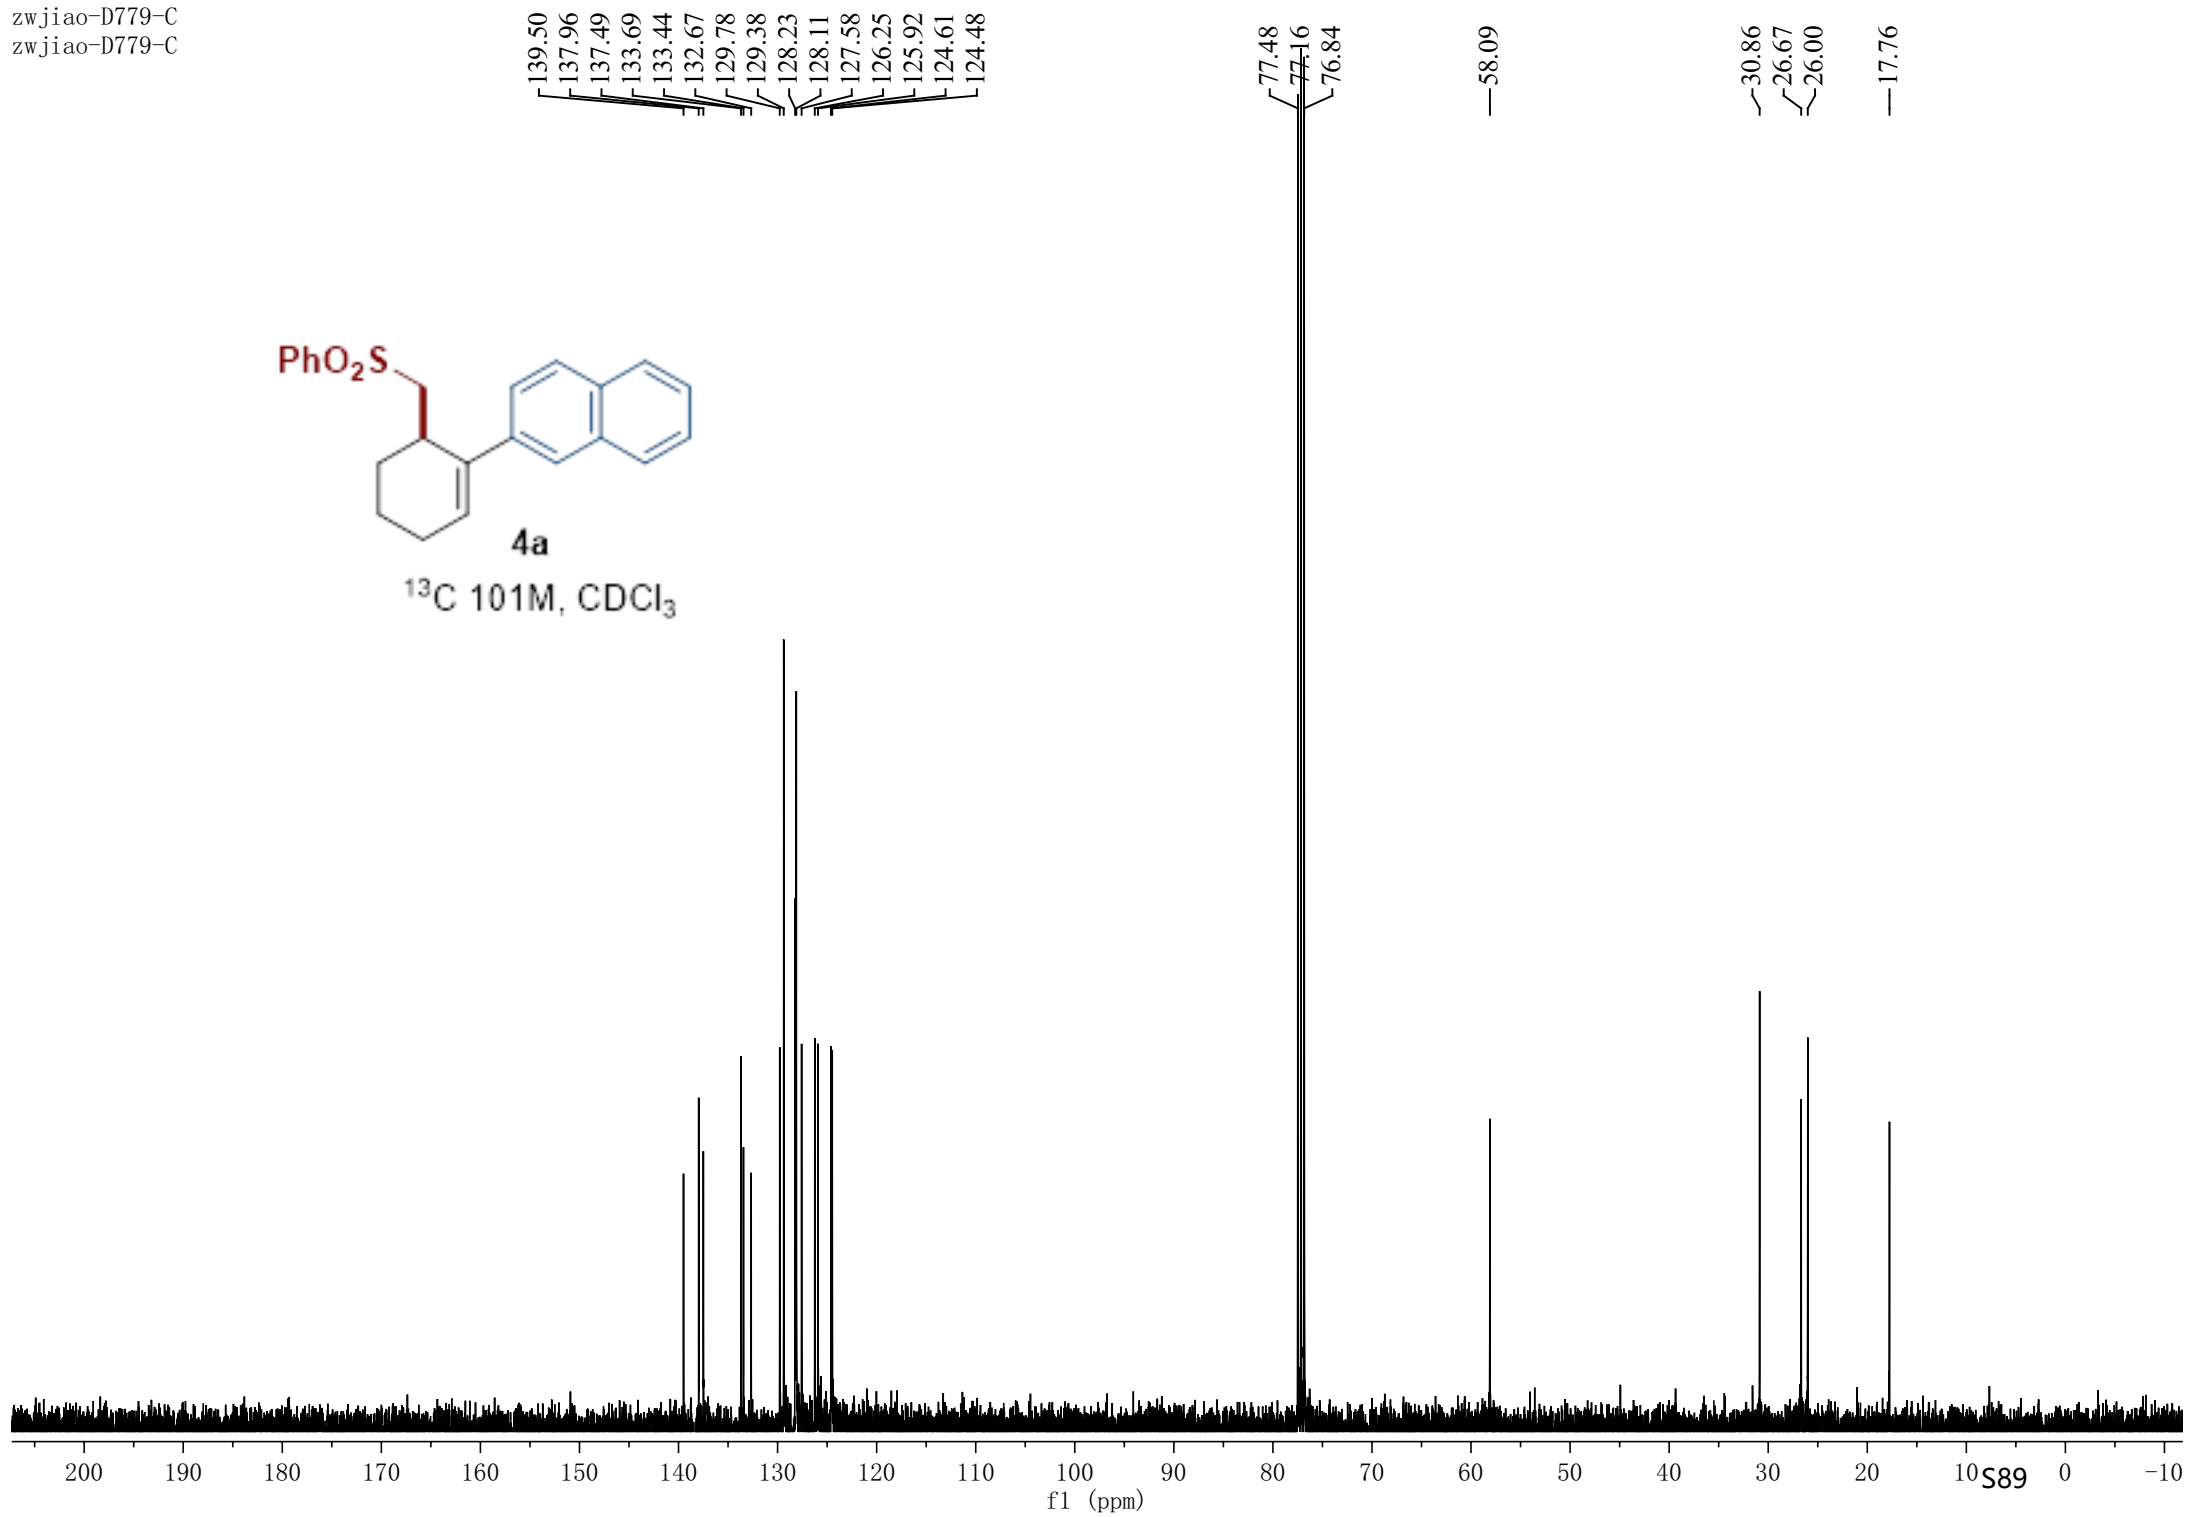

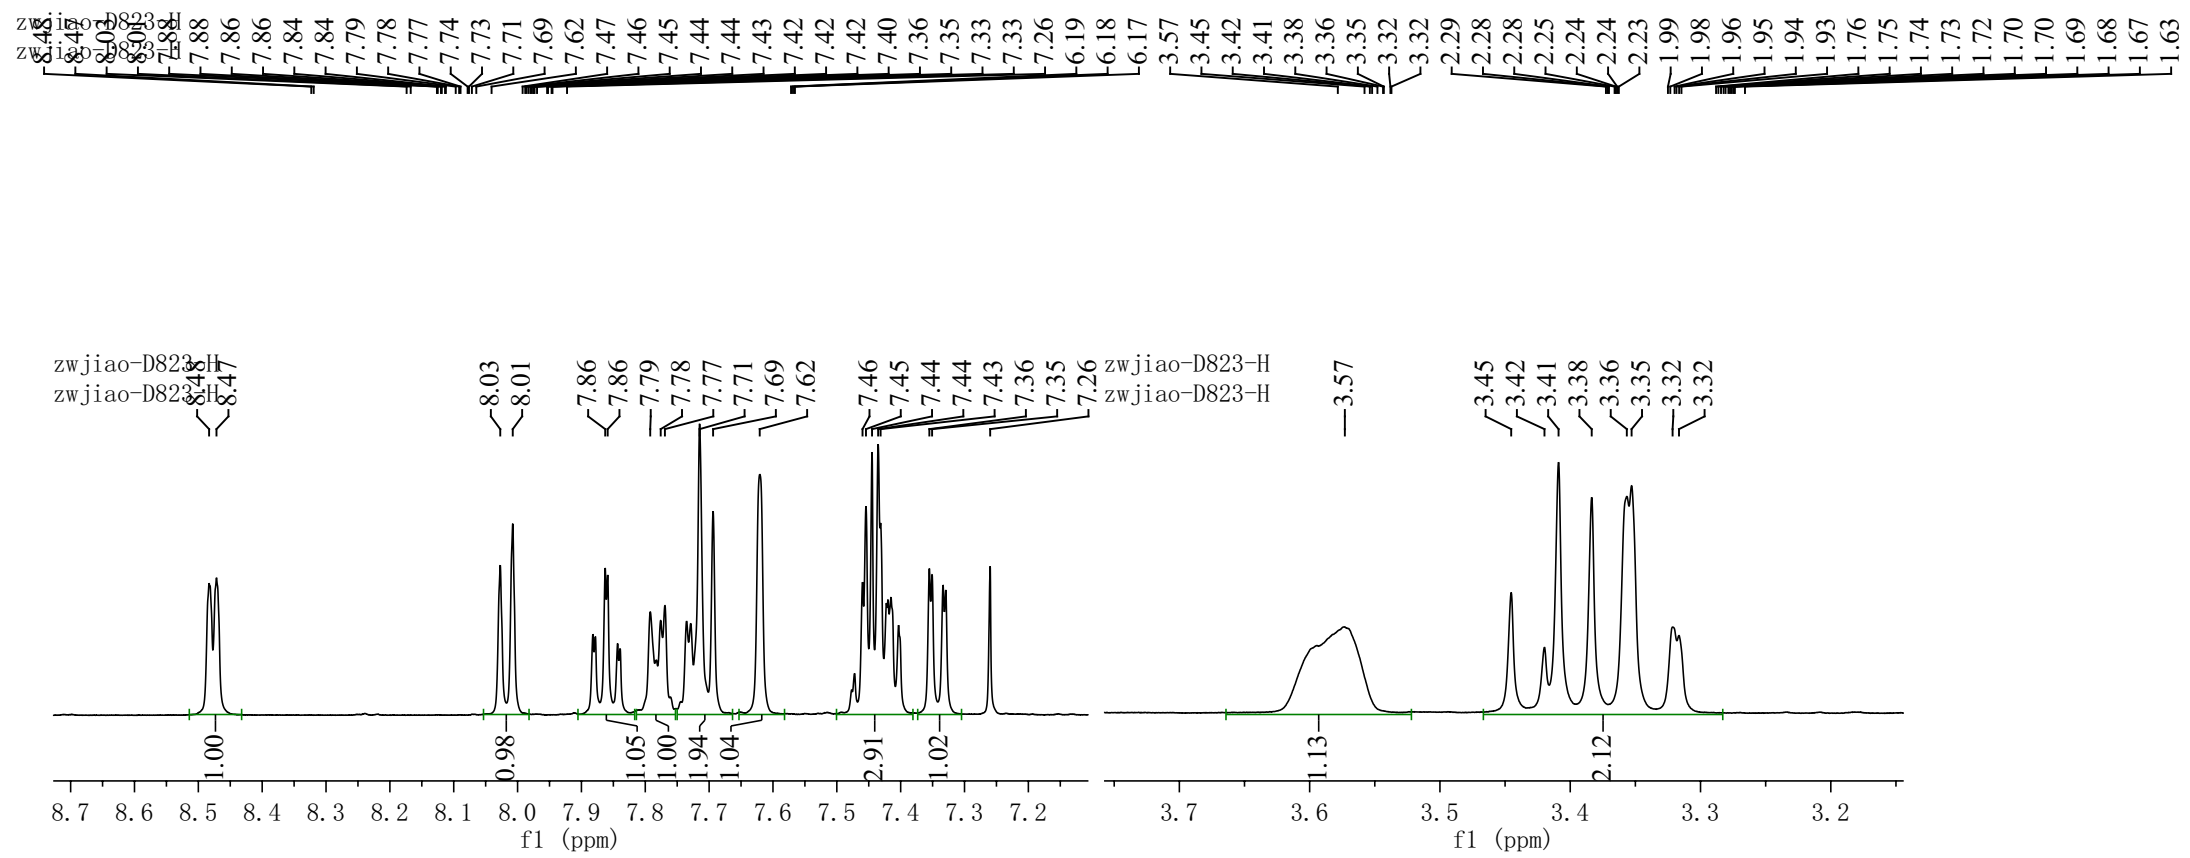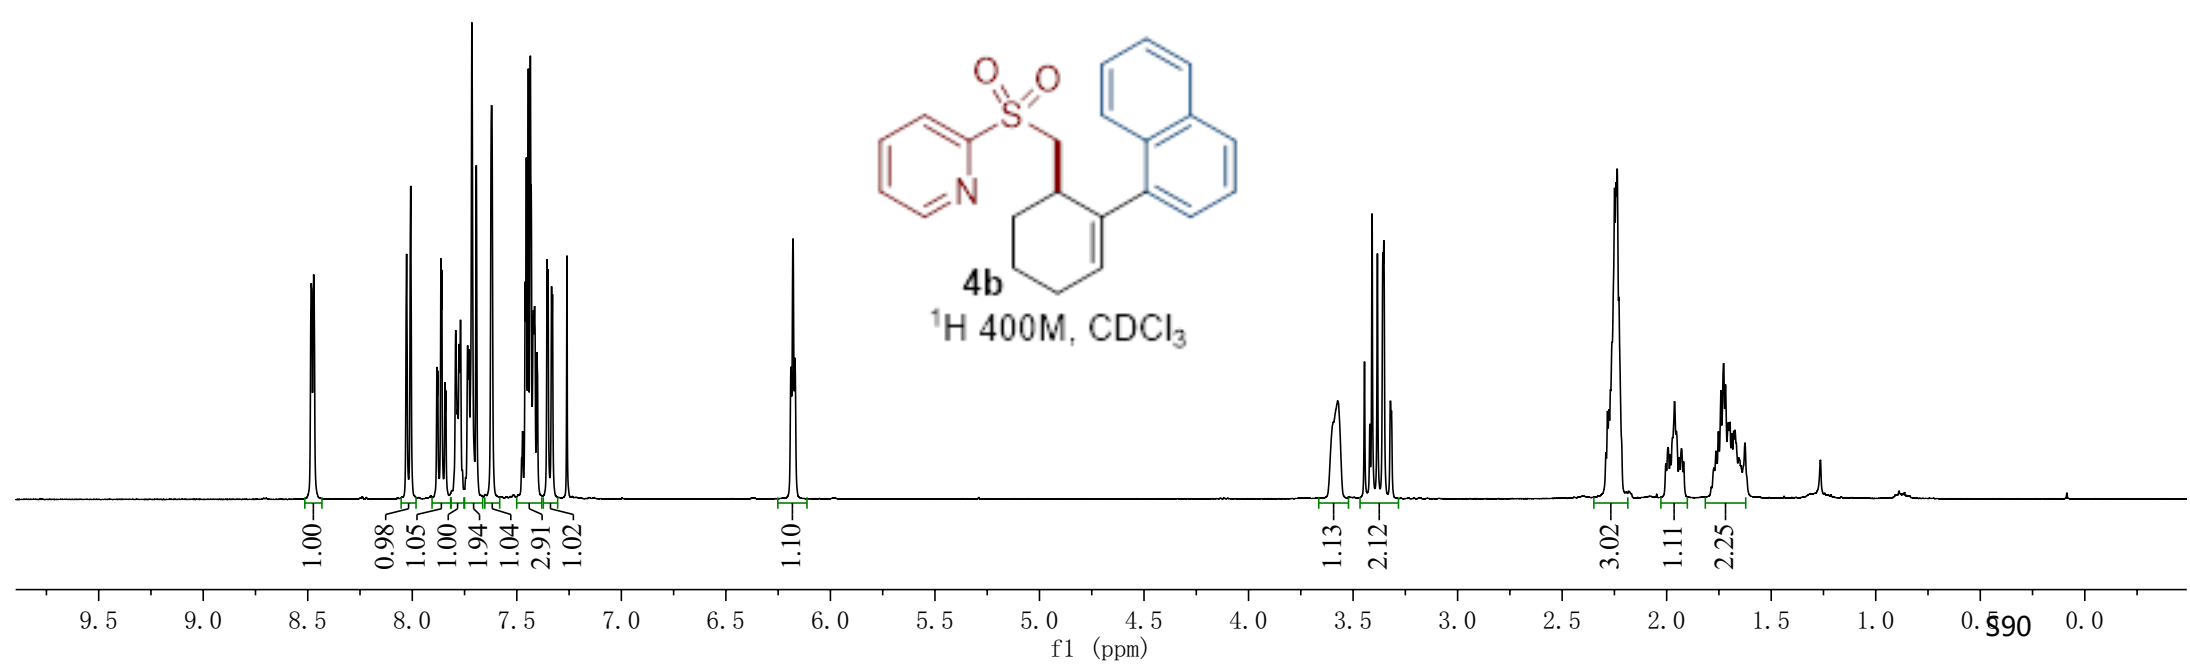

zwjiao-D823-C  
zwjiao-D823-C

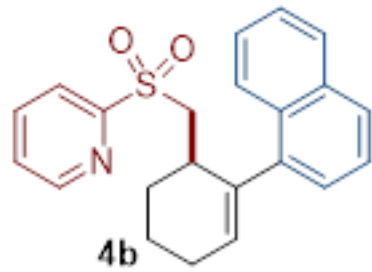

<sup>13</sup>C 101M, CDCl<sub>3</sub>

—157.60  
—150.20  
138.25  
138.10  
137.76  
133.49  
132.69  
129.67  
128.26  
128.15  
127.56  
127.28  
126.19  
125.87  
124.83  
124.82  
122.02

77.48  
77.16  
76.84

—54.23

30.72  
27.06  
25.93

—17.63

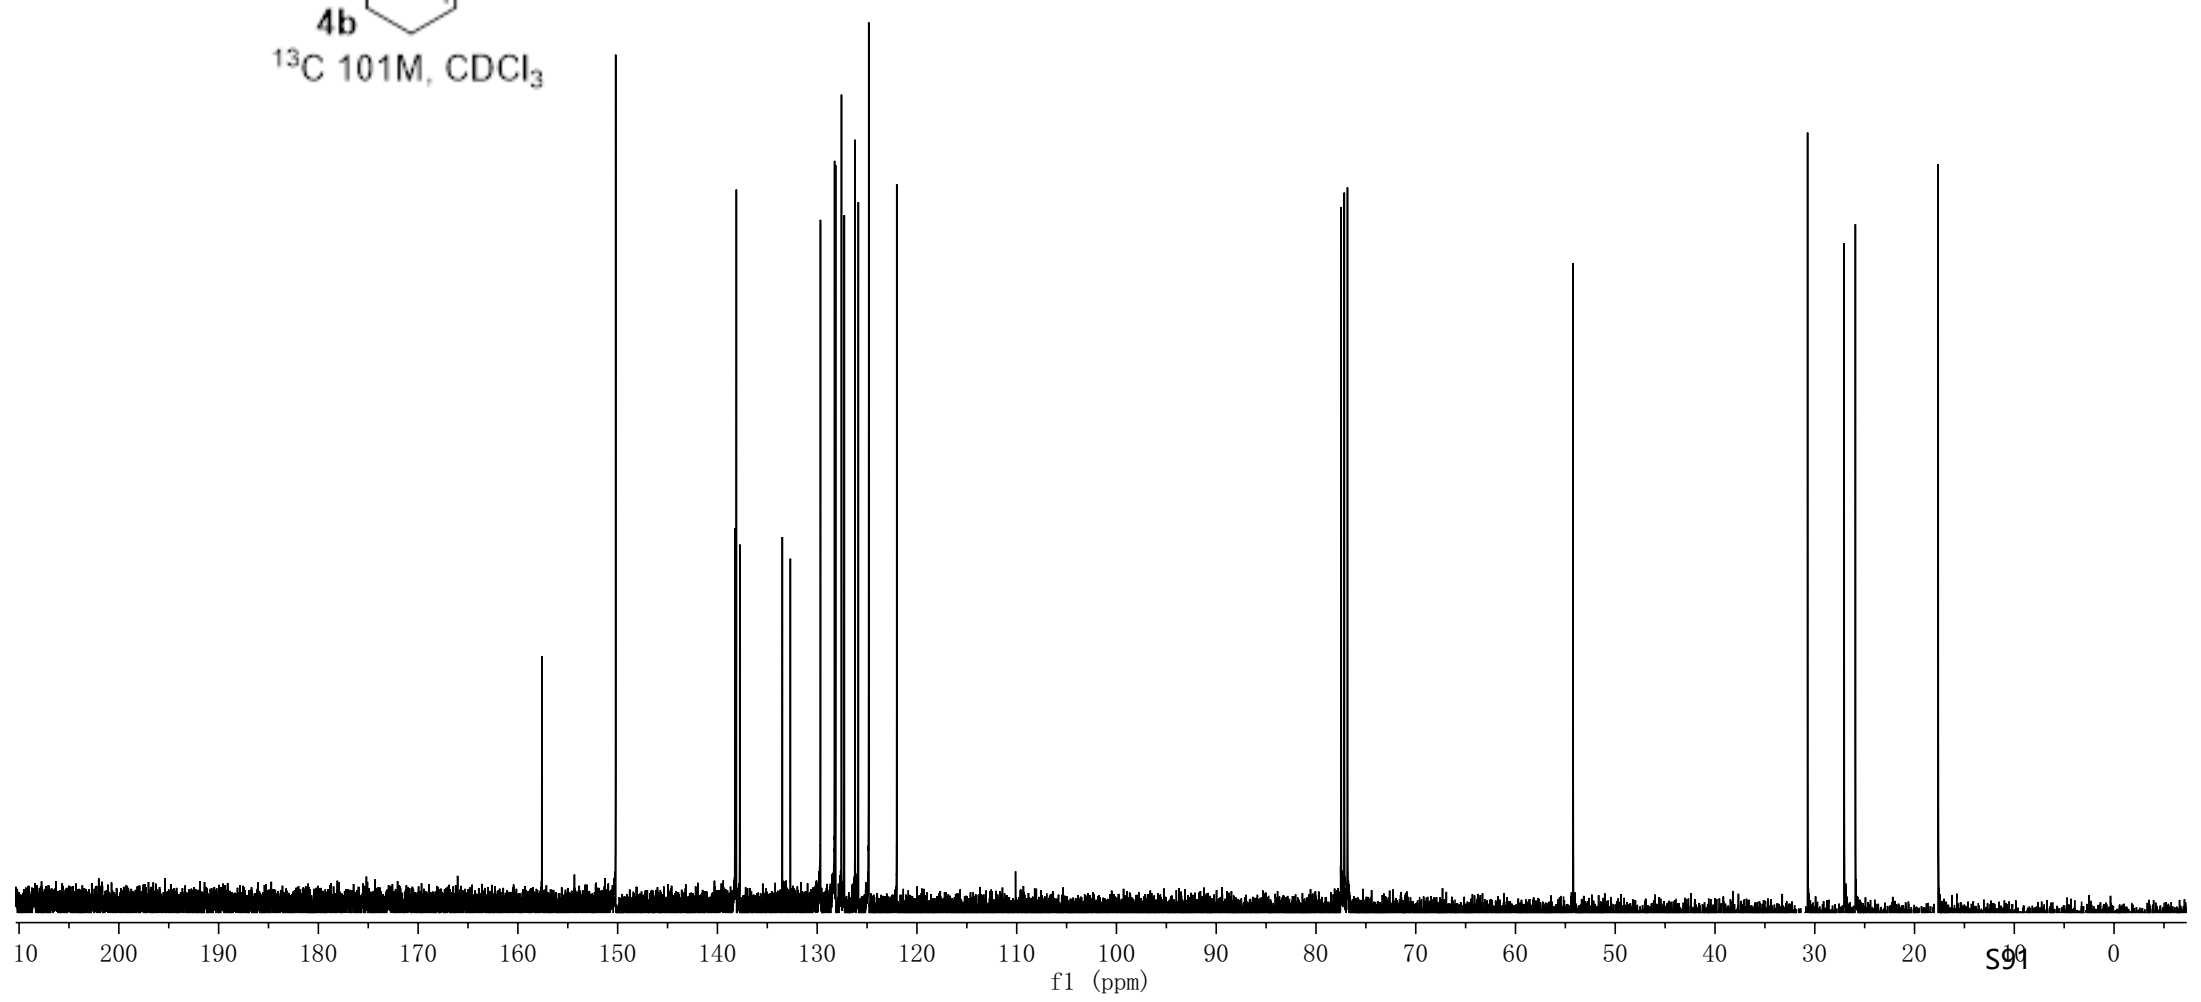

zwjiao-D793-H  
zwjiao-D793-H

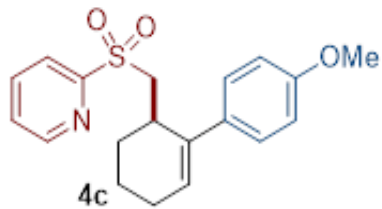

<sup>1</sup>H 400M, CDCl<sub>3</sub>

8.66  
8.65  
8.65  
8.05  
7.94  
7.93  
7.53  
7.52  
7.52  
7.26  
7.12  
7.10  
6.78  
6.76  
5.96  
5.95

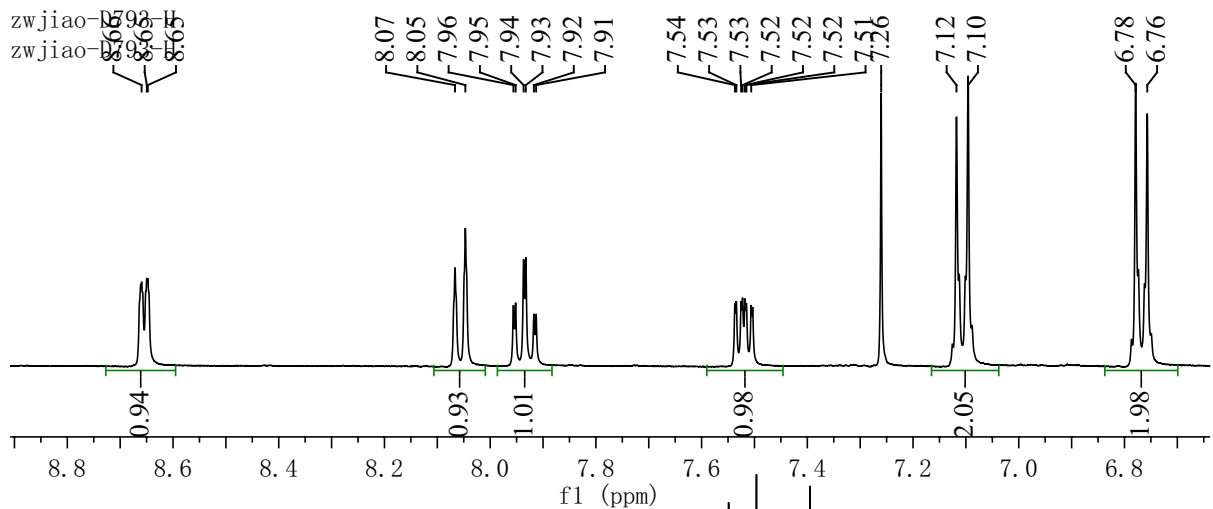

3.79  
3.40  
3.37  
3.34  
3.27  
3.24  
2.17  
2.16  
2.15  
1.89  
1.86  
1.83  
1.82  
1.70  
1.69  
1.68  
1.67  
1.66  
1.65  
1.63  
1.62  
1.61  
1.60

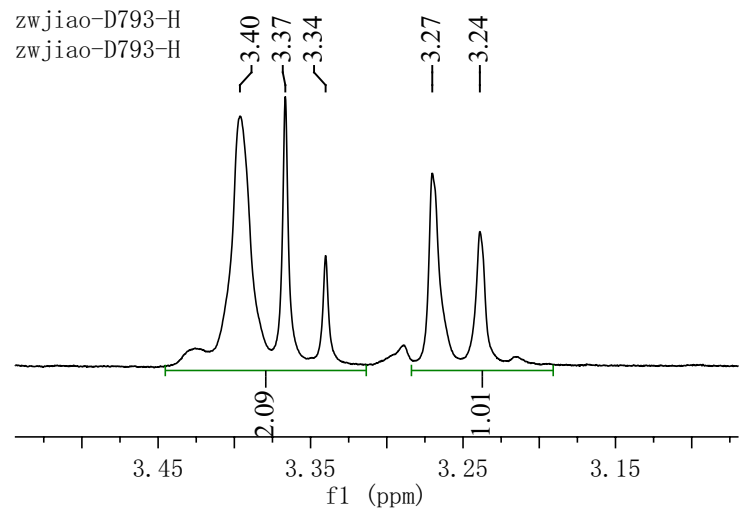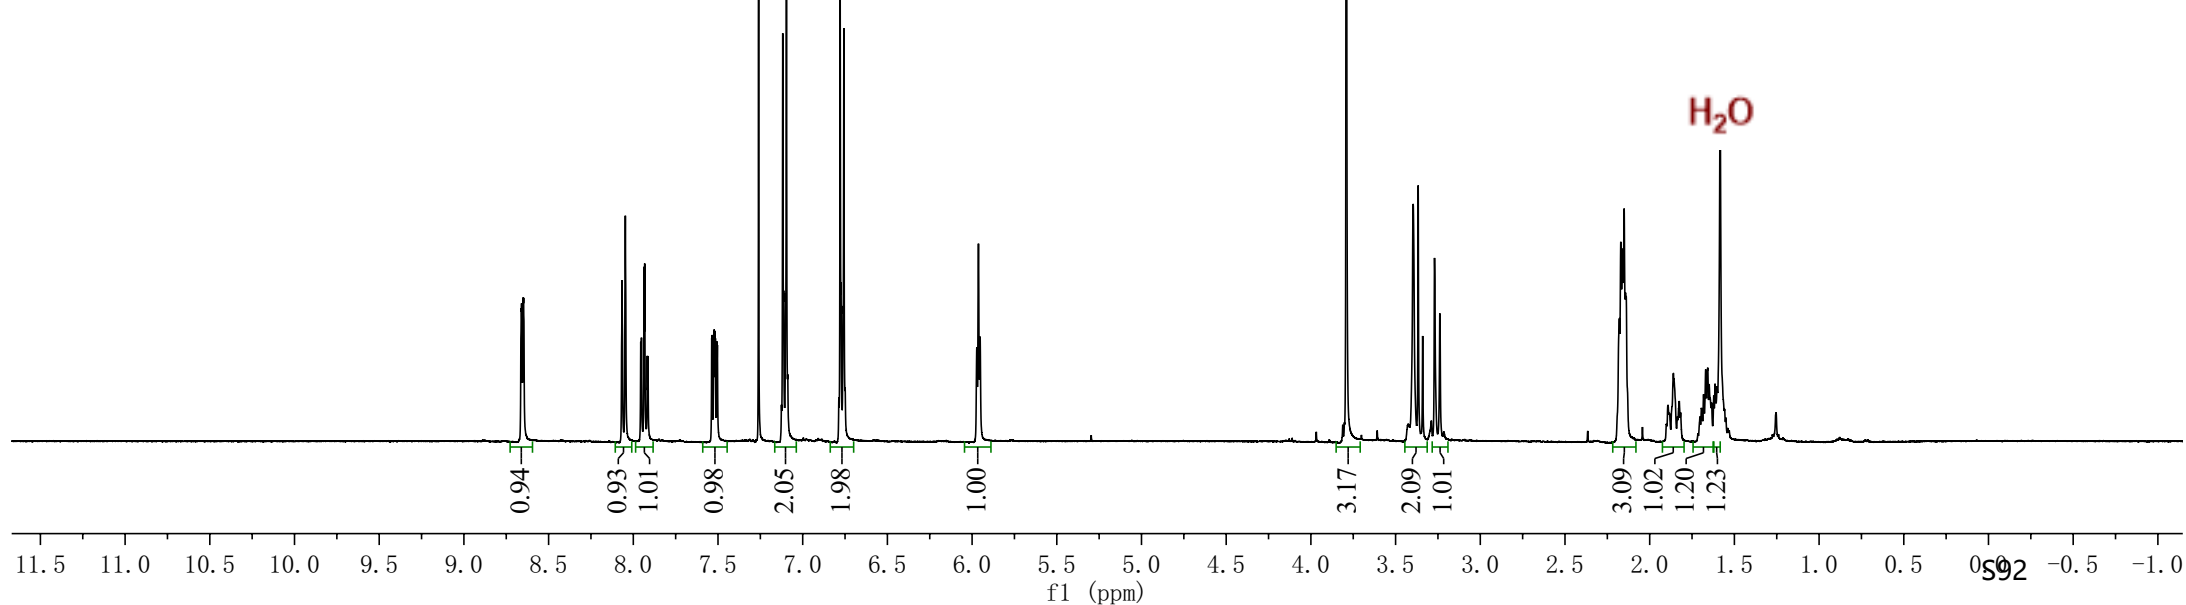

zwjiao-D793-C  
zwjiao-D793-C

158.91  
157.84  
150.31  
138.22  
137.66  
132.88  
127.67  
127.32  
122.18  
113.99

77.48  
77.16  
76.84

55.41  
54.21

30.69  
26.95  
25.81  
17.59

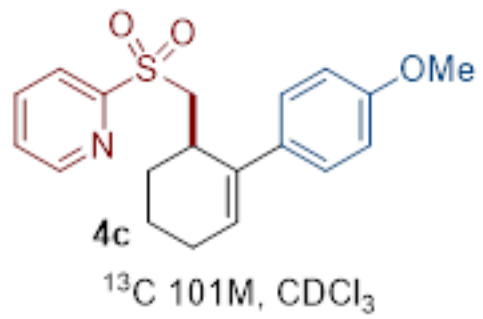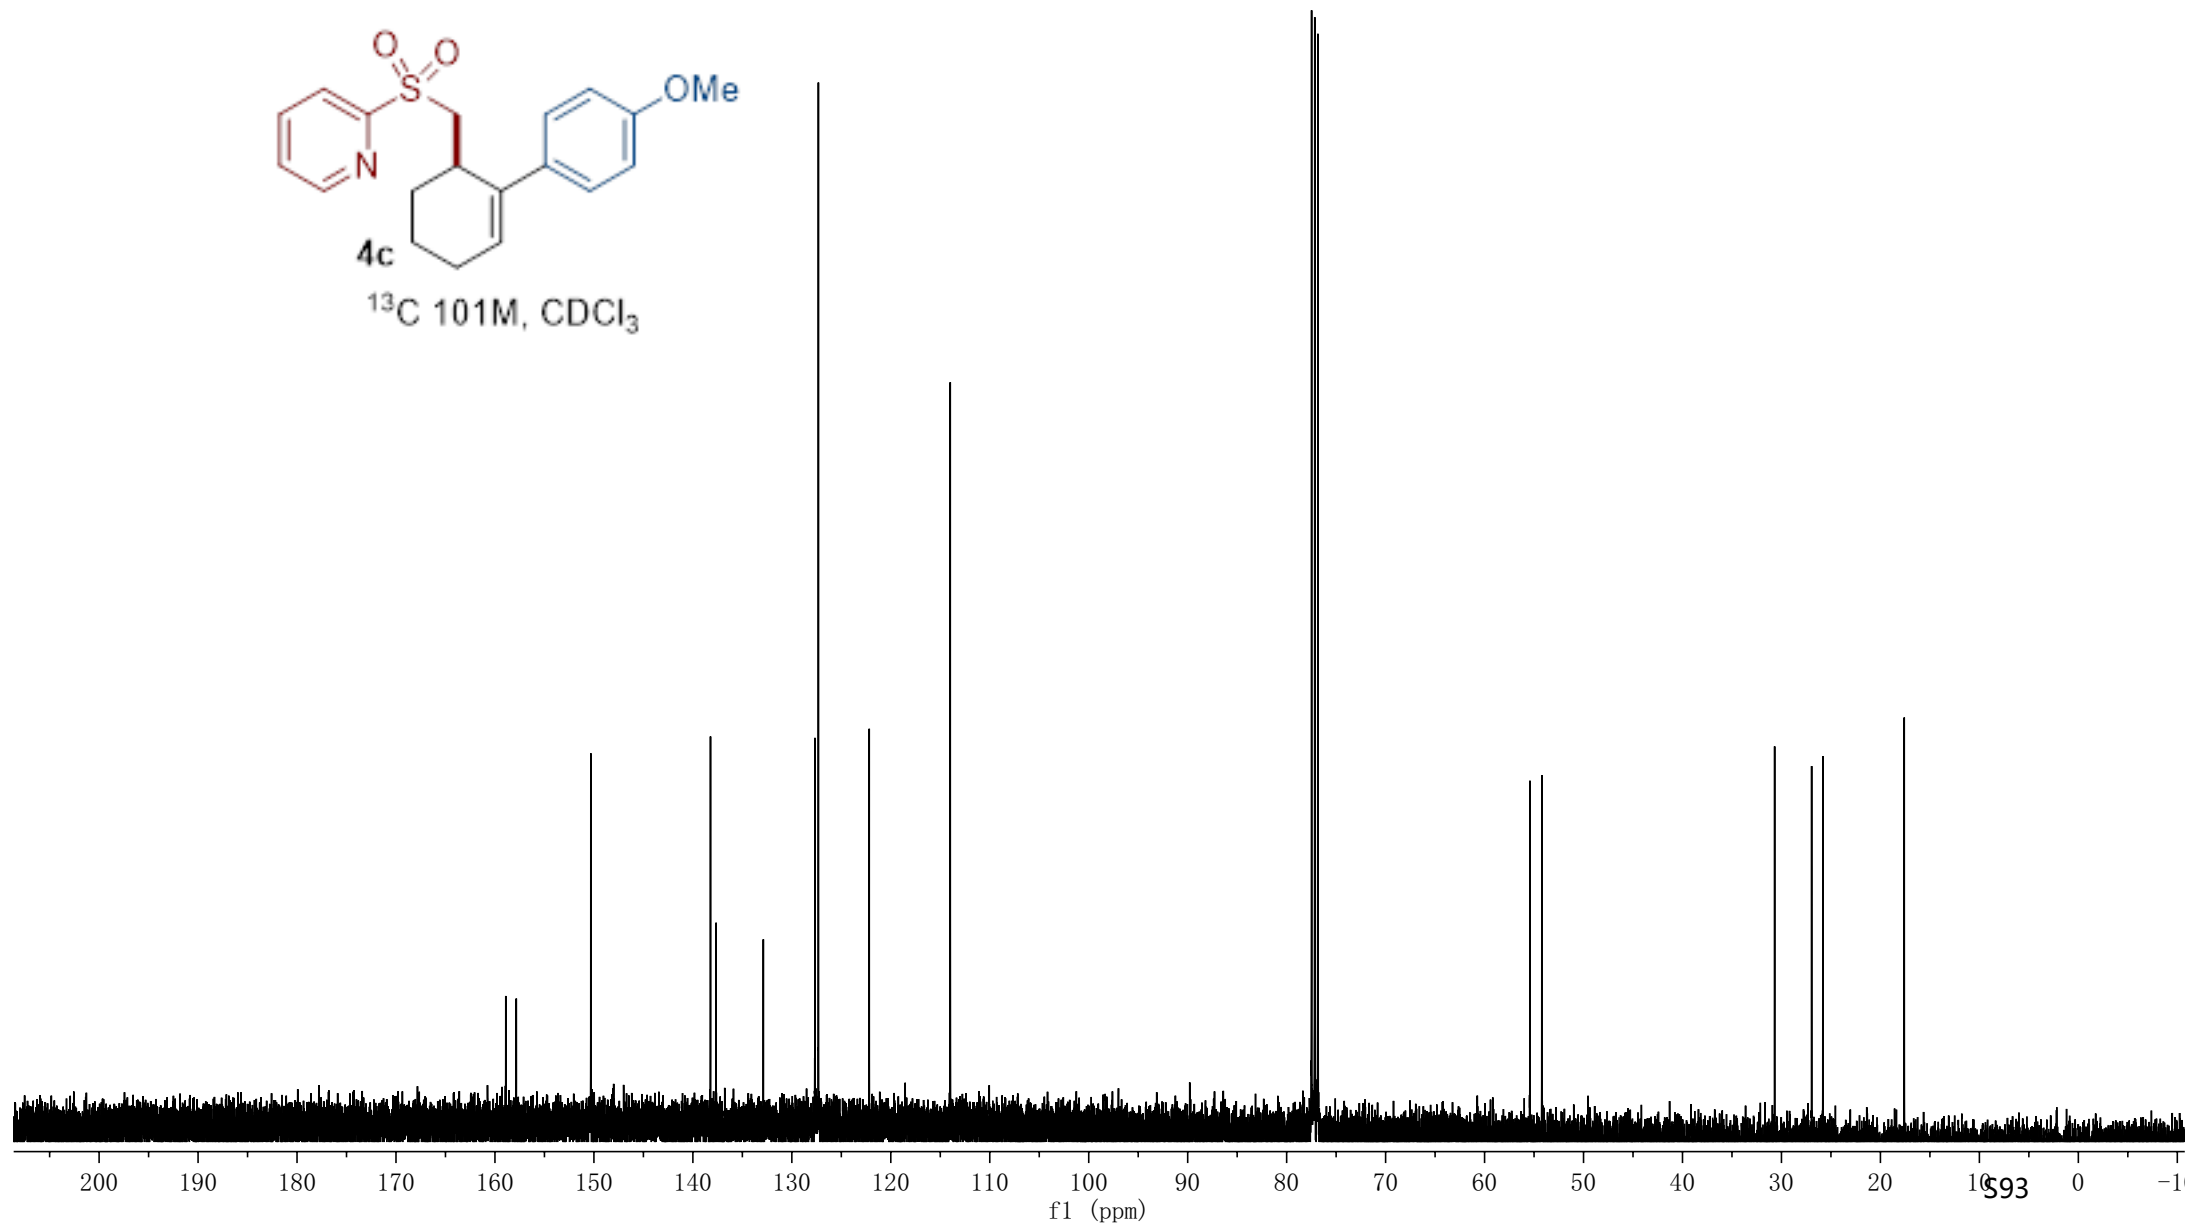

zwjiao-D794-H  
zwjiao-D794-H

8.65  
8.63  
8.05  
7.96  
7.95  
7.96  
7.56  
7.55  
7.53  
7.34  
7.32  
7.26  
6.19  
6.18  
6.17

3.48  
3.47  
3.40  
3.37  
3.36  
3.34  
3.19  
3.15  
2.23  
2.22  
2.22  
2.21  
2.19  
2.19  
2.18  
2.17  
2.17  
2.16  
2.15  
1.93  
1.89  
1.89  
1.73  
1.72  
1.71  
1.70  
1.69  
1.63

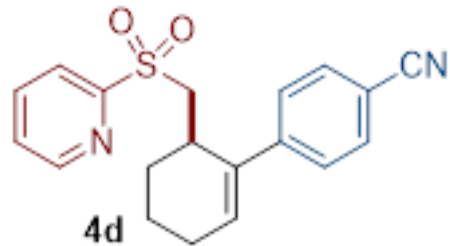

<sup>1</sup>H 400M, CDCl<sub>3</sub>

zwjiao-D794-H  
zwjiao-D794-H

8.07  
8.05  
7.98  
7.97  
7.96  
7.95  
7.94  
7.93  
7.56  
7.56  
7.55  
7.53  
7.34  
7.32  
7.26

zwjiao-D794-H  
zwjiao-D794-H  
3.48  
3.47  
3.40  
3.37  
3.36  
3.34  
3.19  
3.15

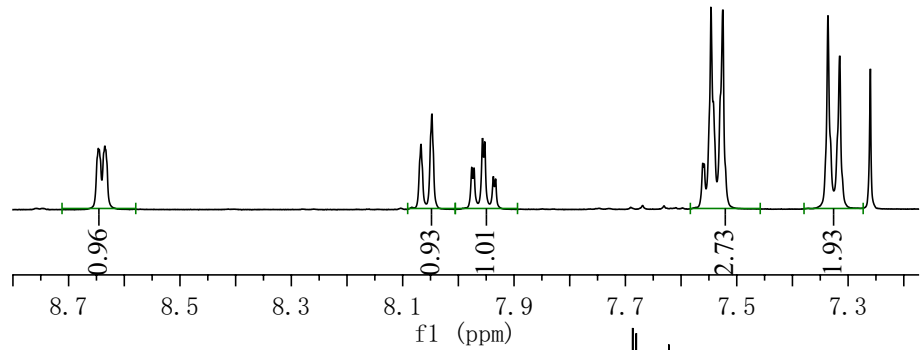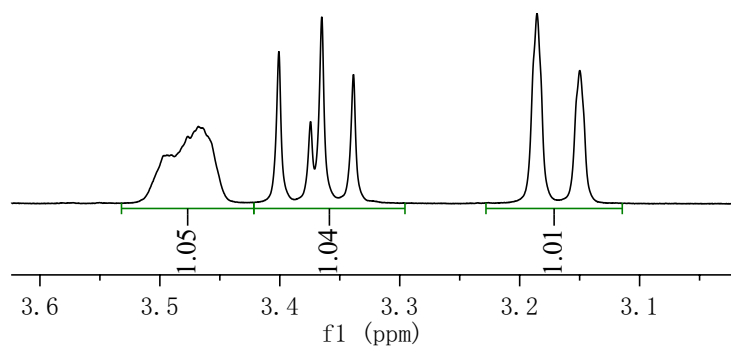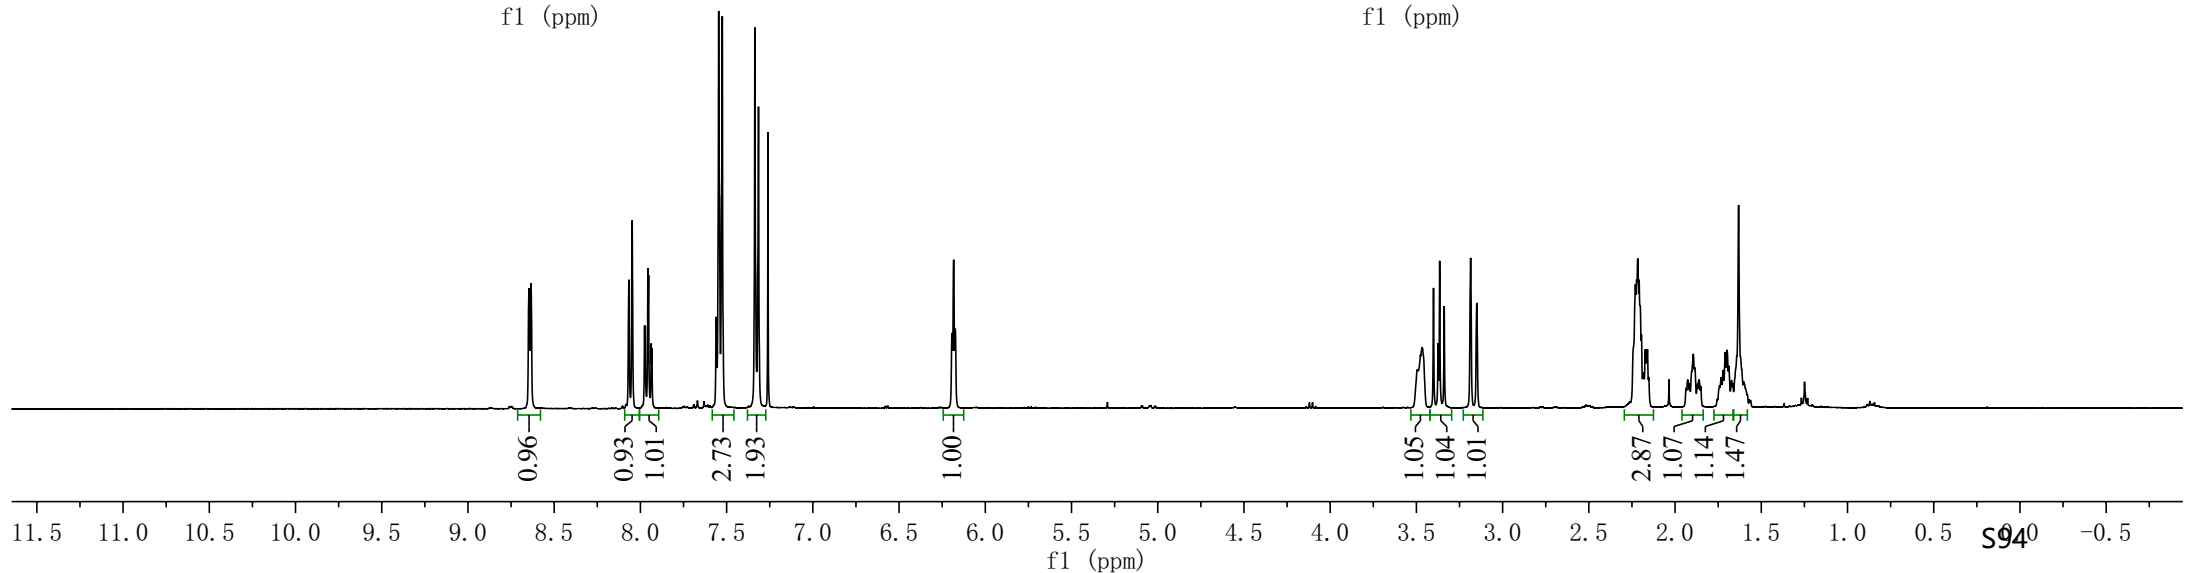

zwjiao-D794-C-1  
zwjiao-D794-C

— 157.68  
— 150.28  
— 144.93  
~ 138.38  
~ 137.12  
~ 132.46  
~ 132.27  
~ 127.54  
~ 126.82  
~ 122.07  
~ 118.95

— 110.79

~ 77.48  
~ 77.16  
~ 76.84

— 53.91

~ 30.10  
~ 26.98  
~ 25.94

— 17.40

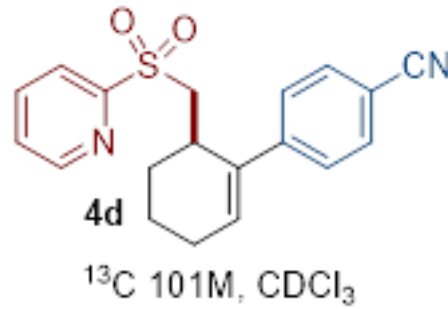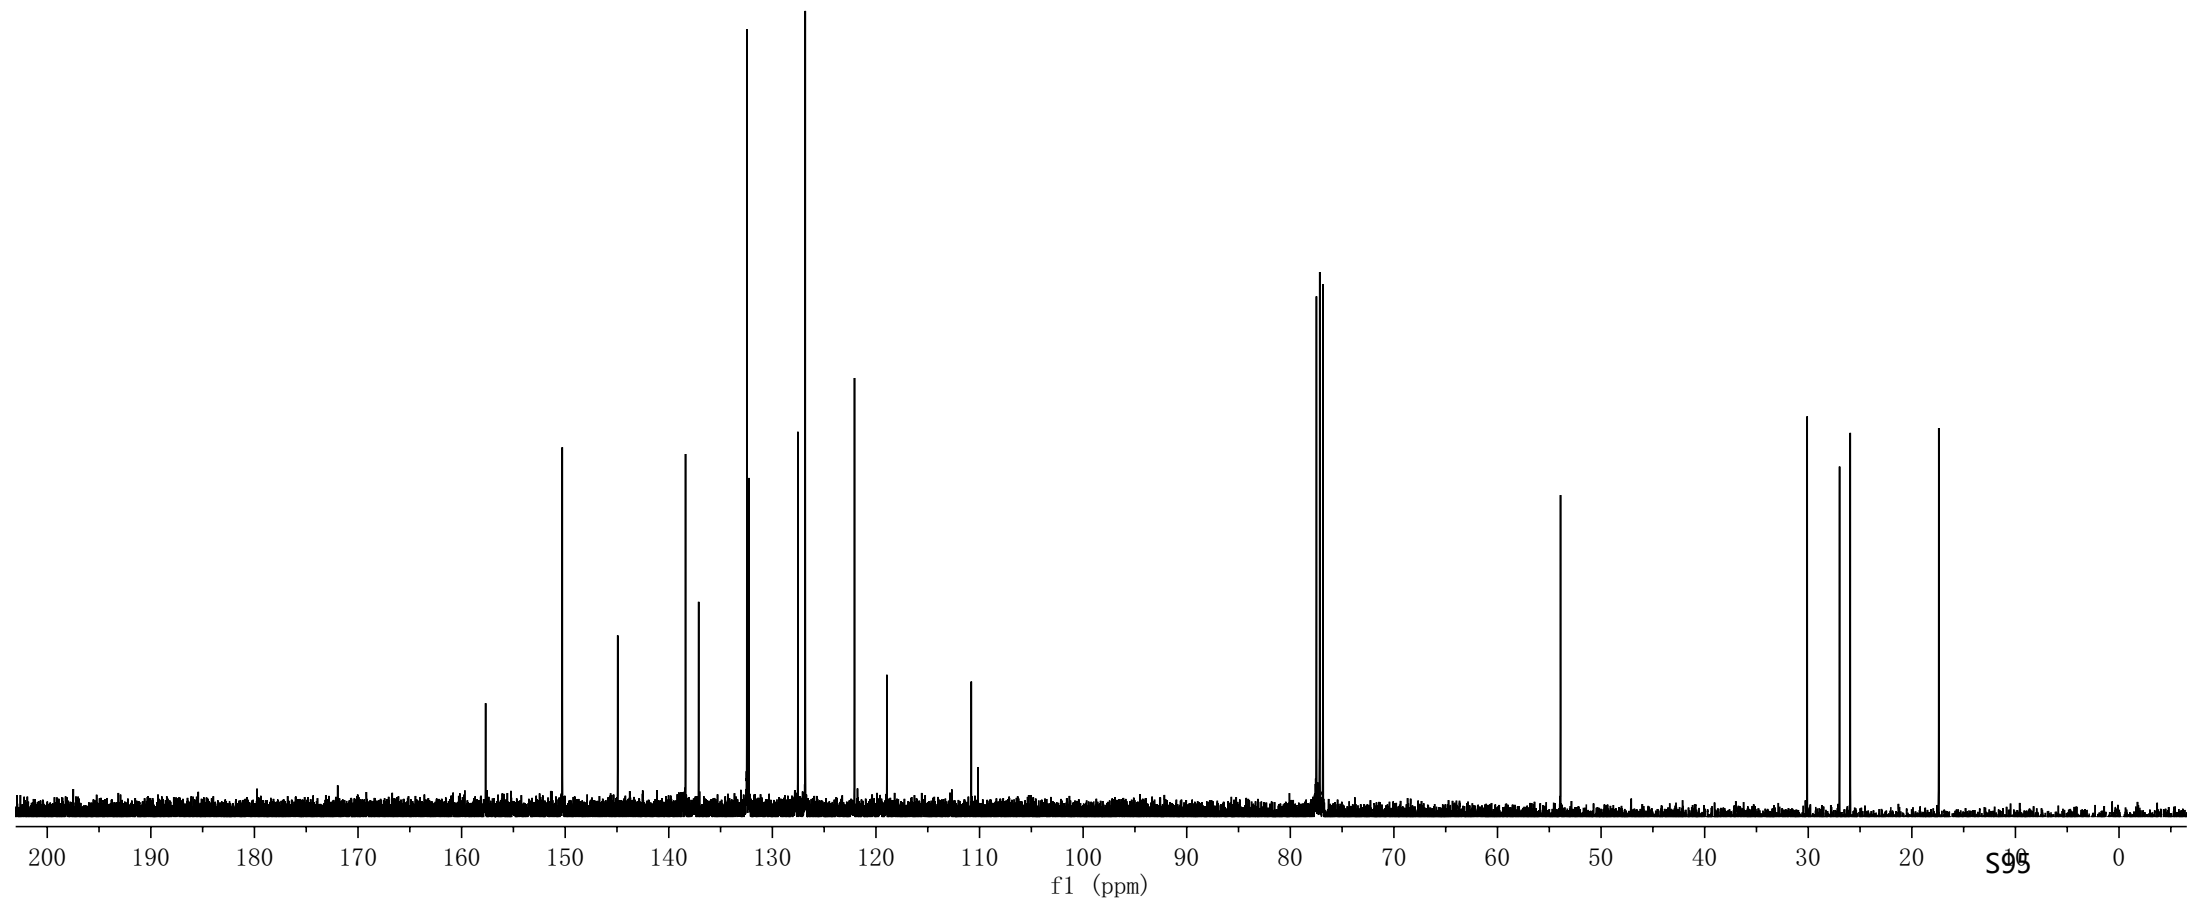

ZWJIAO-d798-h  
zwjiao-d798-h

8.60 8.60 8.60 8.59 8.59  
8.04 7.94 7.93  
7.53 7.52 7.52 7.48 7.46 7.28 7.26 7.26 6.11 6.10  
3.41 3.39 3.36 3.35 3.33 3.24 3.20  
2.21 2.21 2.20 2.18 2.18 2.17 1.95

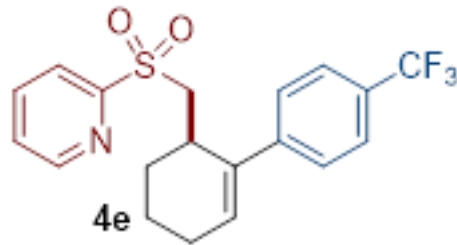

<sup>1</sup>H 400M, CDCl<sub>3</sub>

ZWJIAO-d798-h  
zwjiao-d798-h

8.06 8.04 7.96 7.95 7.94 7.93 7.92 7.91

7.54 7.53 7.52 7.52 7.52 7.51 7.50 7.48 7.46 7.26

ZWJIAO-d798-h  
zwjiao-d798-h

3.41 3.39 3.36 3.35 3.33

3.24 3.20

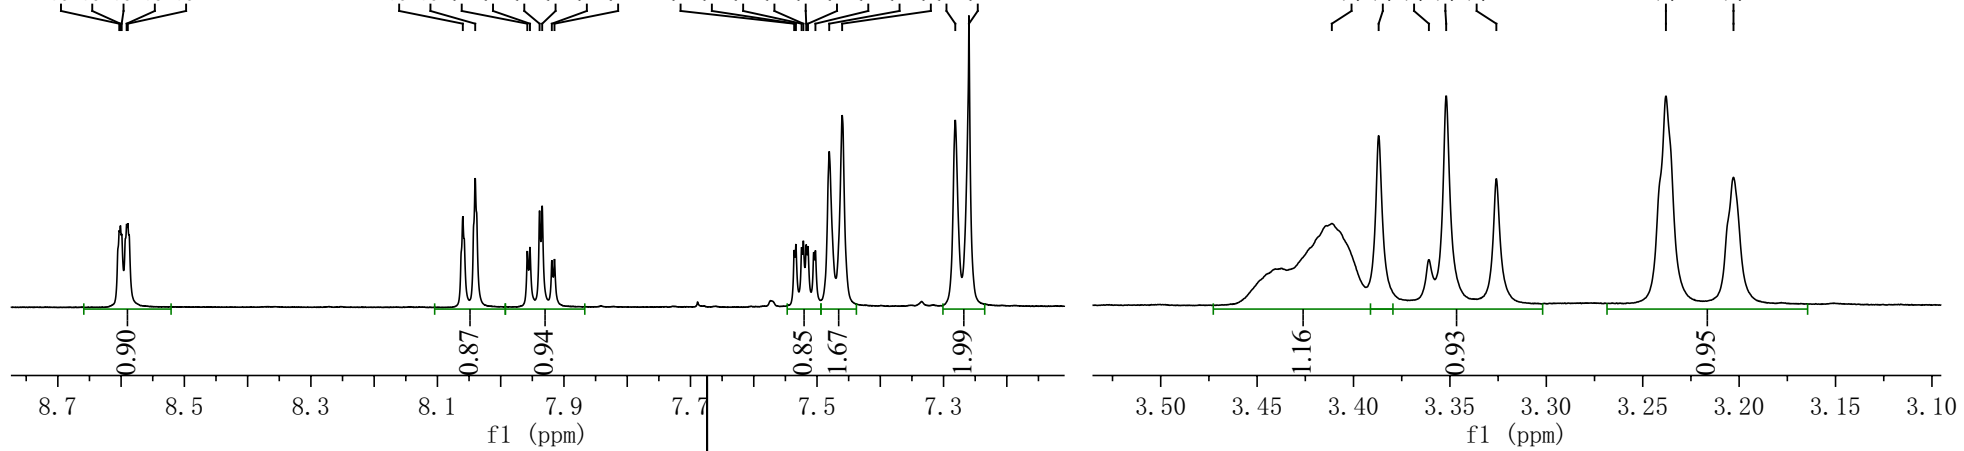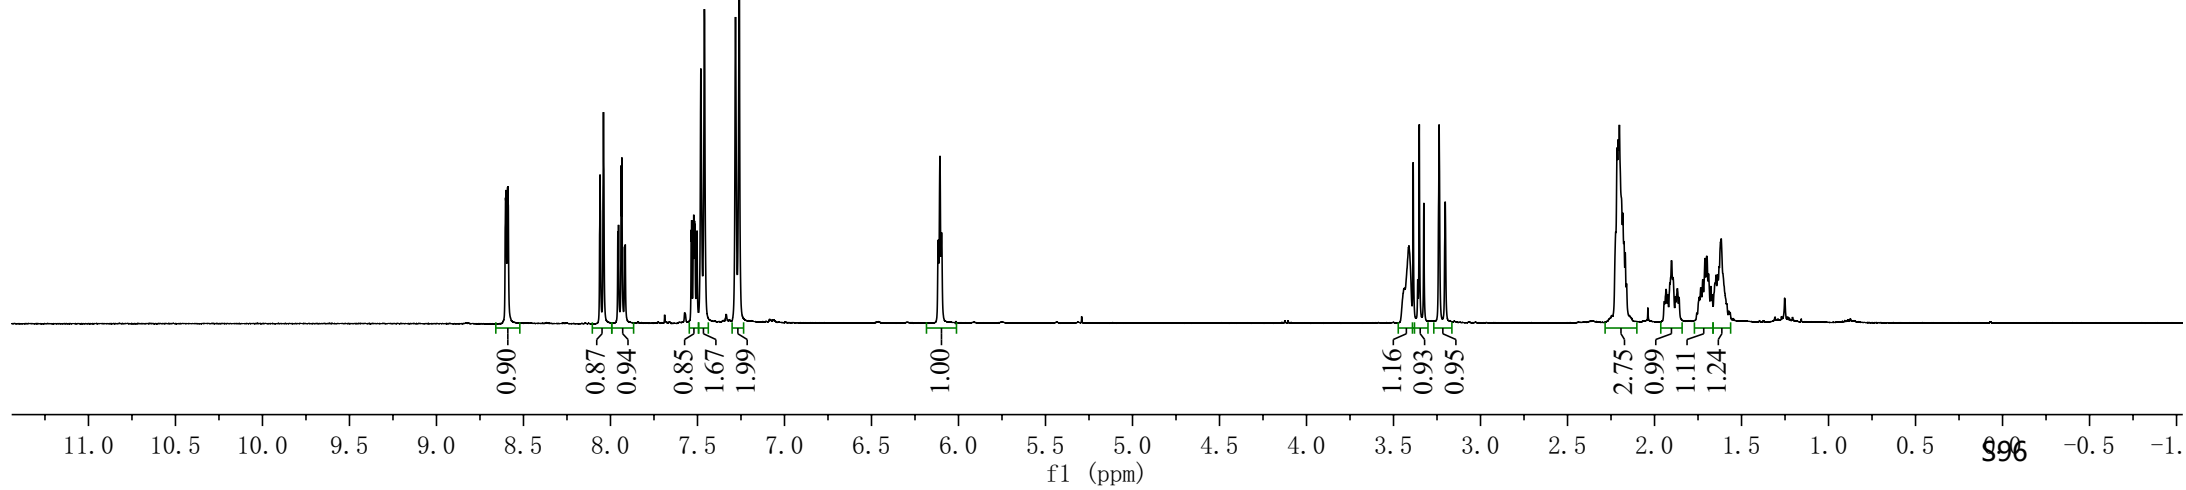



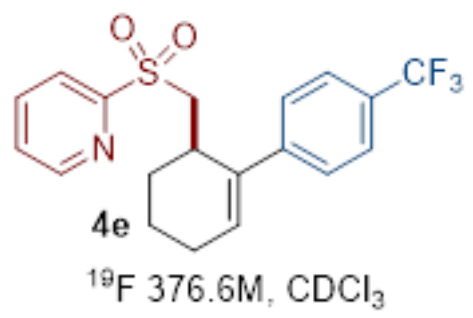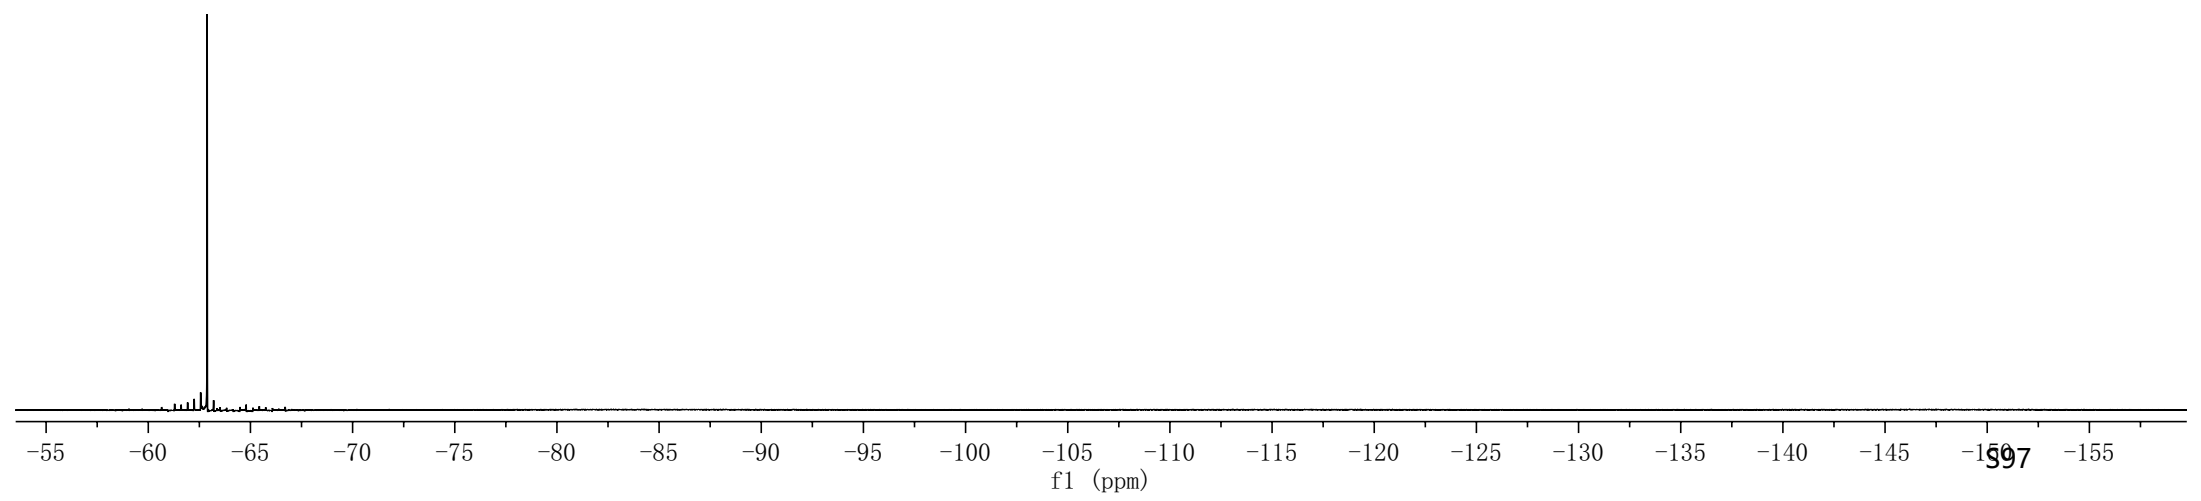

zwjiao-D798-C  
zwjiao-D798-C

— 157.56  
— 150.30  
~ 144.08  
~ 138.28  
~ 137.42  
~ 131.10  
~ 129.68  
~ 129.36  
~ 129.04  
~ 128.70  
~ 127.46  
~ 126.58  
~ 125.60  
~ 125.57  
~ 125.53  
~ 125.49  
~ 122.15

~ 77.48  
~ 77.16  
~ 76.84

— 53.96

~ 30.61  
~ 27.02  
~ 25.84

— 17.46

zwjiao-D798-C  
zwjiao-D798-C

— 131.10  
— 129.68  
— 129.36  
— 129.04  
— 128.70  
— 127.46  
— 126.58  
~ 125.60  
~ 125.57  
~ 125.53  
~ 125.49

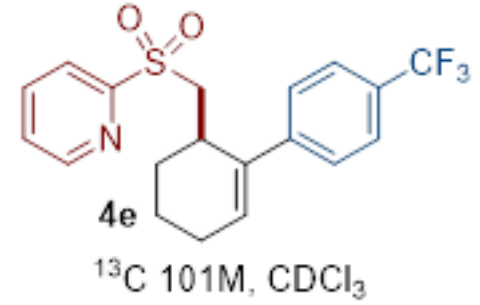

133 132 131 130 129 128 127 126 125  
f1 (ppm)

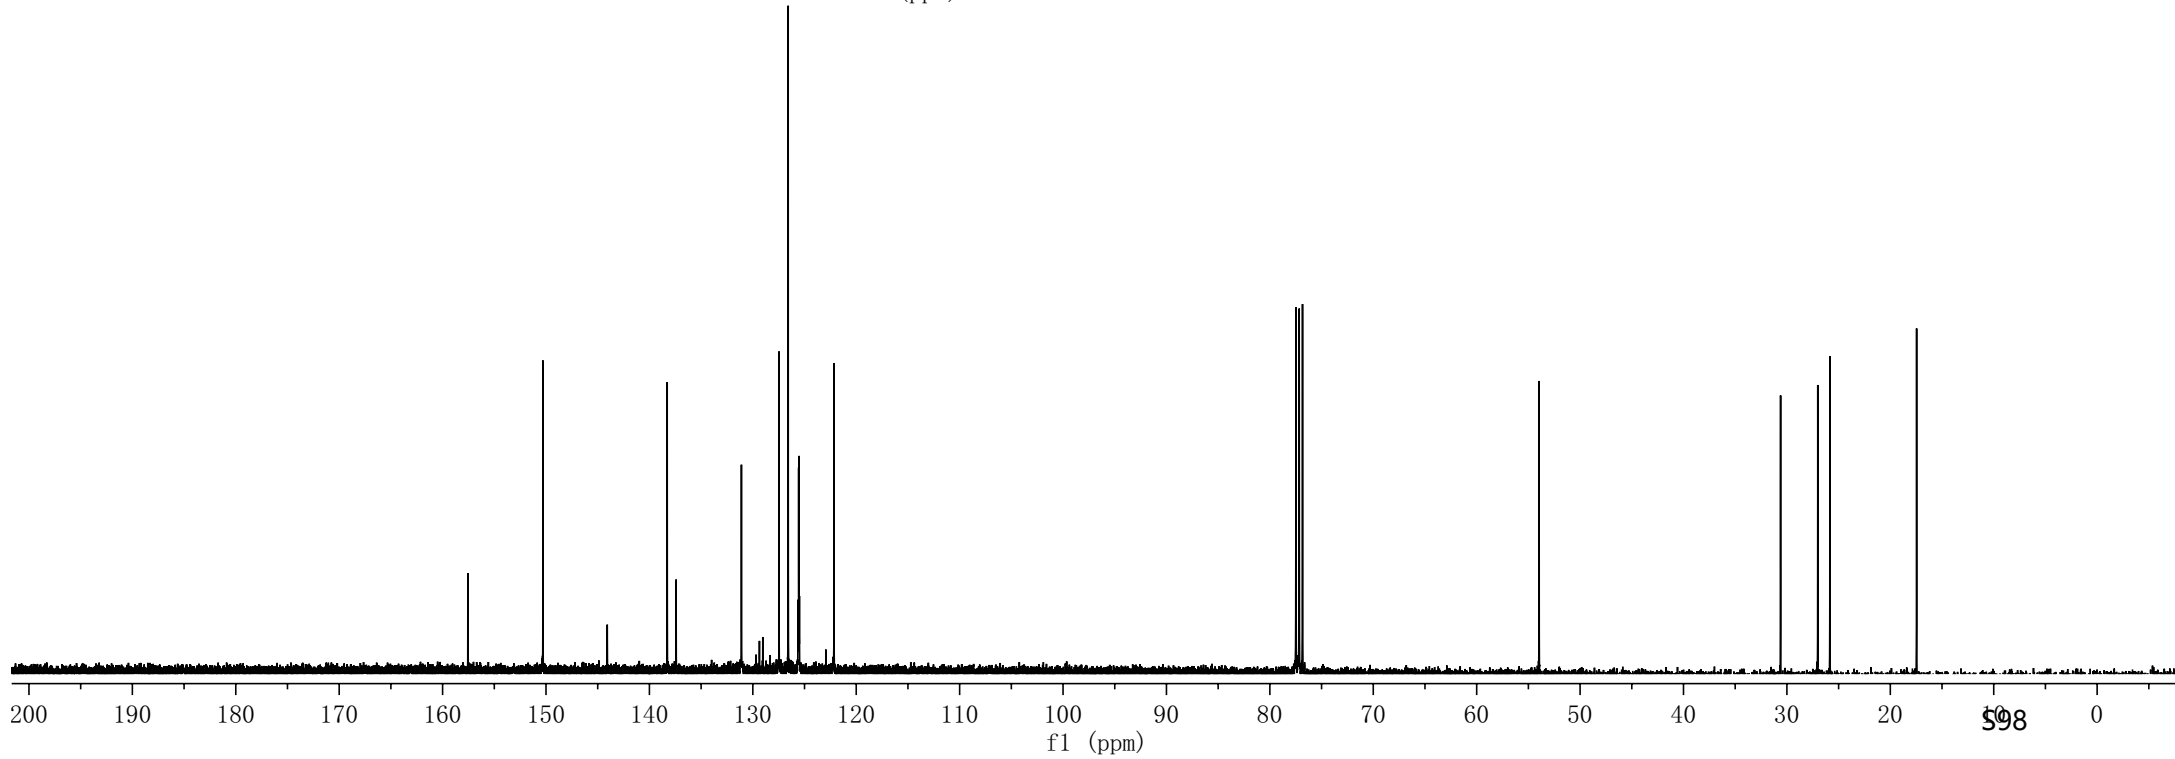

8.63  
8.62  
8.61  
8.60  
8.59  
8.58  
8.57  
8.56  
8.55  
8.54  
8.53  
8.52  
8.51  
8.50  
8.49  
8.48  
8.47  
8.46  
8.45  
8.44  
8.43  
8.42  
8.41  
8.40  
8.39  
8.38  
8.37  
8.36  
8.35  
8.34  
8.33  
8.32  
8.31  
8.30  
8.29  
8.28  
8.27  
8.26  
8.25  
8.24  
8.23  
8.22  
8.21  
8.20  
8.19  
8.18  
8.17  
8.16  
8.15  
8.14  
8.13  
8.12  
8.11  
8.10  
8.09  
8.08  
8.07  
8.06  
8.05  
8.04  
8.03  
8.02  
8.01  
8.00  
7.99  
7.98  
7.97  
7.96  
7.95  
7.94  
7.93  
7.92  
7.91  
7.90  
7.89  
7.88  
7.87  
7.86  
7.85  
7.84  
7.83  
7.82  
7.81  
7.80  
7.79  
7.78  
7.77  
7.76  
7.75  
7.74  
7.73  
7.72  
7.71  
7.70  
7.69  
7.68  
7.67  
7.66  
7.65  
7.64  
7.63  
7.62  
7.61  
7.60  
7.59  
7.58  
7.57  
7.56  
7.55  
7.54  
7.53  
7.52  
7.51  
7.50  
7.49  
7.48  
7.47  
7.46  
7.45  
7.44  
7.43  
7.42  
7.41  
7.40  
7.39  
7.38  
7.37  
7.36  
7.35  
7.34  
7.33  
7.32  
7.31  
7.30  
7.29  
7.28  
7.27  
7.26  
7.25  
7.24  
7.23  
7.22  
7.21  
7.20  
7.19  
7.18  
7.17  
7.16  
7.15  
7.14  
7.13  
7.12  
7.11  
7.10  
7.09  
7.08  
7.07  
7.06  
7.05  
7.04  
7.03  
7.02  
7.01  
7.00  
6.99  
6.98  
6.97  
6.96  
6.95  
6.94  
6.93  
6.92  
6.91  
6.90  
6.89  
6.88  
6.87  
6.86  
6.85  
6.84  
6.83  
6.82  
6.81  
6.80  
6.79  
6.78  
6.77  
6.76  
6.75  
6.74  
6.73  
6.72  
6.71  
6.70  
6.69  
6.68  
6.67  
6.66  
6.65  
6.64  
6.63  
6.62  
6.61  
6.60  
6.59  
6.58  
6.57  
6.56  
6.55  
6.54  
6.53  
6.52  
6.51  
6.50  
6.49  
6.48  
6.47  
6.46  
6.45  
6.44  
6.43  
6.42  
6.41  
6.40  
6.39  
6.38  
6.37  
6.36  
6.35  
6.34  
6.33  
6.32  
6.31  
6.30  
6.29  
6.28  
6.27  
6.26  
6.25  
6.24  
6.23  
6.22  
6.21  
6.20  
6.19  
6.18  
6.17  
6.16  
6.15  
6.14  
6.13  
6.12  
6.11  
6.10  
6.09  
6.08  
6.07  
6.06  
6.05  
6.04  
6.03  
6.02  
6.01  
6.00  
5.99  
5.98  
5.97  
5.96  
5.95  
5.94  
5.93  
5.92  
5.91  
5.90  
5.89  
5.88  
5.87  
5.86  
5.85  
5.84  
5.83  
5.82  
5.81  
5.80  
5.79  
5.78  
5.77  
5.76  
5.75  
5.74  
5.73  
5.72  
5.71  
5.70  
5.69  
5.68  
5.67  
5.66  
5.65  
5.64  
5.63  
5.62  
5.61  
5.60  
5.59  
5.58  
5.57  
5.56  
5.55  
5.54  
5.53  
5.52  
5.51  
5.50  
5.49  
5.48  
5.47  
5.46  
5.45  
5.44  
5.43  
5.42  
5.41  
5.40  
5.39  
5.38  
5.37  
5.36  
5.35  
5.34  
5.33  
5.32  
5.31  
5.30  
5.29  
5.28  
5.27  
5.26  
5.25  
5.24  
5.23  
5.22  
5.21  
5.20  
5.19  
5.18  
5.17  
5.16  
5.15  
5.14  
5.13  
5.12  
5.11  
5.10  
5.09  
5.08  
5.07  
5.06  
5.05  
5.04  
5.03  
5.02  
5.01  
5.00  
4.99  
4.98  
4.97  
4.96  
4.95  
4.94  
4.93  
4.92  
4.91  
4.90  
4.89  
4.88  
4.87  
4.86  
4.85  
4.84  
4.83  
4.82  
4.81  
4.80  
4.79  
4.78  
4.77  
4.76  
4.75  
4.74  
4.73  
4.72  
4.71  
4.70  
4.69  
4.68  
4.67  
4.66  
4.65  
4.64  
4.63  
4.62  
4.61  
4.60  
4.59  
4.58  
4.57  
4.56  
4.55  
4.54  
4.53  
4.52  
4.51  
4.50  
4.49  
4.48  
4.47  
4.46  
4.45  
4.44  
4.43  
4.42  
4.41  
4.40  
4.39  
4.38  
4.37  
4.36  
4.35  
4.34  
4.33  
4.32  
4.31  
4.30  
4.29  
4.28  
4.27  
4.26  
4.25  
4.24  
4.23  
4.22  
4.21  
4.20  
4.19  
4.18  
4.17  
4.16  
4.15  
4.14  
4.13  
4.12  
4.11  
4.10  
4.09  
4.08  
4.07  
4.06  
4.05  
4.04  
4.03  
4.02  
4.01  
4.00  
3.99  
3.98  
3.97  
3.96  
3.95  
3.94  
3.93  
3.92  
3.91  
3.90  
3.89  
3.88  
3.87  
3.86  
3.85  
3.84  
3.83  
3.82  
3.81  
3.80  
3.79  
3.78  
3.77  
3.76  
3.75  
3.74  
3.73  
3.72  
3.71  
3.70  
3.69  
3.68  
3.67  
3.66  
3.65  
3.64  
3.63  
3.62  
3.61  
3.60  
3.59  
3.58  
3.57  
3.56  
3.55  
3.54  
3.53  
3.52  
3.51  
3.50  
3.49  
3.48  
3.47  
3.46  
3.45  
3.44  
3.43  
3.42  
3.41  
3.40  
3.39  
3.38  
3.37  
3.36  
3.35  
3.34  
3.33  
3.32  
3.31  
3.30  
3.29  
3.28  
3.27  
3.26  
3.25  
3.24  
3.23  
3.22  
3.21  
3.20  
3.19  
3.18  
3.17  
3.16  
3.15  
3.14  
3.13  
3.12  
3.11  
3.10  
3.09  
3.08  
3.07  
3.06  
3.05  
3.04  
3.03  
3.02  
3.01  
3.00  
2.99  
2.98  
2.97  
2.96  
2.95  
2.94  
2.93  
2.92  
2.91  
2.90  
2.89  
2.88  
2.87  
2.86  
2.85  
2.84  
2.83  
2.82  
2.81  
2.80  
2.79  
2.78  
2.77  
2.76  
2.75  
2.74  
2.73  
2.72  
2.71  
2.70  
2.69  
2.68  
2.67  
2.66  
2.65  
2.64  
2.63  
2.62  
2.61  
2.60  
2.59  
2.58  
2.57  
2.56  
2.55  
2.54  
2.53  
2.52  
2.51  
2.50  
2.49  
2.48  
2.47  
2.46  
2.45  
2.44  
2.43  
2.42  
2.41  
2.40  
2.39  
2.38  
2.37  
2.36  
2.35  
2.34  
2.33  
2.32  
2.31  
2.30  
2.29  
2.28  
2.27  
2.26  
2.25  
2.24  
2.23  
2.22  
2.21  
2.20  
2.19  
2.18  
2.17  
2.16  
2.15  
2.14  
2.13  
2.12  
2.11  
2.10  
2.09  
2.08  
2.07  
2.06  
2.05  
2.04  
2.03  
2.02  
2.01  
2.00  
1.99  
1.98  
1.97  
1.96  
1.95  
1.94  
1.93  
1.92  
1.91  
1.90  
1.89  
1.88  
1.87  
1.86  
1.85  
1.84  
1.83  
1.82  
1.81  
1.80  
1.79  
1.78  
1.77  
1.76  
1.75  
1.74  
1.73  
1.72  
1.71  
1.70  
1.69  
1.68  
1.67  
1.66  
1.65  
1.64  
1.63  
1.62  
1.61  
1.60  
1.59  
1.58

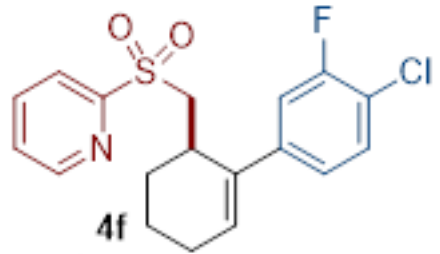

4f  
<sup>1</sup>H 400M, CDCl<sub>3</sub>

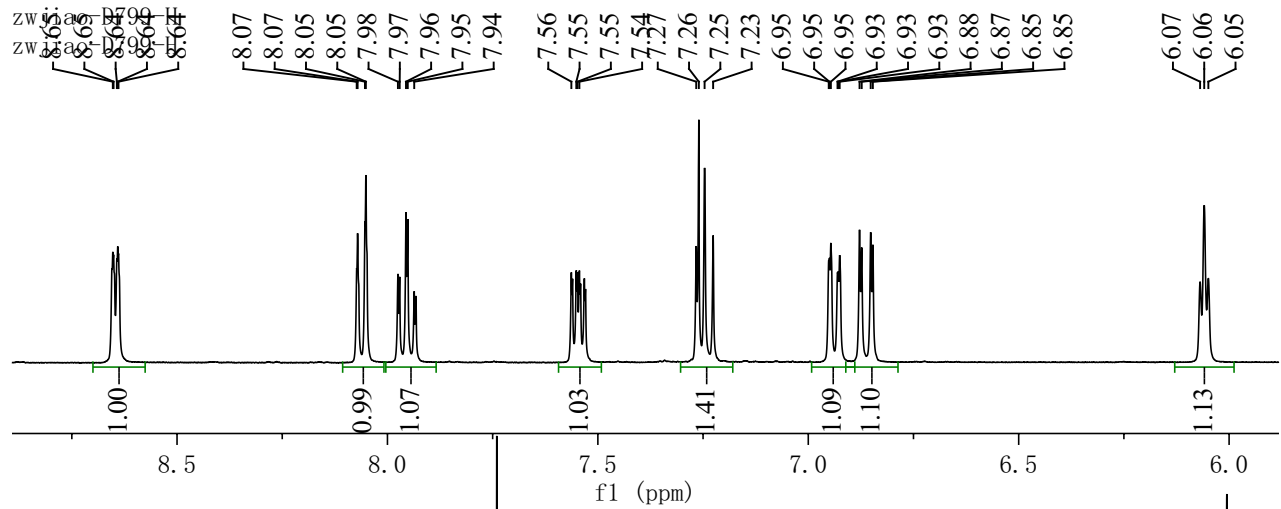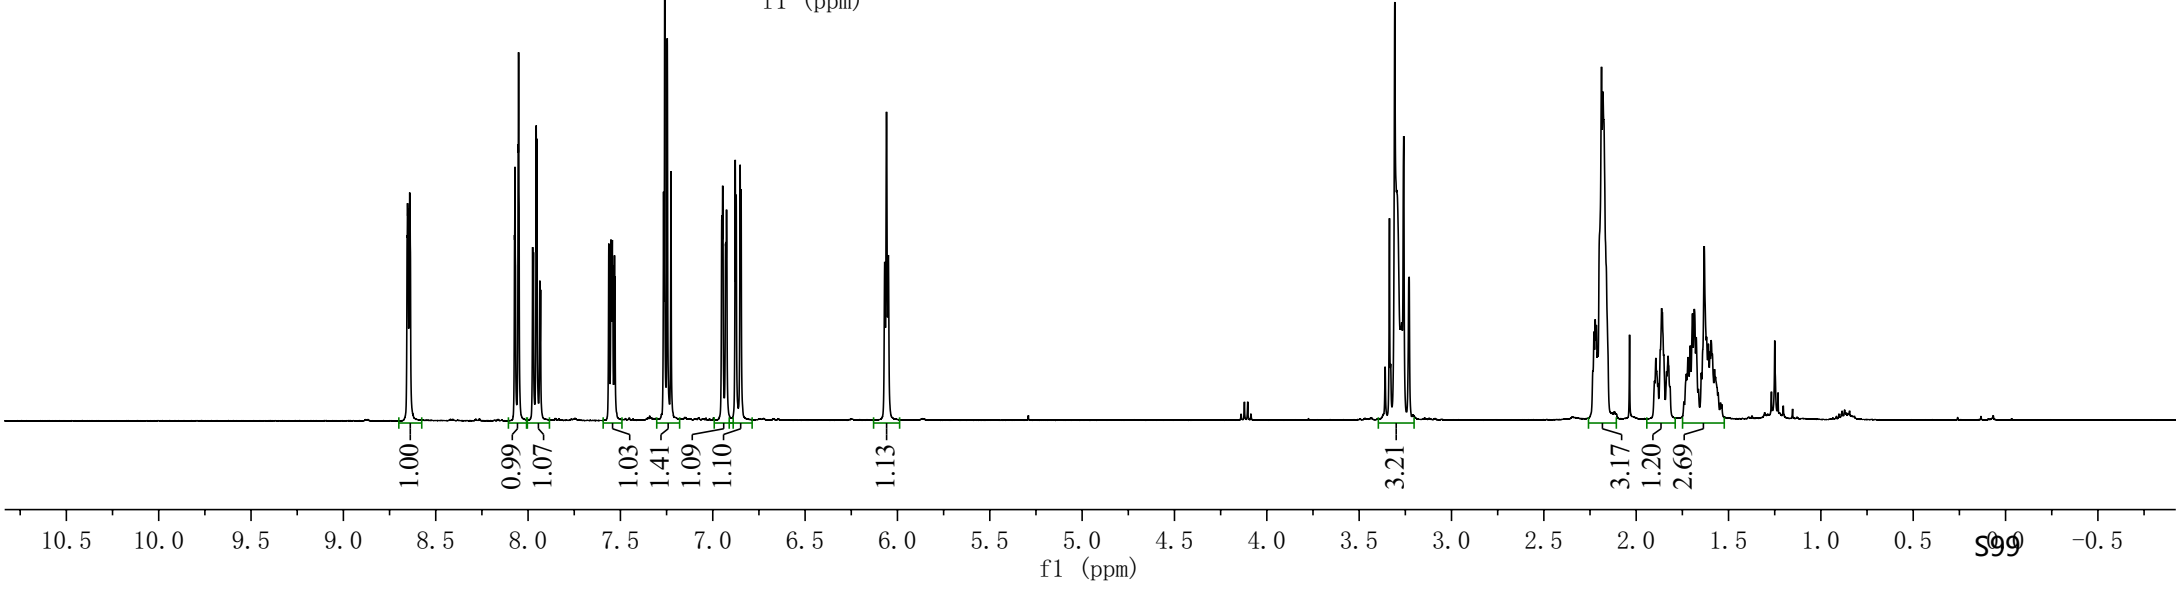

zwjiao-D799-F  
zwjiao-D799-F

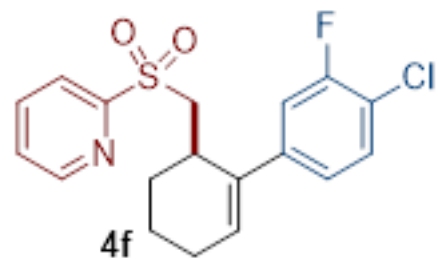

$^{19}\text{F}$  376.6M,  $\text{CDCl}_3$

—115.58

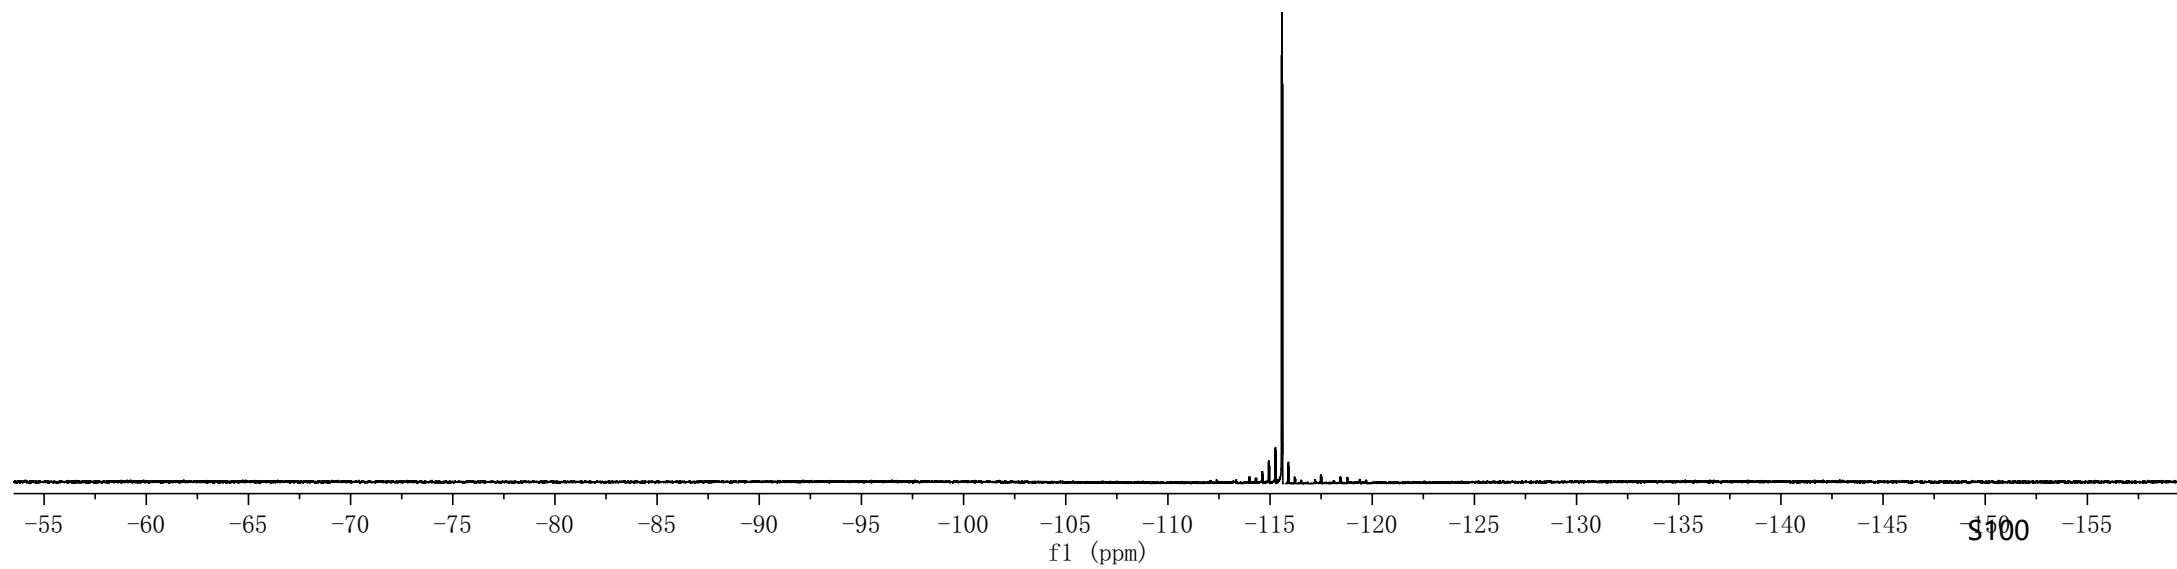

zwjiao-D799-C  
zwjiao-D799-C

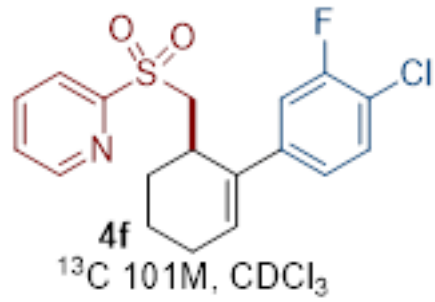

159.25  
157.43  
156.78  
150.35  
141.23  
141.17  
138.30  
136.61  
136.59  
130.65  
130.61  
127.54  
122.75  
122.71  
122.20  
119.66  
119.49  
114.43  
114.21

77.48  
77.16  
76.84

53.97

30.59  
26.84  
25.77

17.33

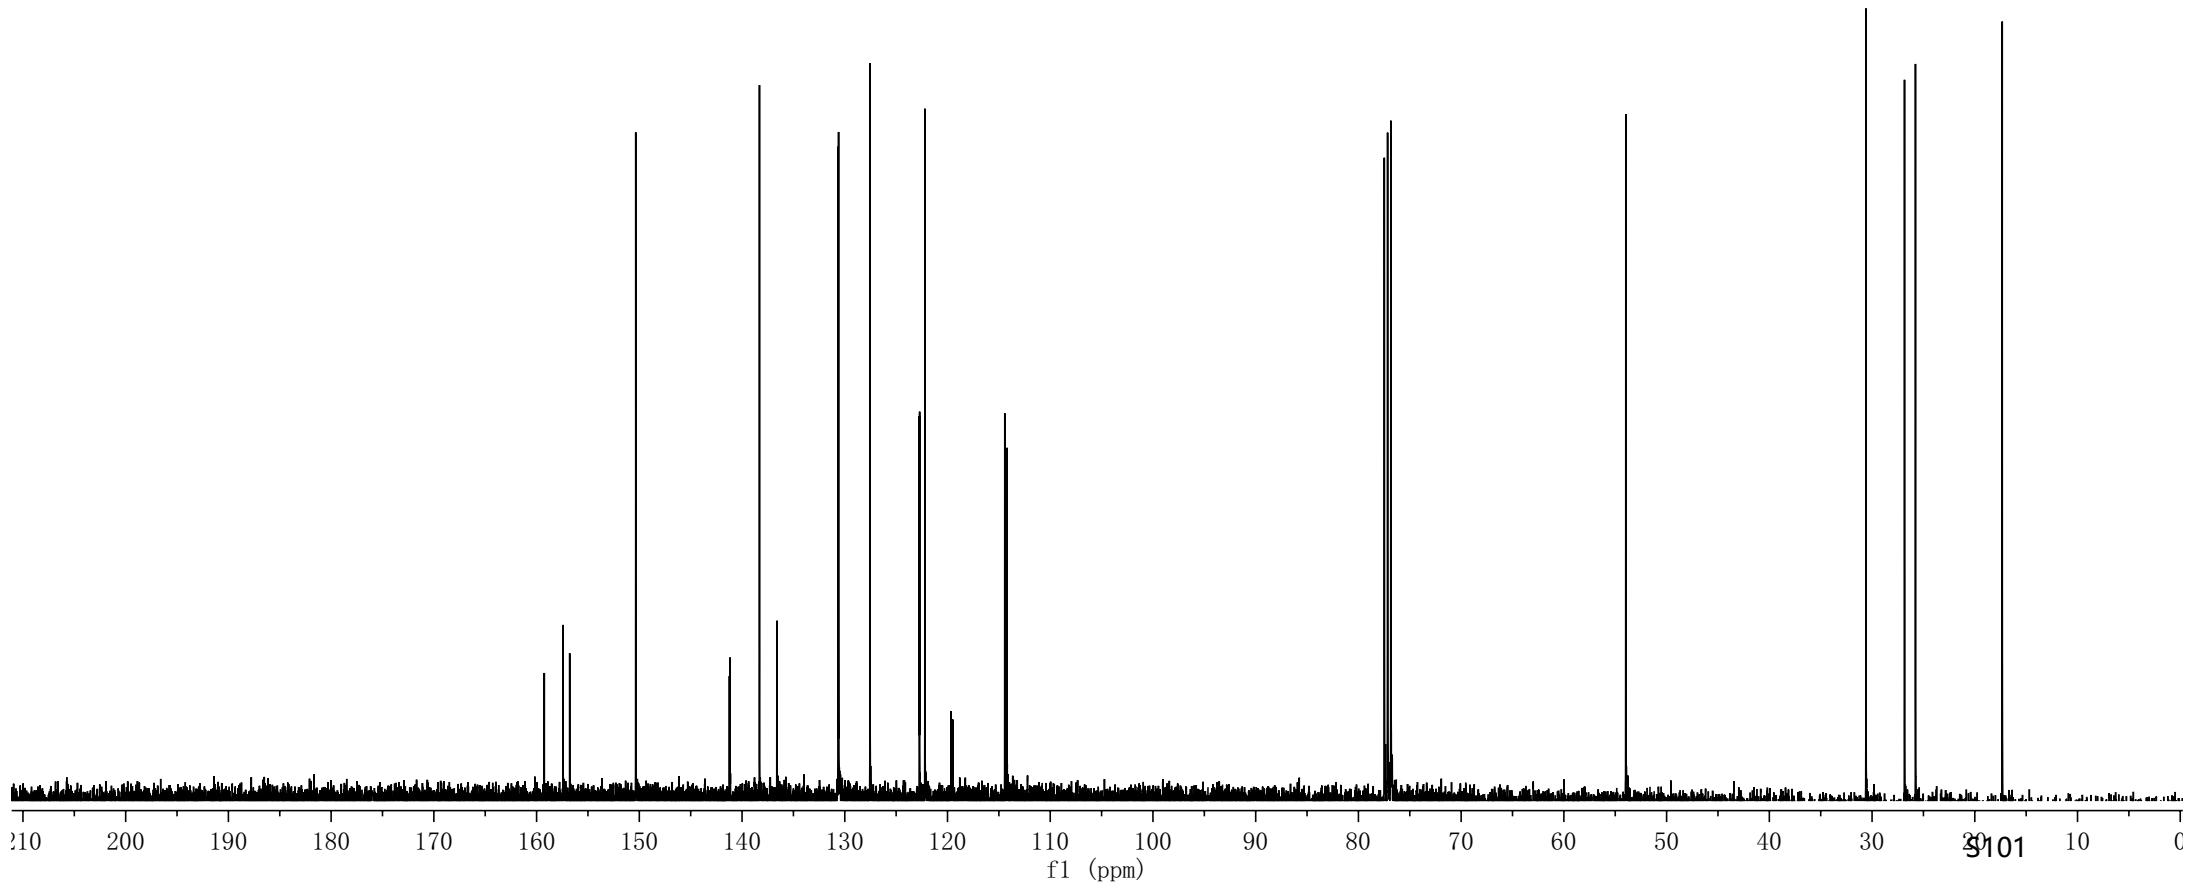

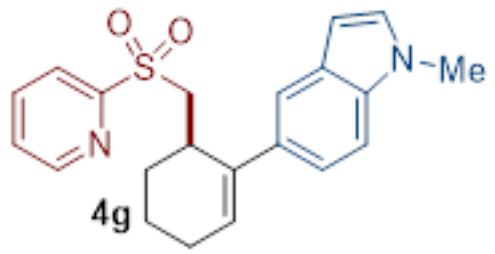

<sup>1</sup>H 400M, CDCl<sub>3</sub>

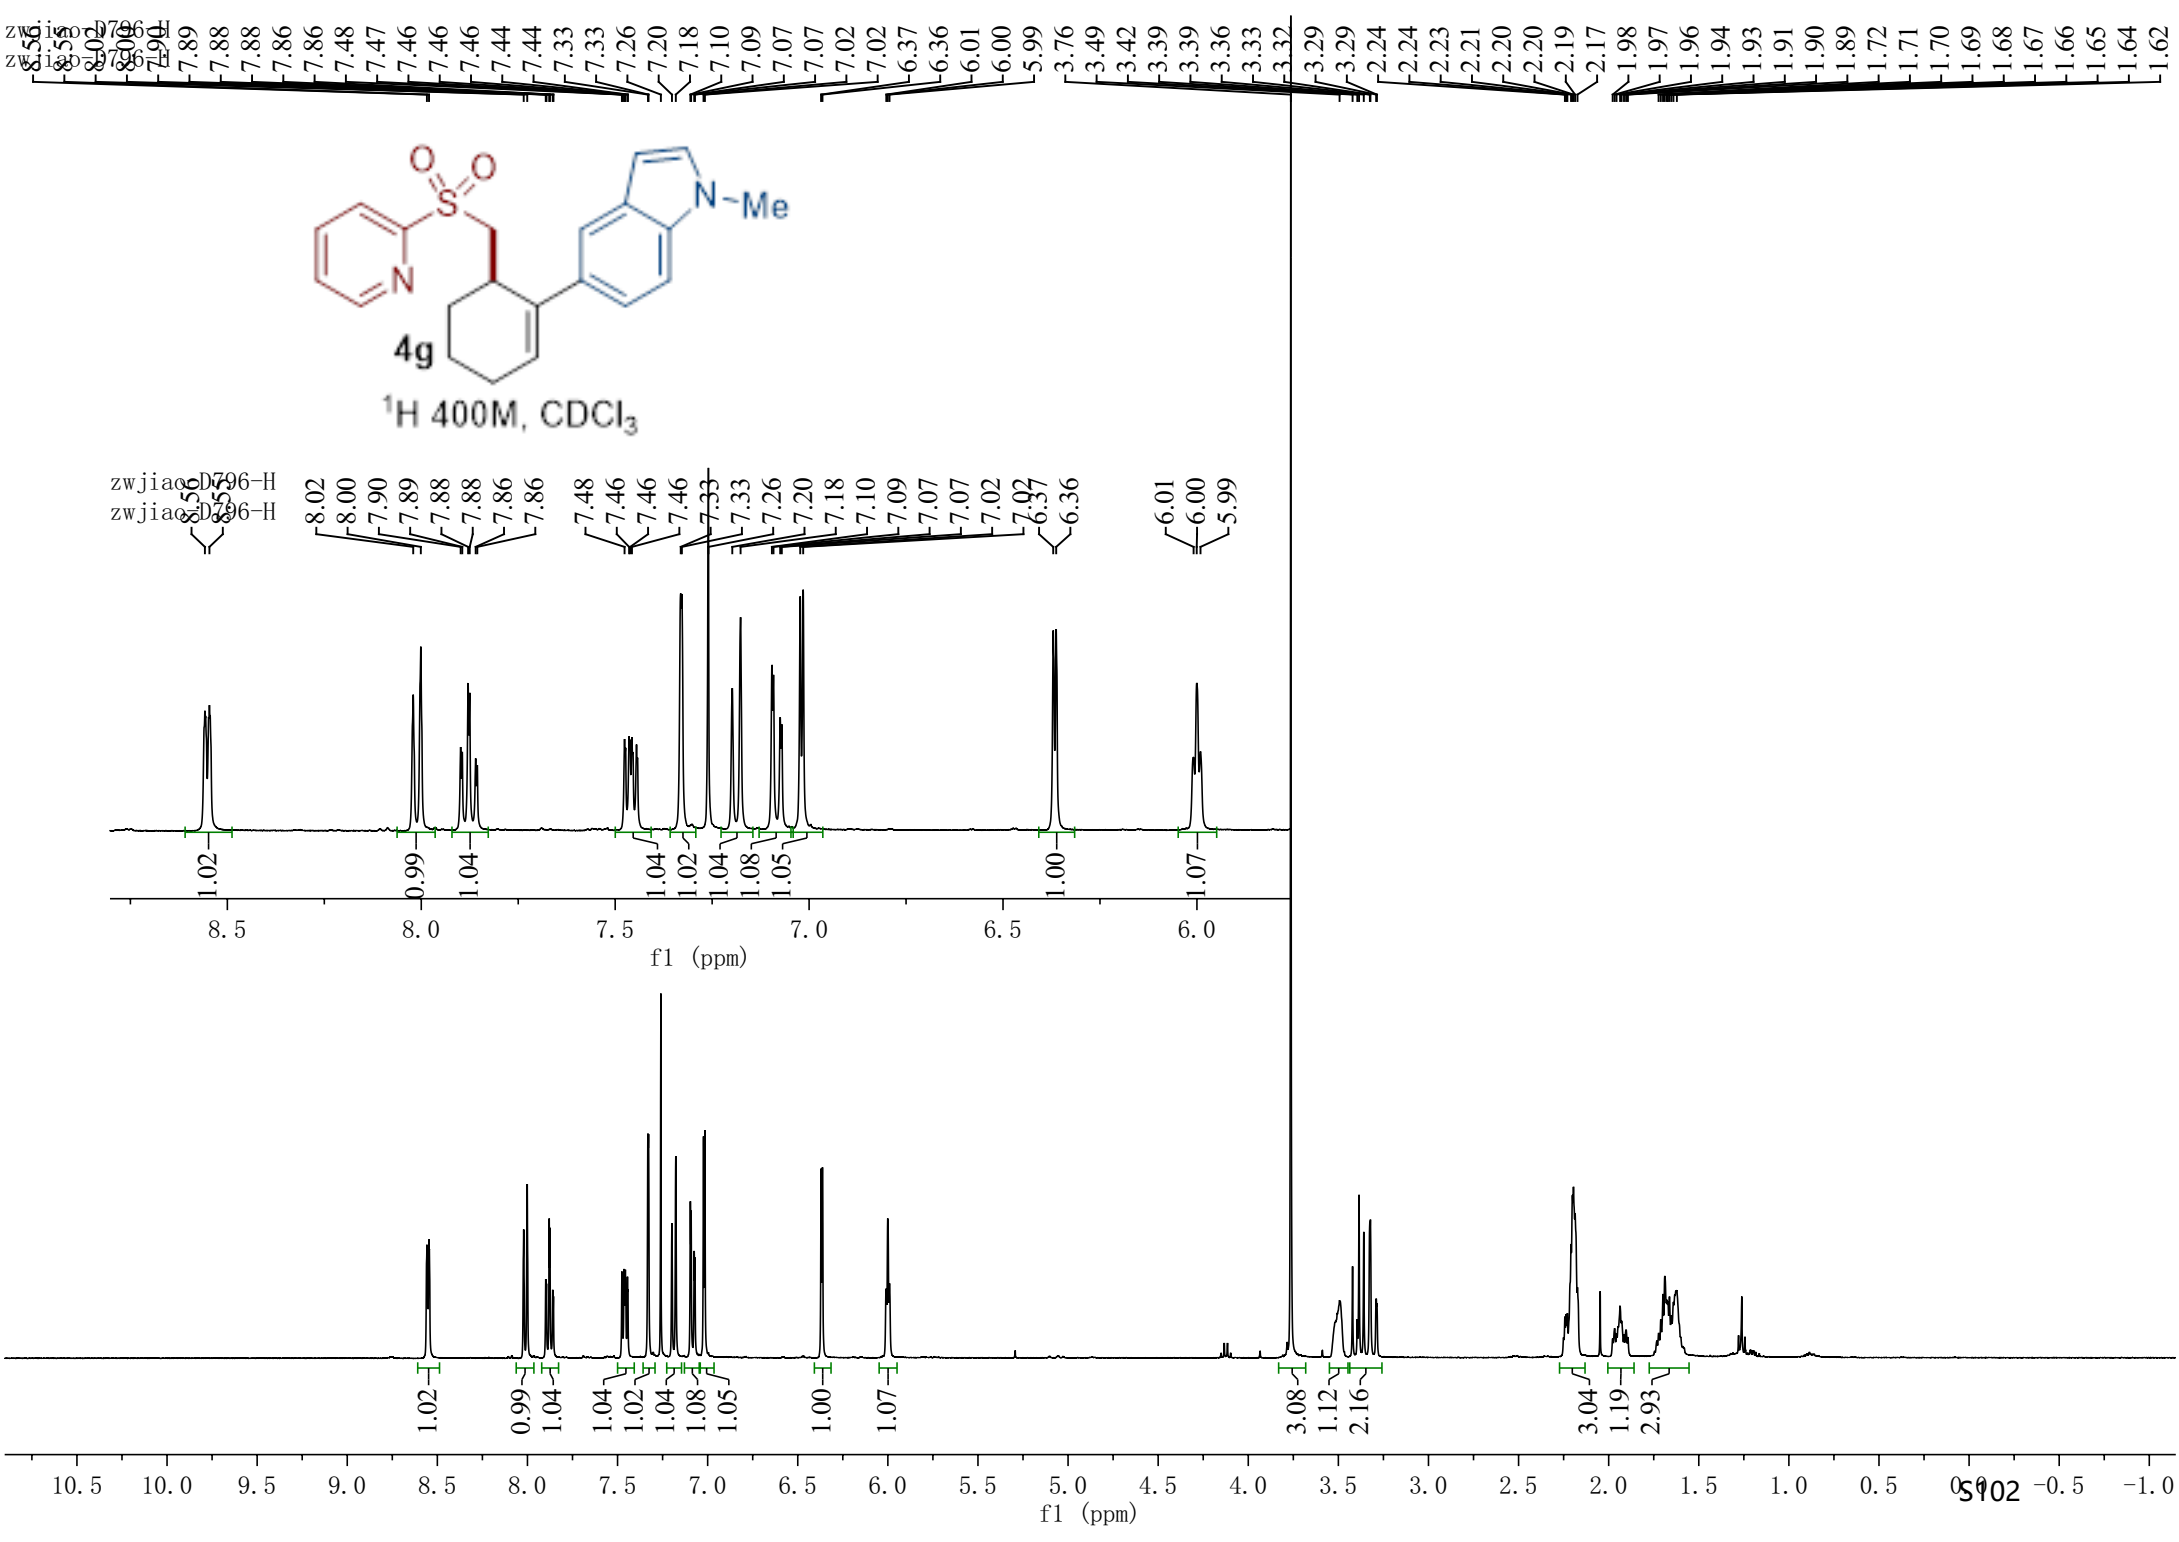

zwjiao-D796-C  
zwjiao-D796-C

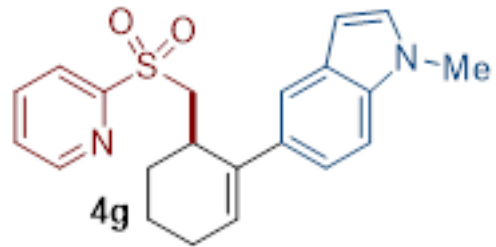

<sup>13</sup>C 101M, CDCl<sub>3</sub>

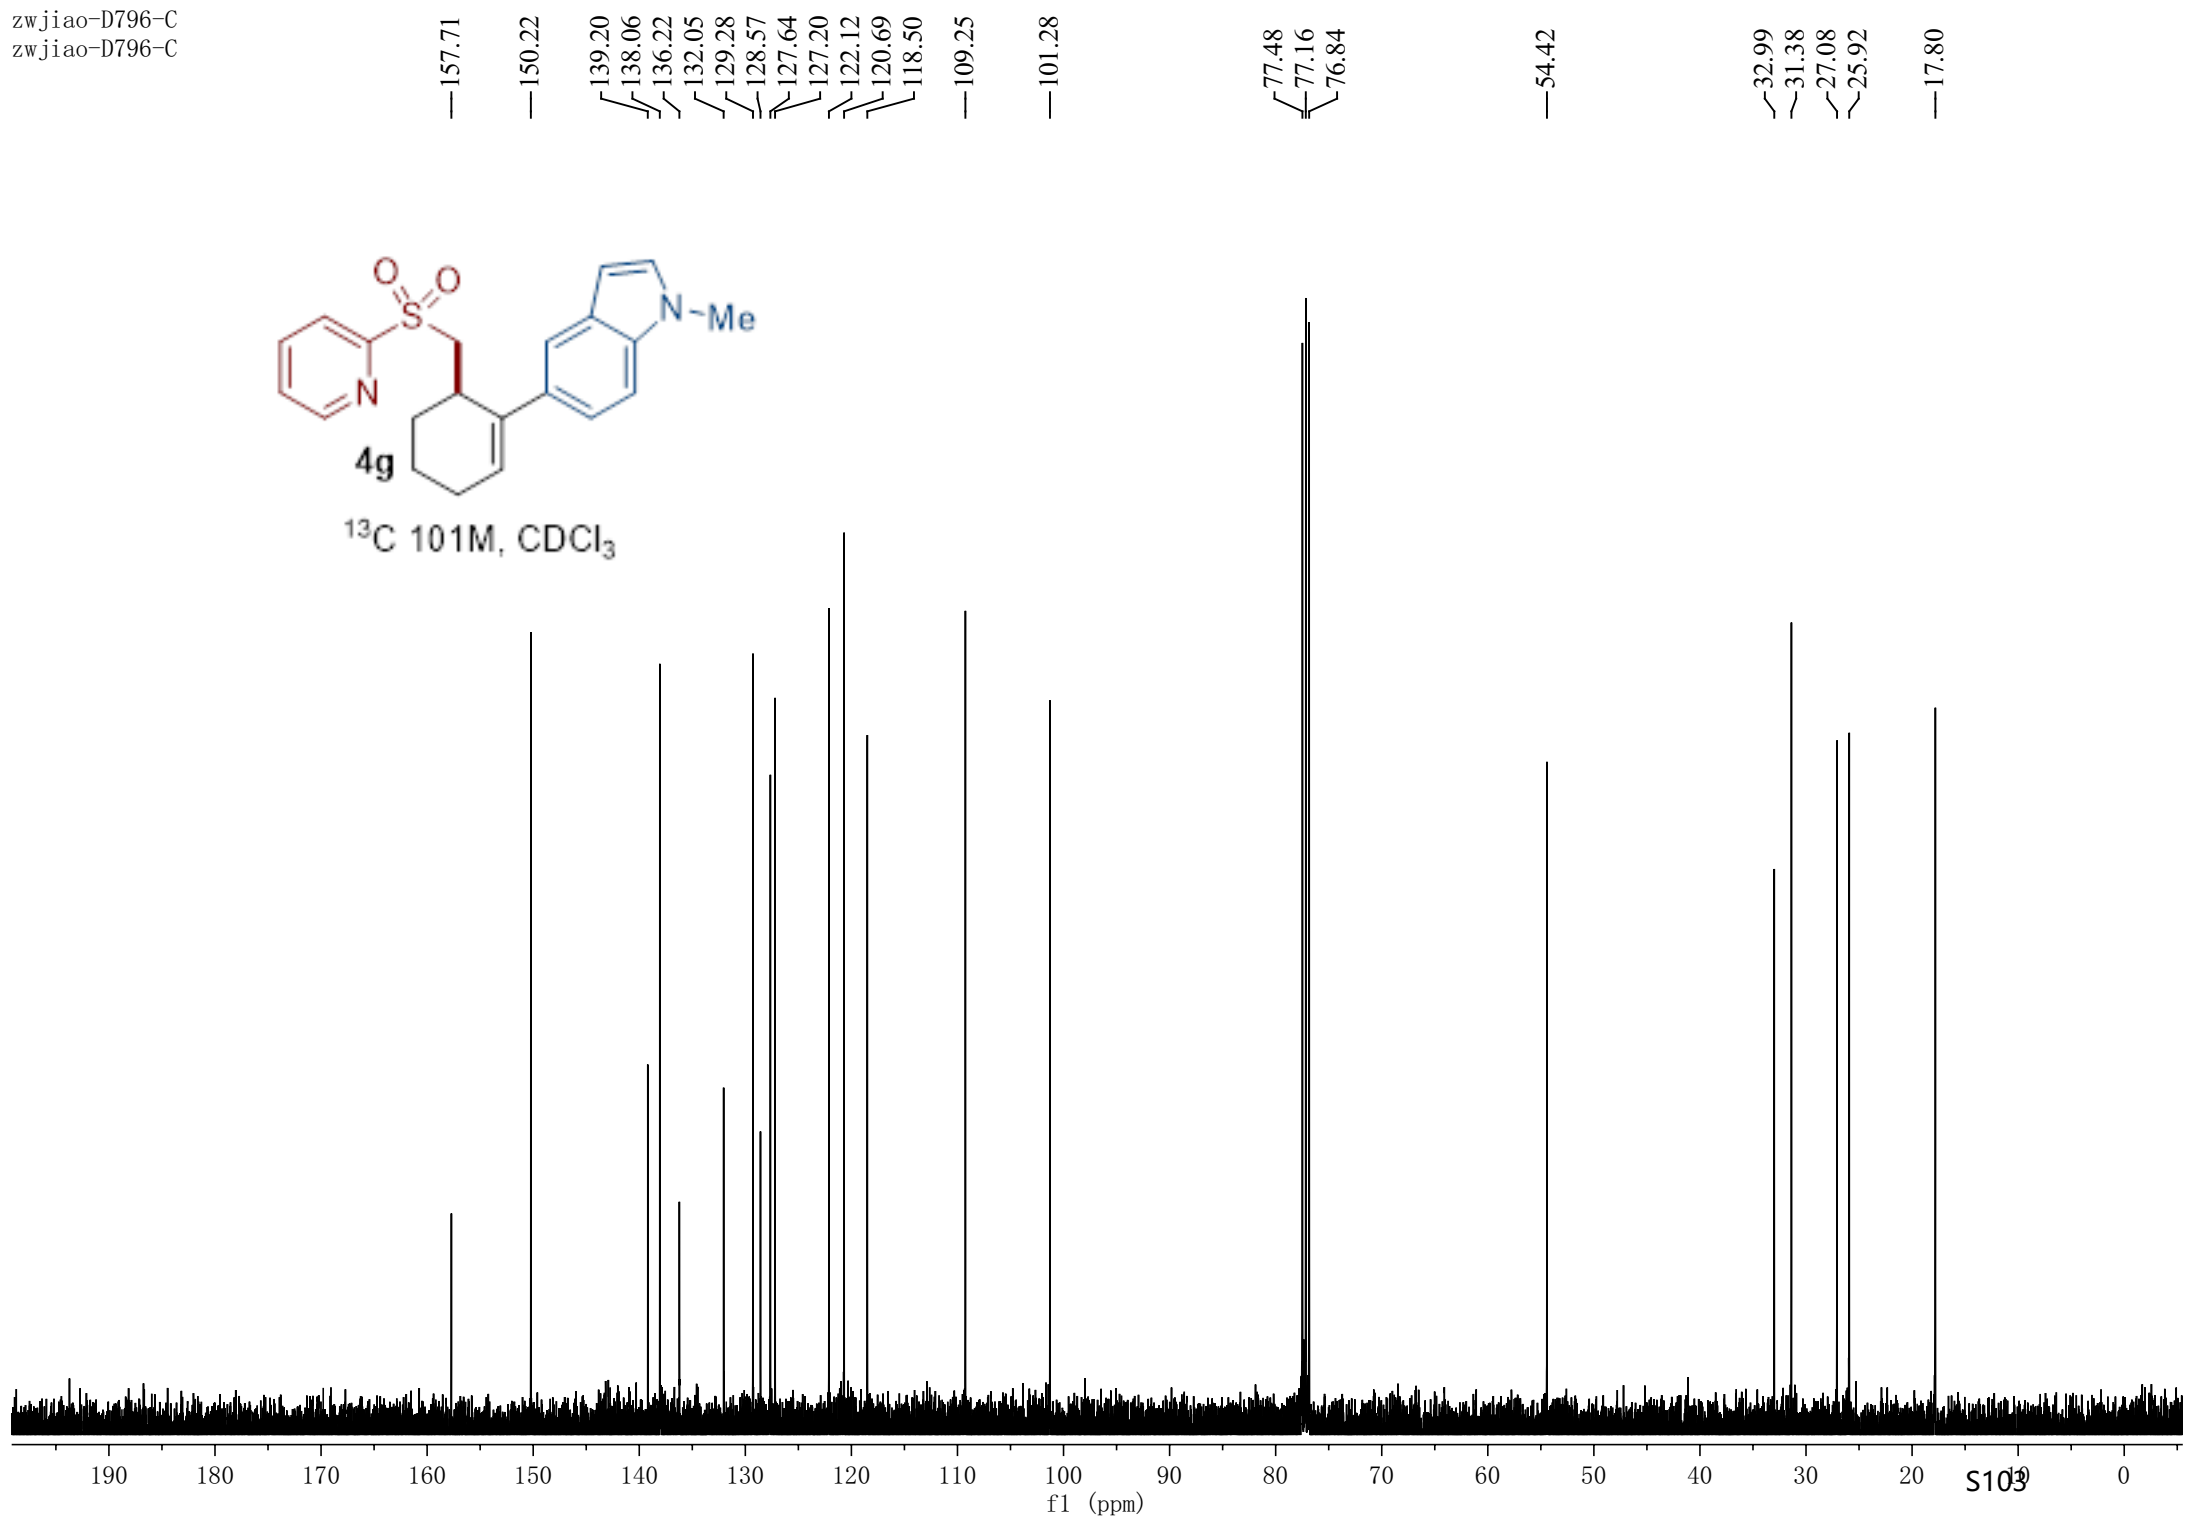

8.72, 8.71, 8.70, 8.11, 8.11, 8.11, 8.09, 8.09, 8.09, 7.98, 7.98, 7.96, 7.96, 7.94, 7.94, 7.56, 7.56, 7.55, 7.55, 7.54, 7.54, 7.53, 7.53, 7.26, 7.26, 7.23, 7.22, 7.22, 7.21, 7.15, 7.14, 7.14, 7.10, 7.10, 7.09, 7.08, 6.20, 6.19, 6.18, 6.18, 3.50, 3.49, 3.46, 3.42, 3.42, 3.38, 2.21, 2.19, 2.19, 2.18, 2.18, 2.17, 2.16, 2.15, 2.15, 1.79, 1.78, 1.70, 1.69, 1.68, 1.67, 1.65, 1.64, 1.64, 1.63, 1.62, 1.61

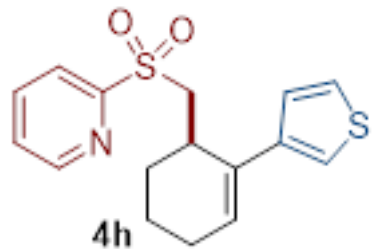

<sup>1</sup>H 400M, CDCl<sub>3</sub>

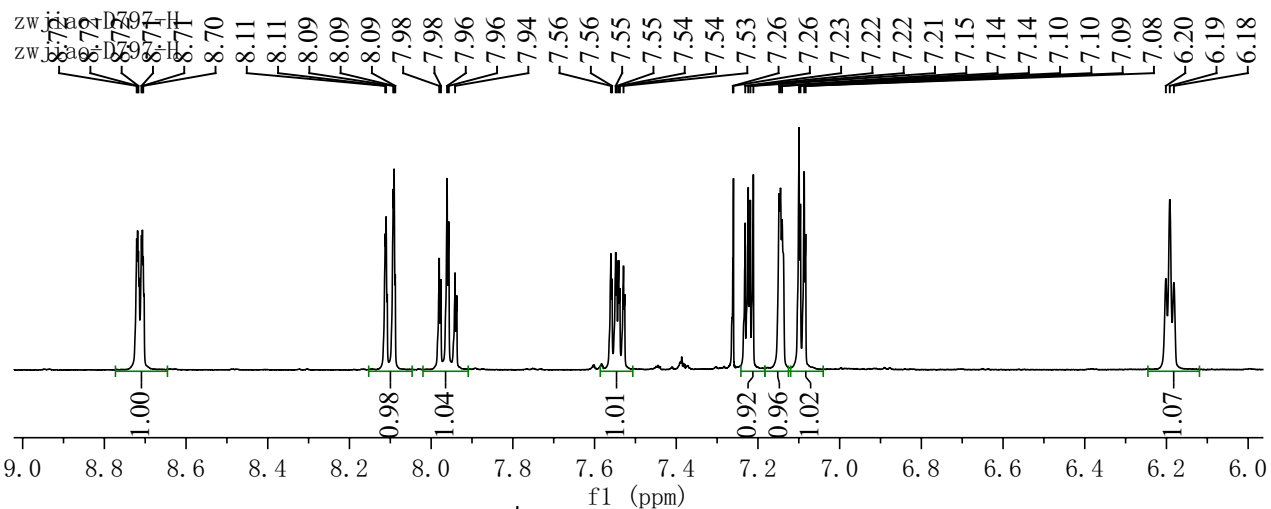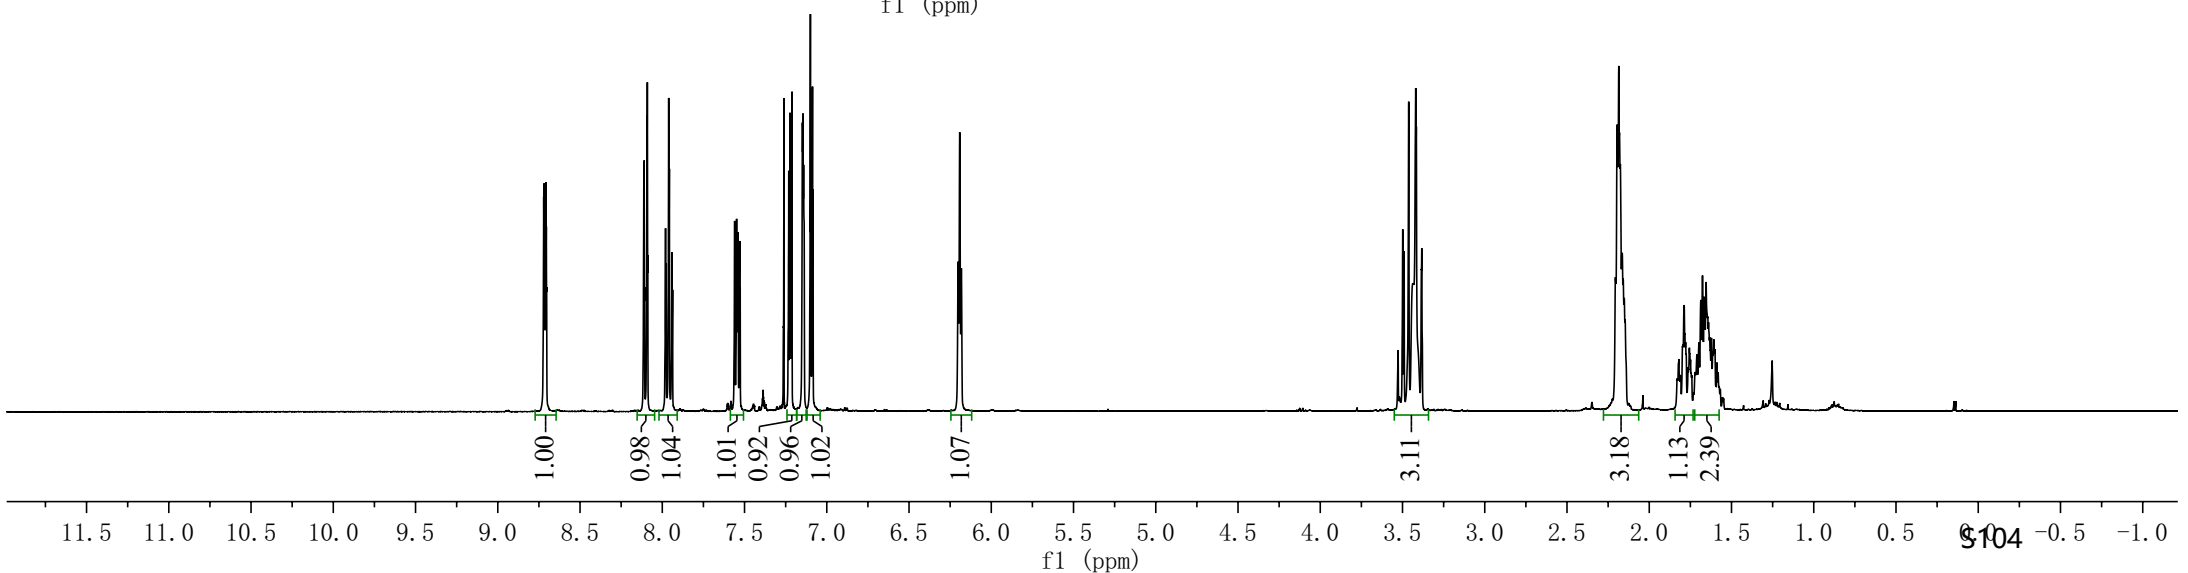



zwjiao-D797-C  
zwjiao-D797-H

—157.90  
—150.36  
~141.35  
~138.33  
~133.07  
~127.48  
~127.43  
~125.88  
~125.38  
~122.14  
~119.29

~77.48  
~77.16  
~76.84

—54.12

~30.44  
~26.50  
~25.46

—17.16

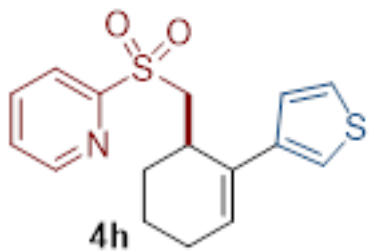

<sup>13</sup>C 101M, CDCl<sub>3</sub>

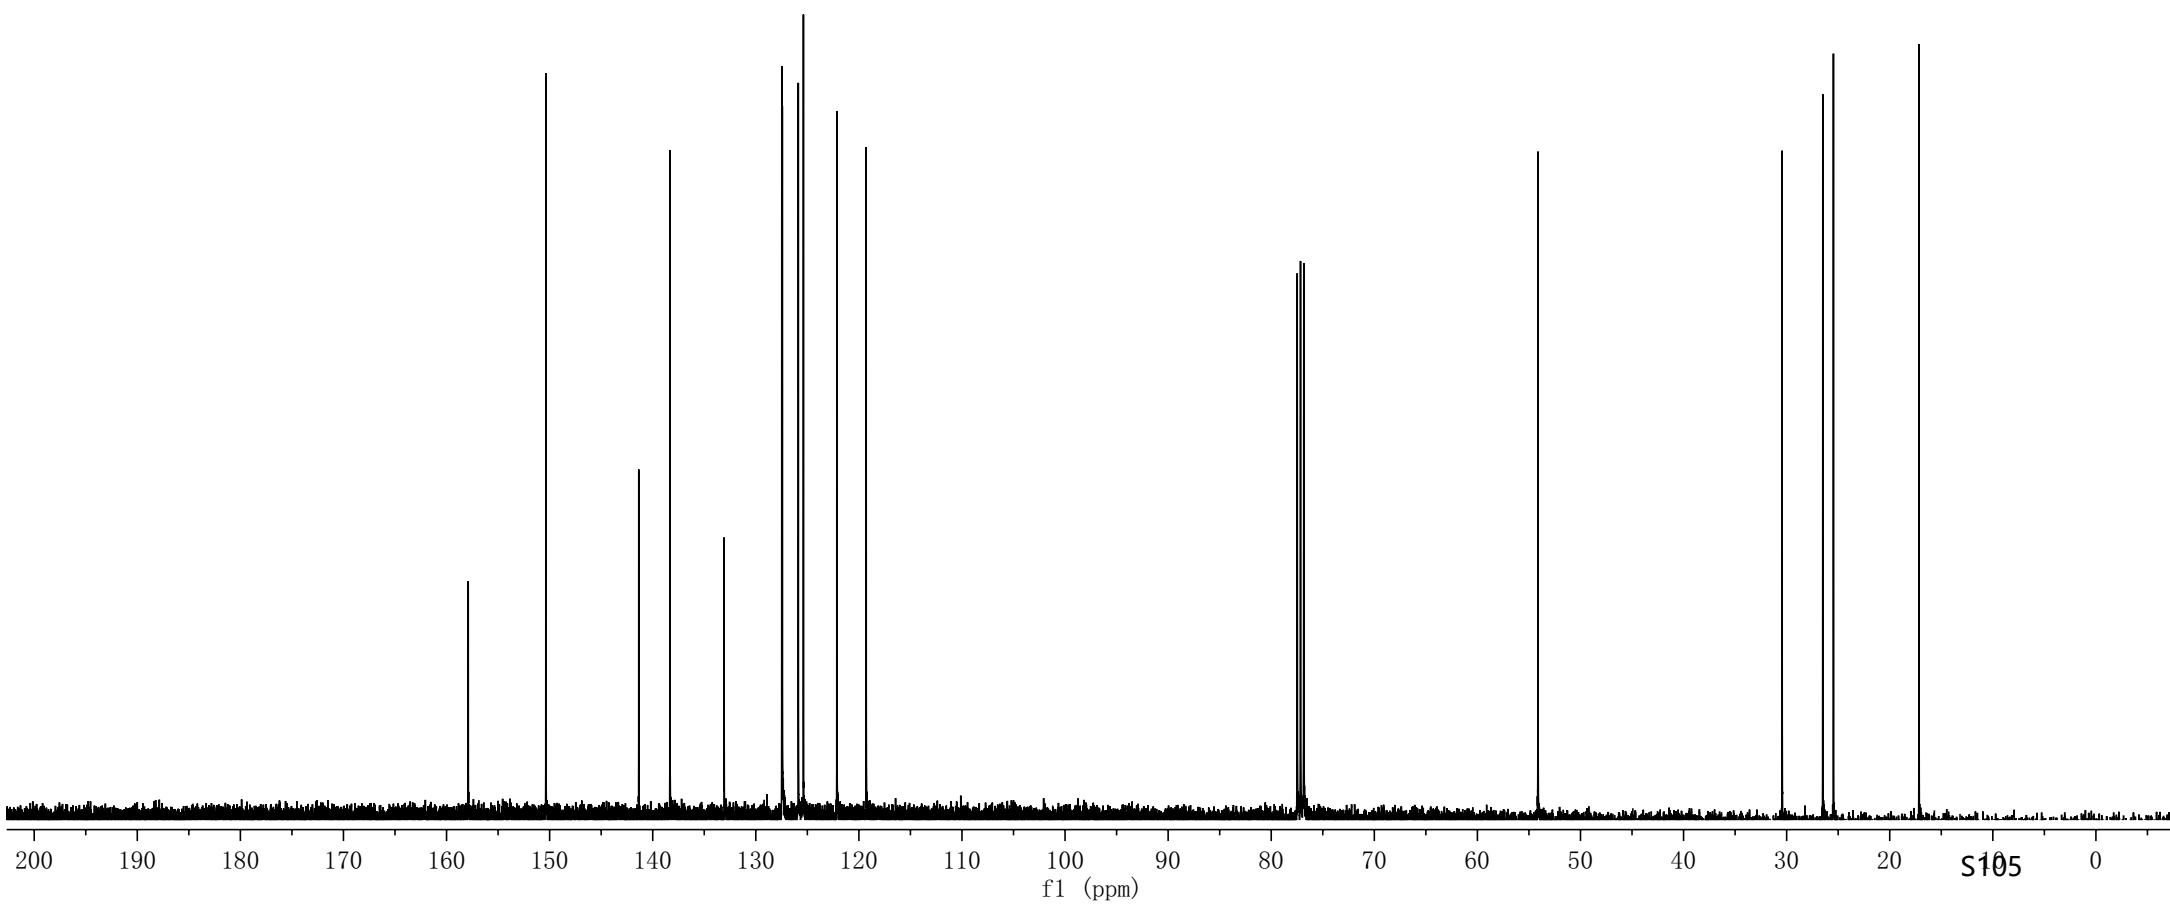

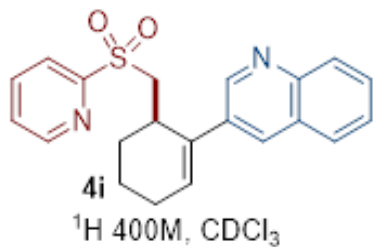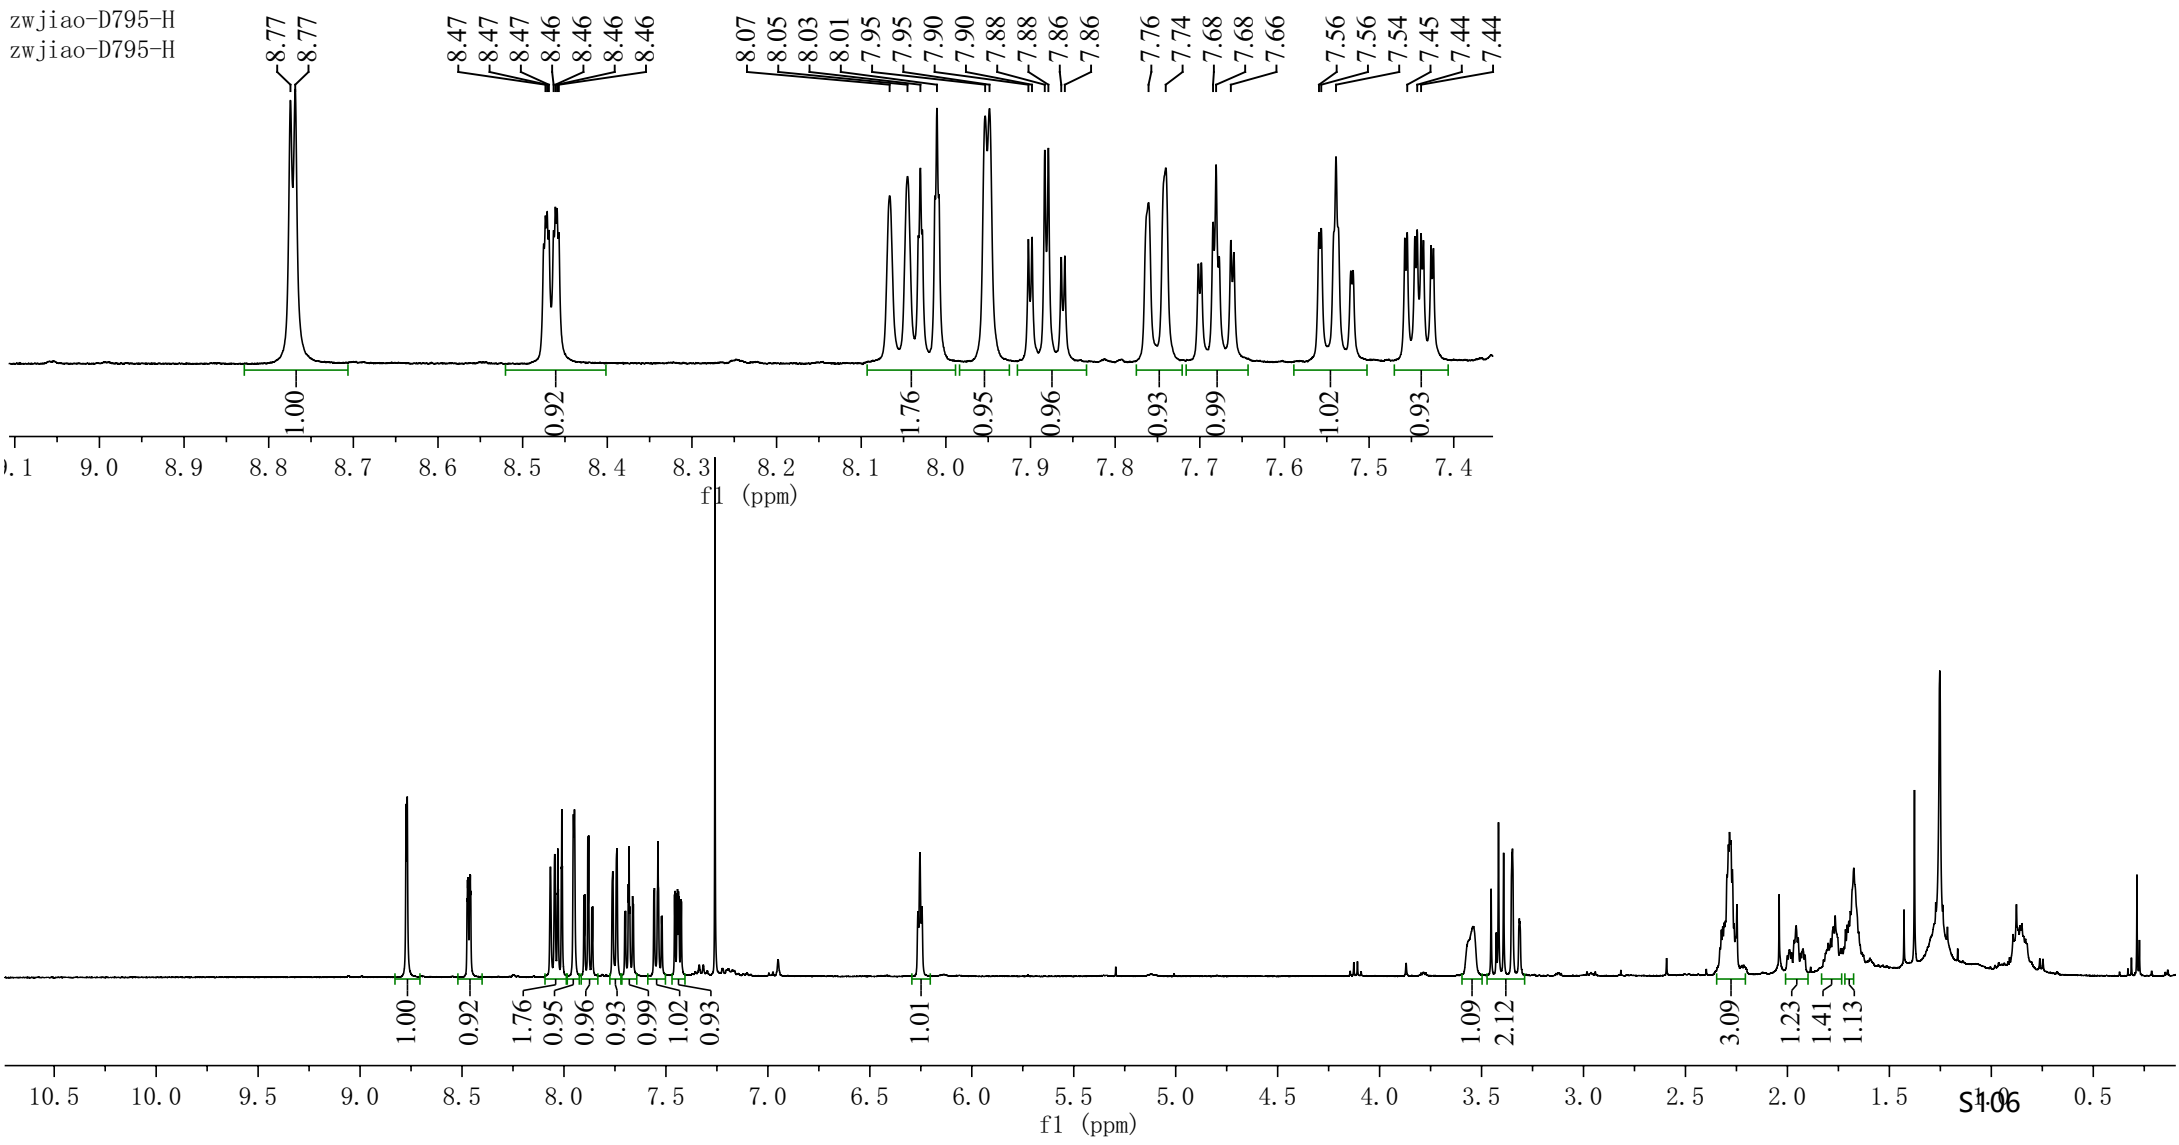

zwjiao-D795C-1  
zwjiao-D795C

157.56  
150.26  
149.71  
147.43  
138.24  
132.92  
132.17  
131.51  
129.38  
129.16  
128.24  
127.46  
127.97

77.48  
77.16  
76.84

53.88

30.47  
27.00  
26.00

17.34

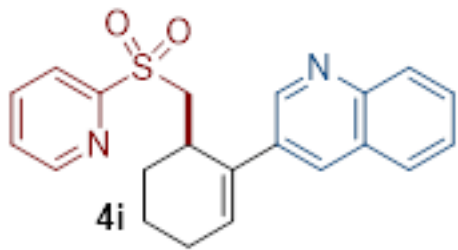

<sup>13</sup>C 101M, CDCl<sub>3</sub>

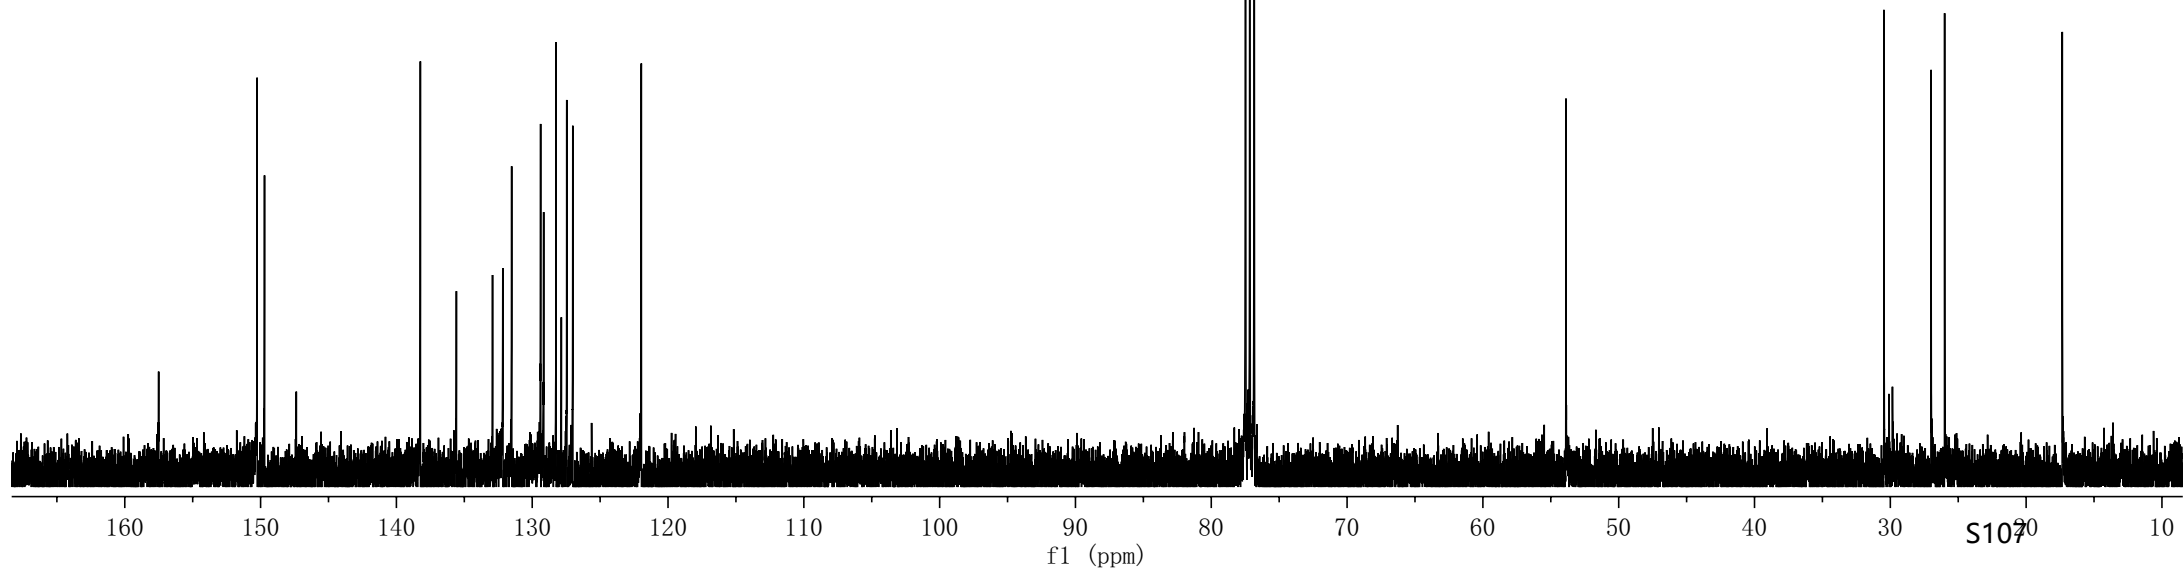

8.59  
8.59  
8.59  
8.58  
8.58  
8.58  
8.58  
8.57  
8.57  
8.57  
8.03  
8.01  
8.01  
7.90  
7.89  
7.88  
7.87  
7.86  
7.85  
7.46  
7.46  
7.45  
7.45  
7.44  
7.44  
7.43  
7.43  
7.29  
7.28  
7.27  
7.27  
7.26  
7.25  
7.21  
7.19  
7.19  
7.17  
7.15  
7.15  
7.13  
5.91  
5.87  
5.74  
5.73  
5.72  
5.66  
5.65  
5.63  
5.61  
5.59  
3.53  
3.50  
3.44  
3.42  
3.41  
3.38  
3.37  
3.35  
3.16  
3.13  
2.16  
2.15  
2.14  
2.12  
2.12  
2.04  
1.66  
1.65  
1.61  
1.60  
1.59  
1.58  
1.57

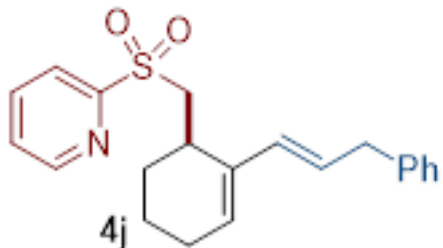

$^1\text{H}$  400M,  $\text{CDCl}_3$

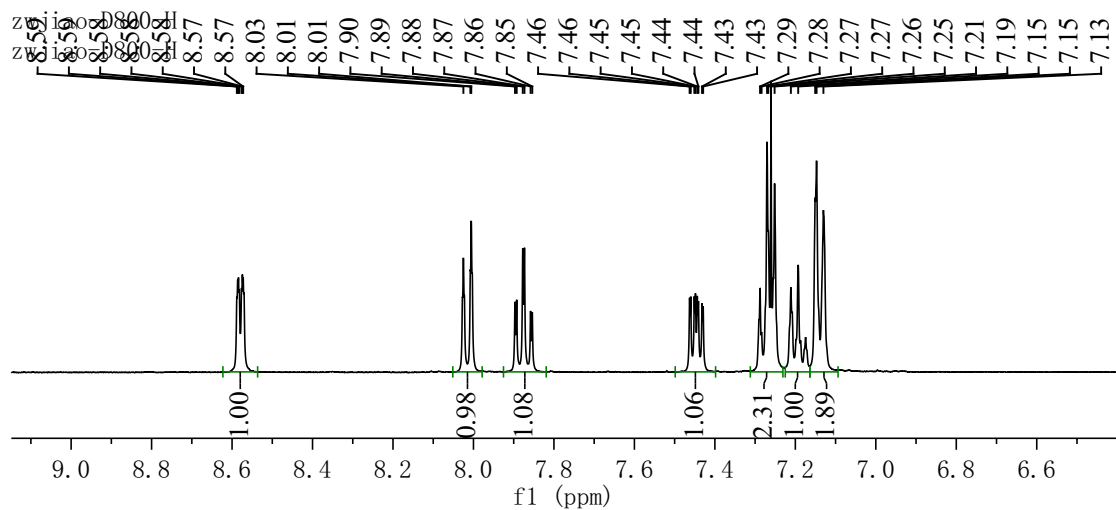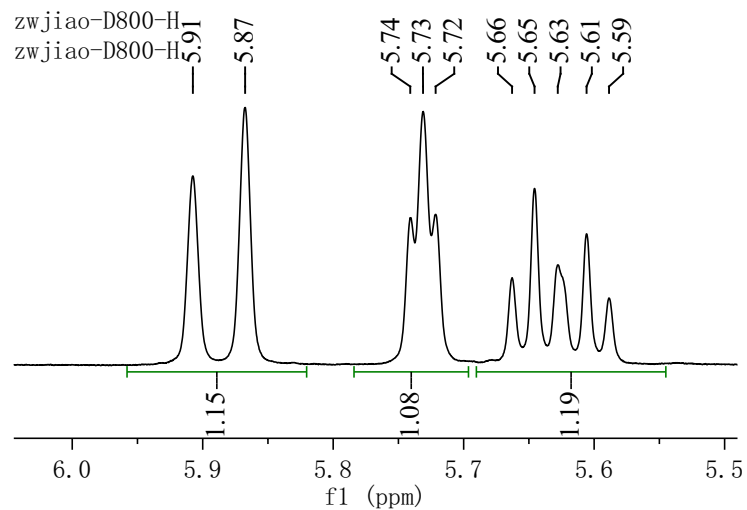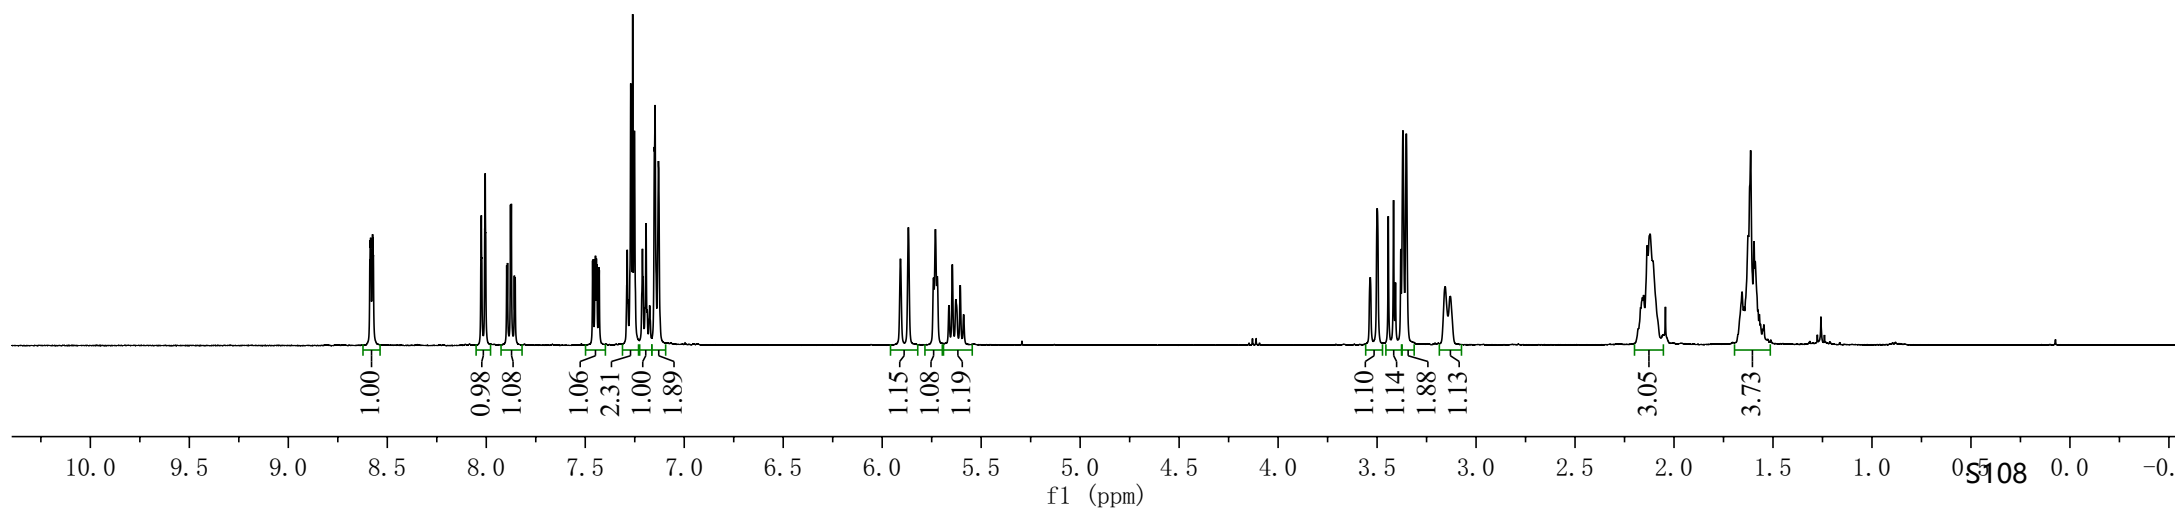

zwjiao-D800-C  
zwjiao-D800-C

—157.82  
—150.32  
140.55  
138.22  
135.96  
132.27  
130.87  
128.69  
128.50  
127.38  
126.09  
122.26

77.48  
77.16  
76.84

—54.00

—39.34

27.96  
25.71  
25.47

—17.12

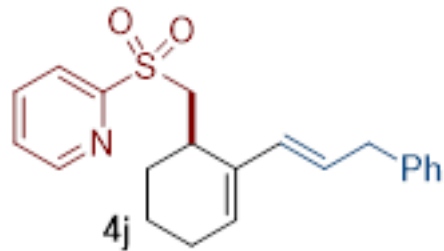

<sup>13</sup>C 101M, CDCl<sub>3</sub>

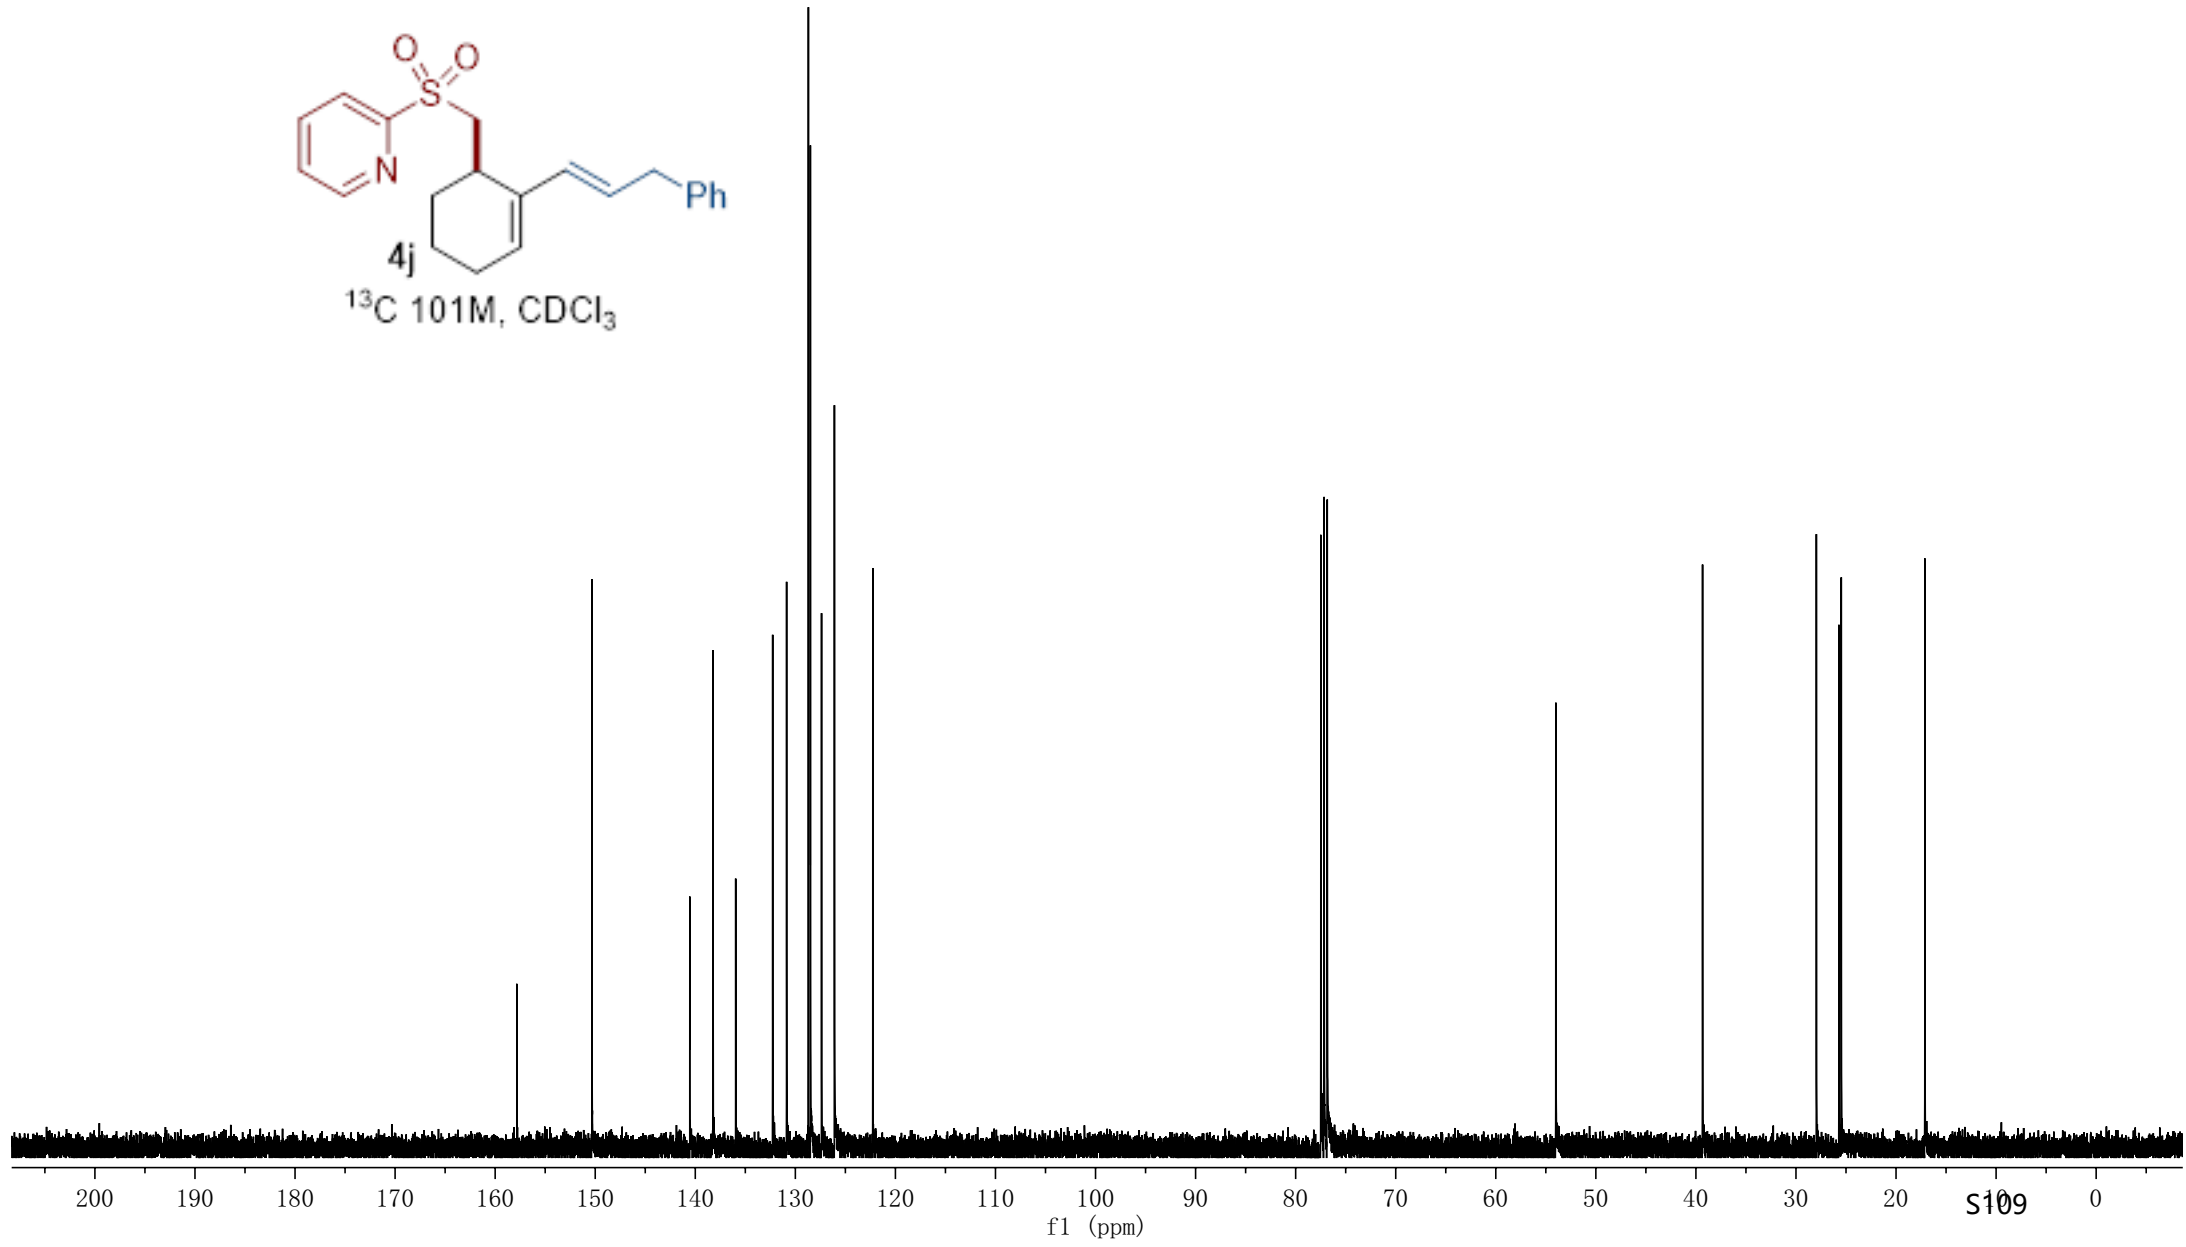

zwjiao-D864-H  
zwjiao-D864-H

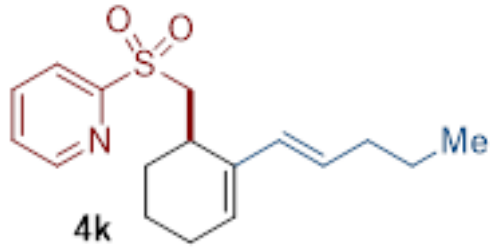

<sup>1</sup>H 400M, CDCl<sub>3</sub>

8.75 8.75 8.74 8.74 8.74  
8.13 8.11 7.97 7.97 7.57 7.57 7.56 7.55 7.55 7.55 7.26 7.26 7.54 7.54 5.79 5.68 5.67 5.66 5.58 5.56 5.55 5.52 5.51  
3.53 3.53 3.49 3.49 3.46 3.44 3.43 3.40 3.17 3.15  
2.09 2.09 2.01 1.99 1.59 1.37 1.35 0.87 0.85

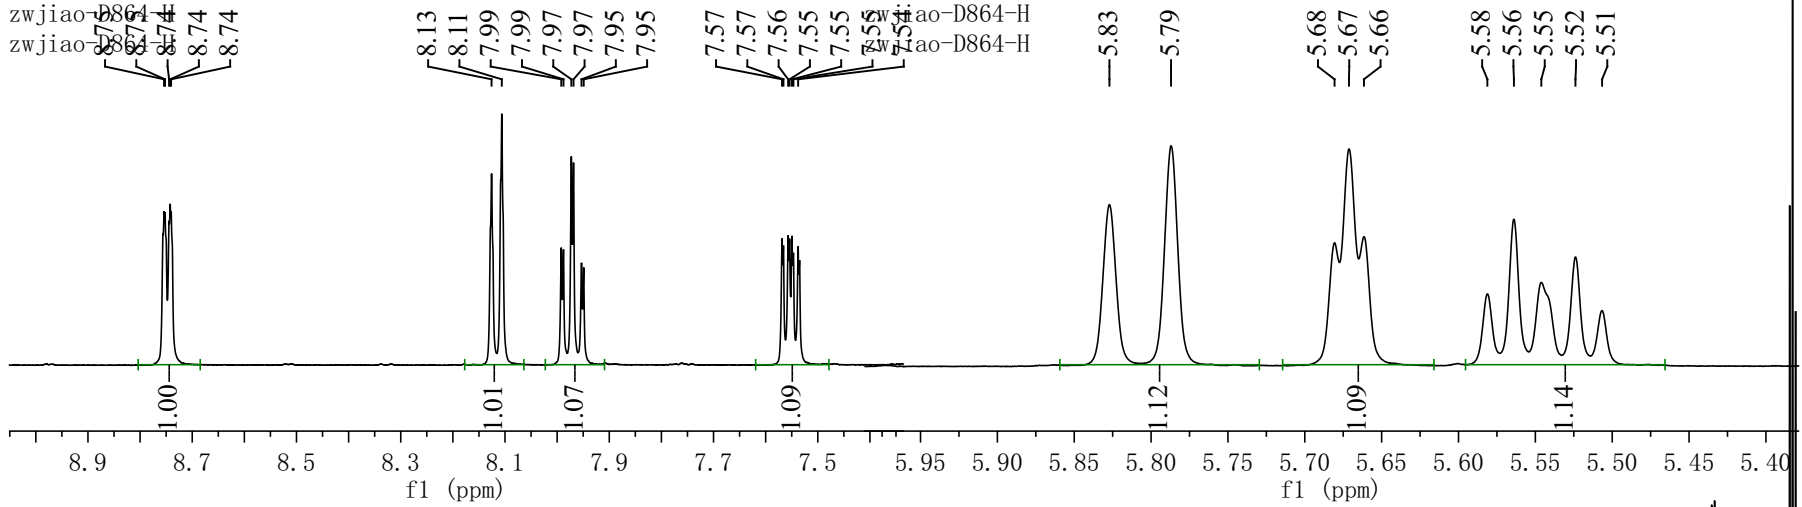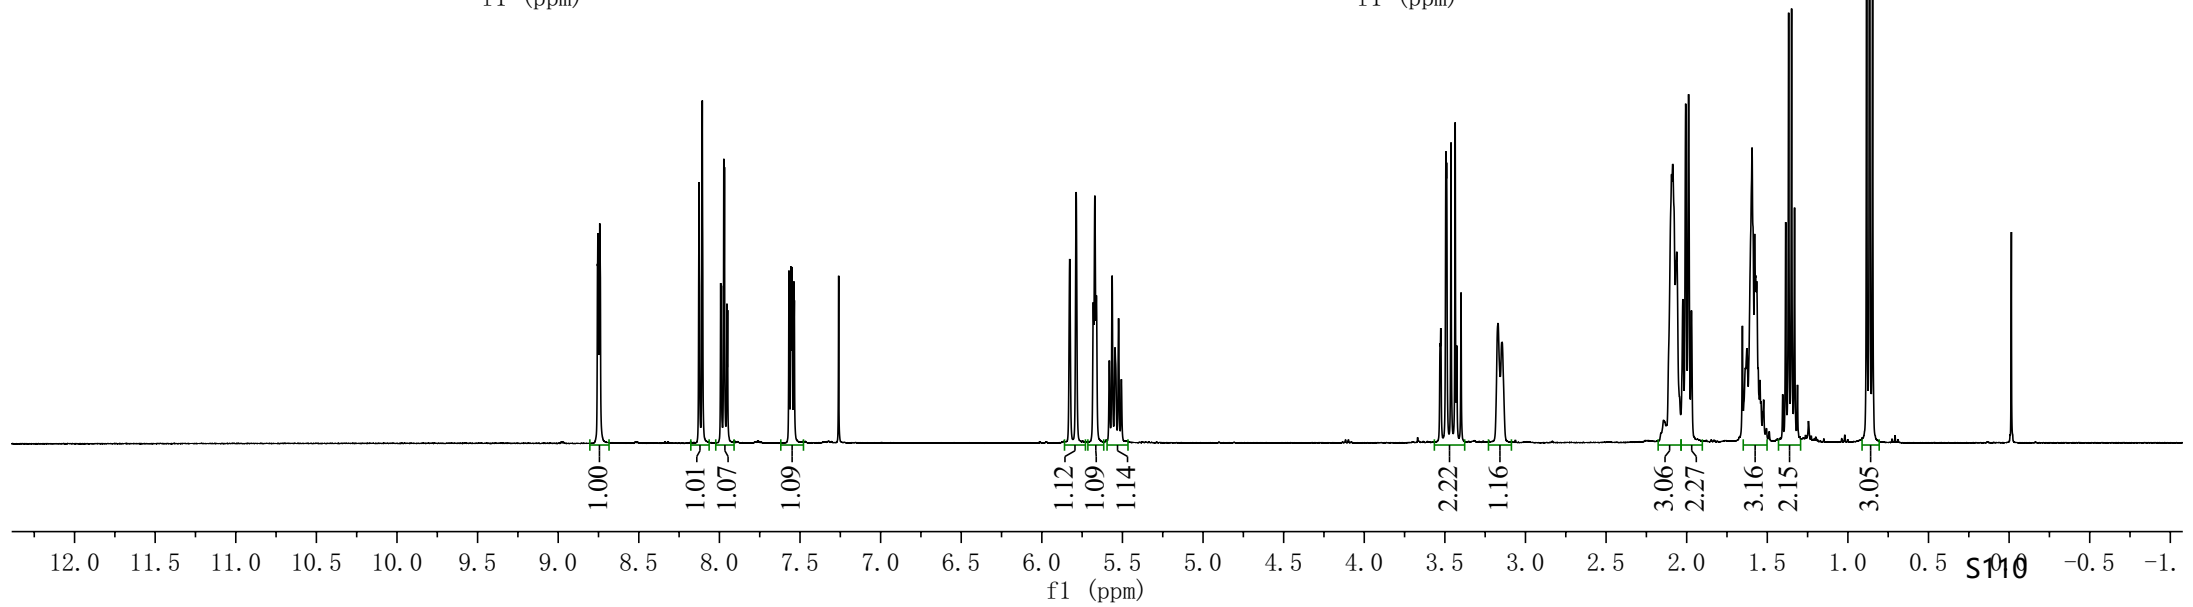

zwjiao-D864-C  
zwjiao-D864-C

—158.09  
—150.34  
~138.31  
~136.17  
~130.95  
~129.66  
~127.96  
~127.43  
~122.19

~77.48  
~77.16  
~76.84

—53.89

—35.13  
~27.92  
~25.75  
~25.40  
~22.72  
~17.17  
~13.80

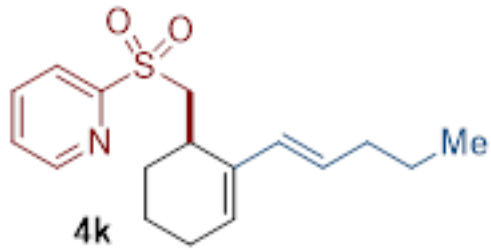

<sup>13</sup>C 101M, CDCl<sub>3</sub>

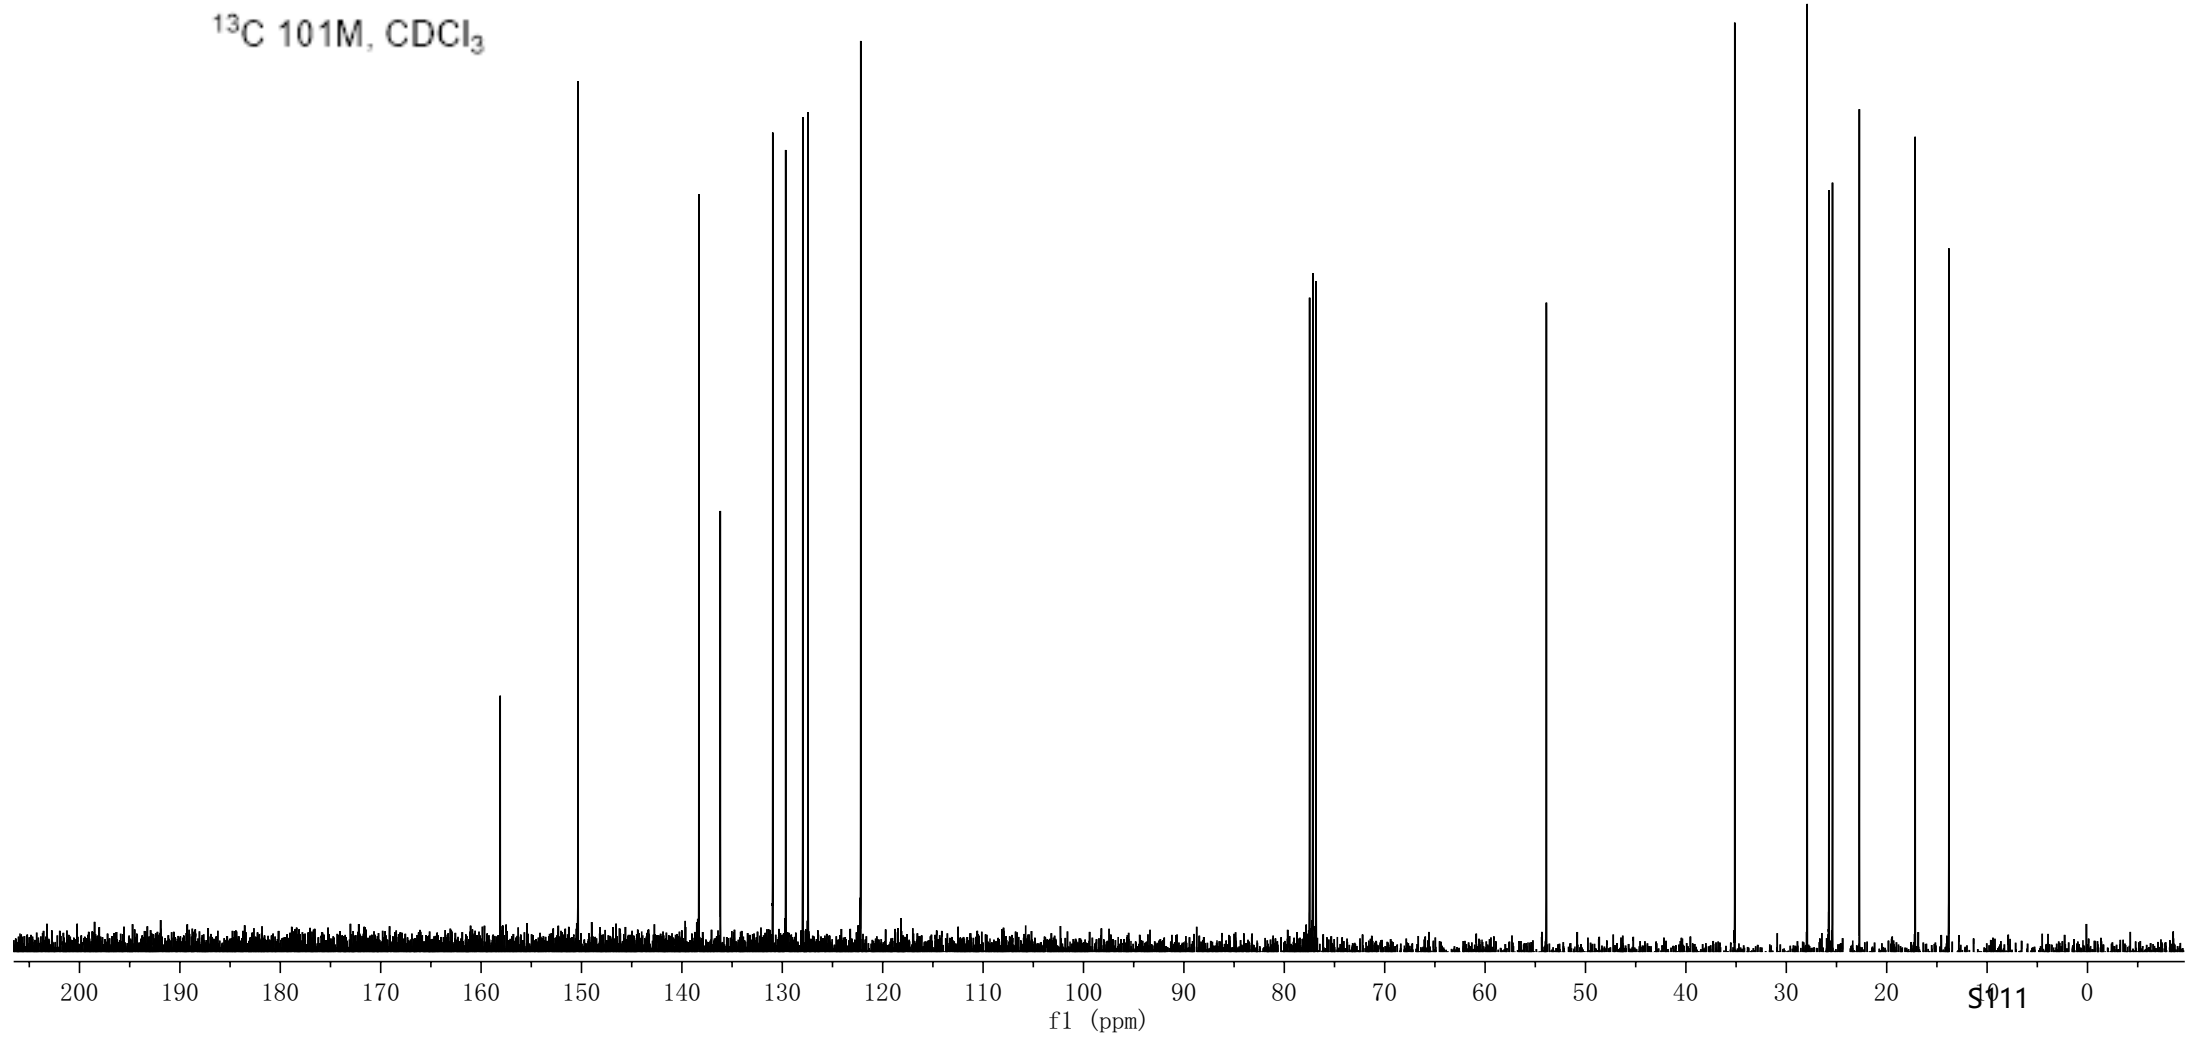

zwjiao-D827-H  
zwjiao-D827-H

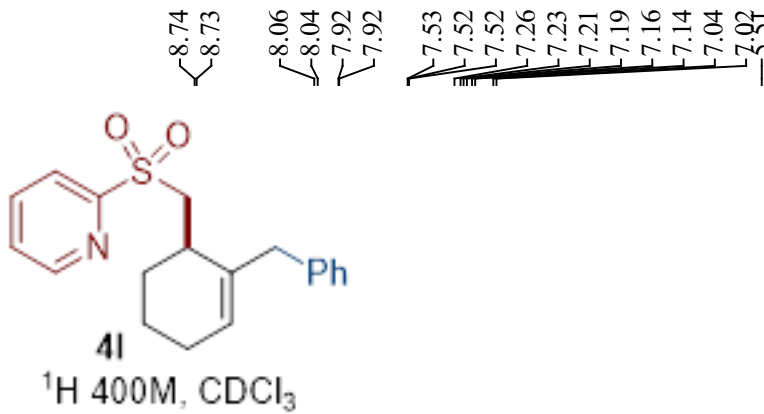

8.74  
8.73  
8.06  
8.04  
7.92  
7.92  
7.53  
7.52  
7.52  
7.26  
7.23  
7.21  
7.19  
7.16  
7.14  
7.04  
7.02  
3.91

3.62  
3.58  
3.58  
3.39  
3.36  
3.35  
3.33  
3.29  
3.25  
3.16  
3.12  
2.56  
2.54  
2.04  
2.01  
1.98  
1.97  
1.96  
1.96  
1.95  
1.60  
1.57  
1.55  
1.54  
1.52

zwjiao-D827-H  
zwjiao-D827-H

8.74  
8.73  
8.06  
8.04  
7.94  
7.93  
7.92  
7.92  
7.90  
7.90  
7.54  
7.53  
7.52  
7.52  
7.26  
7.23  
7.21  
7.19  
7.16  
7.14  
7.04  
7.02

zwjiao-D827-H  
zwjiao-D827-H  
3.62  
3.58  
3.58  
3.39  
3.36  
3.35  
3.33  
3.29  
3.25  
3.16  
3.12

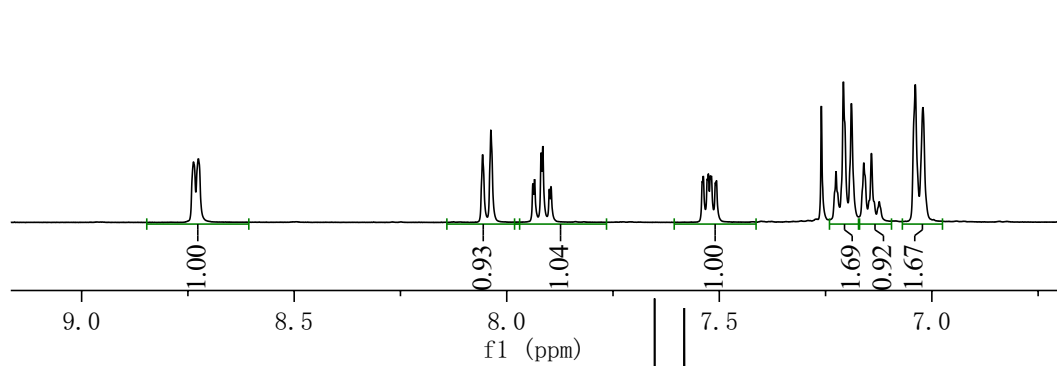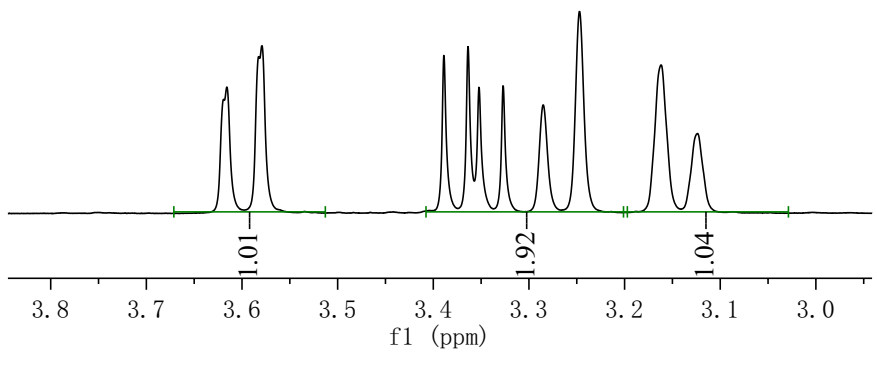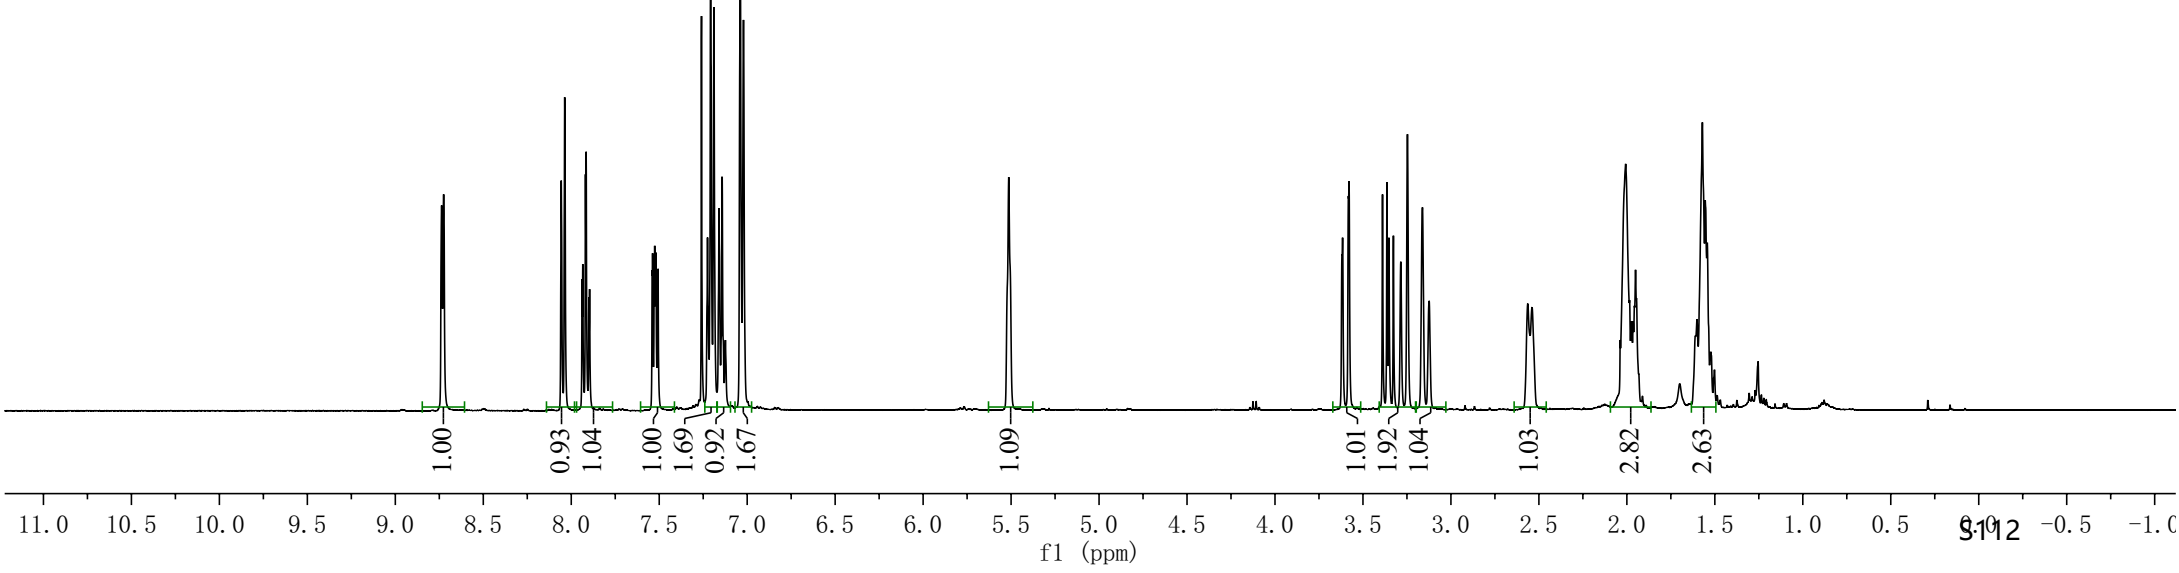



zwjiao-D827-C  
zwjiao-D827-C

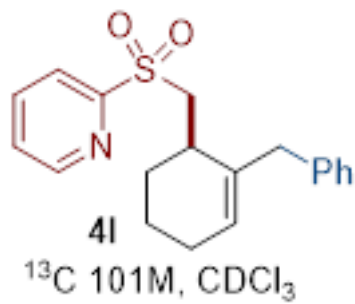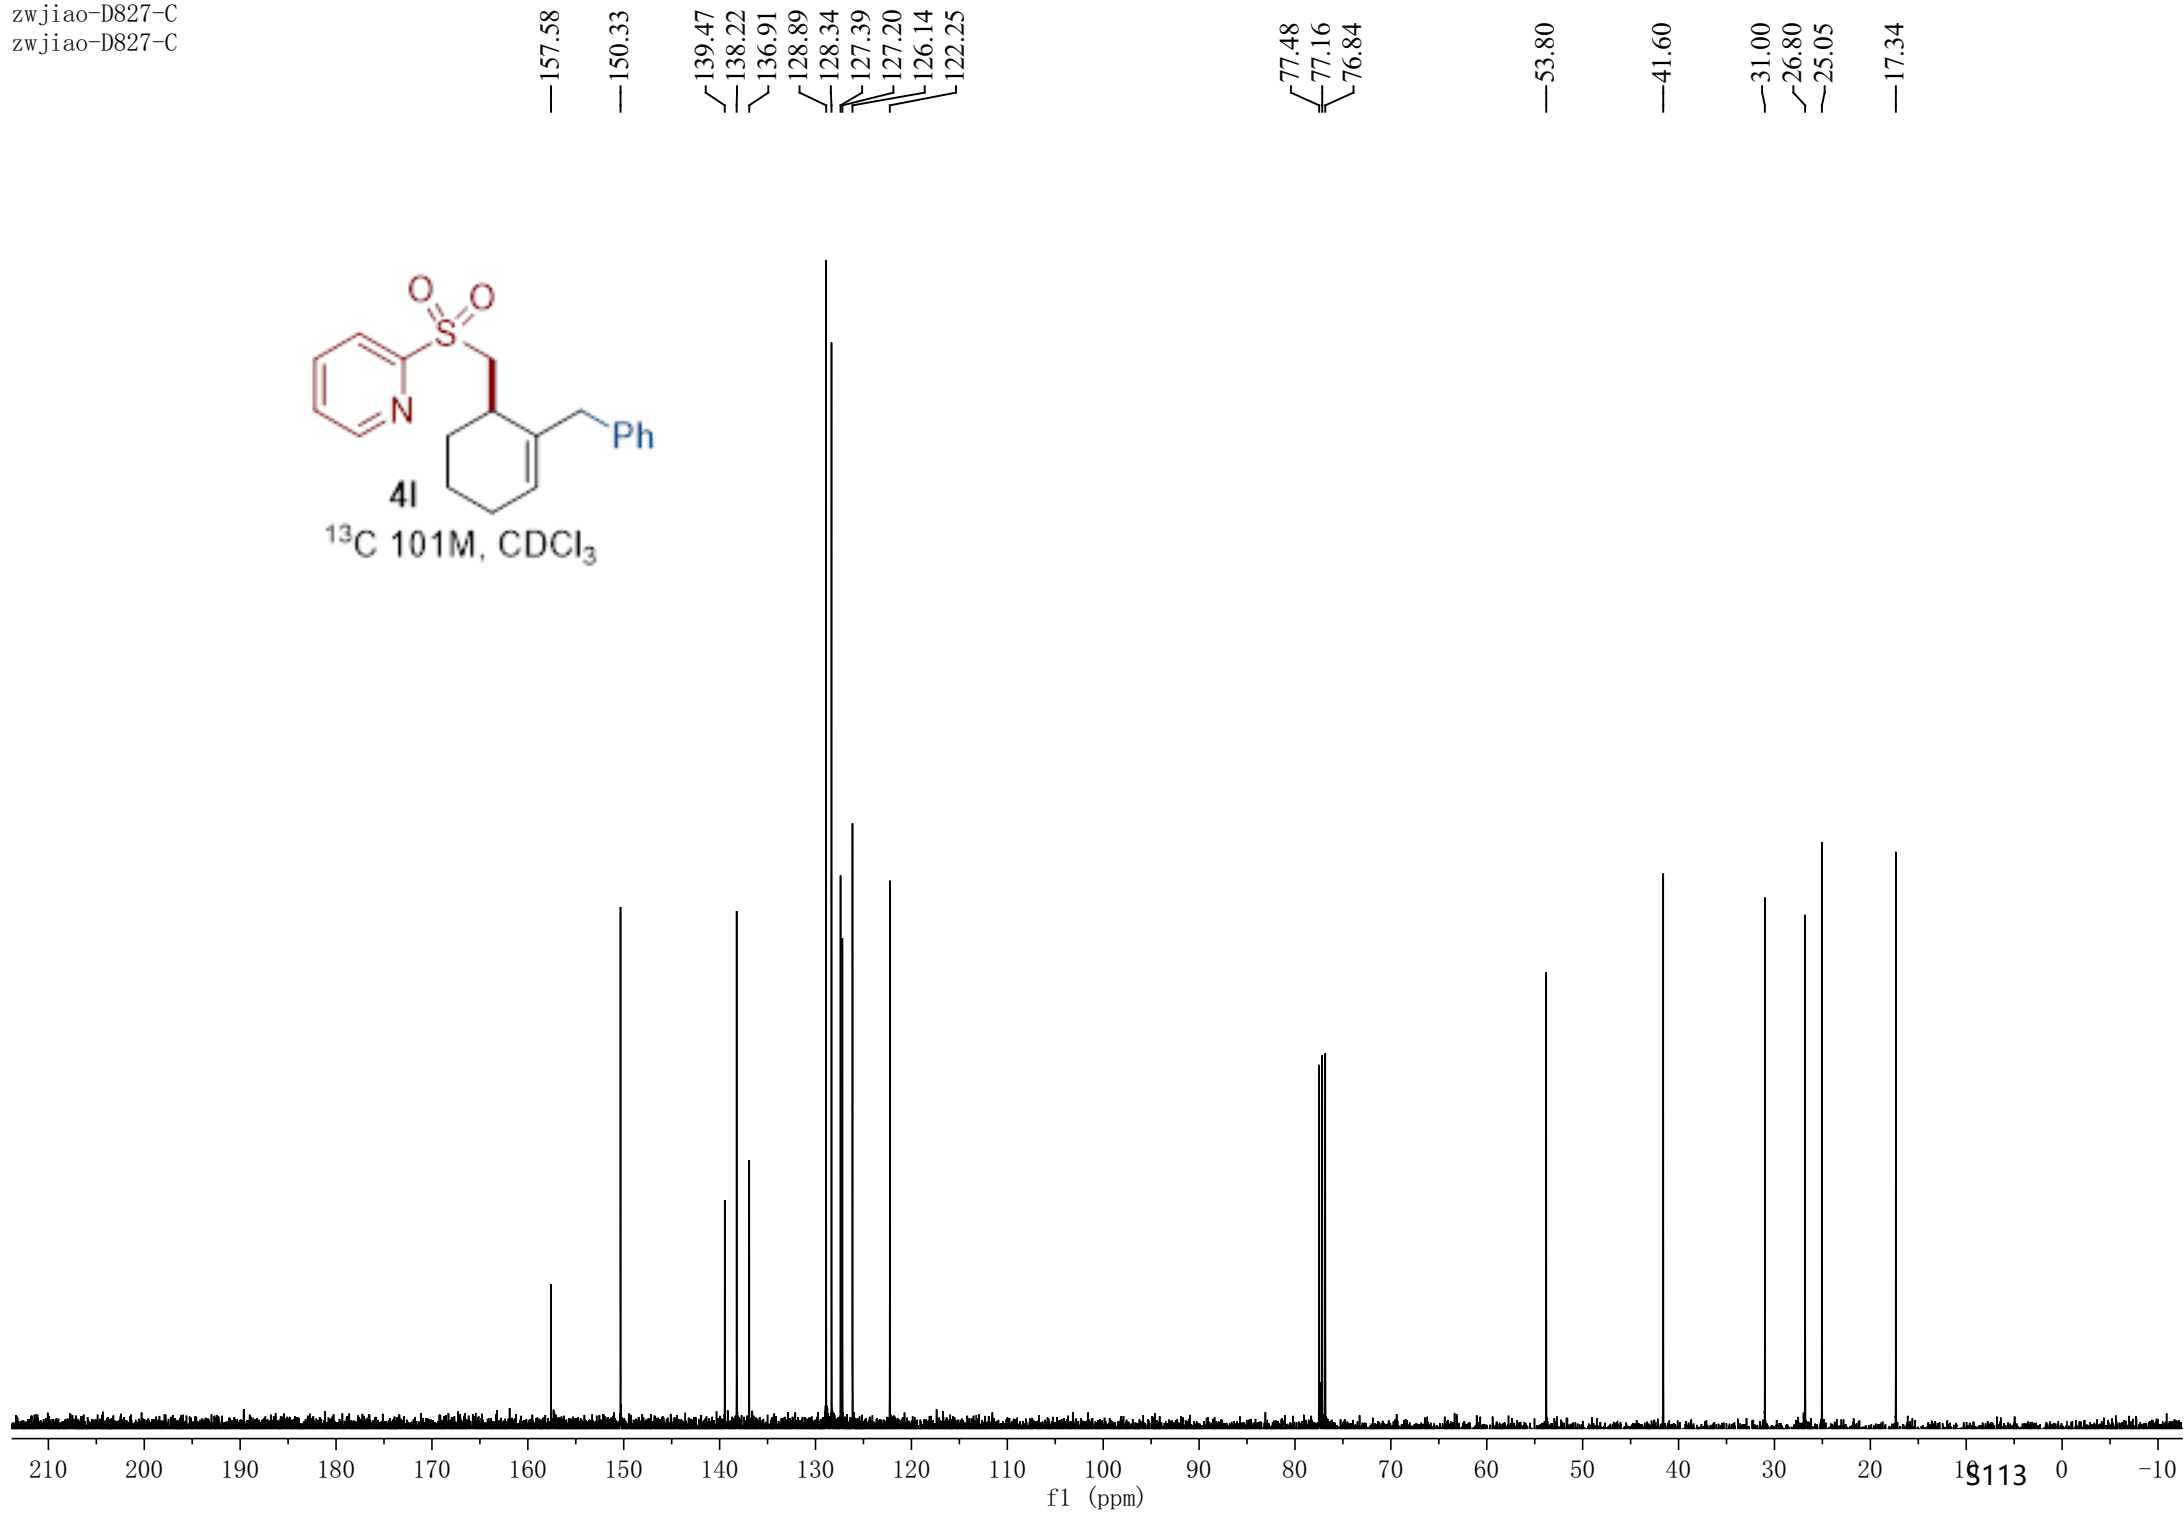

zwjiao-D828-p-H  
zwjiao-D828-p-H

8.76  
8.75  
8.13  
8.11  
7.99  
7.99  
7.64  
7.62  
7.59  
7.58  
7.58  
7.57  
7.32  
7.30  
7.26  
5.85  
5.84  
5.83  
5.82  
5.82  
5.72  
5.70  
3.74  
3.70  
3.54  
3.52  
3.51  
3.49  
3.42  
3.40  
3.39  
3.37  
3.36  
3.33  
3.32  
3.04  
3.03  
3.01  
2.92

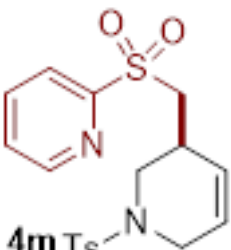

4mTs

<sup>1</sup>H 400M, CDCl<sub>3</sub>

zwjiao-D828-p-H  
zwjiao-D828-p-H

8.76  
8.75  
8.13  
8.11  
8.01  
8.01  
7.99  
7.99  
7.97  
7.97  
7.64  
7.62  
7.59  
7.58  
7.58  
7.57  
7.32  
7.30  
7.26

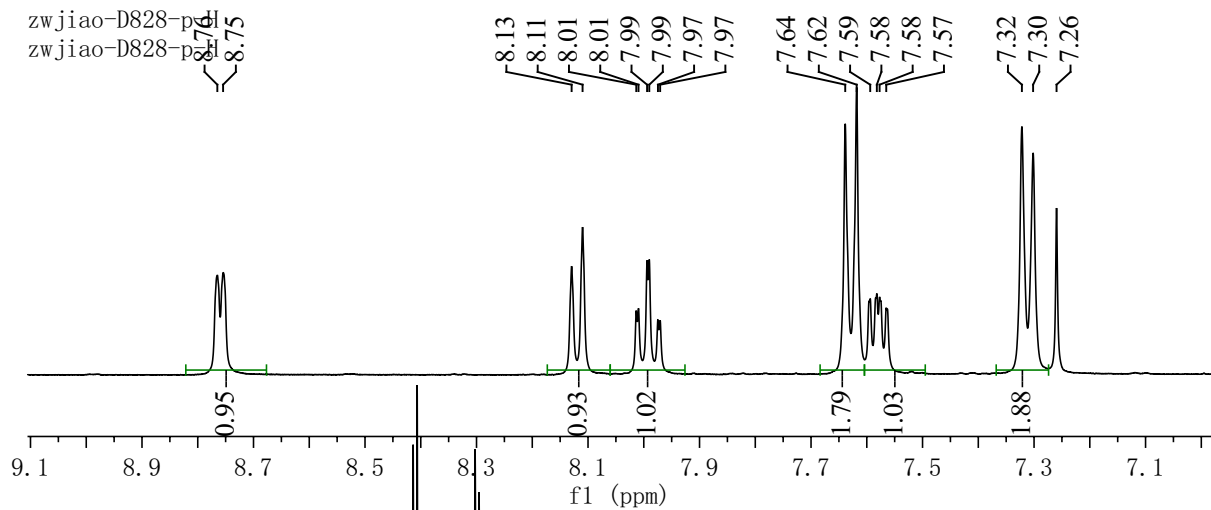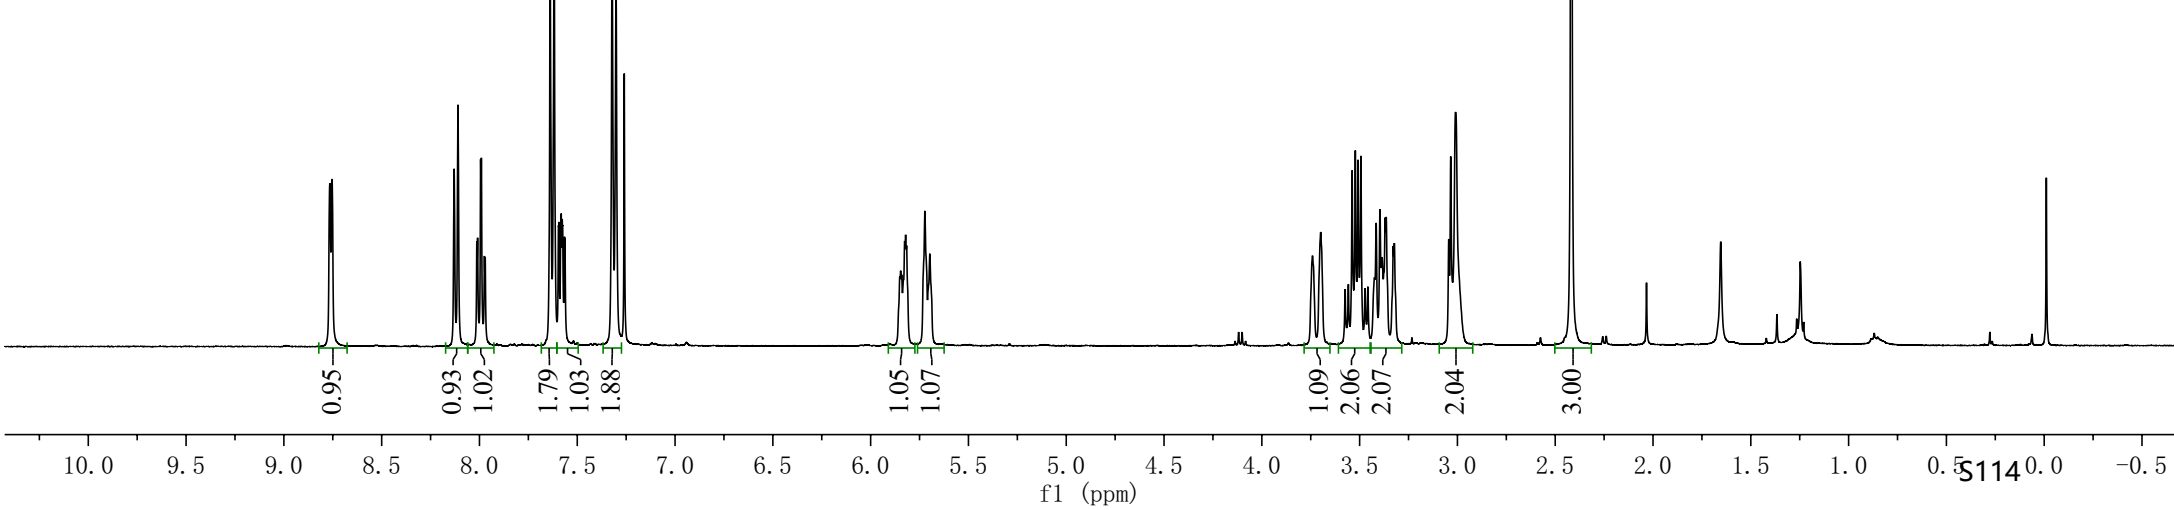

zwjiao-D828-p-C  
zwjiao-D828-p-C

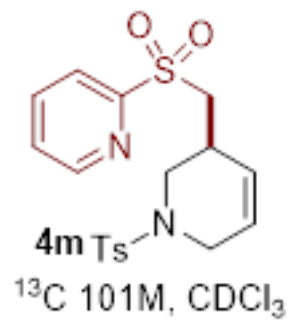

— 157.57  
— 150.44  
~ 143.97  
~ 138.50  
~ 133.05  
~ 129.90  
~ 127.75  
~ 127.70  
~ 127.00  
~ 124.75  
~ 122.22

77.48  
77.16  
76.84

— 54.68

~ 47.15  
~ 44.93

— 30.31

— 21.66

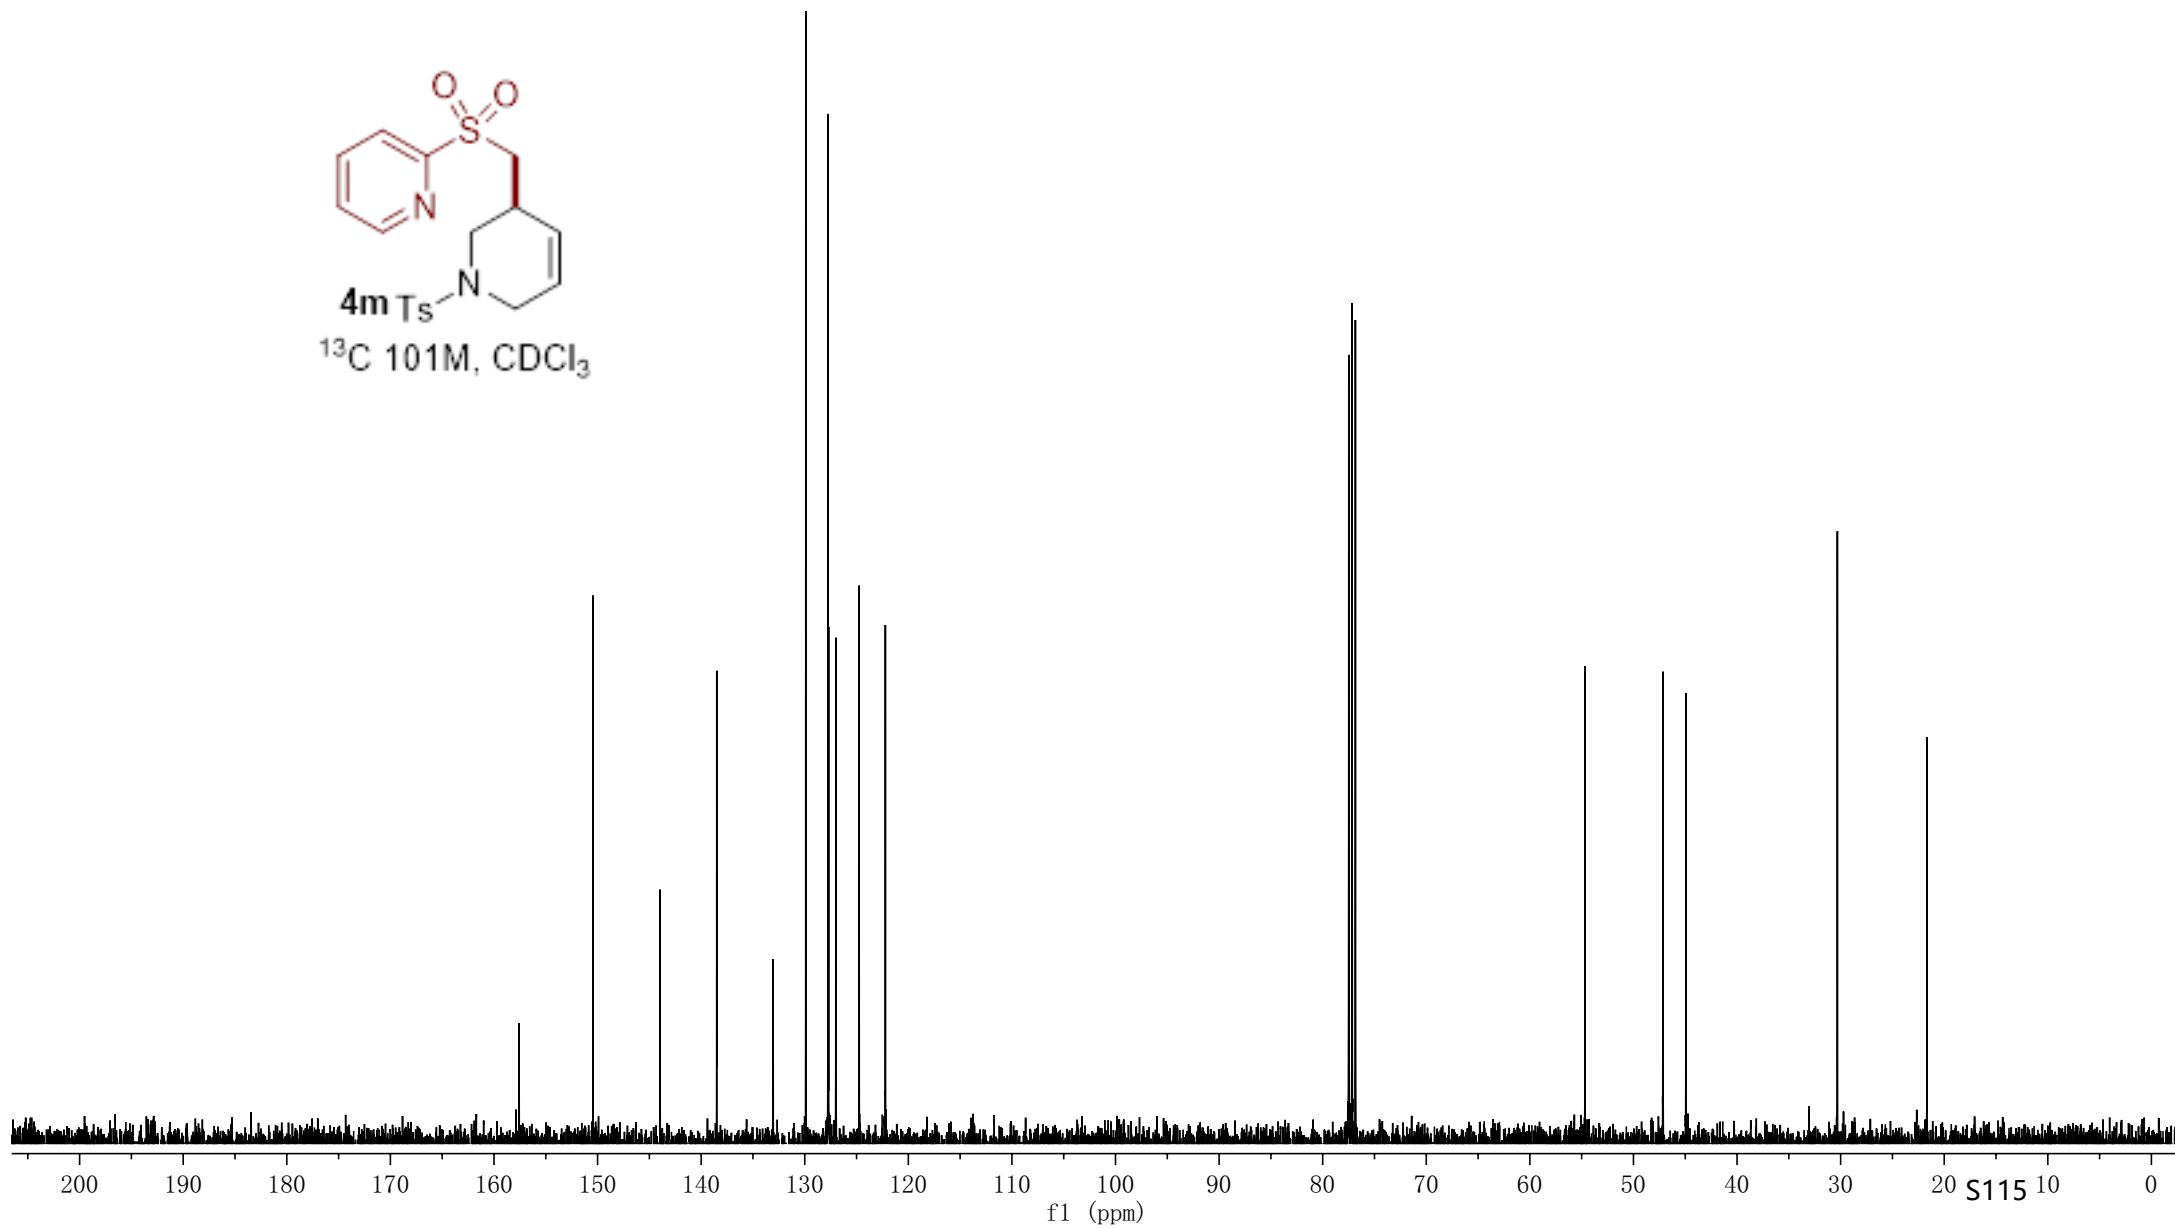

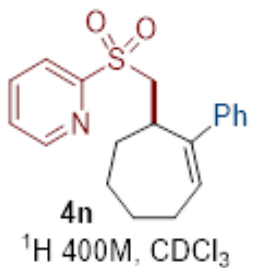

zwjiao-D825-H  
 zwjiao-D825-H  
 8.63  
 8.62  
 8.62

7.96  
 7.95  
 7.94  
 7.88  
 7.87  
 7.86  
 7.85  
 7.84  
 7.83

7.49  
 7.48  
 7.47  
 7.47  
 7.47  
 7.26  
 7.21  
 7.19  
 7.18  
 7.16  
 7.16  
 7.15  
 7.14  
 7.14  
 5.98  
 5.96  
 5.96  
 5.94  
 3.85  
 3.82  
 3.81  
 3.79  
 3.64  
 3.63  
 3.60  
 3.59  
 3.50  
 3.49  
 3.48  
 3.47

5.98  
 5.96  
 5.96  
 5.94  
 zwjiao-D825-H  
 zwjiao-D825-H

3.85  
 3.82  
 3.81  
 3.79  
 3.64  
 3.63  
 3.60  
 3.59  
 3.51  
 3.51  
 3.50  
 3.49  
 3.48  
 3.47

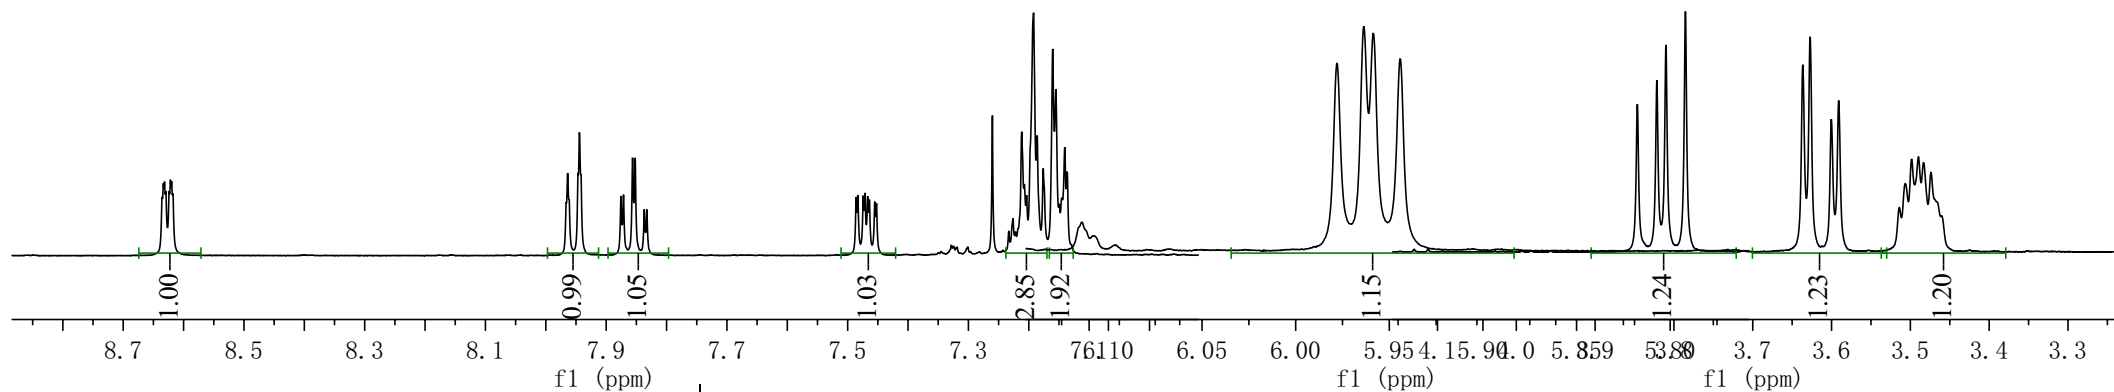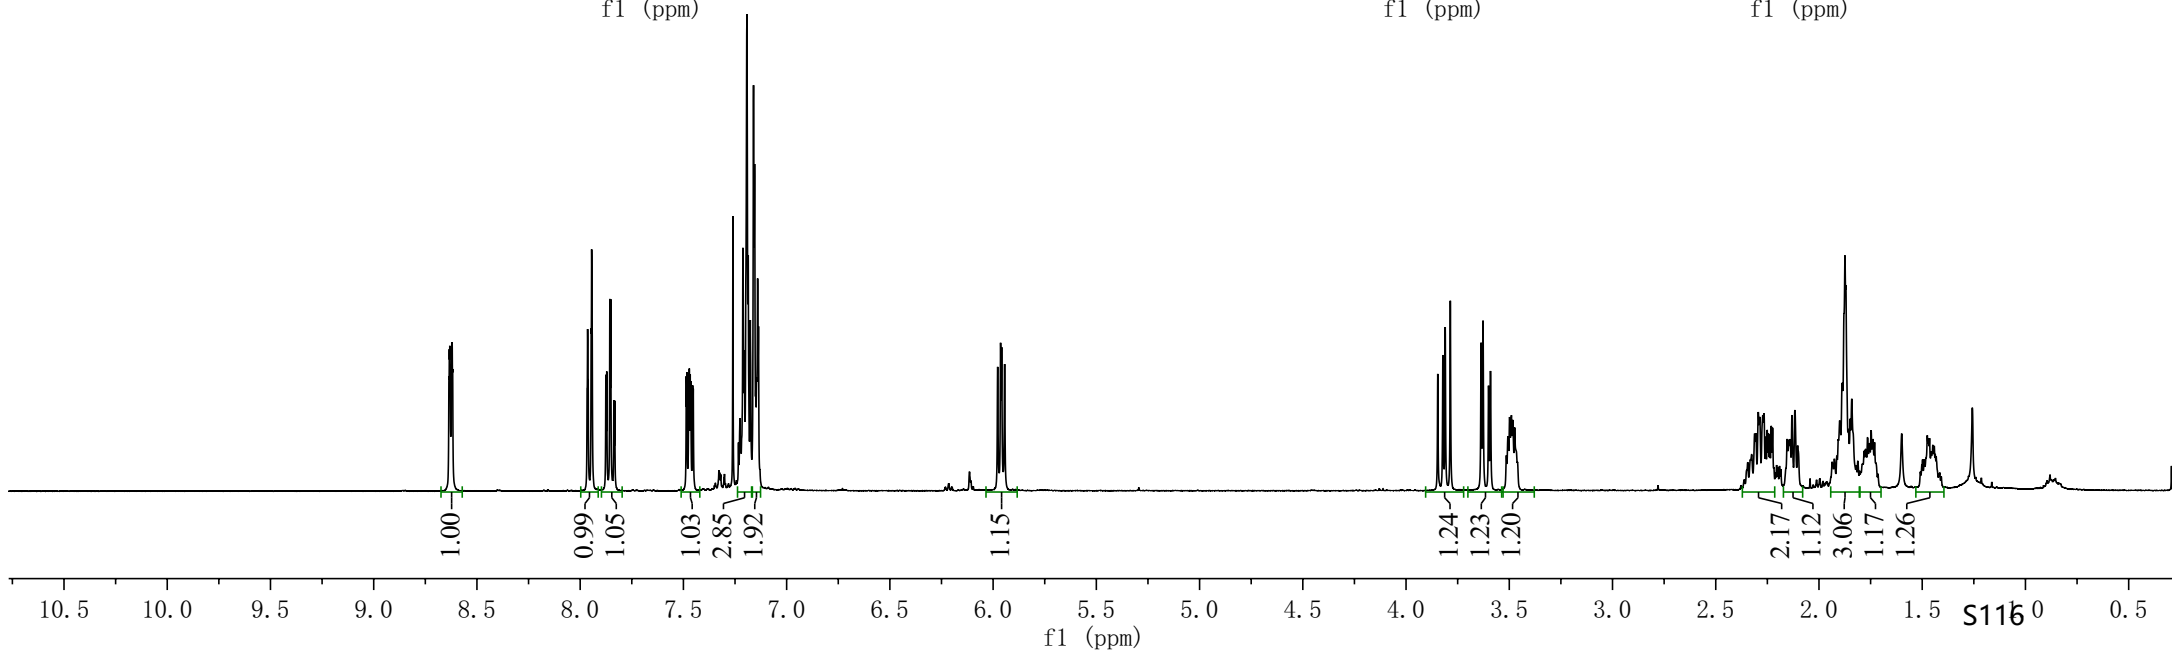

zwjiao-D825-C  
zwjiao-d825-C

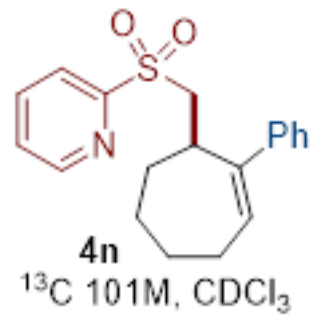

157.50  
150.24  
144.98  
143.69  
138.06  
132.37  
128.30  
127.31  
126.90  
126.44  
122.20

77.48  
77.16  
76.84

52.46

37.61  
29.68  
27.91  
26.93  
25.69

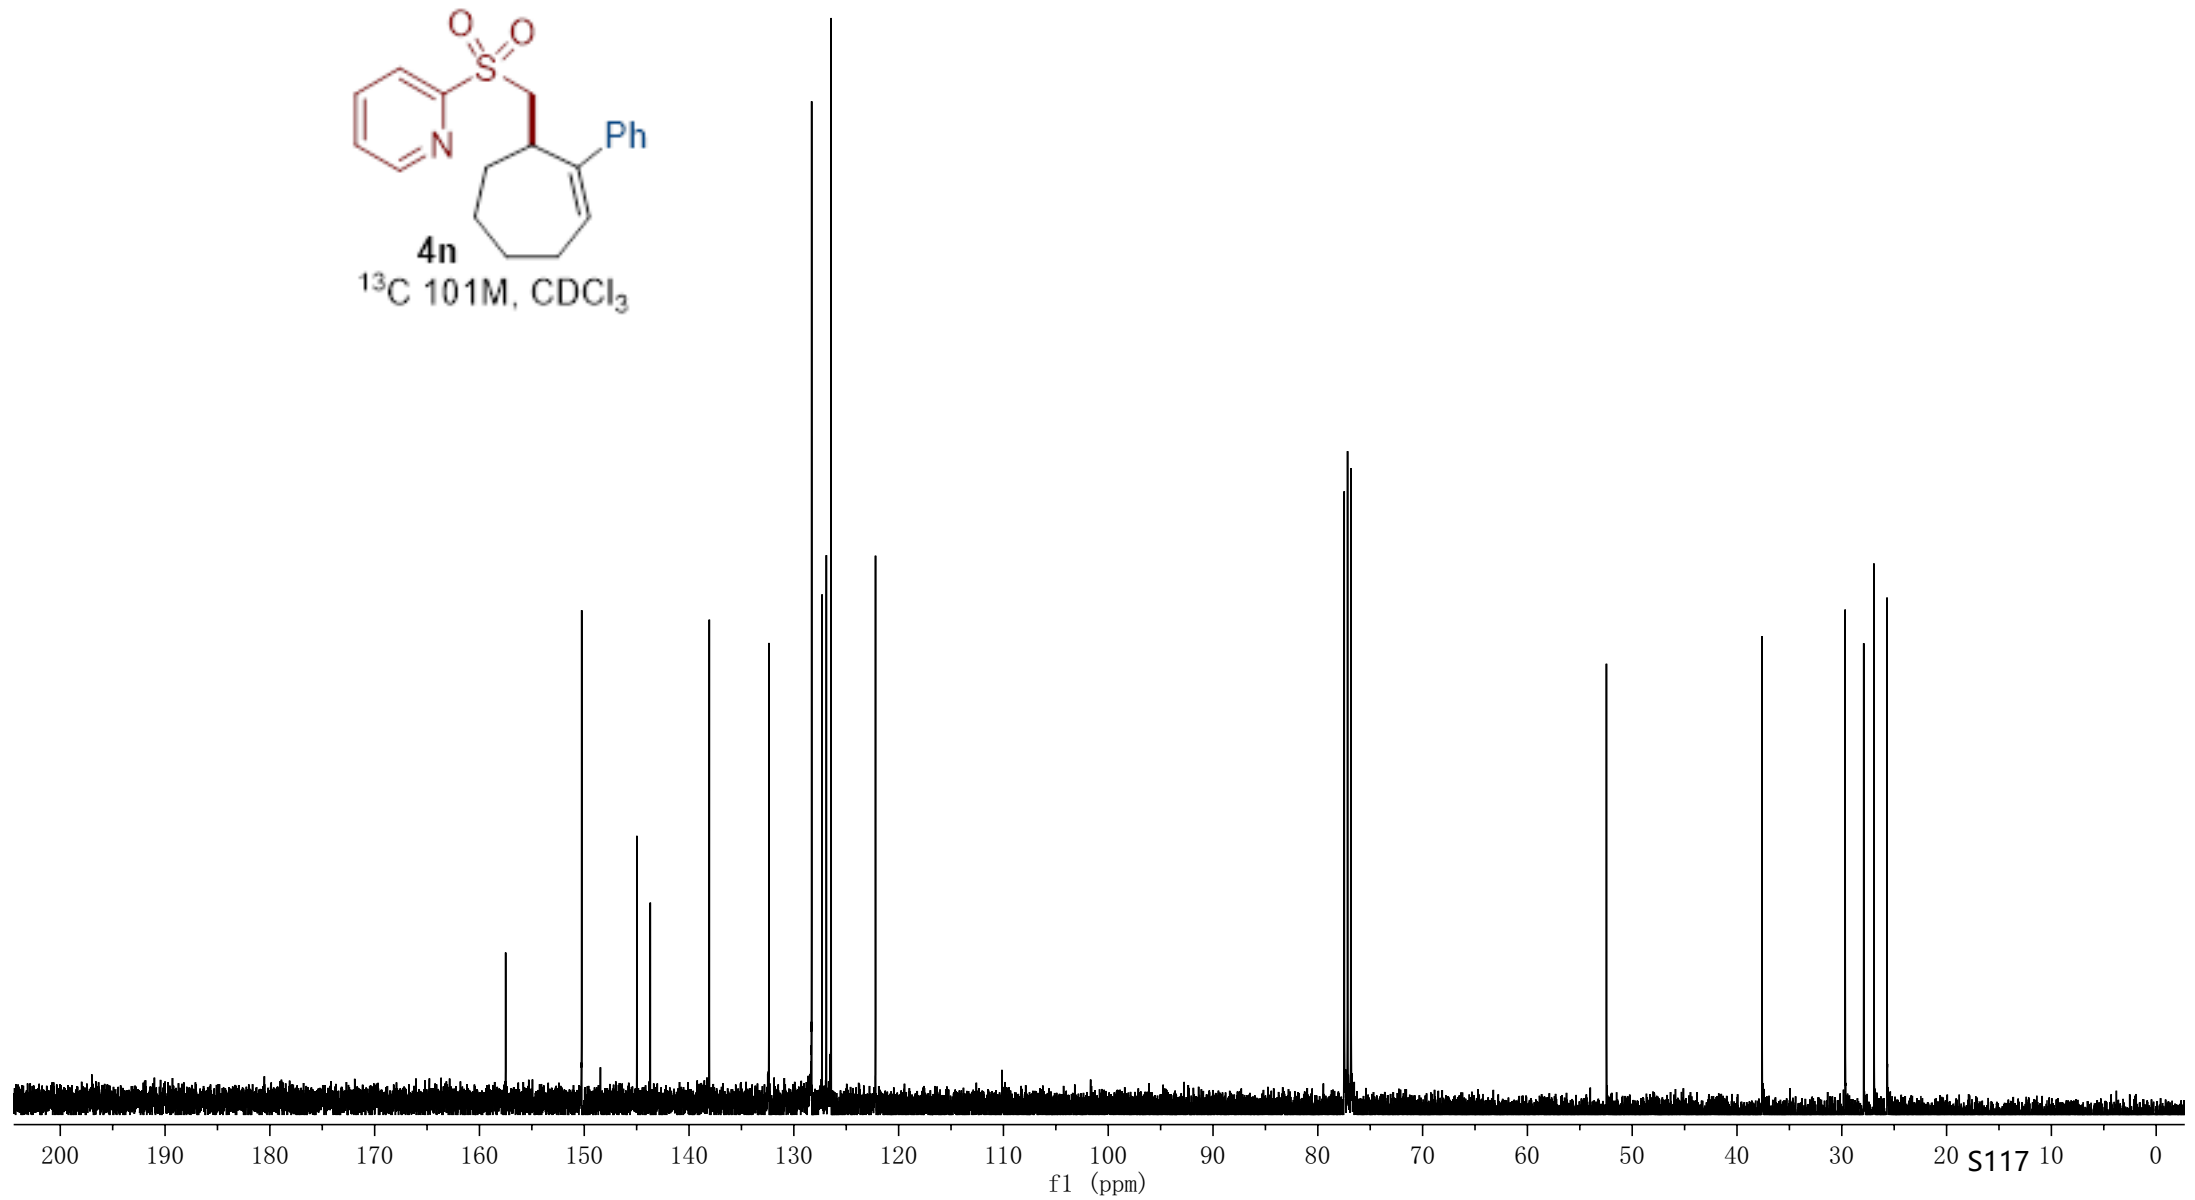



zwjiao-D821-C  
zwjiao-D821-C

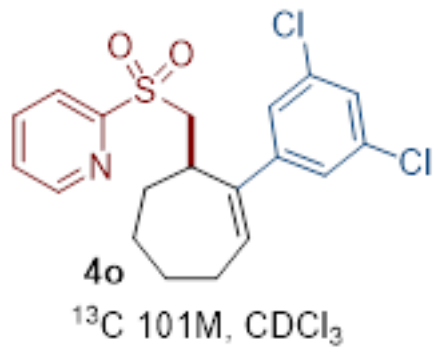

—157.03  
—150.31  
—146.87  
—143.03  
—138.09  
—134.74  
—134.67  
—127.54  
—126.84  
—125.08  
—122.24

—77.48  
—77.16  
—76.84

—52.28

—37.59  
—29.79  
—27.93  
—26.68  
—25.57

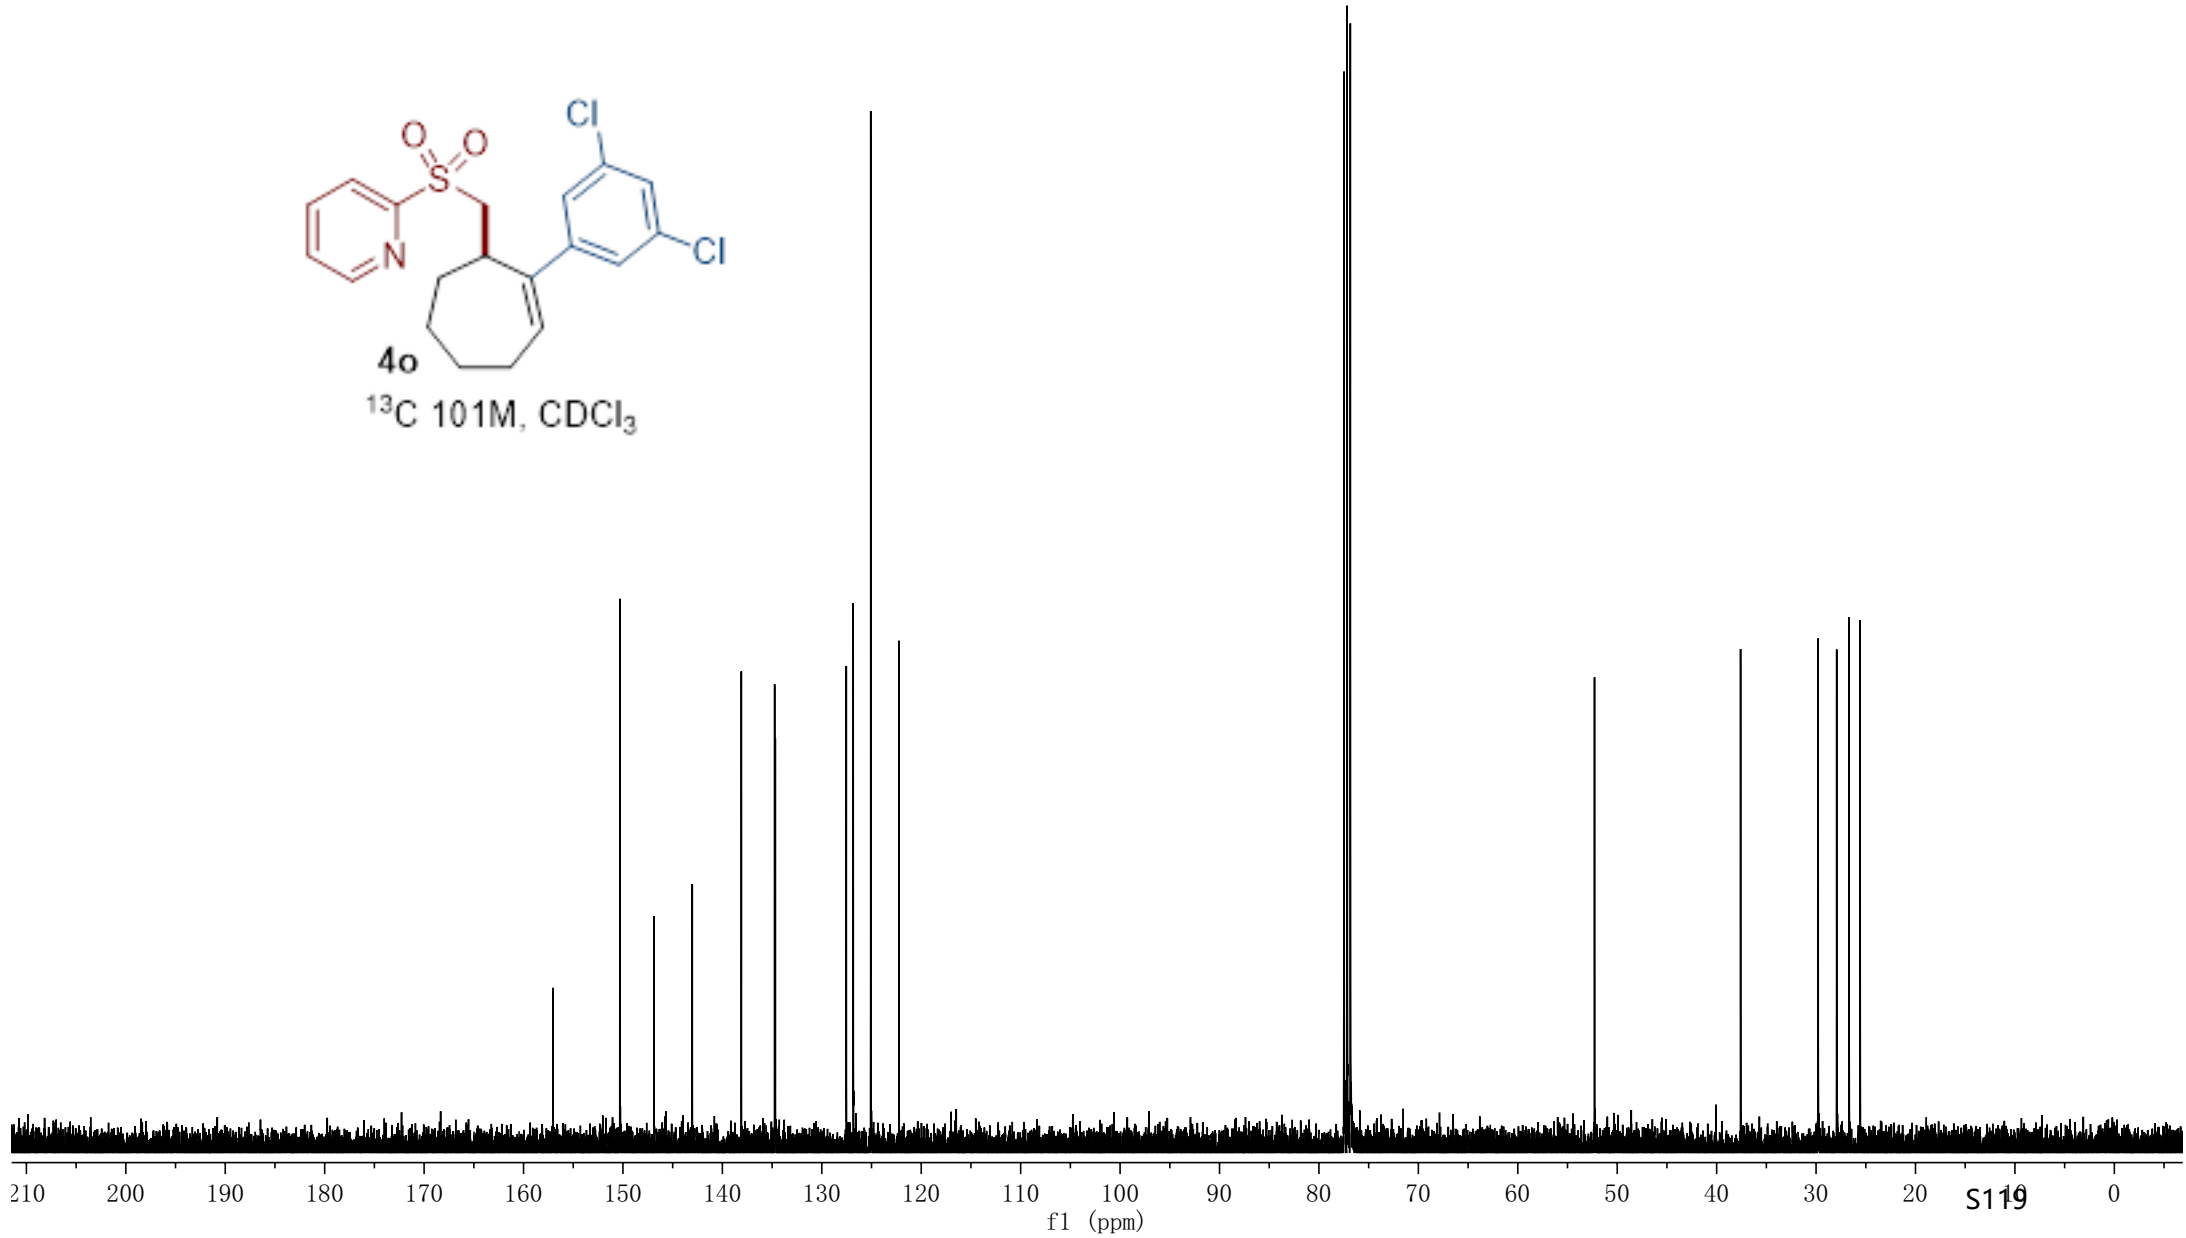

zwjiao-D897-H  
zwjiao-D897-H

7.31  
7.29  
7.26  
7.24  
7.23  
7.22  
7.21  
7.20  
7.19

5.89  
5.88  
5.87

2.83  
2.83  
2.17  
2.16  
2.15  
1.88  
1.64  
1.63  
1.61  
1.61  
1.57  
1.55  
1.55  
0.93

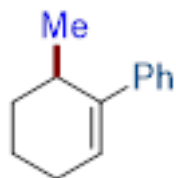

5a

$^1\text{H}$  400M,  $\text{CDCl}_3$

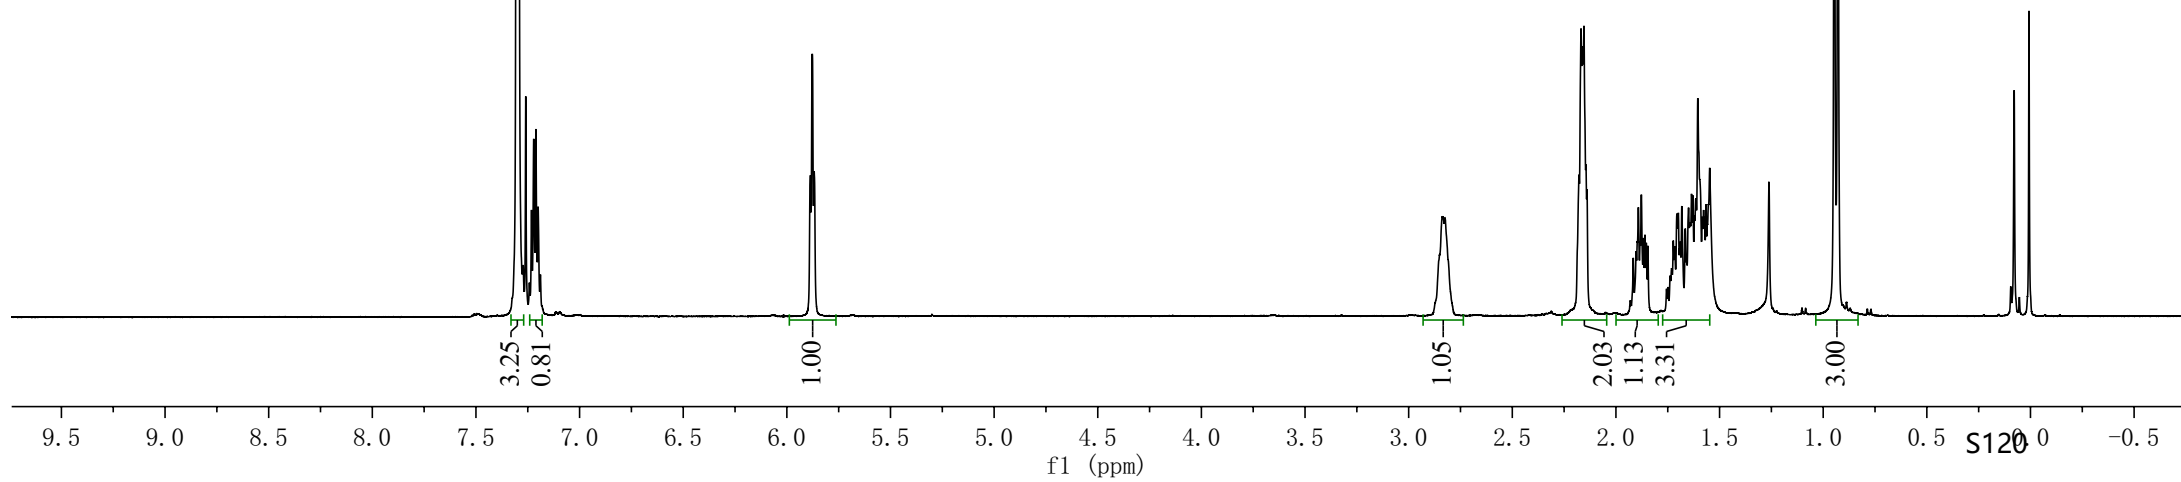



zwjiao-D897-C  
zwjiao-D897-C

143.06  
142.89

128.24  
126.49  
126.37  
125.60

77.48  
77.16  
76.84

31.20  
30.58  
26.38  
20.34  
19.02

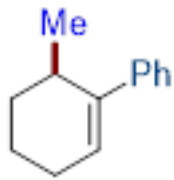

5a

$^{13}\text{C}$  101M,  $\text{CDCl}_3$

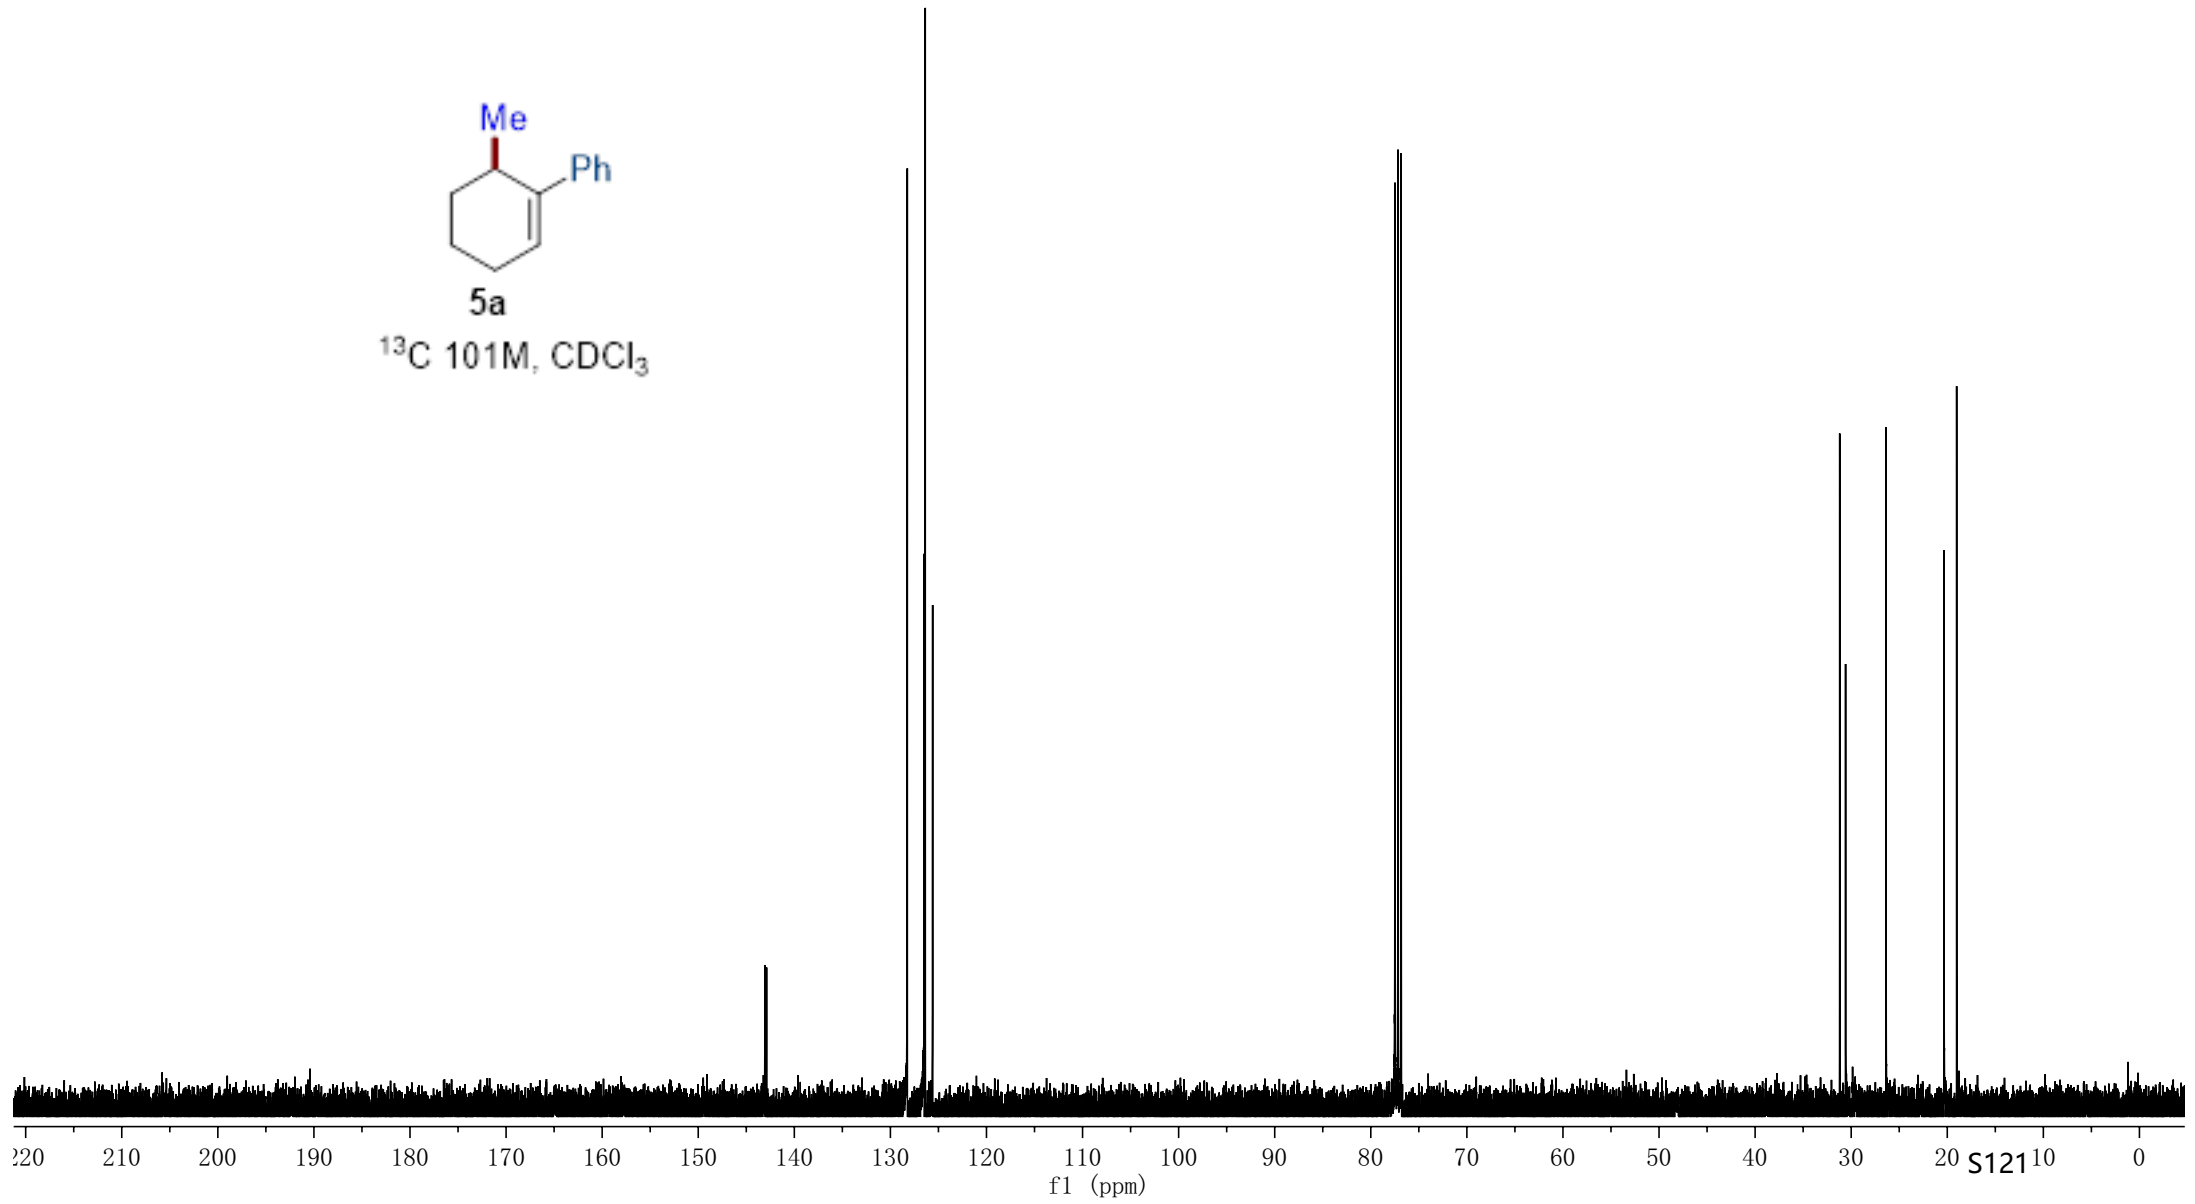

S12110

zwjiao-D895-H  
zwjiao-D895-H

7.32  
7.31  
7.30  
7.28  
7.26  
7.24  
7.24  
7.23  
7.22  
7.21  
7.21

5.98  
5.97  
5.96

3.59  
3.26  
2.38  
2.38  
2.35  
2.34  
2.20  
2.19  
2.18  
2.17  
2.16  
1.88  
1.86  
1.85  
1.84  
1.70  
1.69  
1.67  
1.66  
1.64  
1.63  
1.61

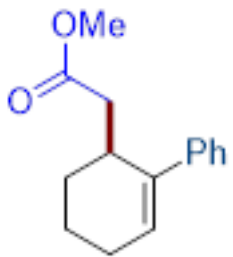

**5b**  
<sup>1</sup>H 400M, CDCl<sub>3</sub>

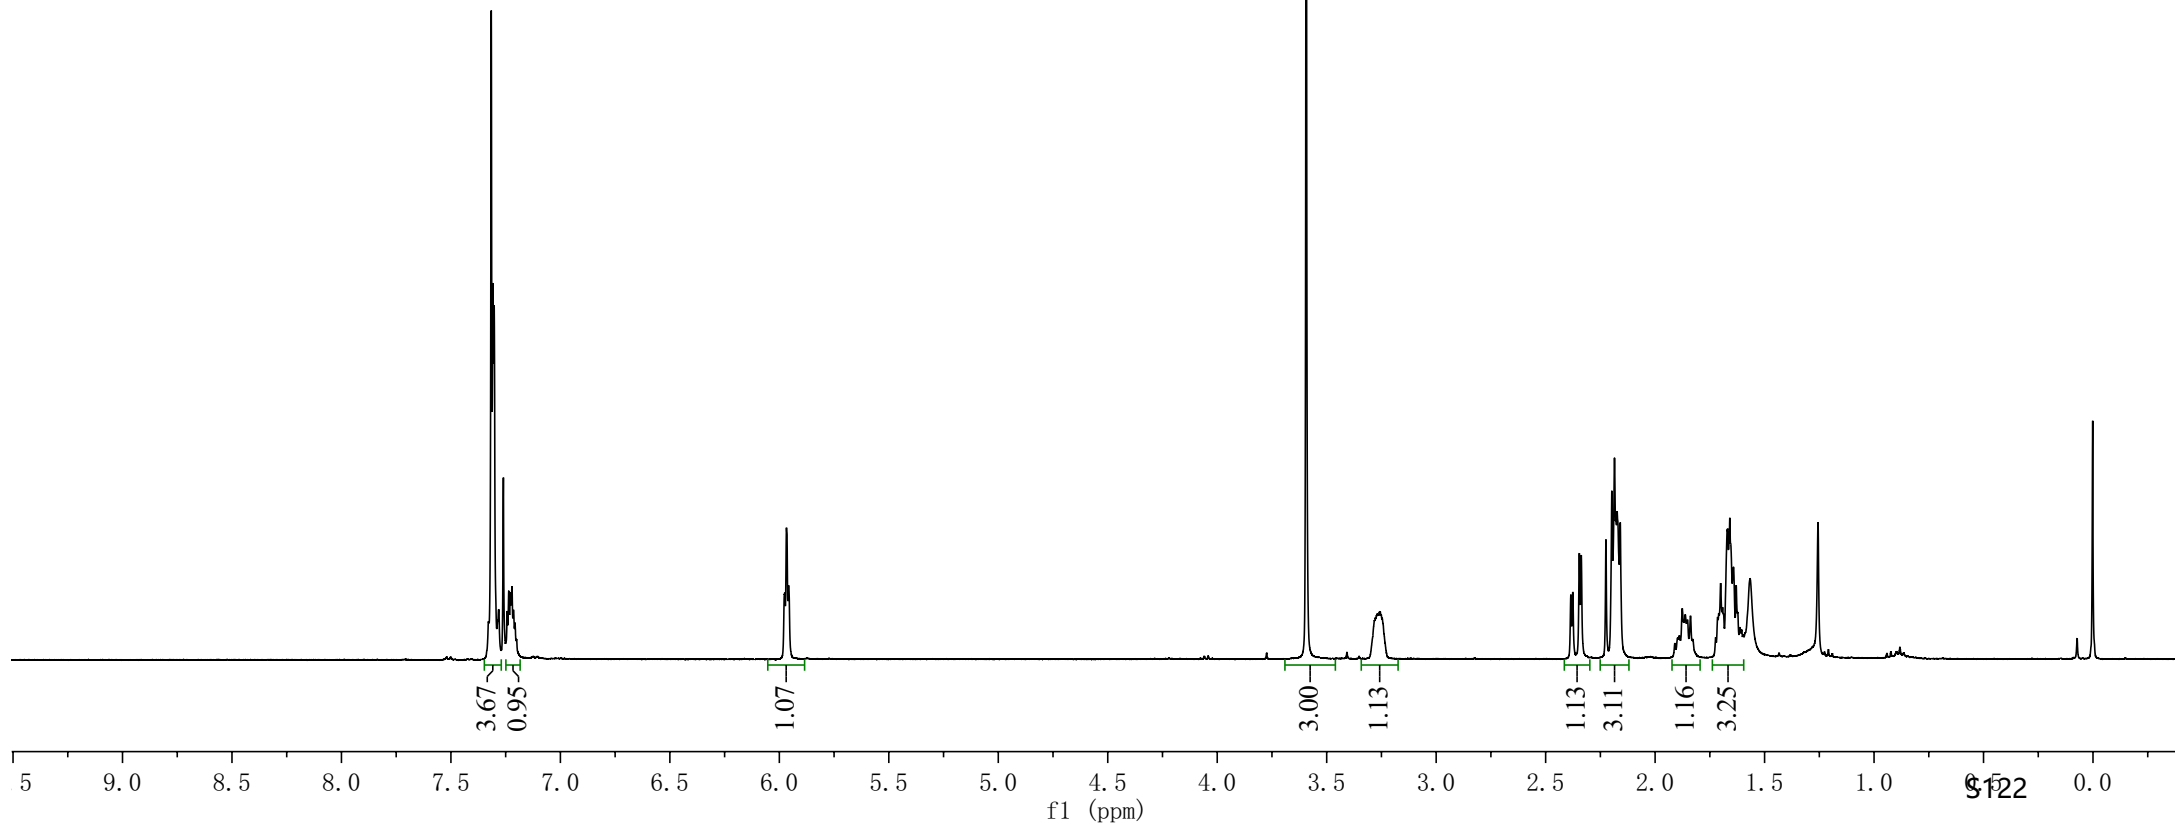

zwjiao-D895-C  
zwjiao-D895-C

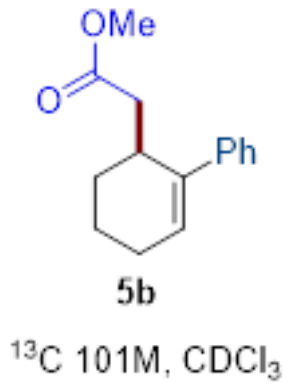

—173.68

∩141.75  
∩140.30

∩128.48  
∩127.47  
∩126.95  
∩126.42

∩77.48  
∩77.16  
∩76.84

—51.58

∩38.44  
∩32.77  
∩27.89  
∩26.15

—18.41

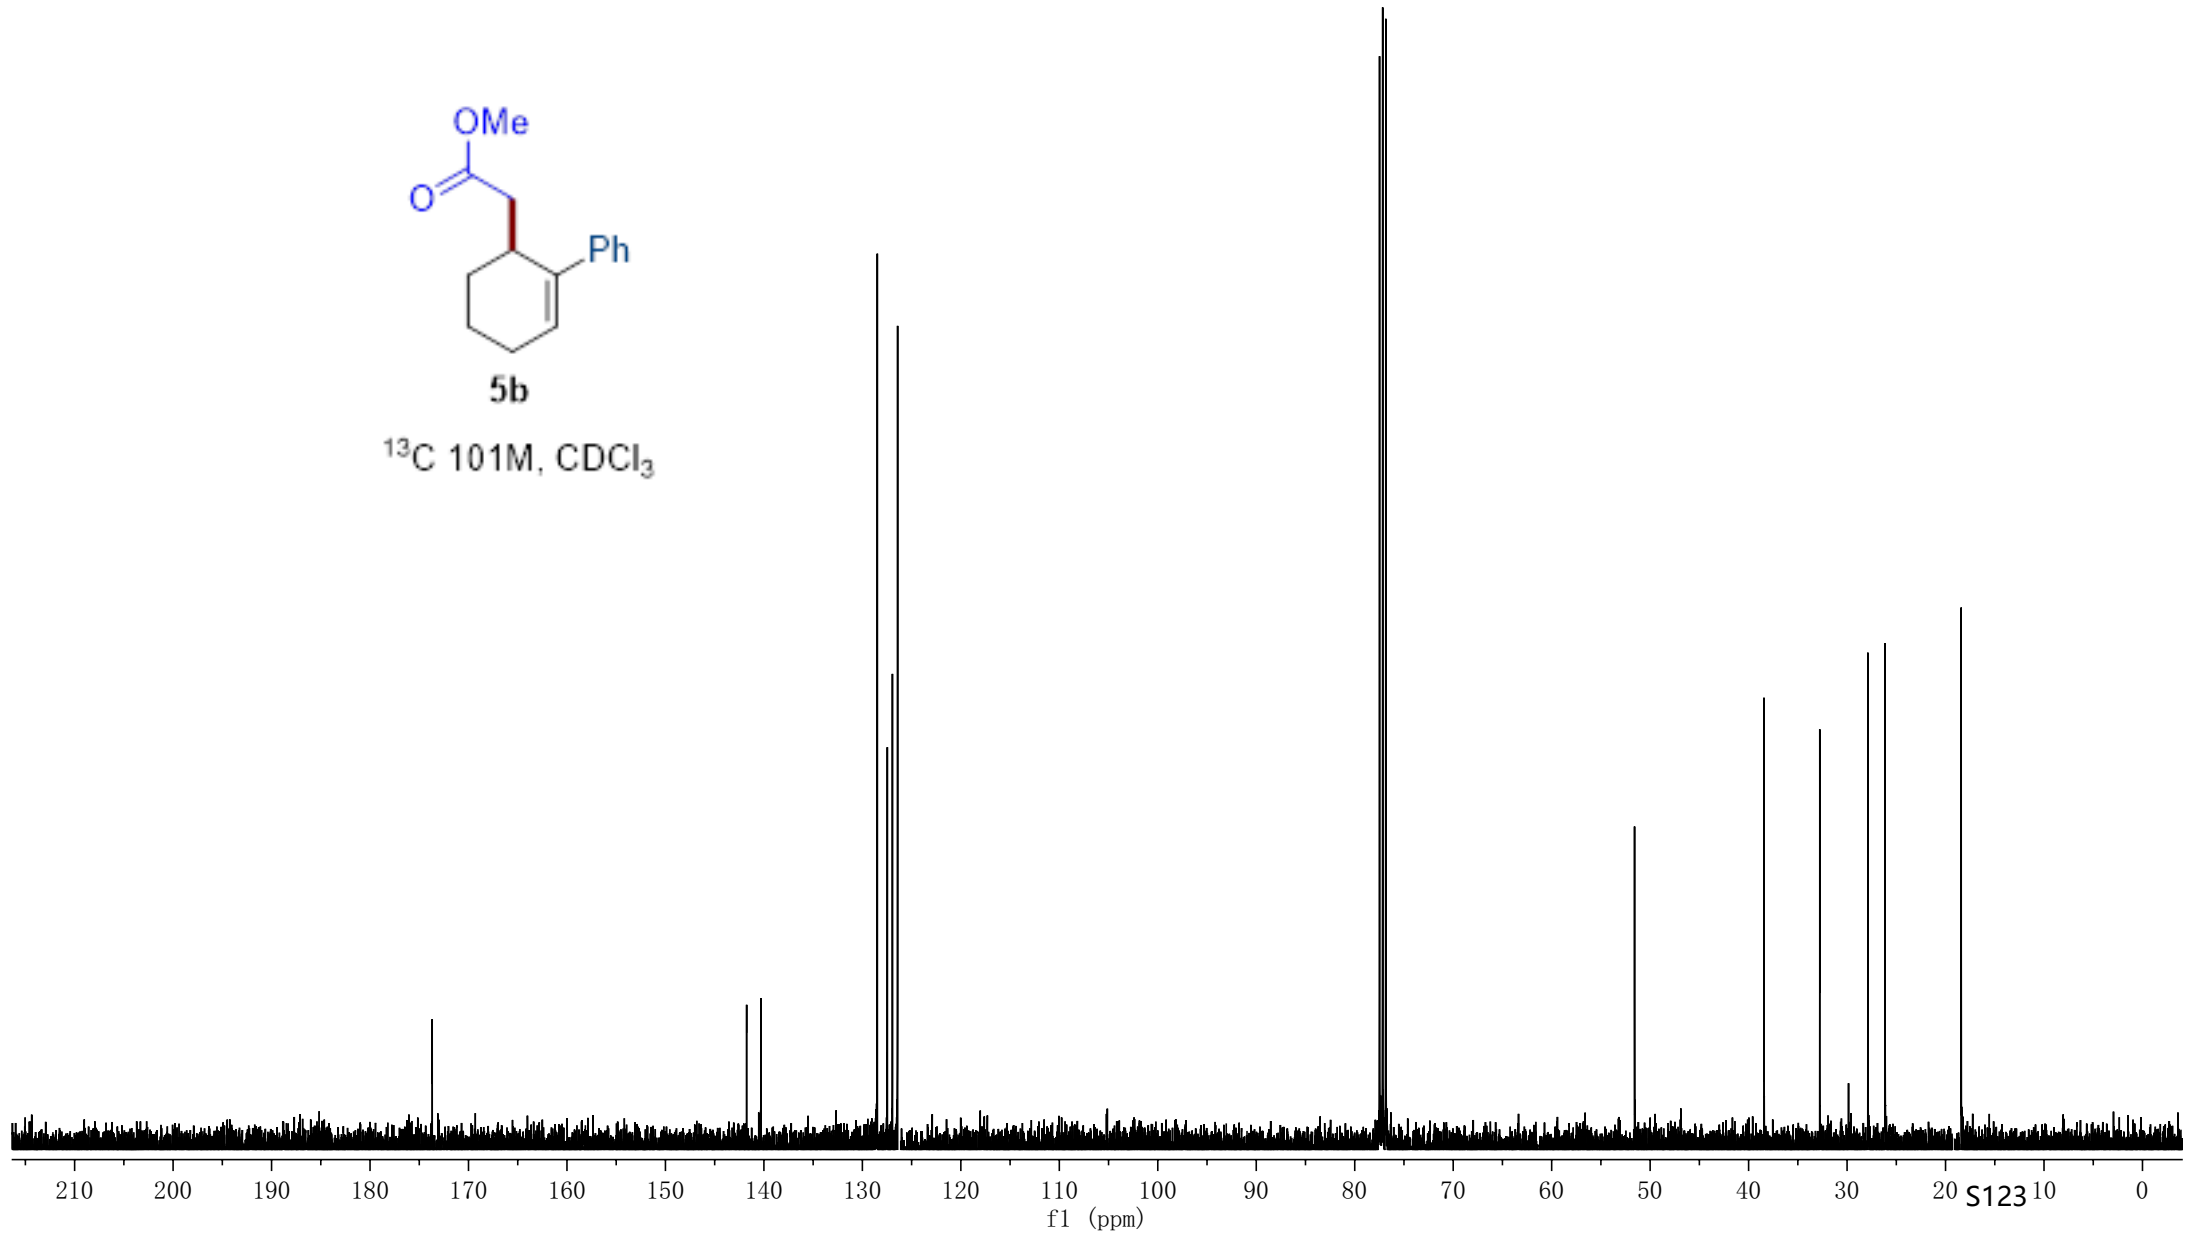

S123

zwjiao-D896-H  
zwjiao-D896-H

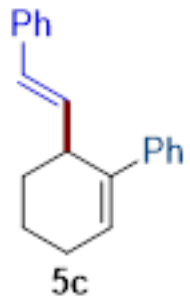

$^1\text{H}$  400M,  $\text{CDCl}_3$

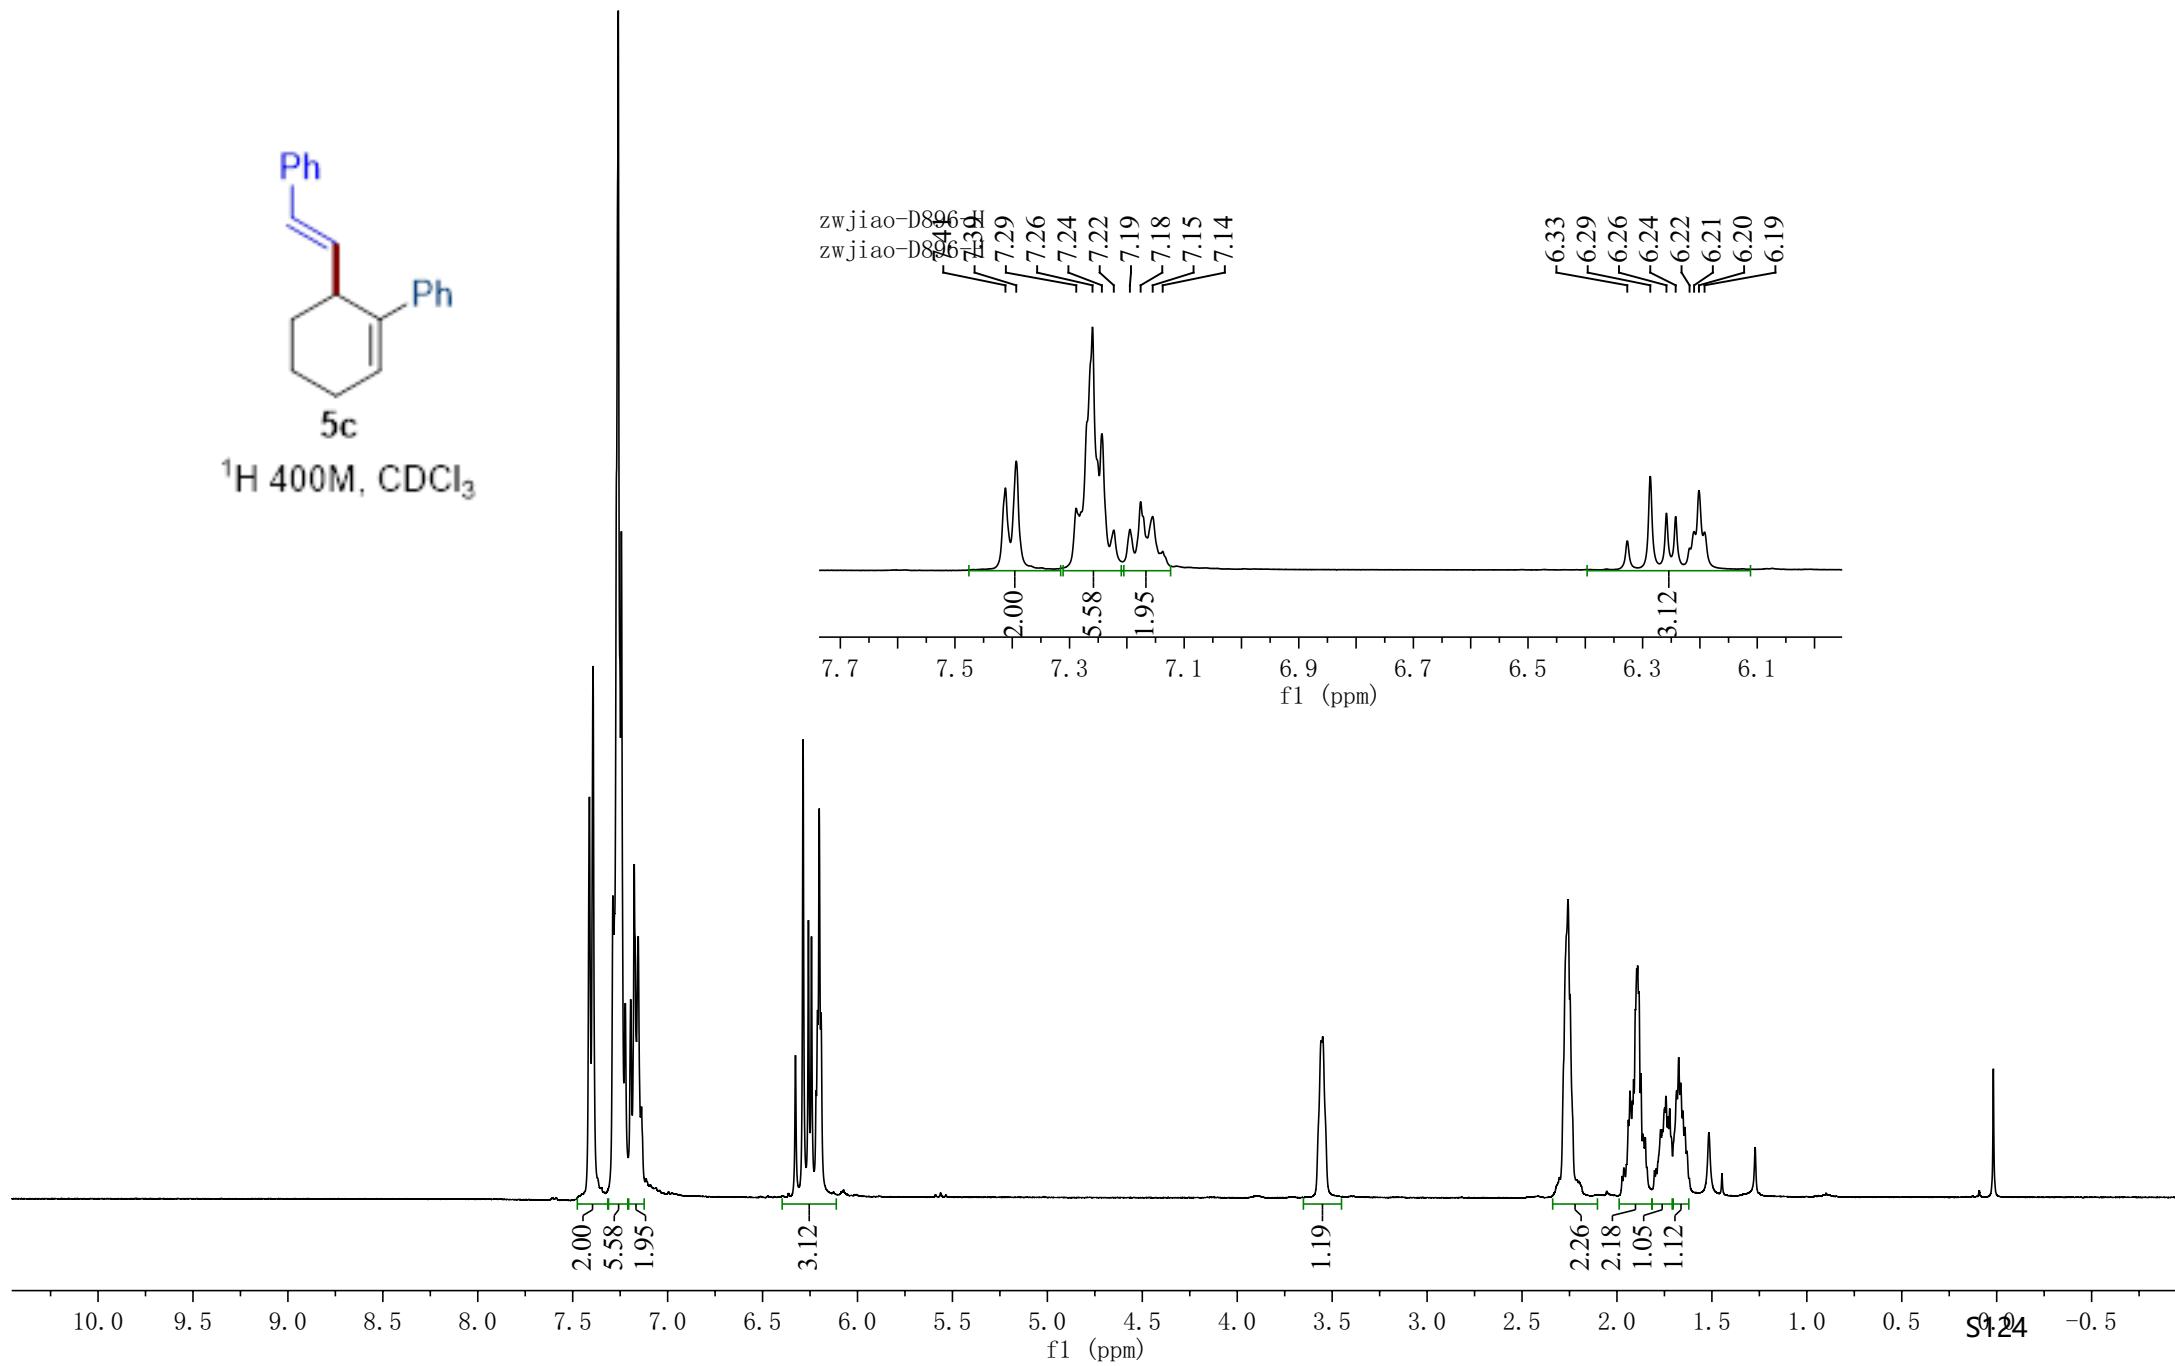

zwjiao-D896-C  
zwjiao-D896-C

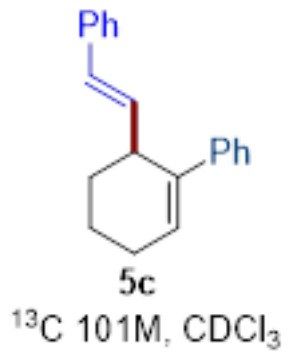

142.22  
138.61  
137.88  
133.76  
130.95  
128.50  
128.25  
127.09  
126.97  
126.60  
126.18  
126.12

77.48  
77.16  
76.84

39.47

29.68

26.19

18.10

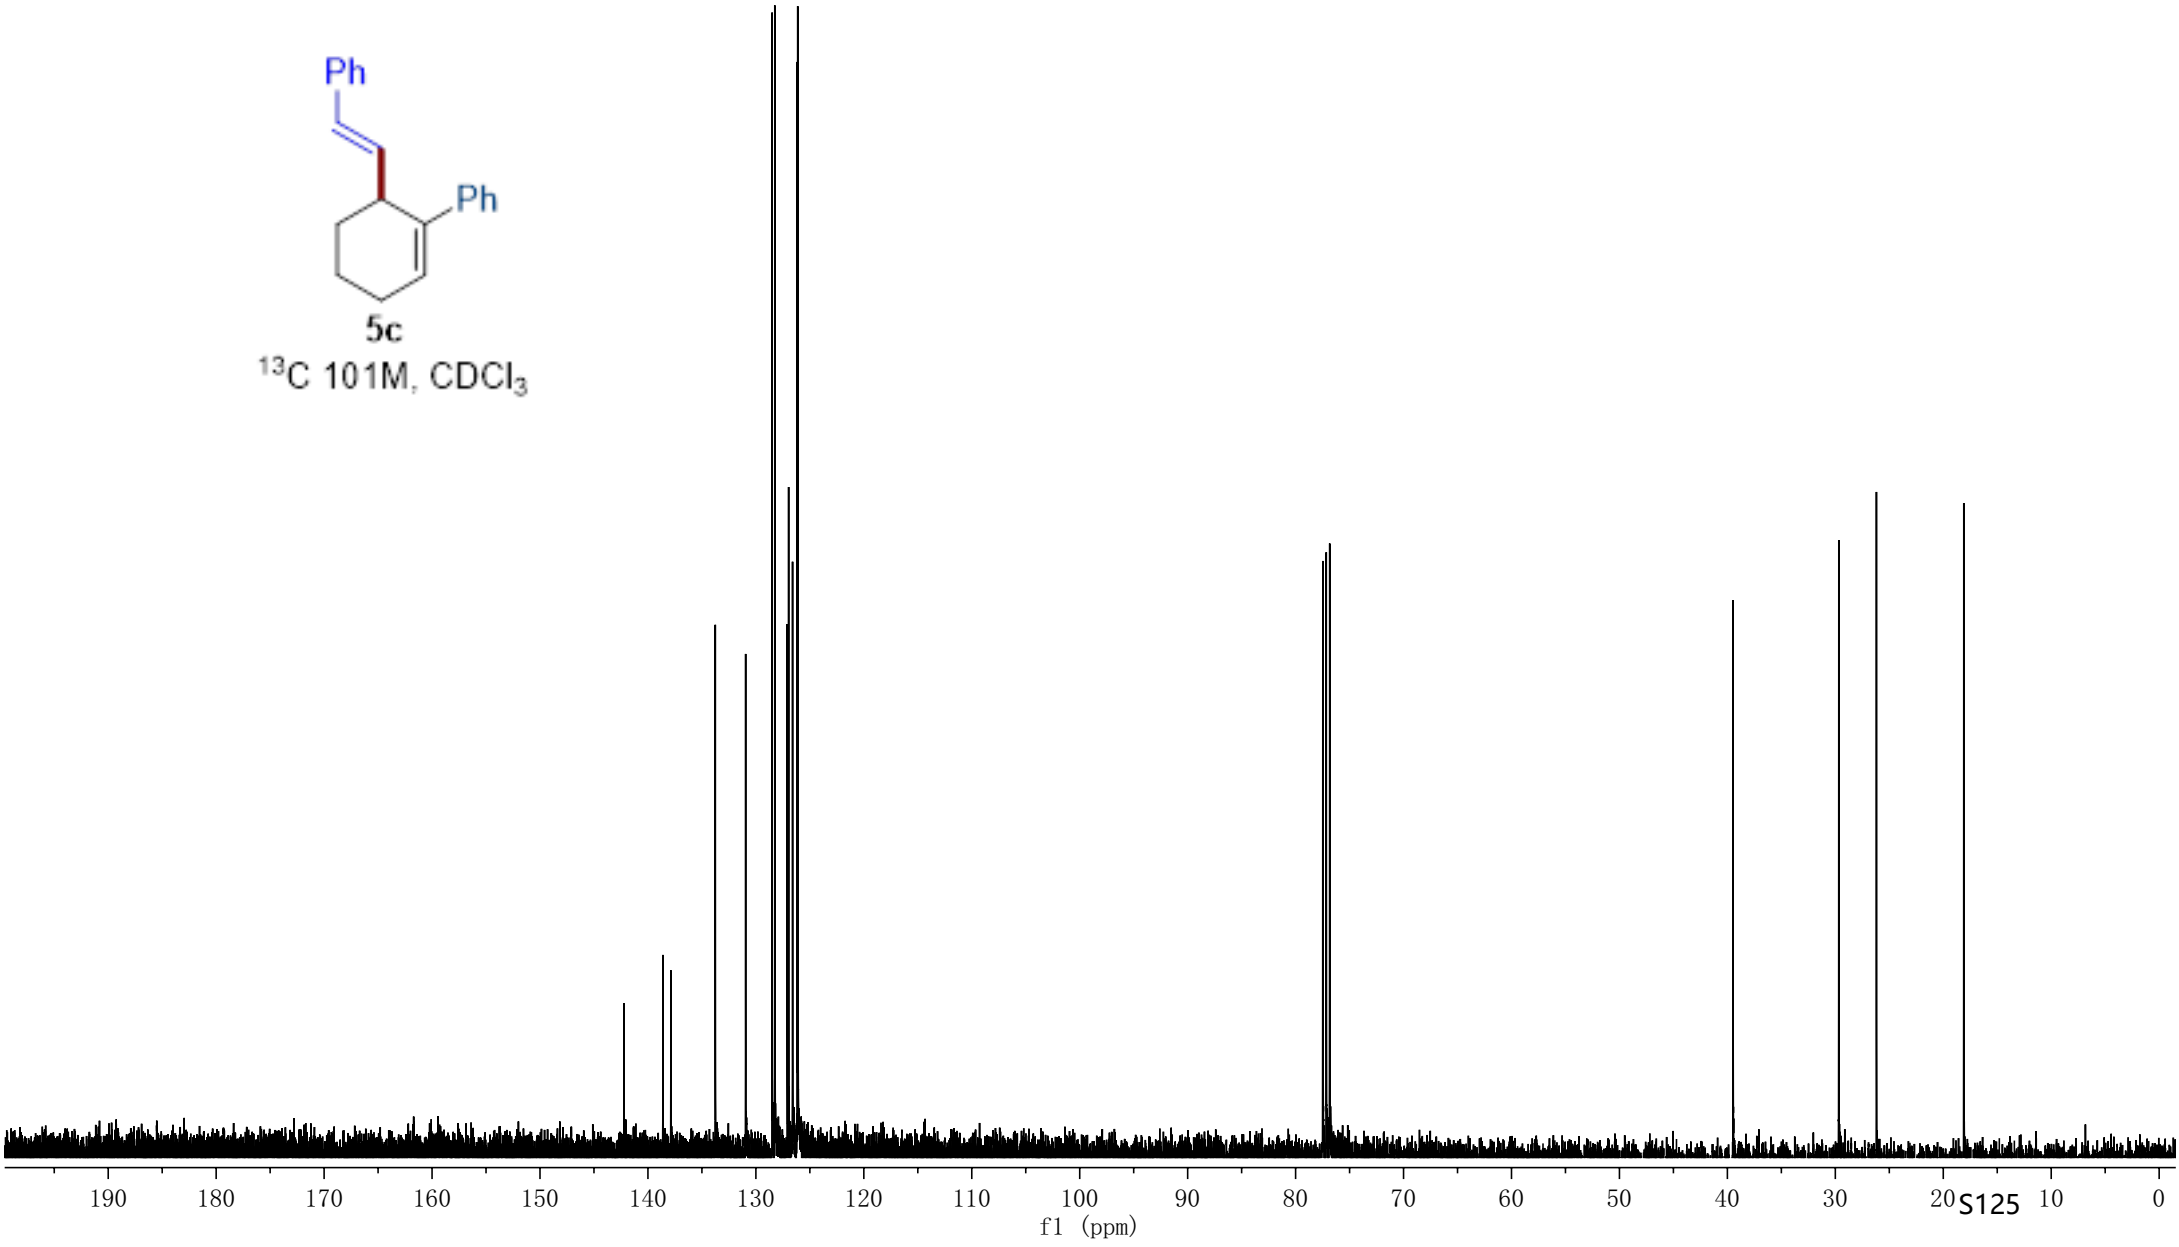

f1 (ppm)

S125

zwjiao-D893-H  
zwjiao-D893-H

8.72  
8.70  
8.03  
8.01  
7.96  
7.94  
7.94  
7.54  
7.53  
7.52  
7.30  
7.28  
7.26  
7.24  
7.22  
7.20

5.39

3.72  
3.33  
3.31  
3.27  
3.25  
3.23  
2.95  
2.94  
2.92  
2.90  
2.90  
2.88  
2.86  
2.84  
2.02  
2.02  
1.99  
1.98  
1.83  
1.83  
1.39  
1.37  
1.35  
1.33  
1.31  
1.27

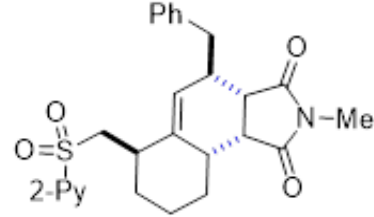

zwjiao-D893-H  
zwjiao-D893-H

8.06  
8.04  
8.03  
8.01  
7.96  
7.94  
7.92  
7.55  
7.54  
7.53  
7.52  
7.30  
7.28  
7.26  
7.24  
7.22  
7.20

zwjiao-D893-H  
zwjiao-D893-H

3.37  
3.34  
3.33  
3.31  
3.29  
3.27  
3.25  
3.23  
3.21

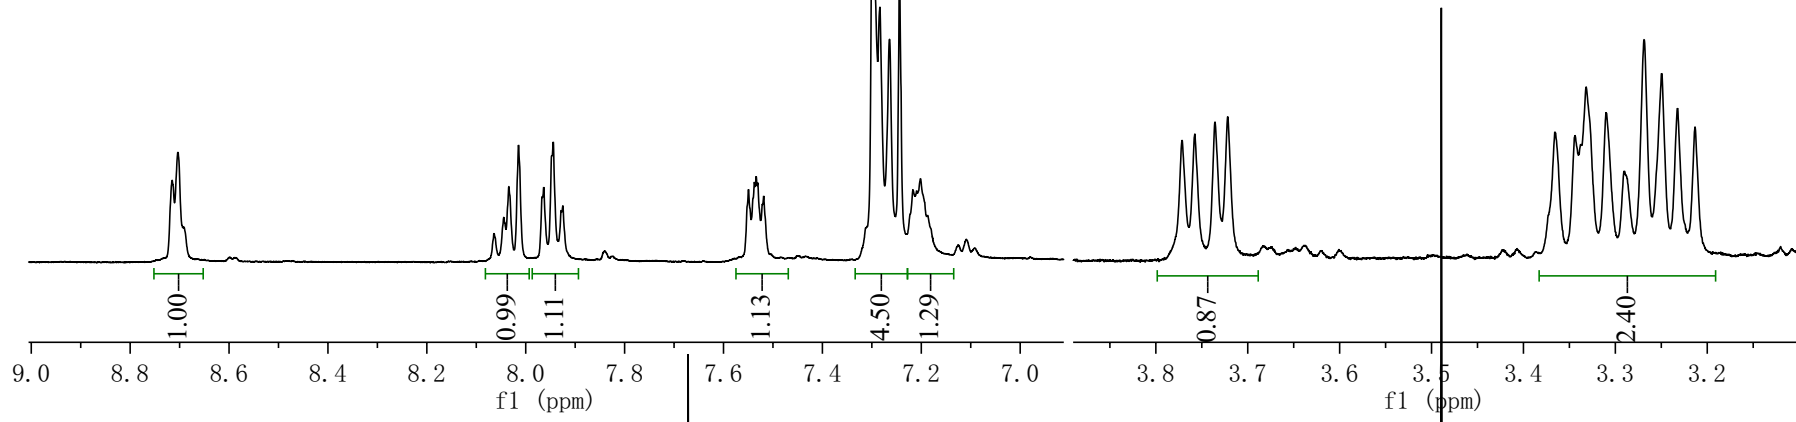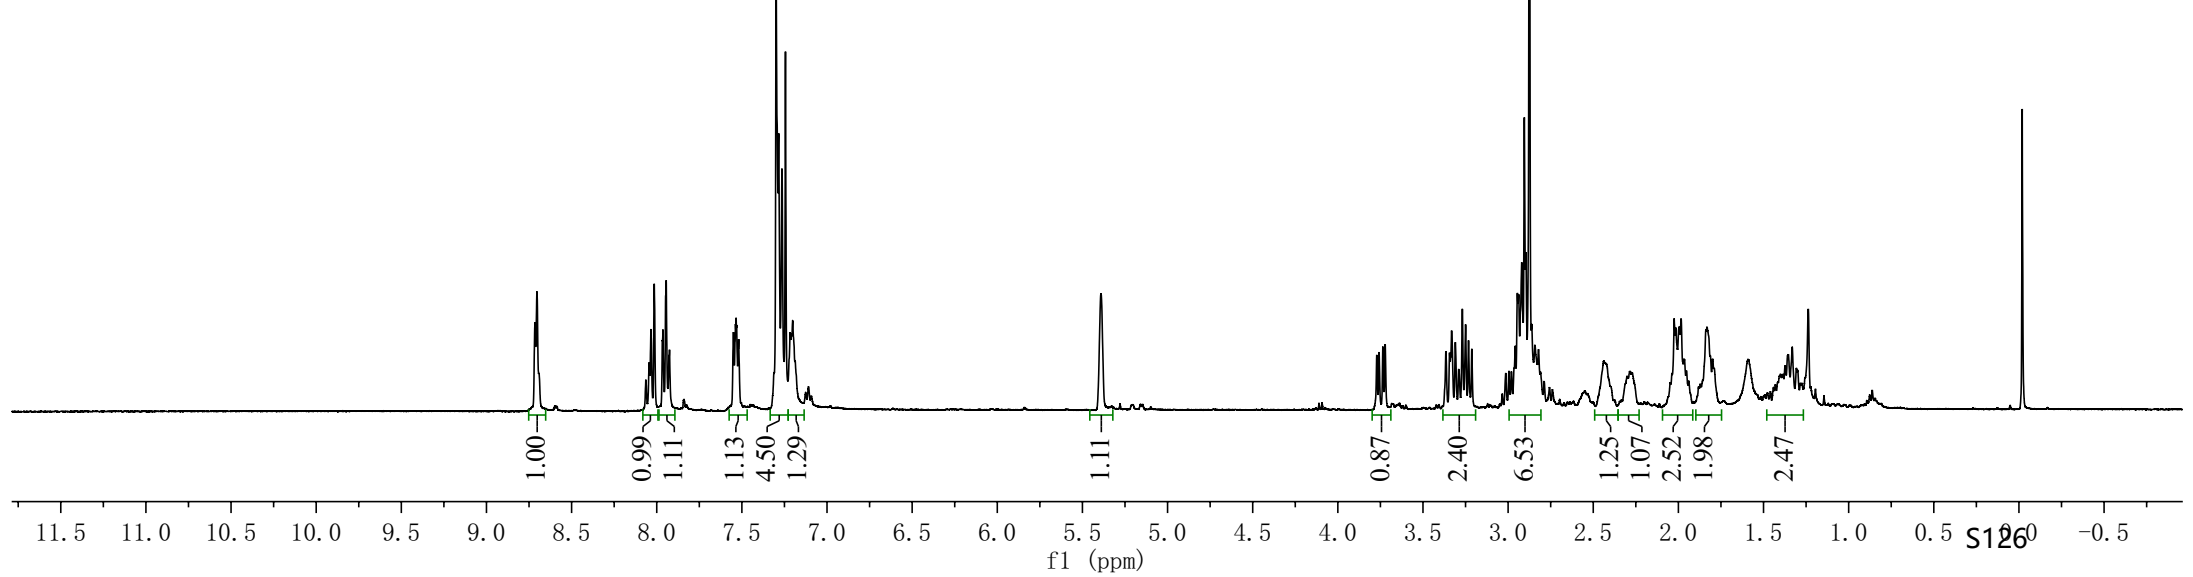

zwjiao-D893-C  
zwjiao-D893-C

177.86  
177.41

158.13  
150.24

142.29  
140.31  
138.41  
129.34  
129.30  
128.59  
127.46  
126.41  
123.56  
121.91

77.48  
77.16  
76.84

53.62

44.03  
42.65  
38.71  
37.33  
36.98  
32.35  
27.98  
24.73  
23.52  
20.58

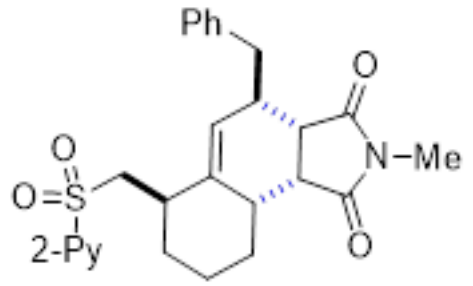

5d *dr* = 3.5:1  
<sup>13</sup>C 101M, CDCl<sub>3</sub>

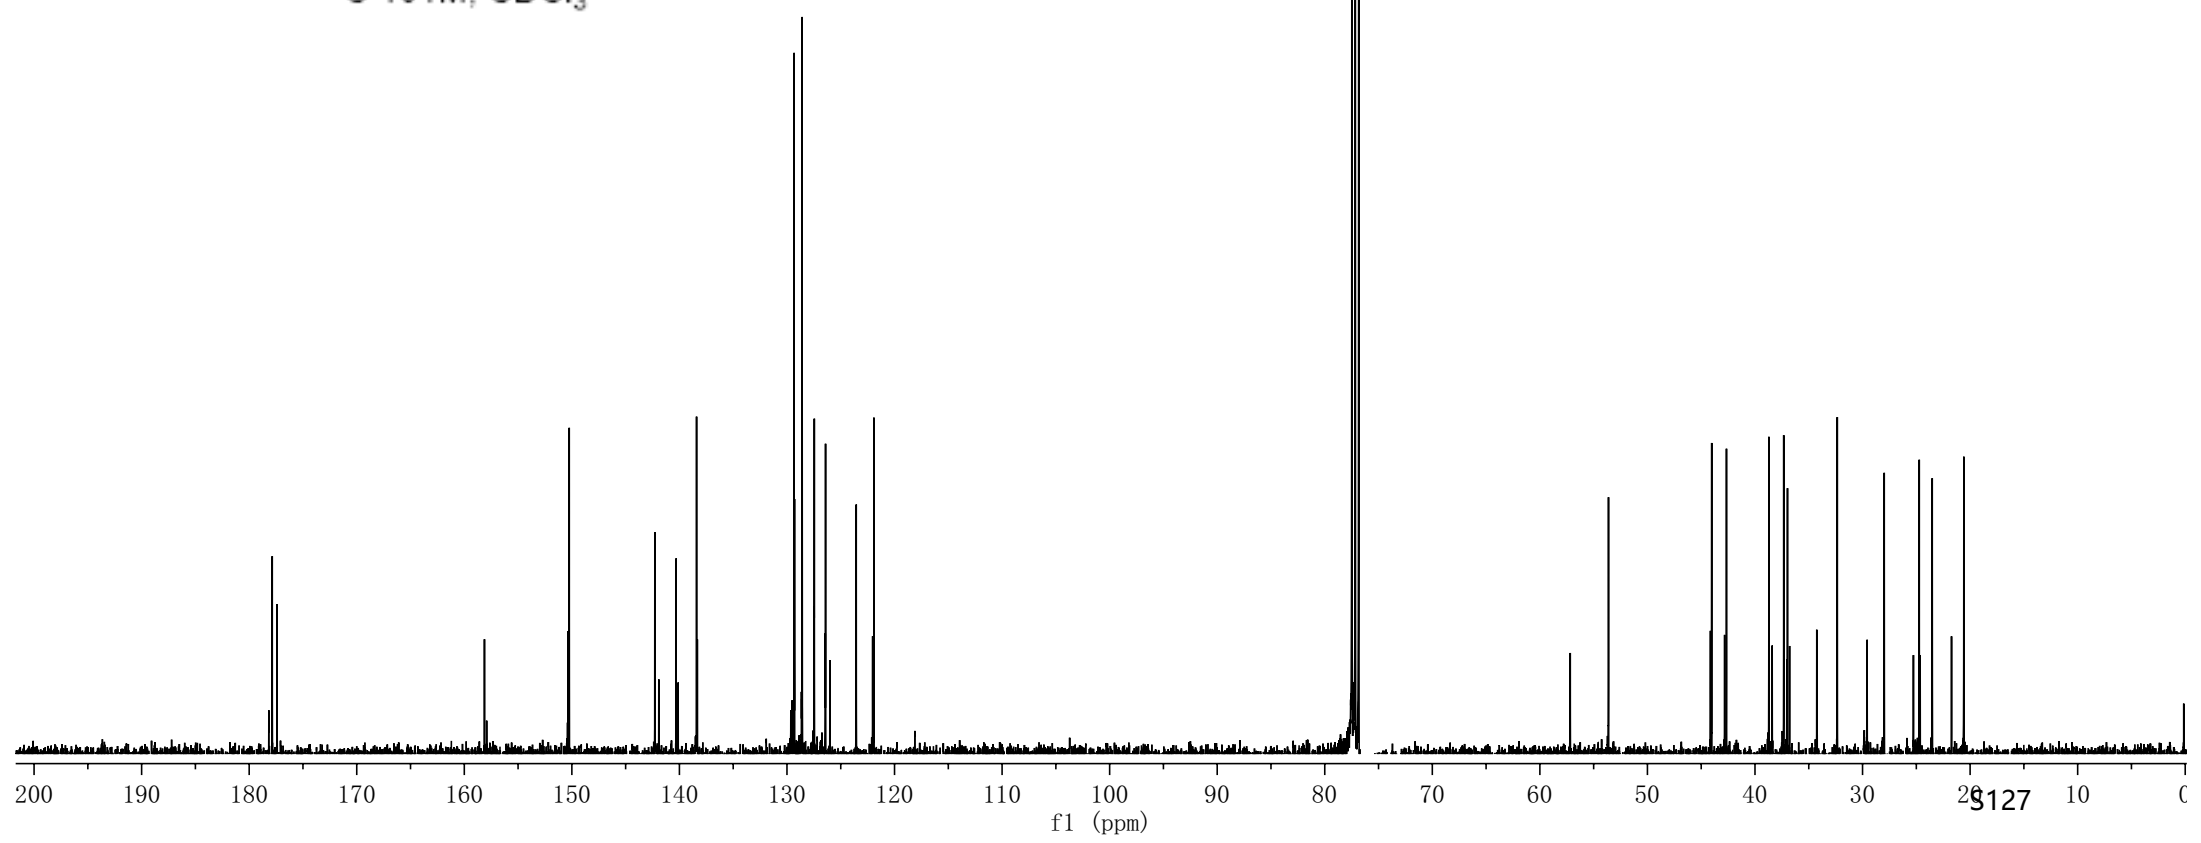

zwjiao-D836-H  
zwjiao-D836-H

7.83  
7.80  
7.26  
6.98  
6.96

3.85

2.76

0.25

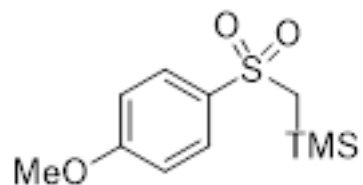

**1b**

<sup>1</sup>H 400M, CDCl<sub>3</sub>

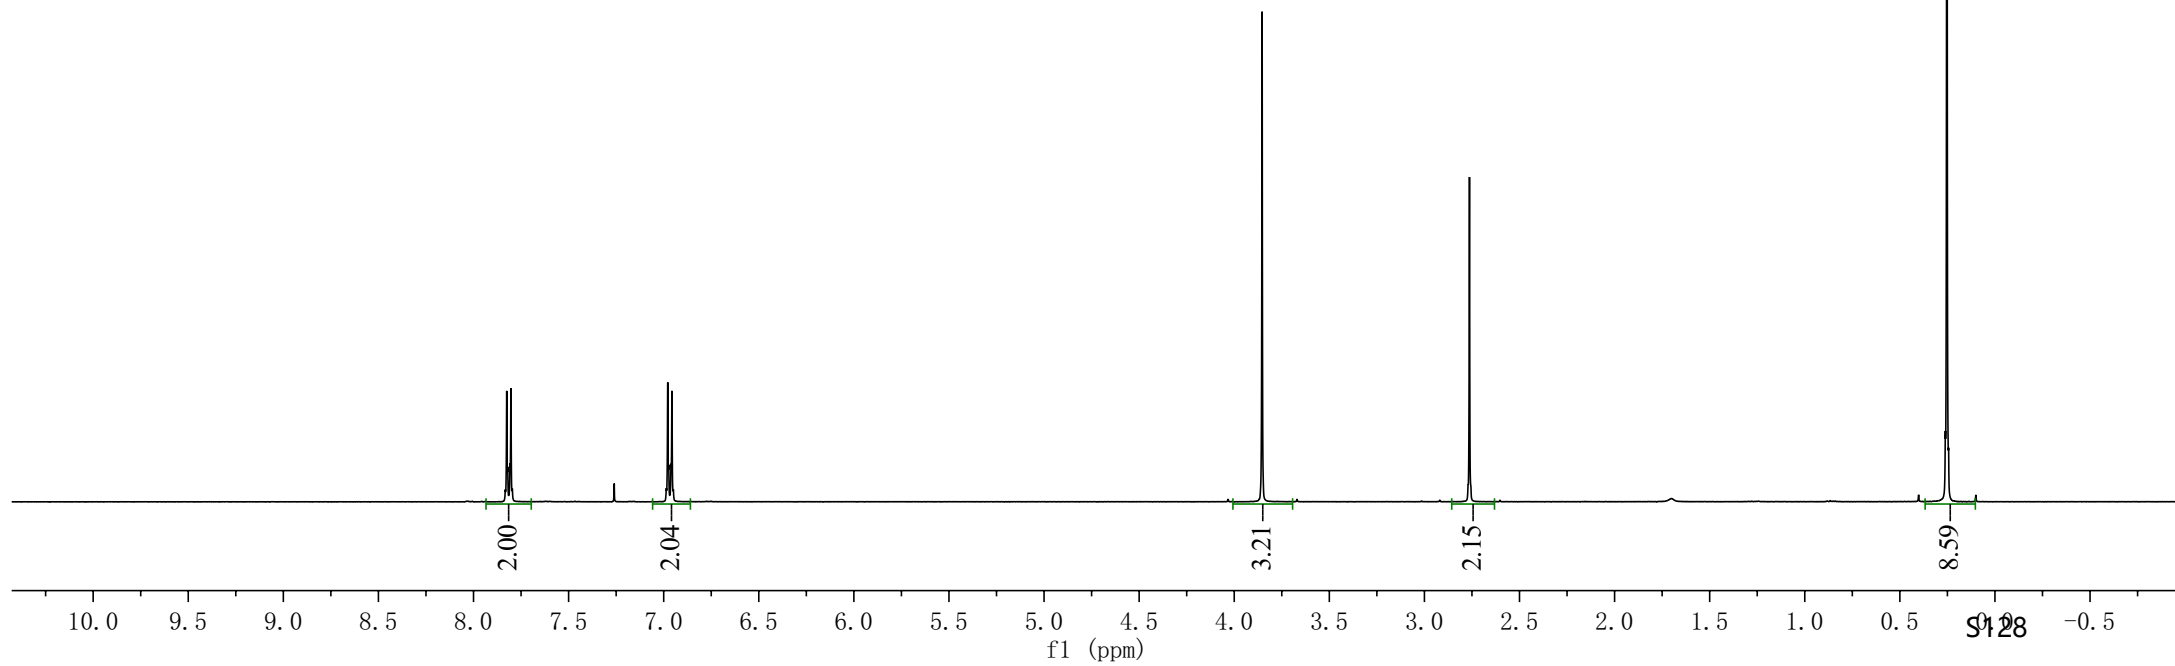



zwjiao-D836-C  
zwjiao-D836-C

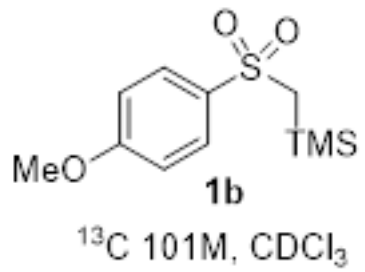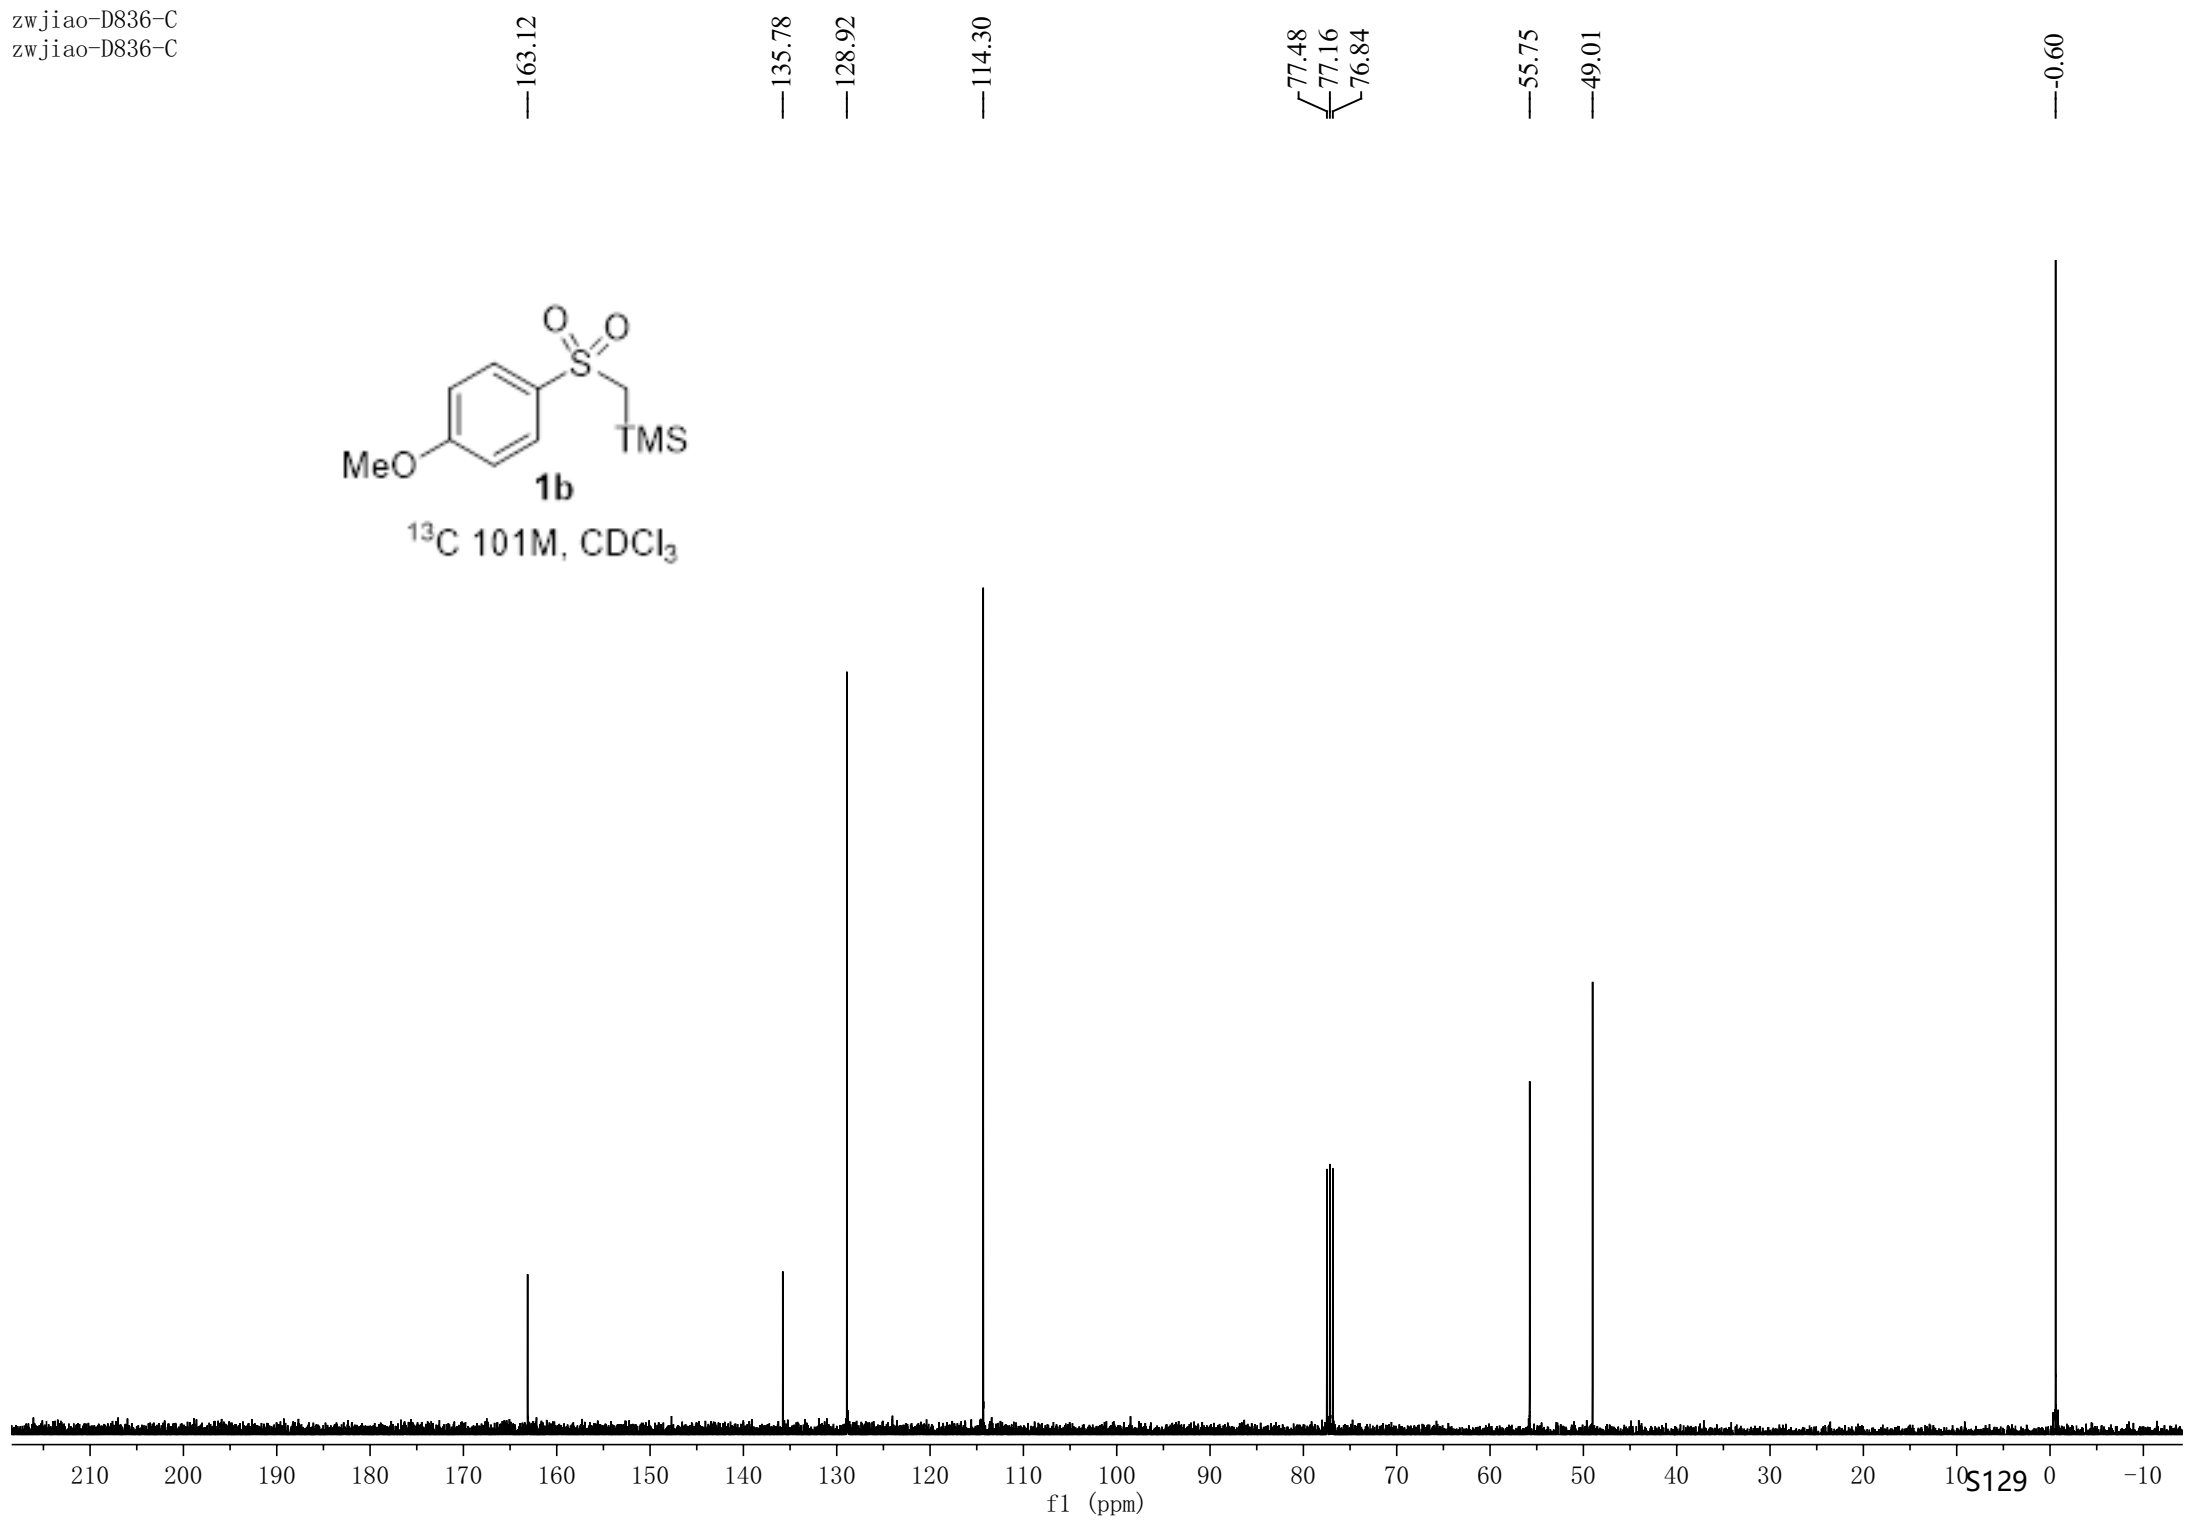

zwjiao-D839-H  
zwjiao-D839-H

8.38  
8.35  
8.11  
8.09

7.26

2.80

0.32

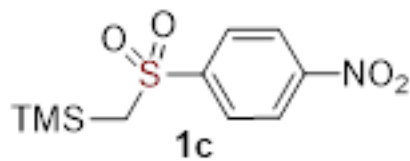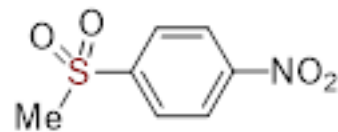

<sup>1</sup>H 400M, CDCl<sub>3</sub>

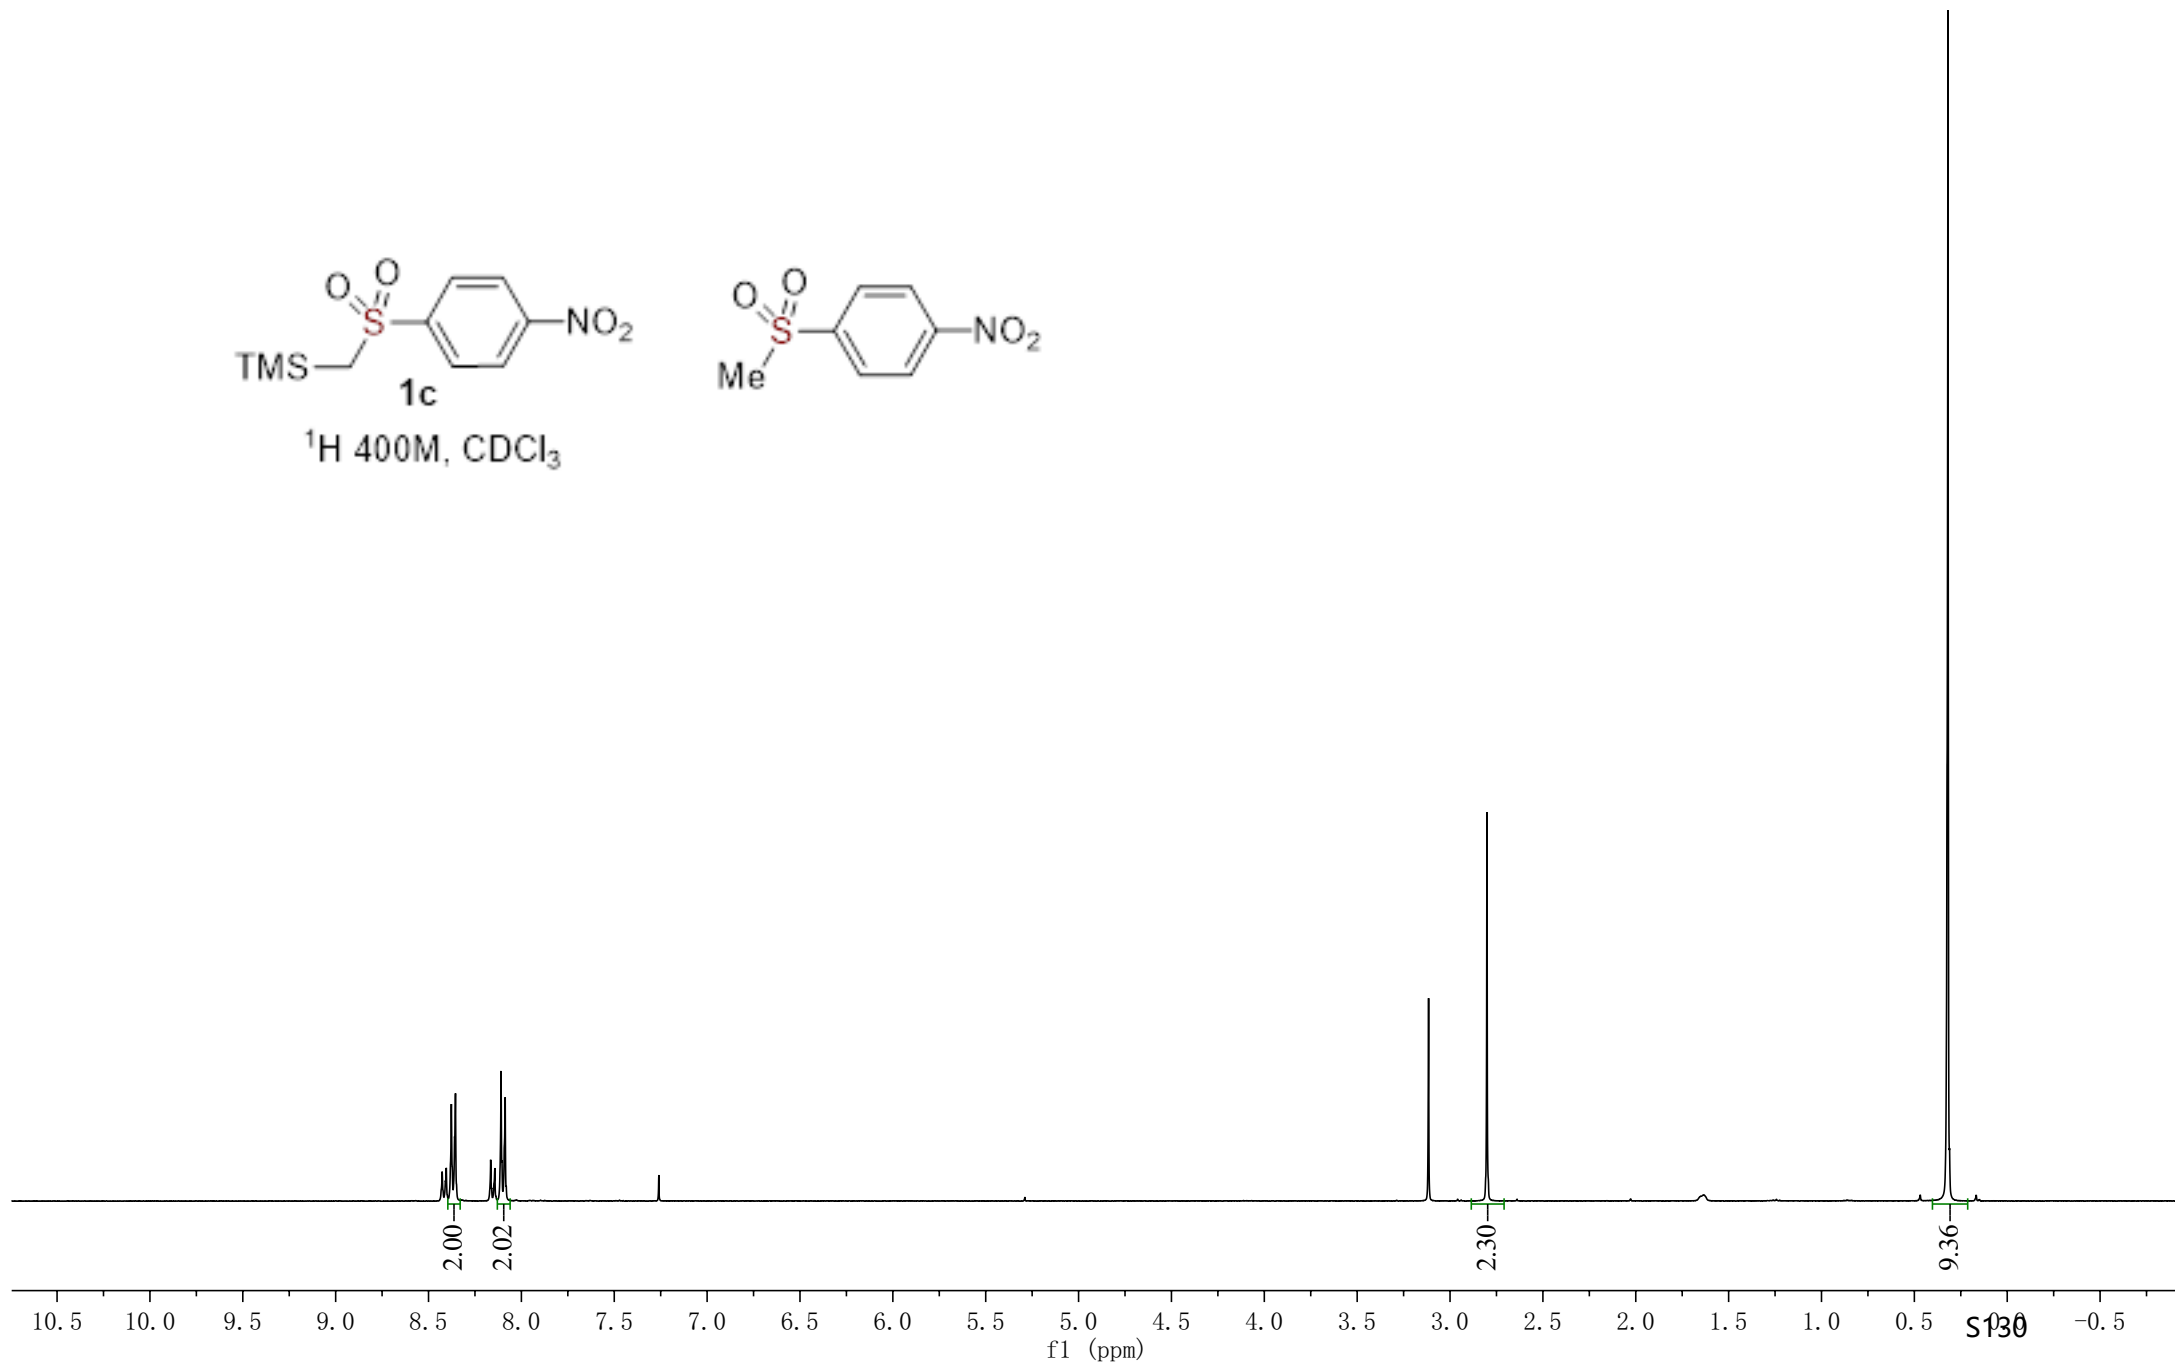

zwjiao-D839-C  
zwjiao-D839-C

—149.17

129.09  
128.29  
124.55

77.48  
77.16  
76.84

—48.31

—0.45

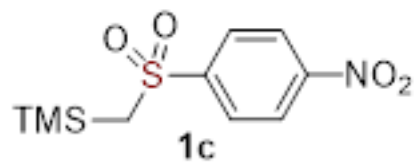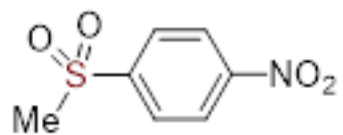

<sup>13</sup>C 101M, CDCl<sub>3</sub>

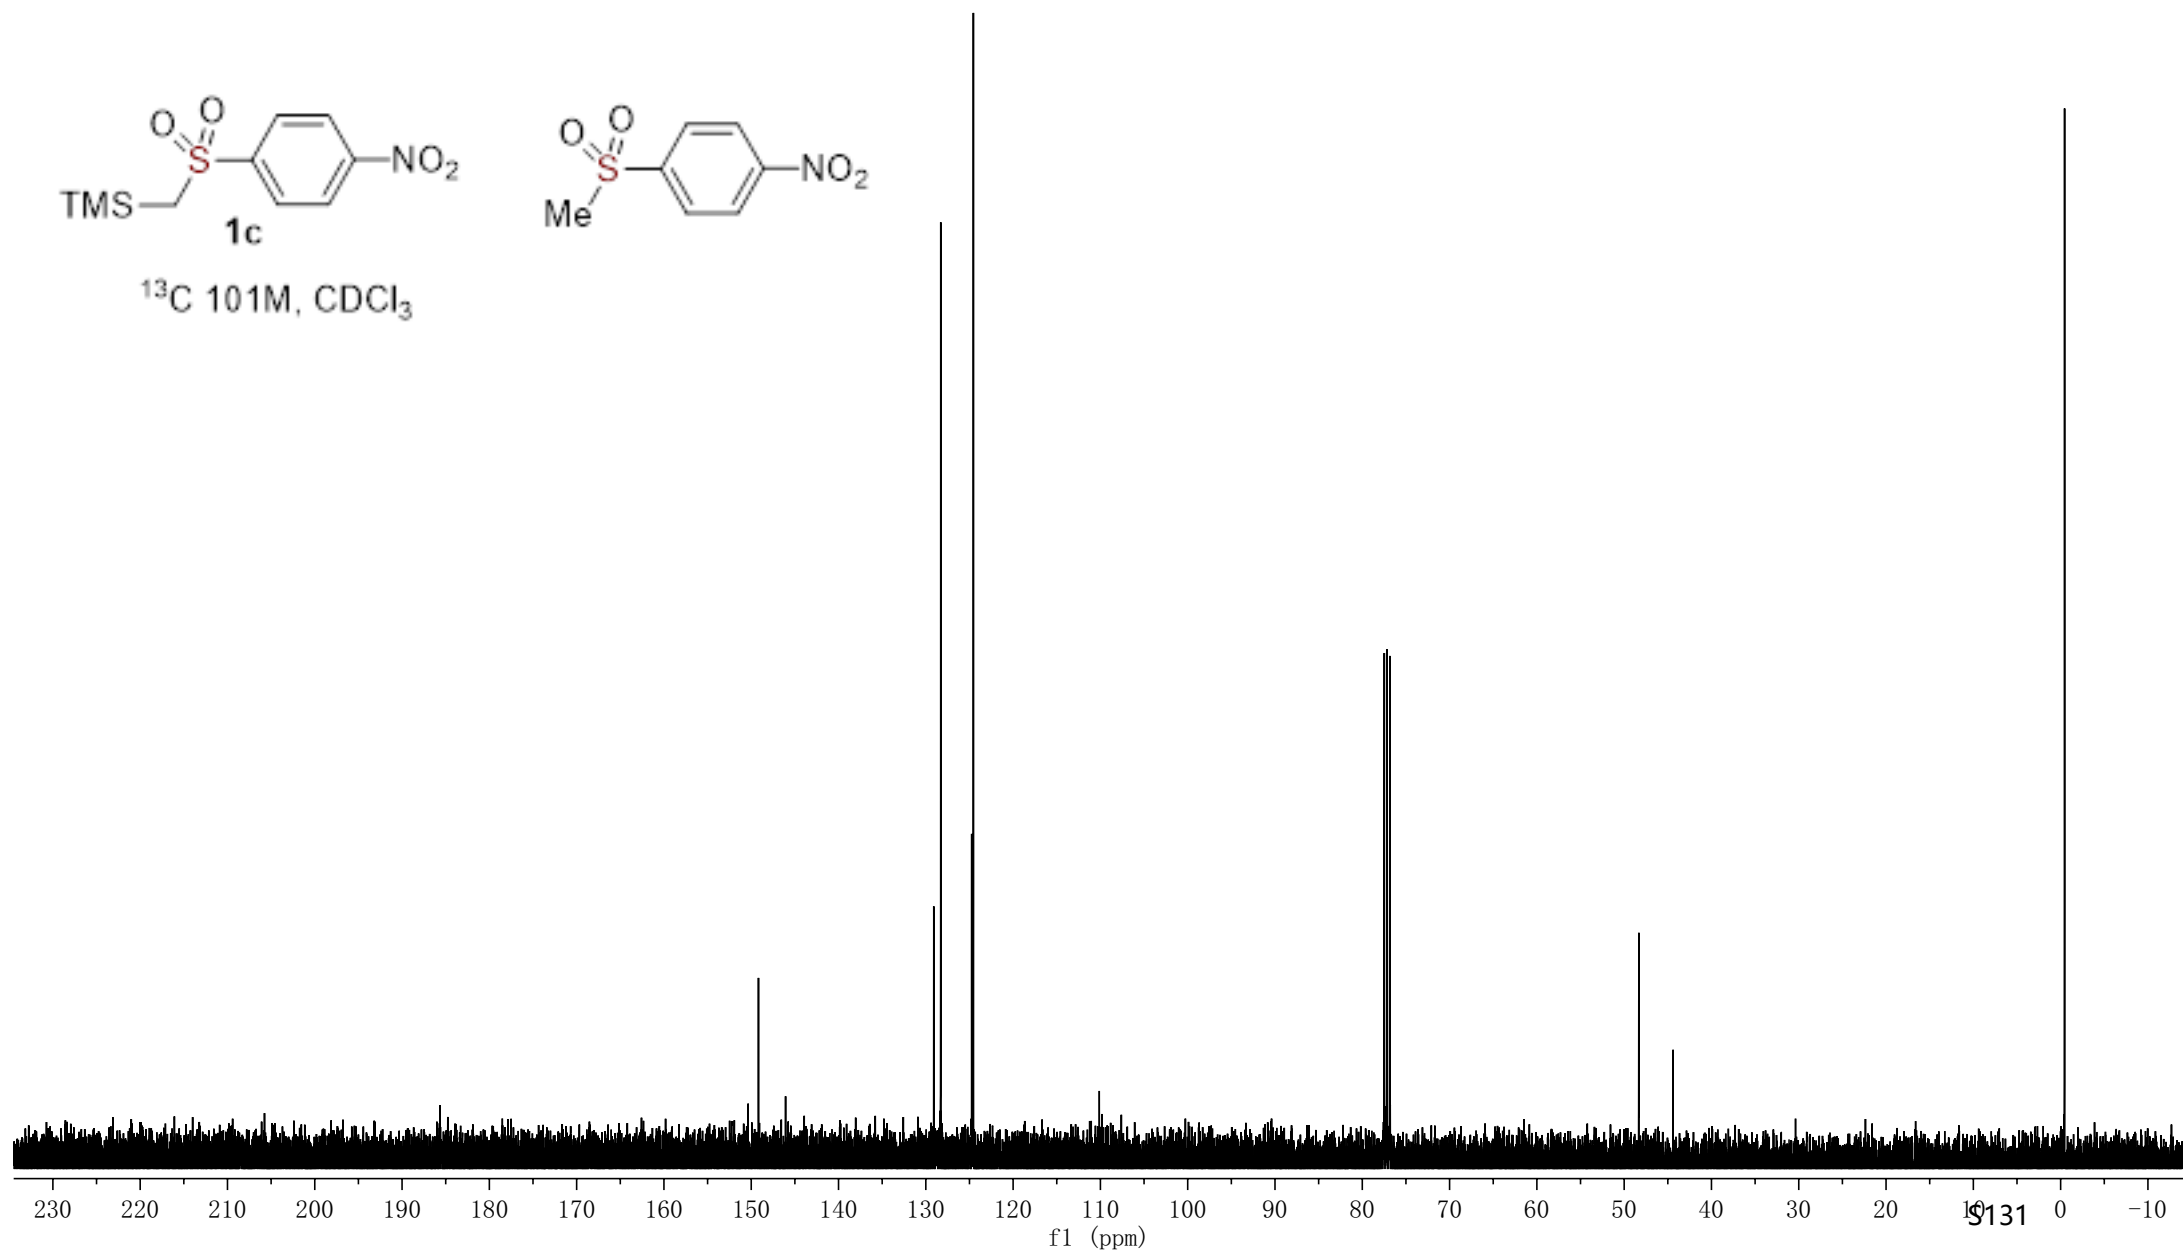

zwjiao-D845-H  
zwjiao-D845-H

7.92  
7.92  
7.91  
7.91  
7.90  
7.89  
7.89  
7.26  
7.20  
7.18  
7.16  
7.16

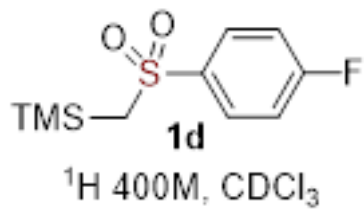

-2.77

0.27

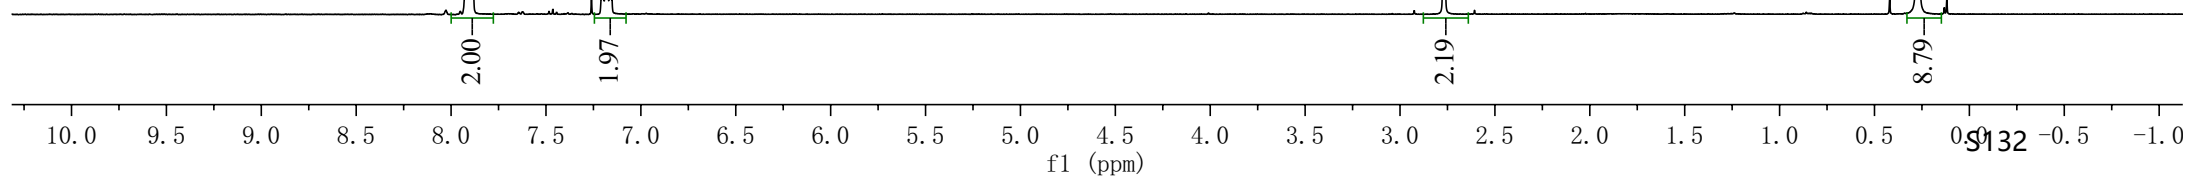

---105.55

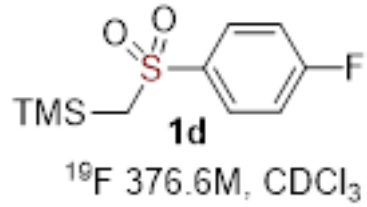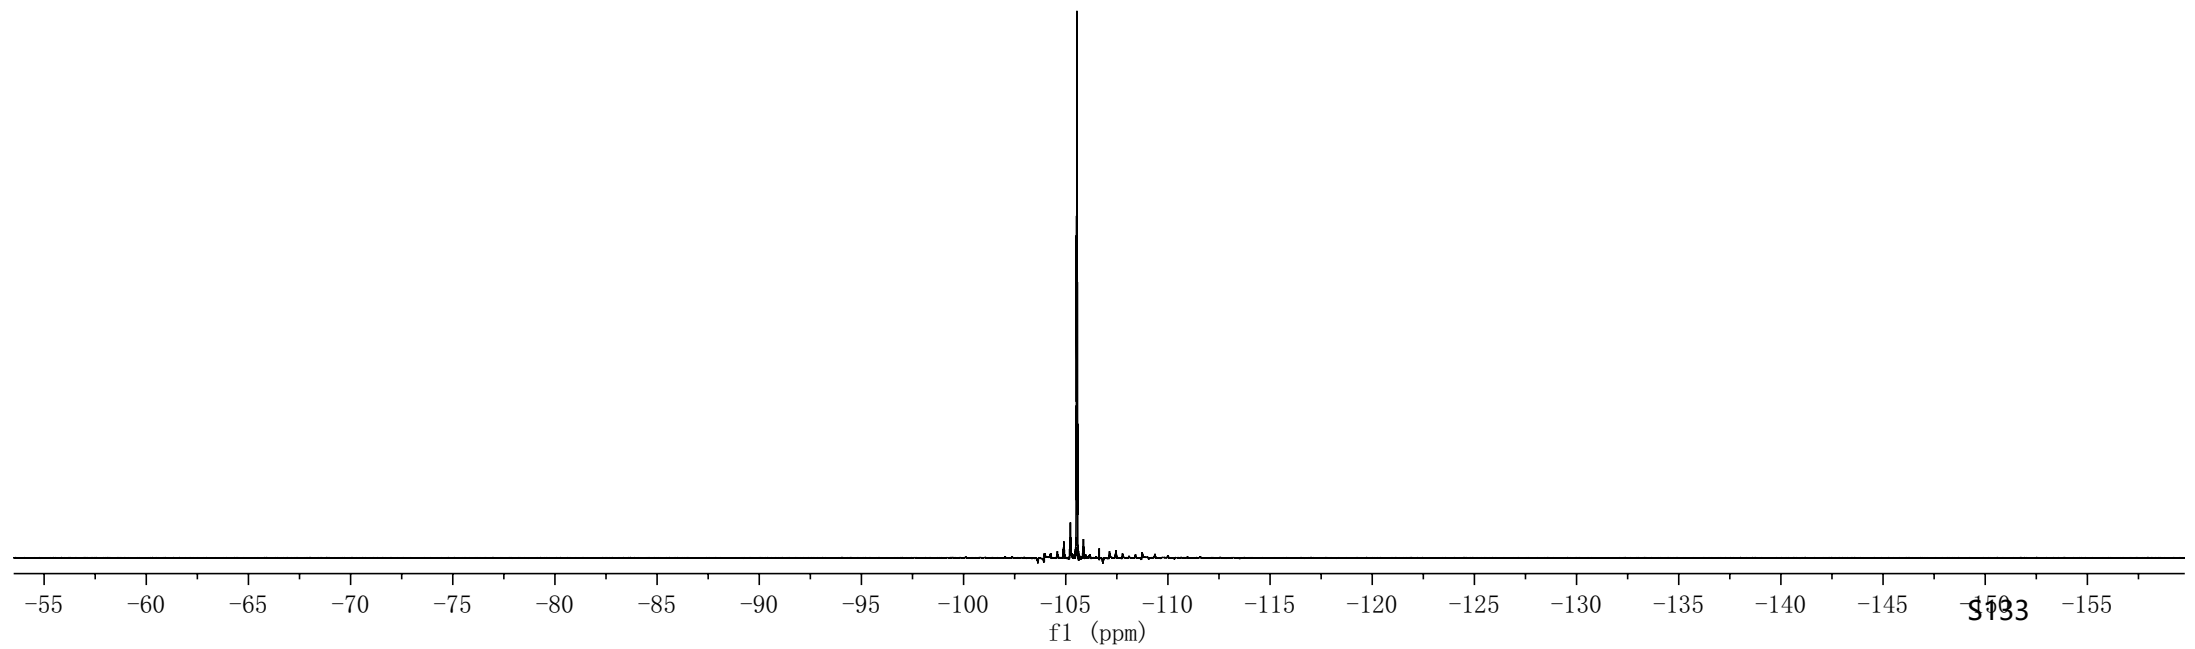

zwjiao-D845-C  
zwjiao-D845-C

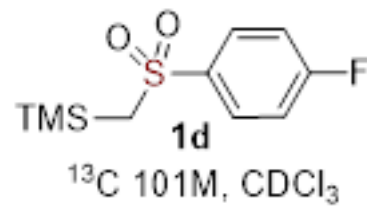

166.56  
164.02

140.00  
139.97

129.64  
129.55

116.50  
116.28

77.48  
77.16  
76.84

48.79

0.58

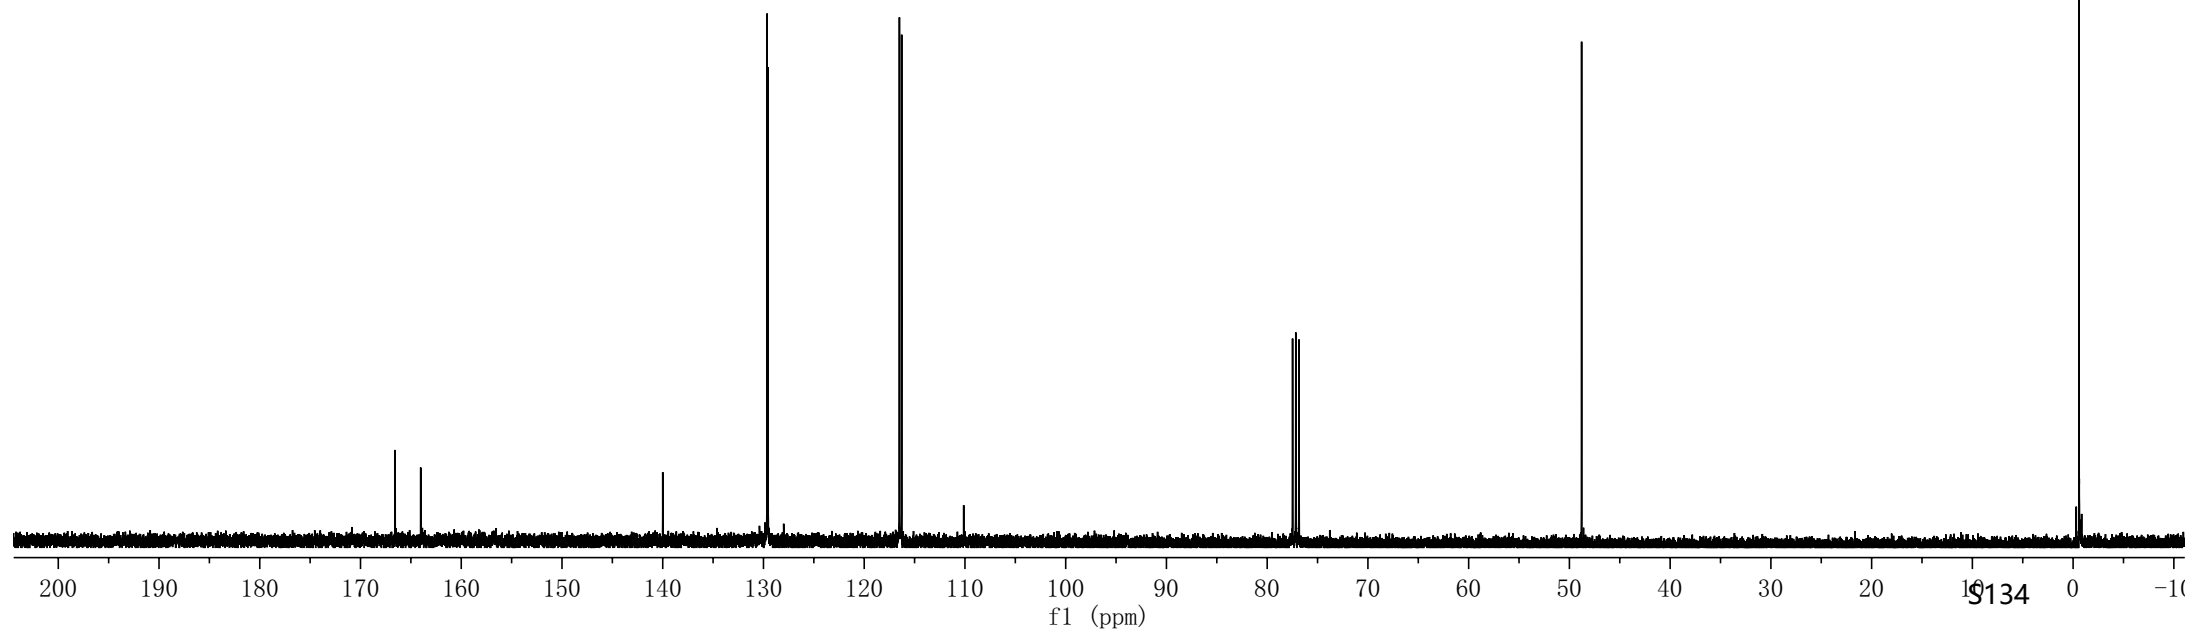

zwjiao-D843-H  
zwjiao-D843-H

7.85  
7.85  
7.83  
7.50  
7.48  
7.26

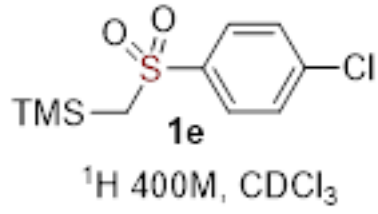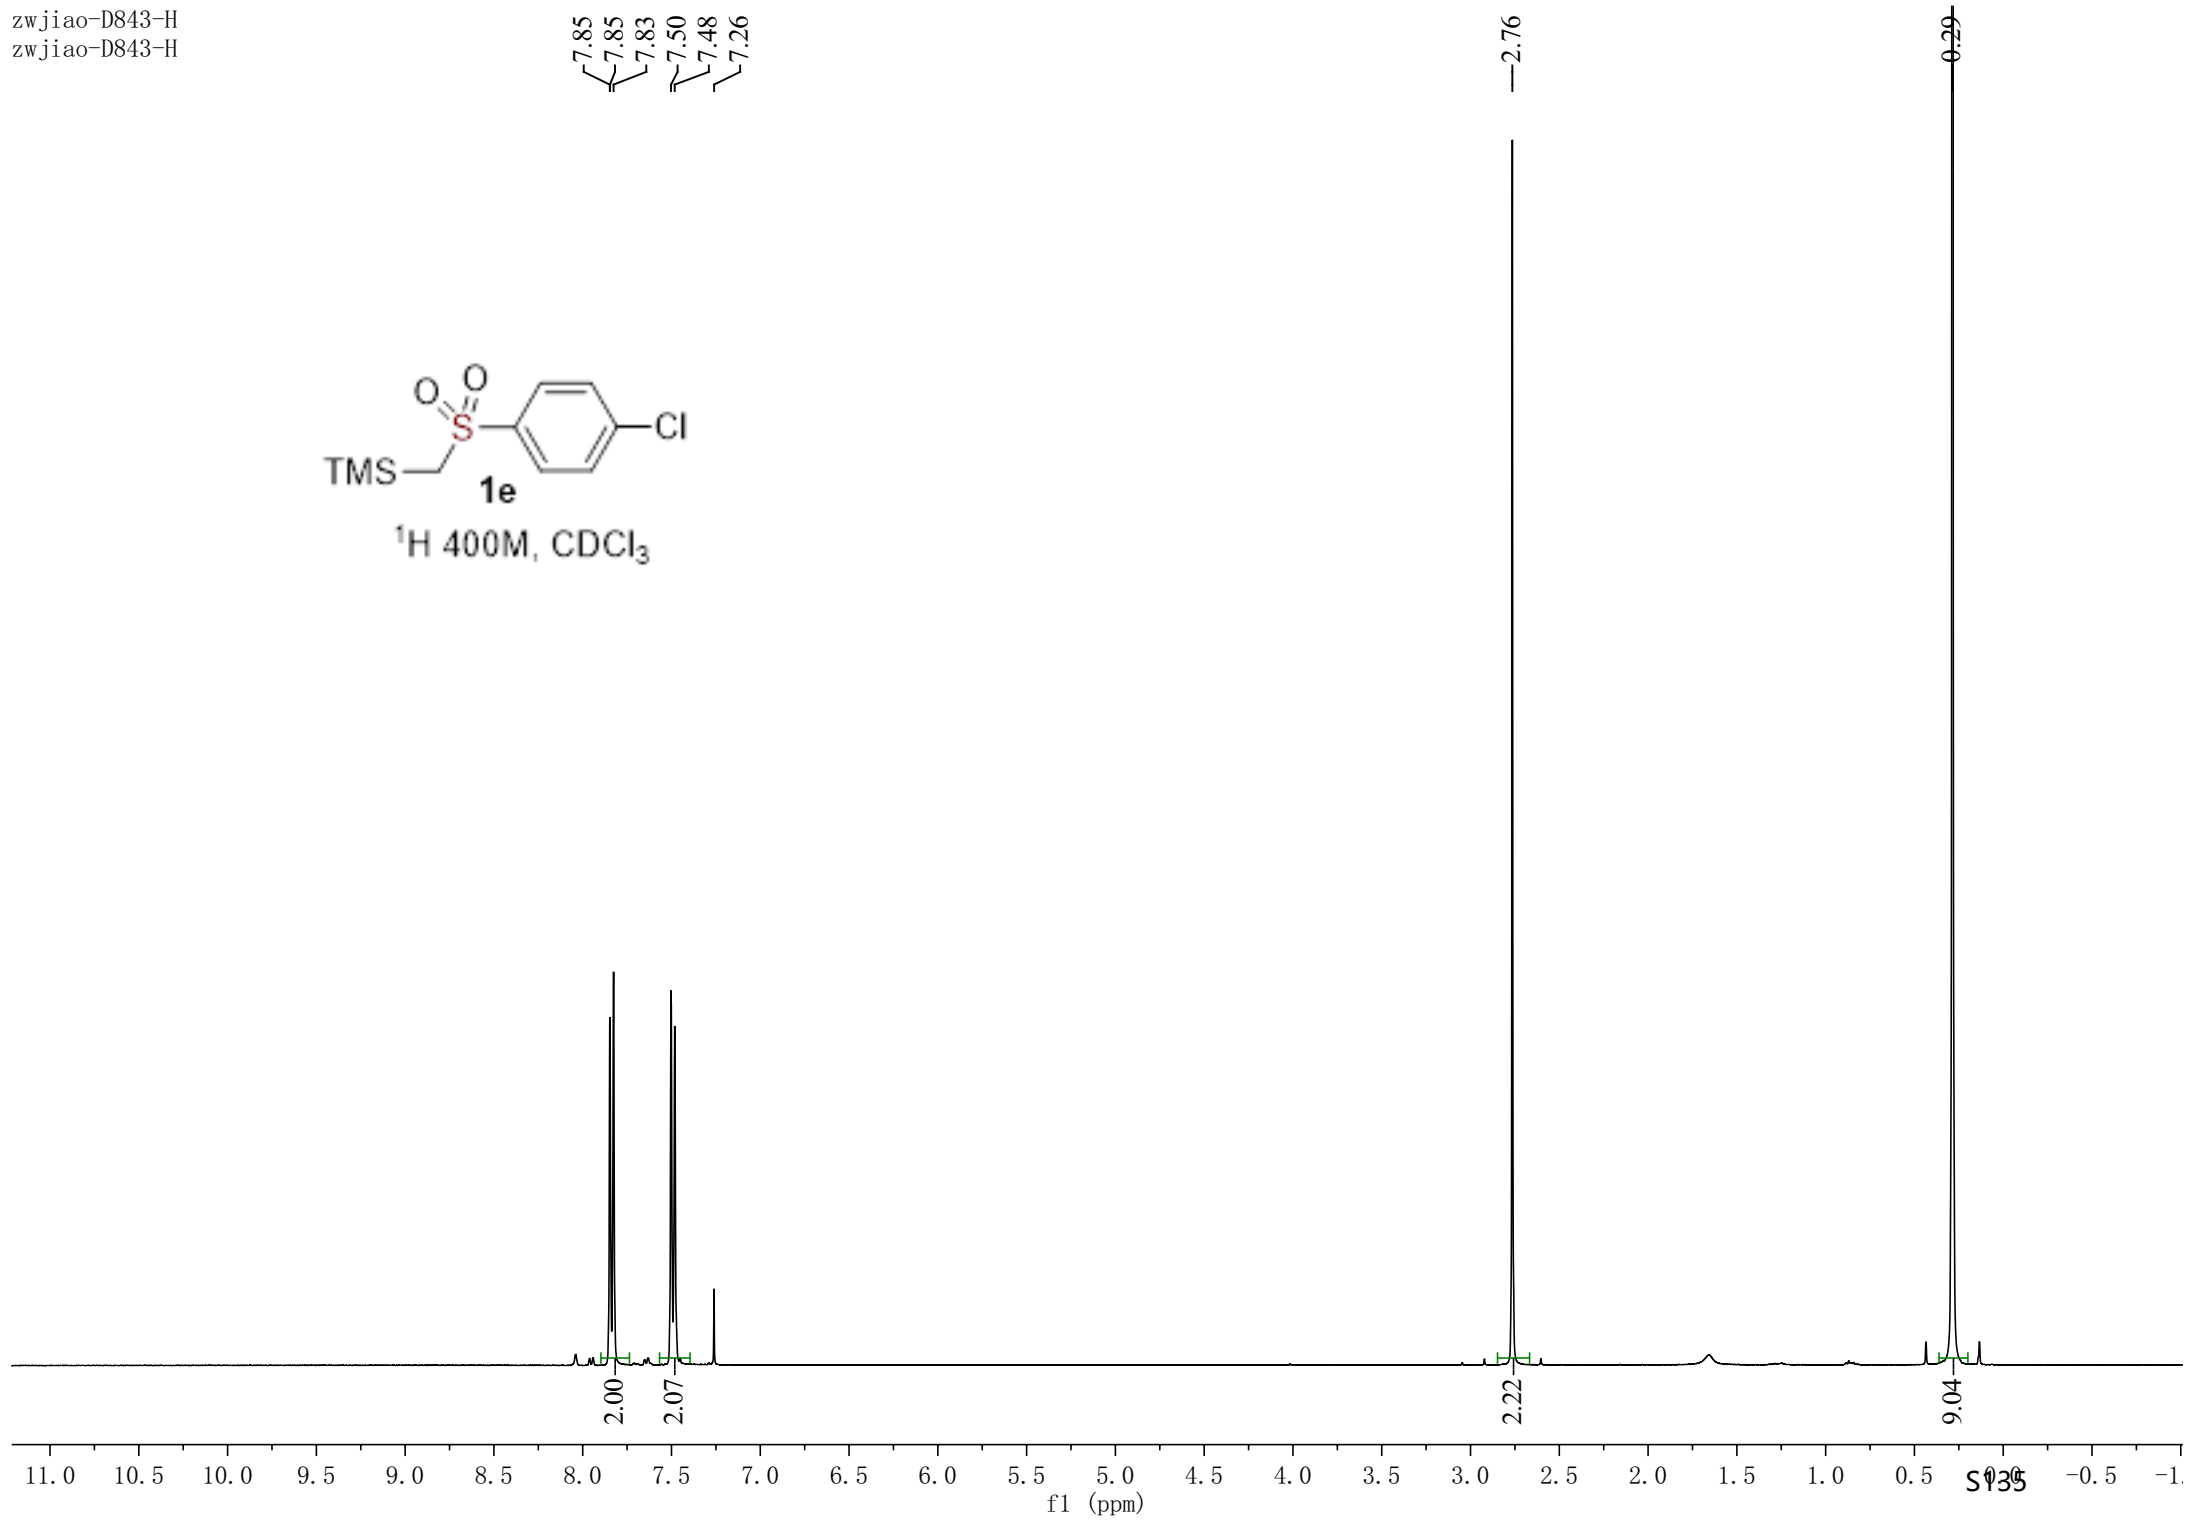

zwjiao-D843-C  
zwjiao-D843-C

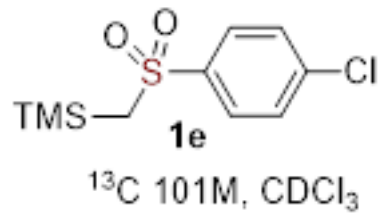

142.35  
139.51

129.52  
128.36

77.48  
77.16  
76.84

48.66

-0.52

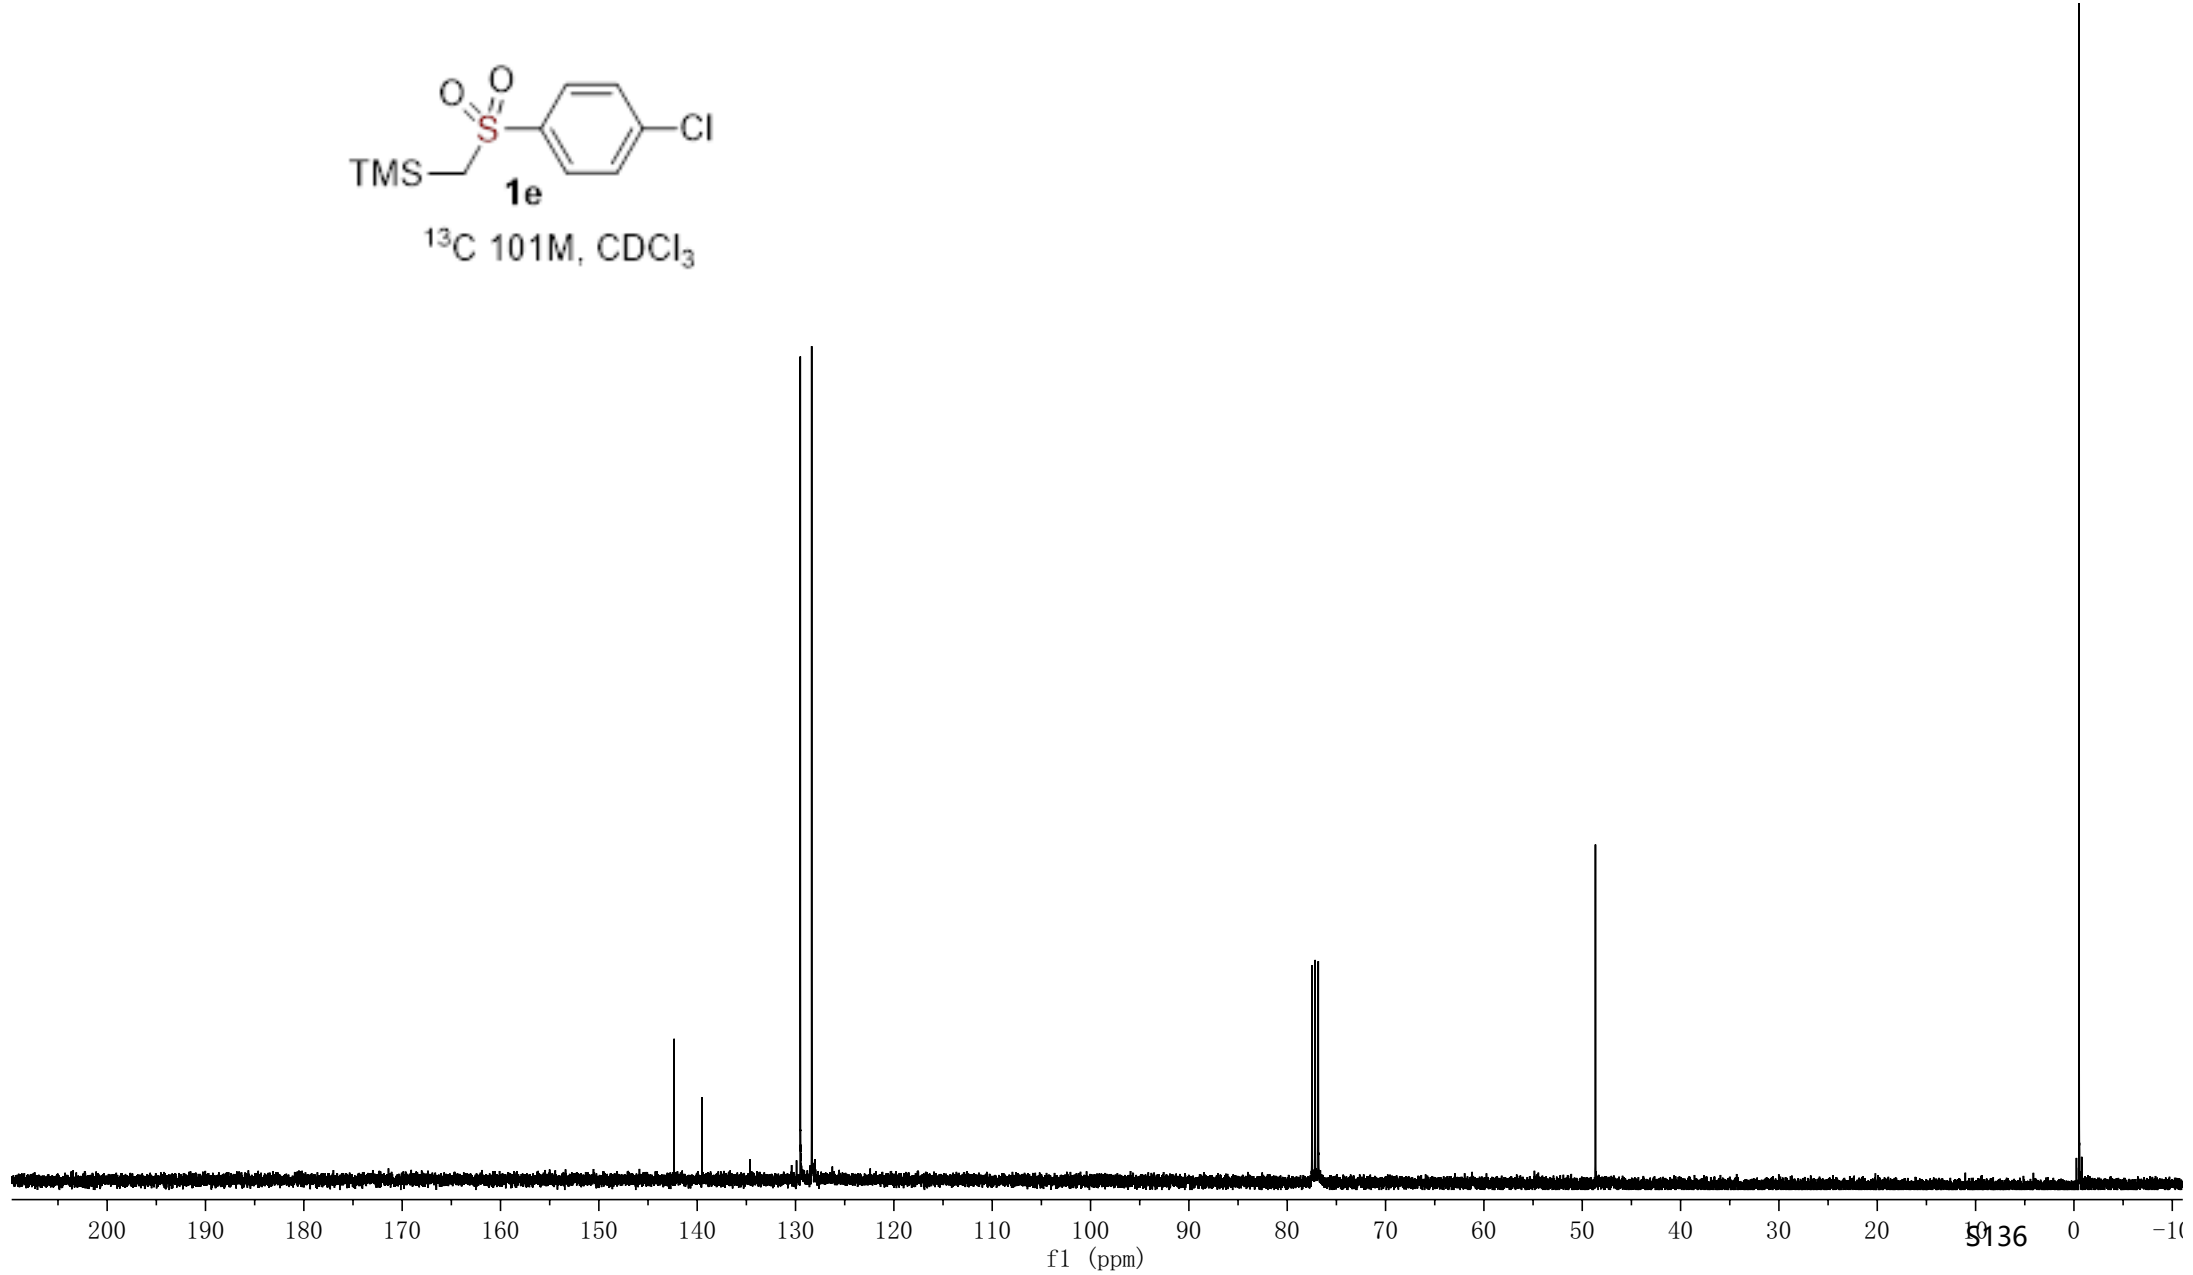



zwjiao-D844-H  
zwjiao-D844-H

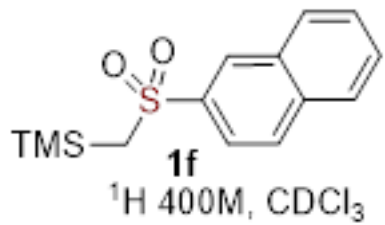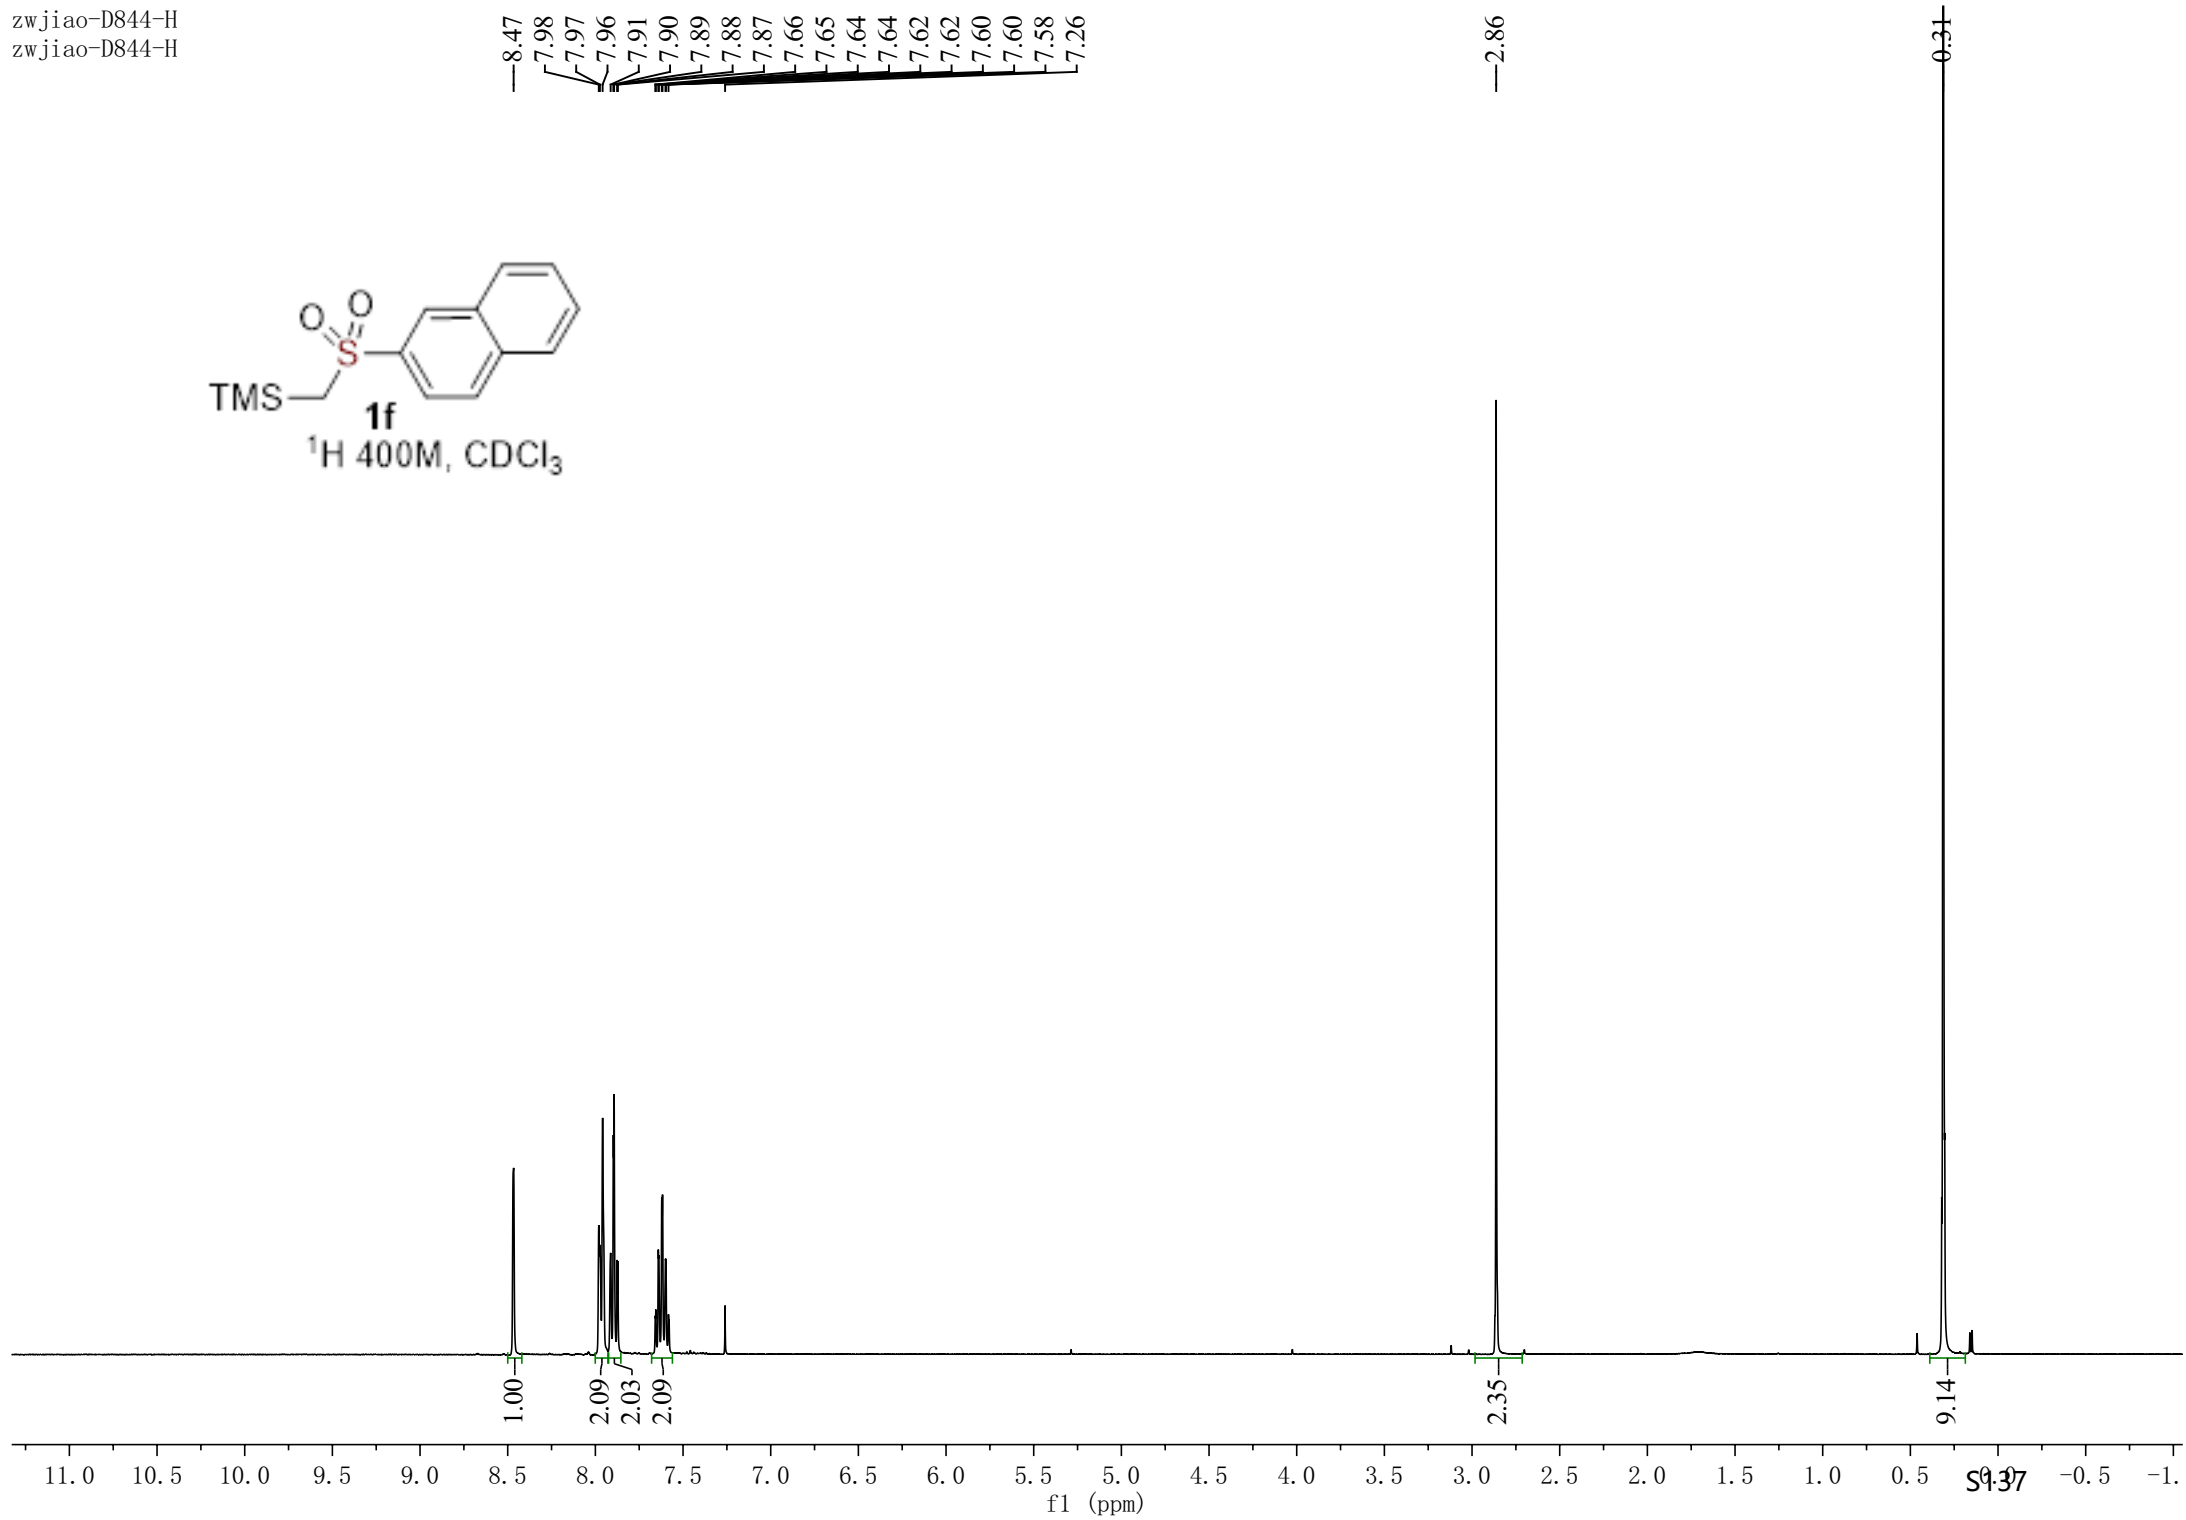

S9-37

zwjiao-D844-C  
zwjiao-D844-C

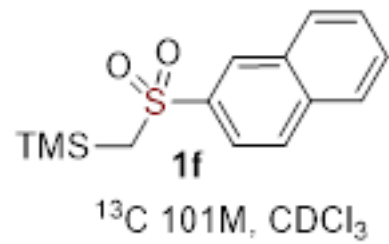

140.71  
135.01  
132.30  
129.56  
129.43  
128.94  
128.03  
127.94  
127.66  
122.17

77.48  
77.16  
76.84

48.60

0.49

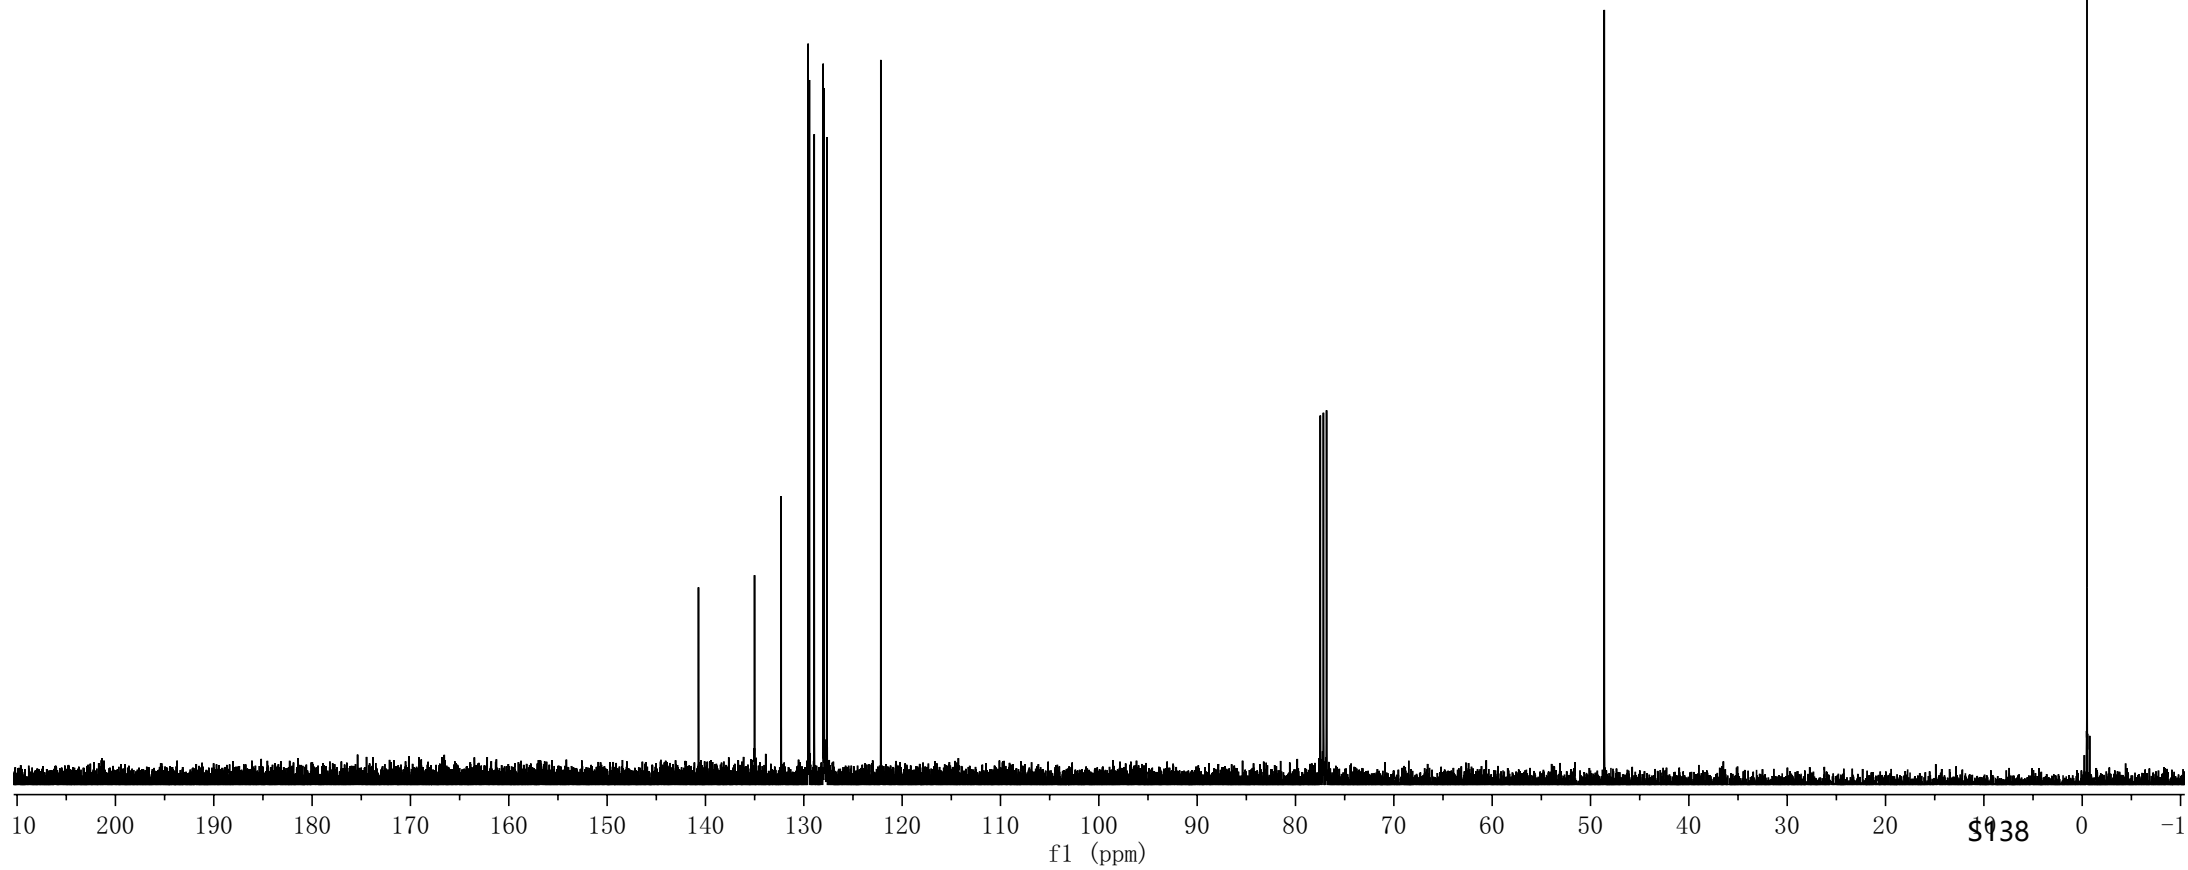

zwjiao-D854-H  
zwjiao-D854-H

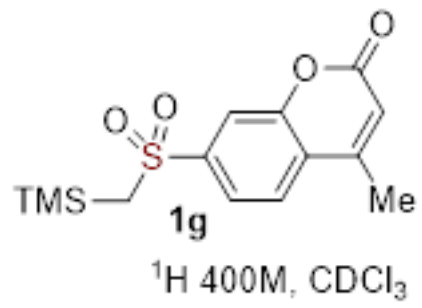

7.80  
7.78  
7.78  
7.75  
7.73  
7.26

6.39

2.80

2.47

0.30

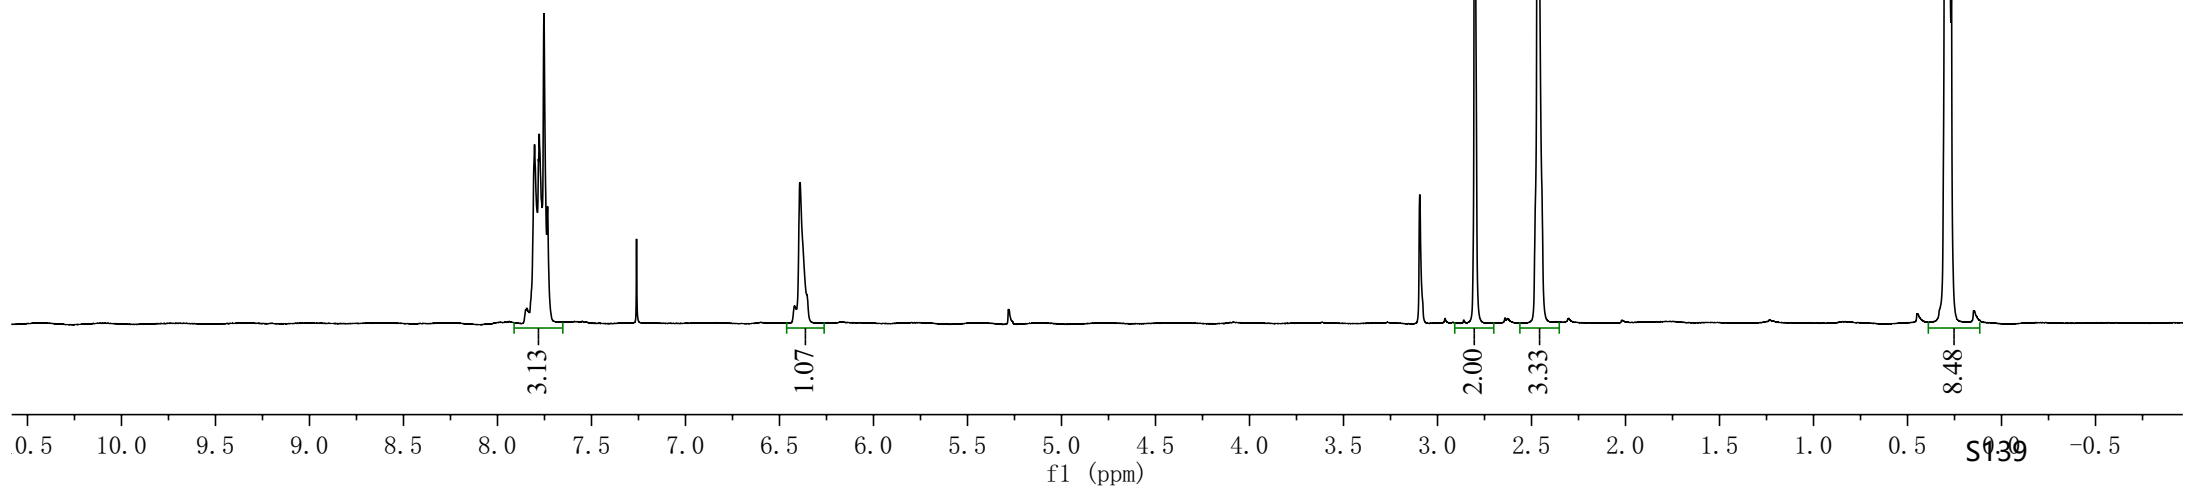

S139

zwjiao-D854-C  
zwjiao-D854-C

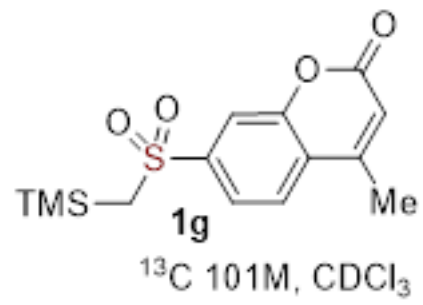

—159.43

~153.23

~150.98

~146.32

~125.78

~123.28

~121.89

~117.45

~115.64

~77.35

~77.03

~76.71

—48.22

—18.73

—0.62

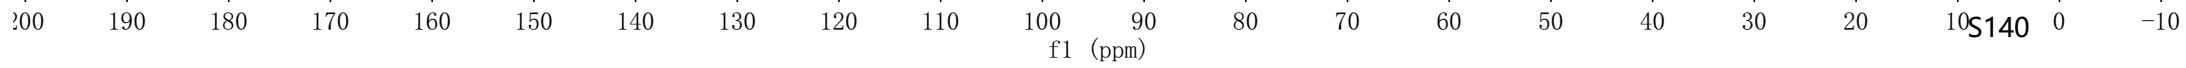

zwjiao-D782-H  
zwjiao-D782-H

8.68  
8.67  
8.67  
8.67  
8.66  
8.66  
7.99  
7.99  
7.98  
7.50  
7.49  
7.49  
7.49  
7.48  
7.48  
7.48  
7.47  
7.47  
7.47  
7.46  
7.46

2.99

0.25

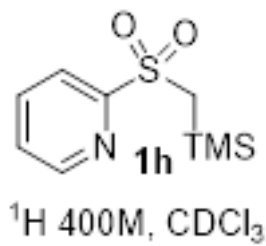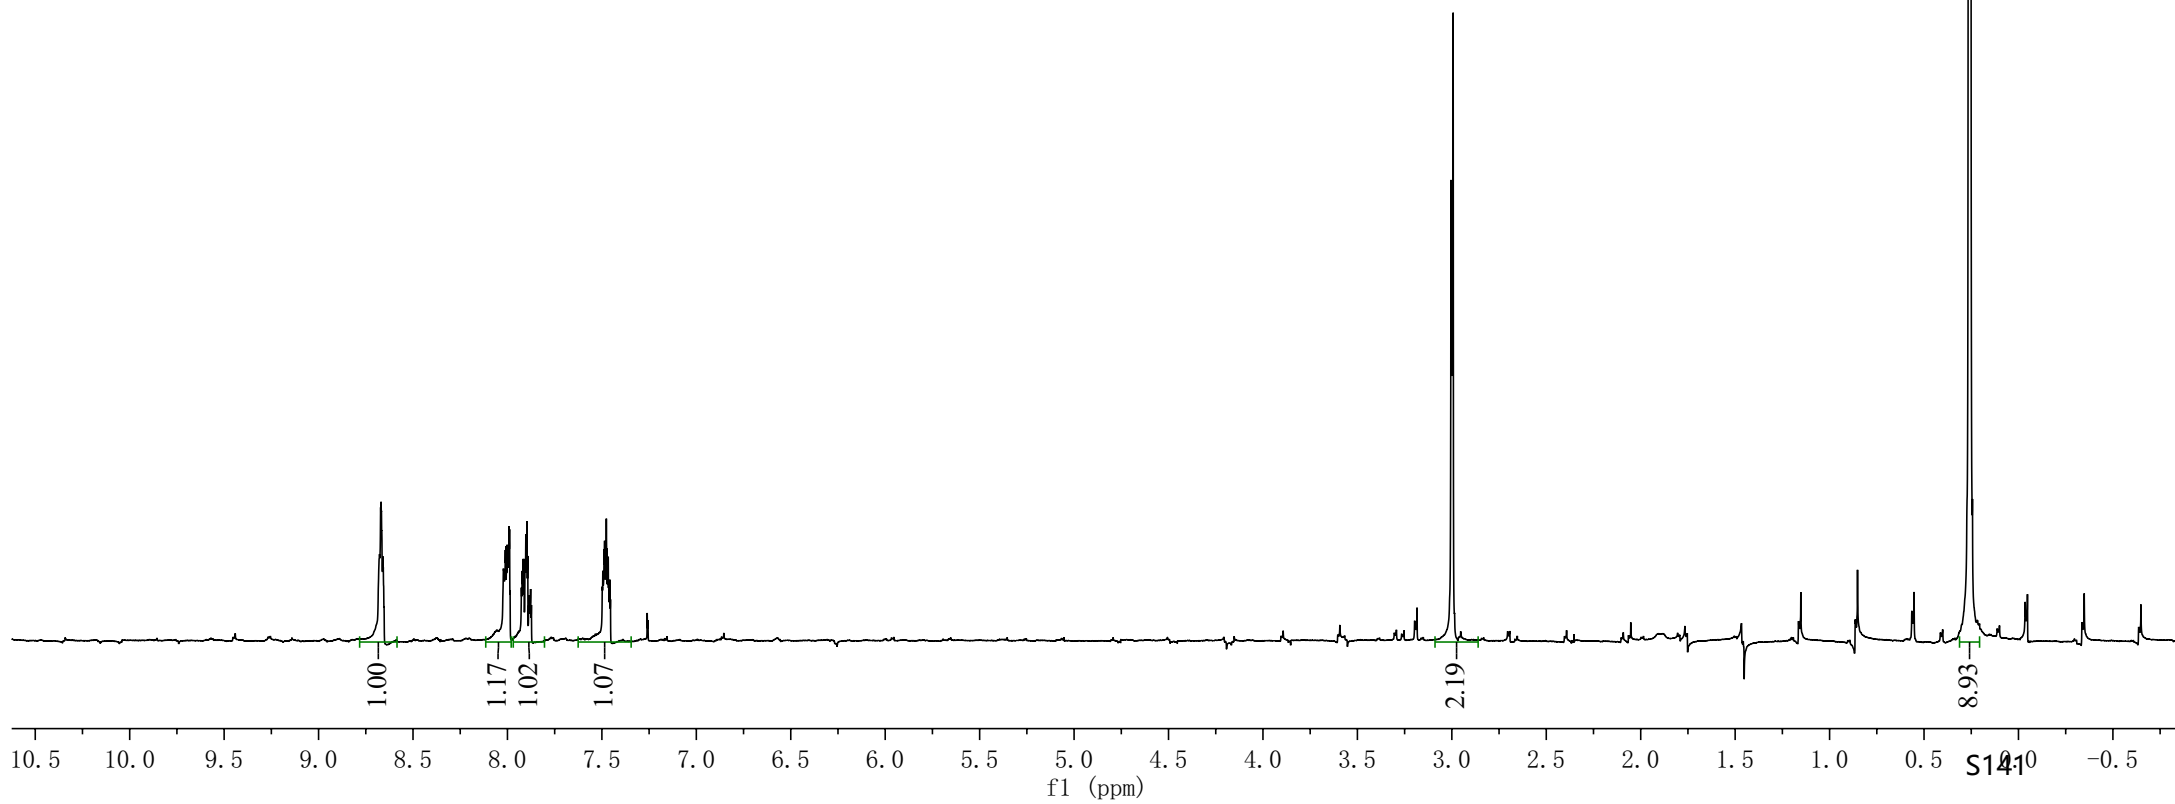

zwjiao-D782-C  
zwjiao-D782-C

—159.98

—149.93

—138.20

—126.96

—120.48

—77.48

—77.16

—76.84

—42.86

—0.58

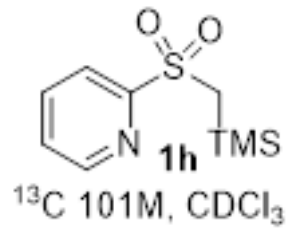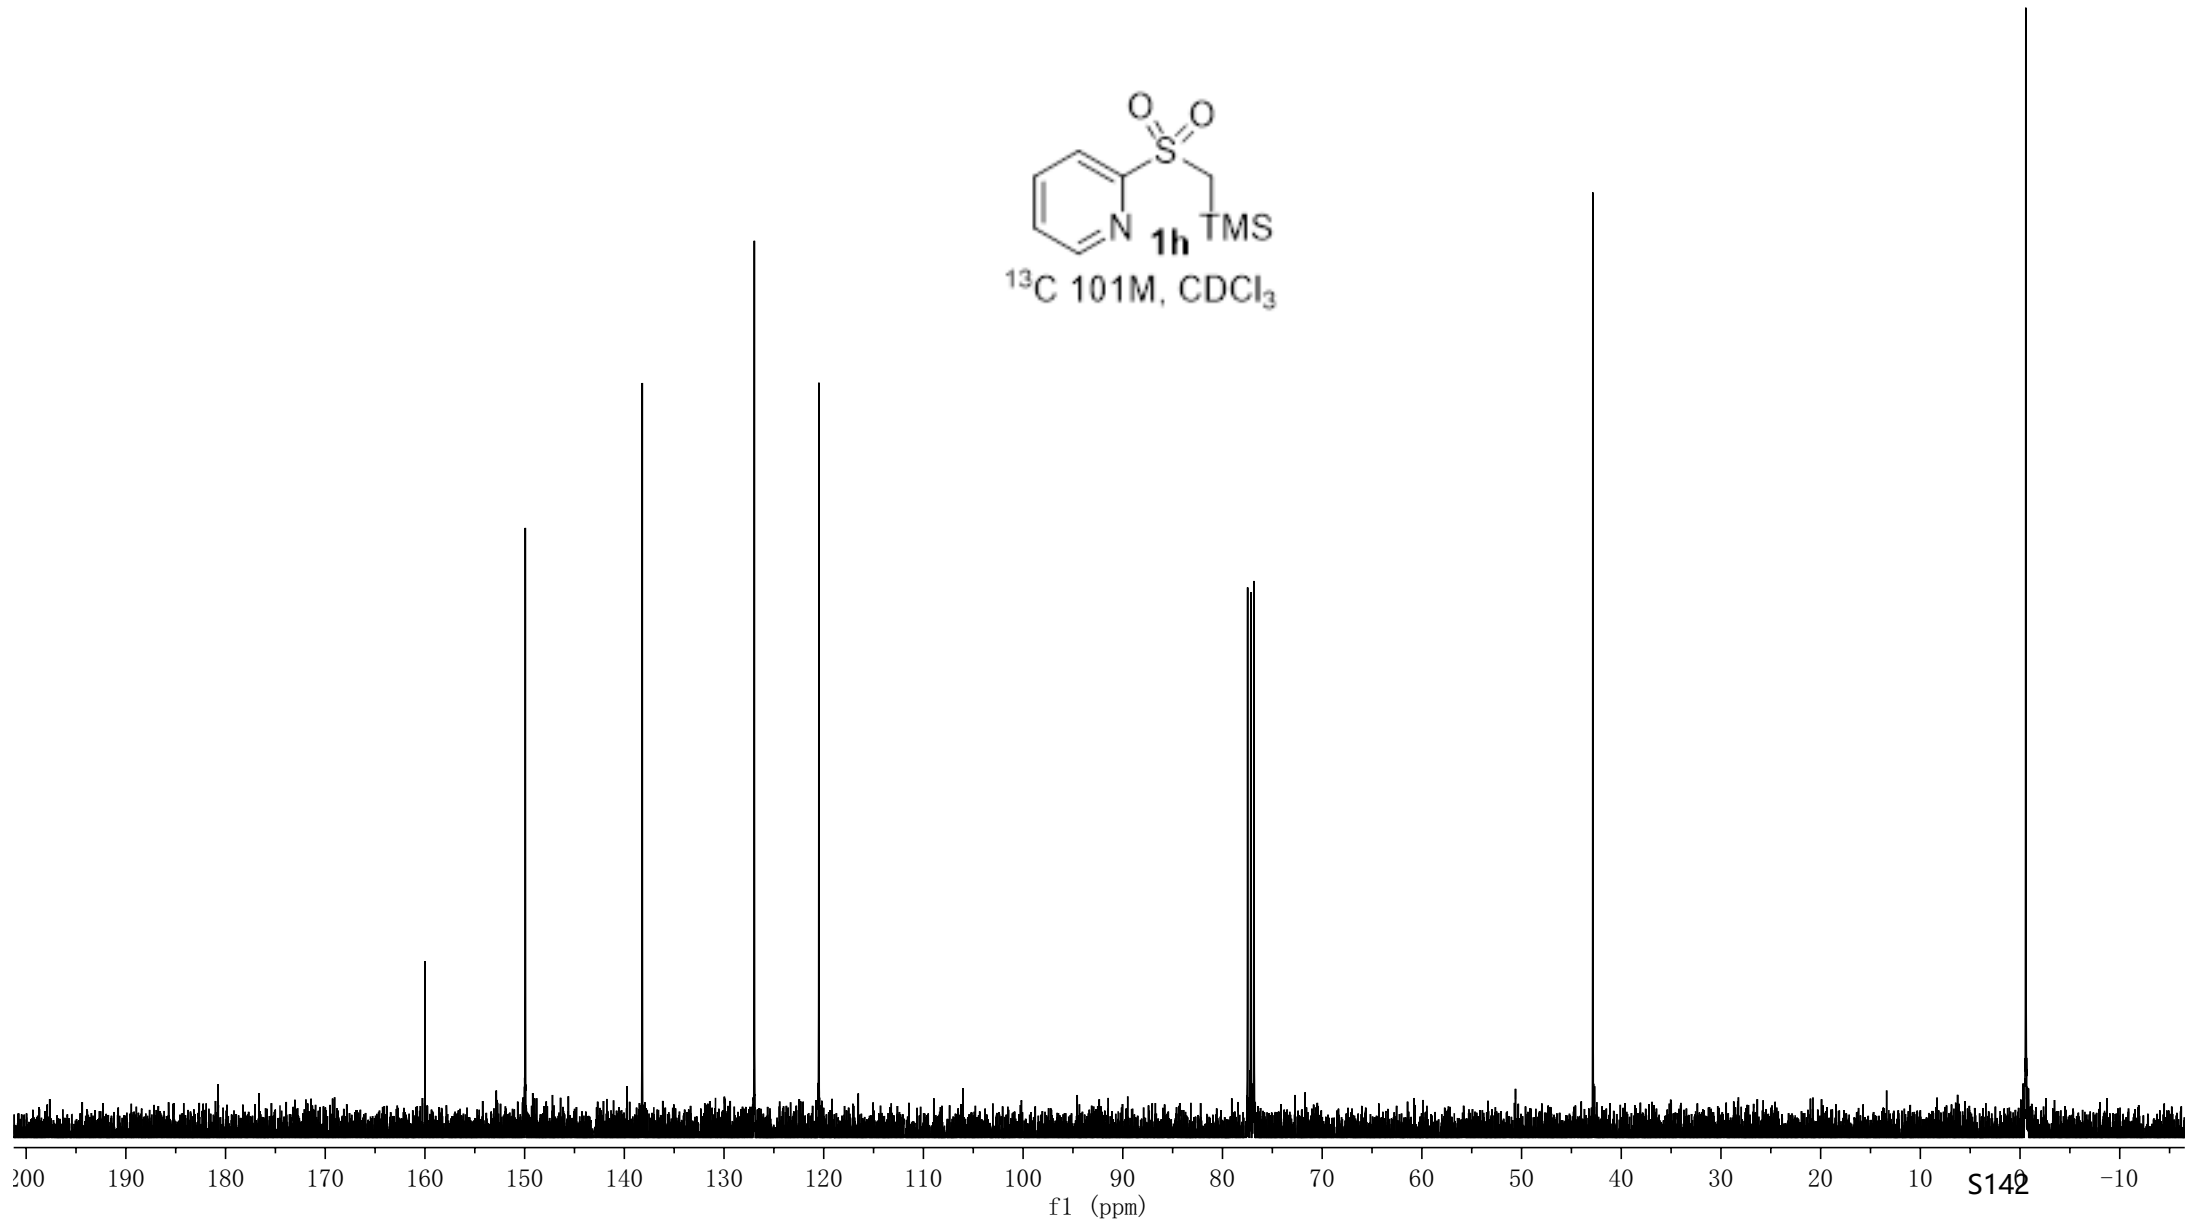

S142

zwjiao-D837-H  
zwjiao-D837-H

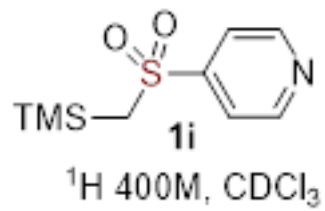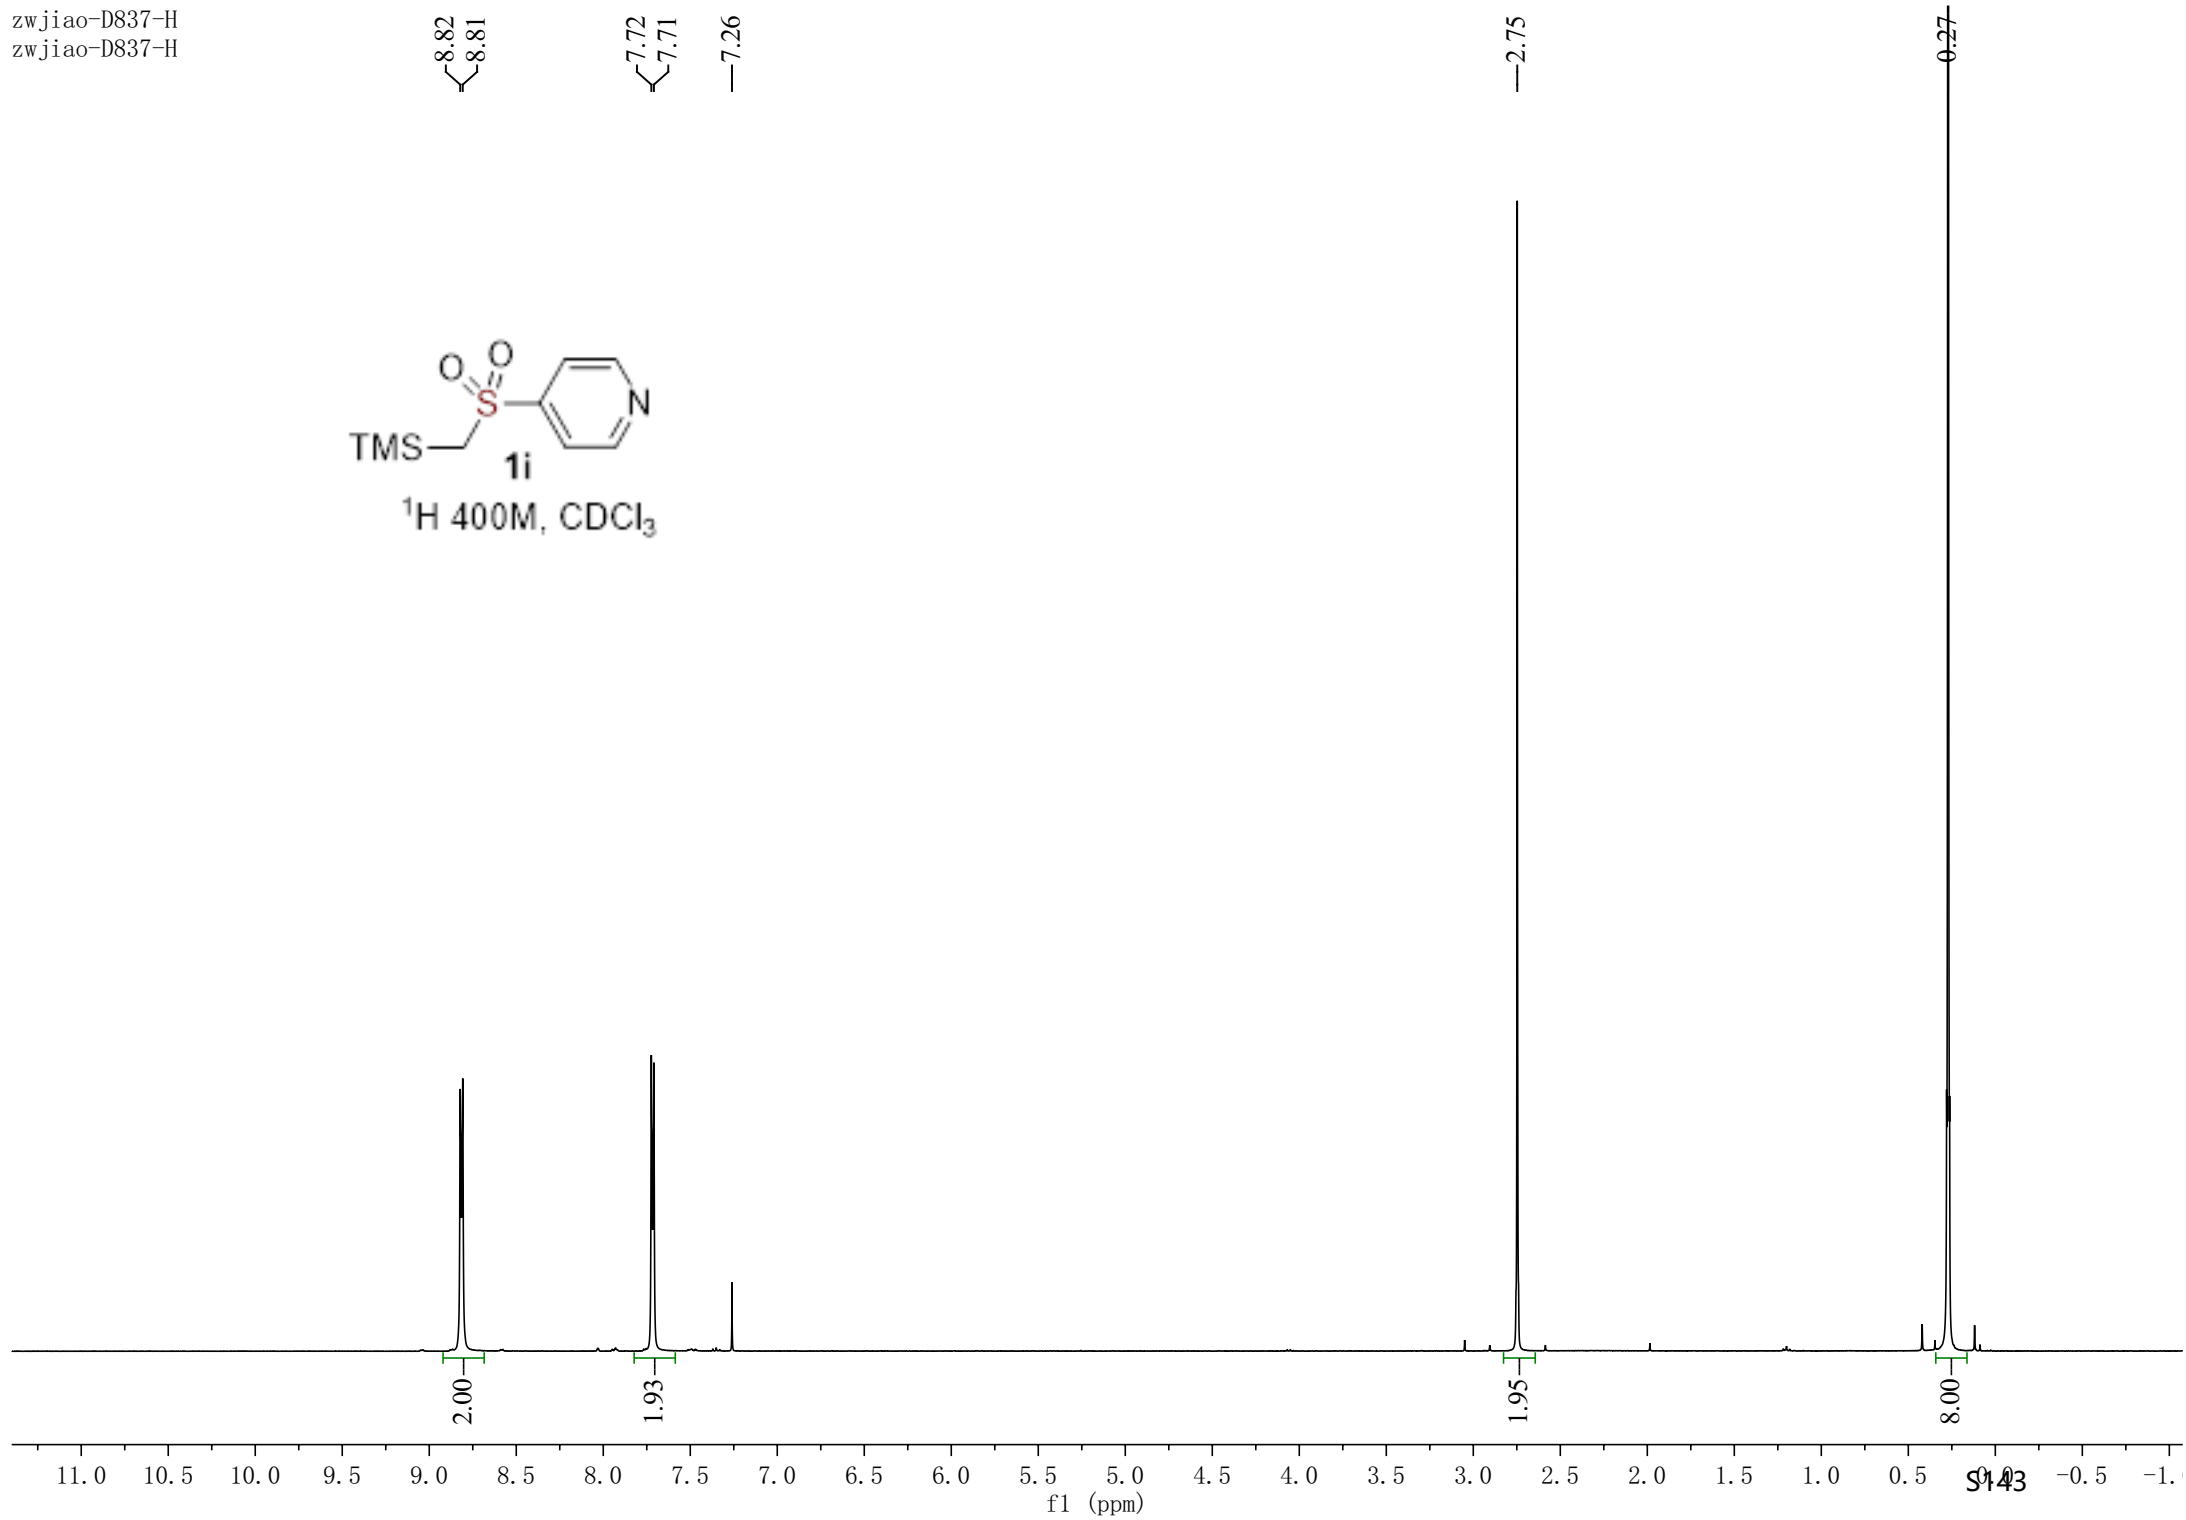

zwjiao-D837-C  
zwjiao-D837-C

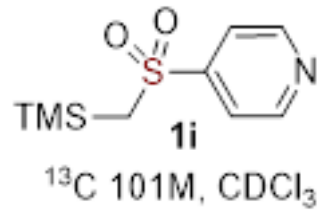

—151.20

—119.95

77.48  
77.16  
76.84

—47.58

—0.54

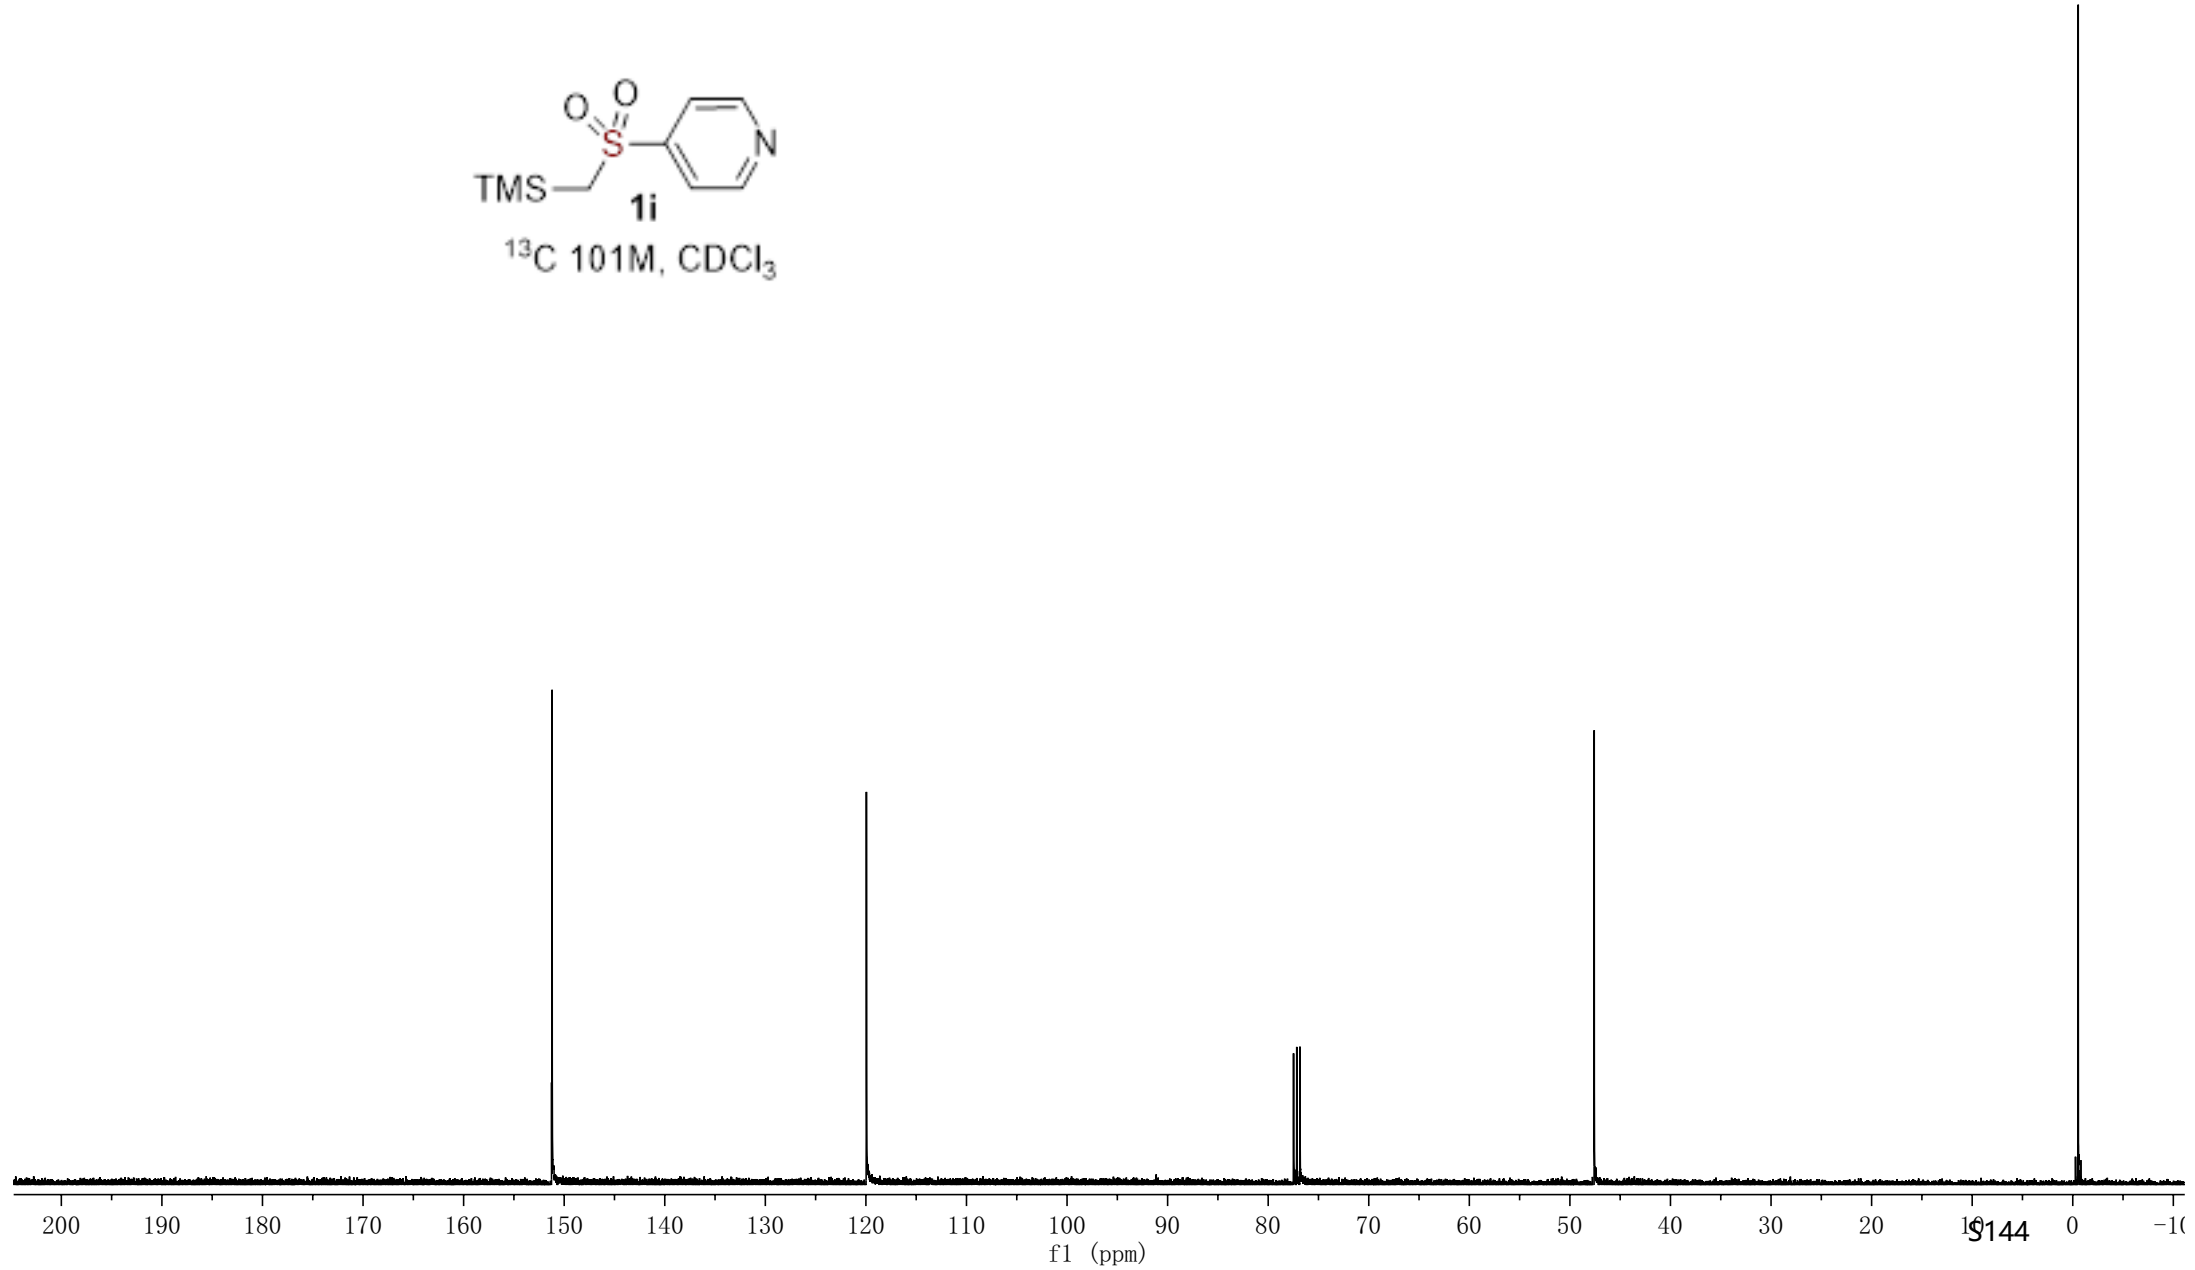



zwjiao-D816-H  
zwjiao-D816-H

8.85  
8.84

7.52  
7.51  
7.50  
7.26

3.05

0.21

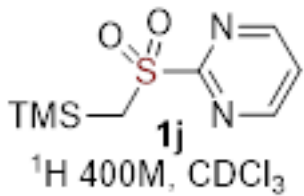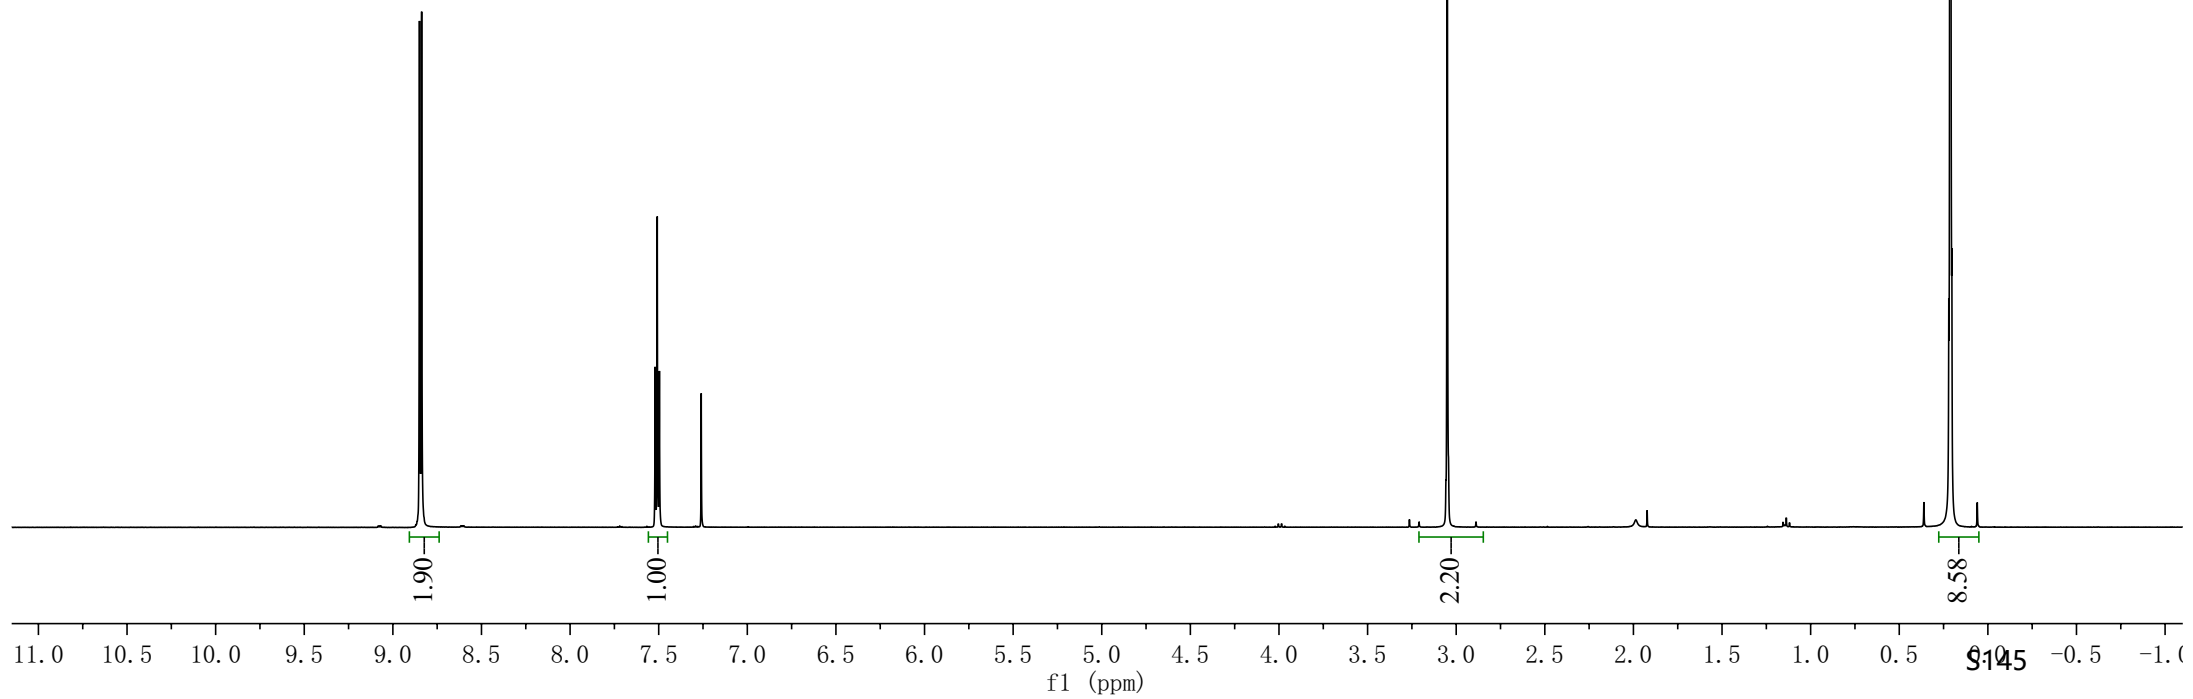

9145

zwjiao-D816-C  
zwjiao-D816-C

—167.19

—158.54

—123.57

77.54  
77.22  
76.90

—41.88

0.67

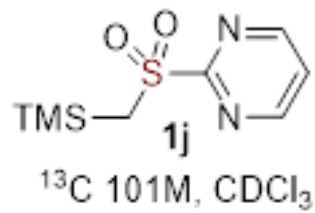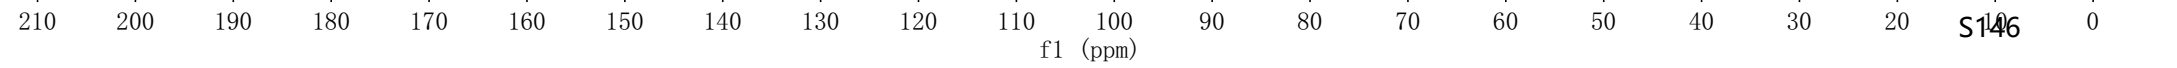

zwjiao-D833-H  
zwjiao-D833-H

8.15  
8.15  
8.13  
8.13  
7.97  
7.96  
7.95  
7.95  
7.94  
7.60  
7.60  
7.59  
7.58  
7.58  
7.57  
7.56  
7.55  
7.55  
7.53  
7.53  
7.53  
7.53  
7.51  
7.51  
7.26

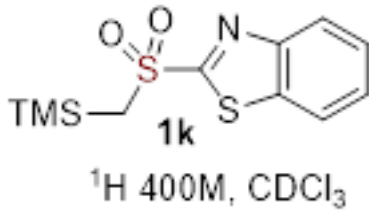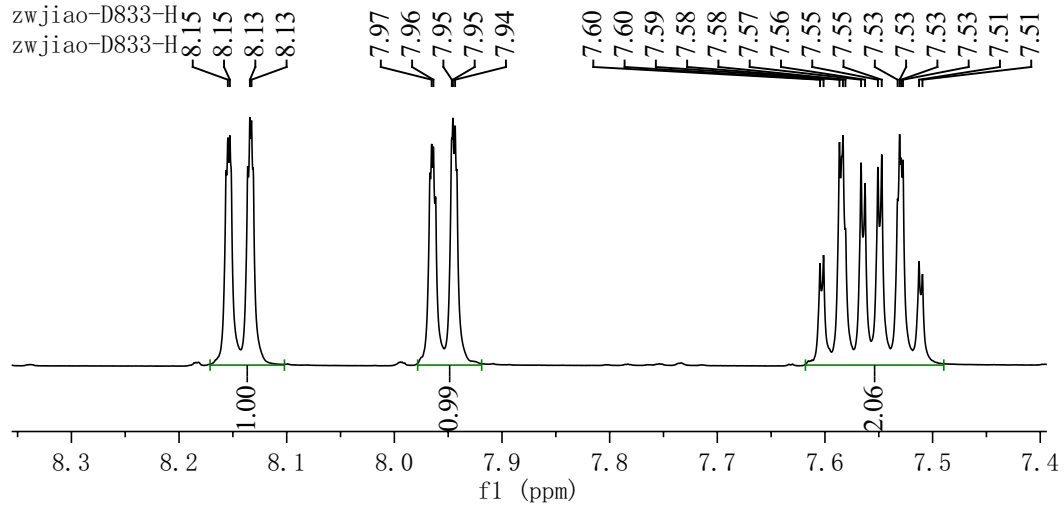

—3.19

0.34

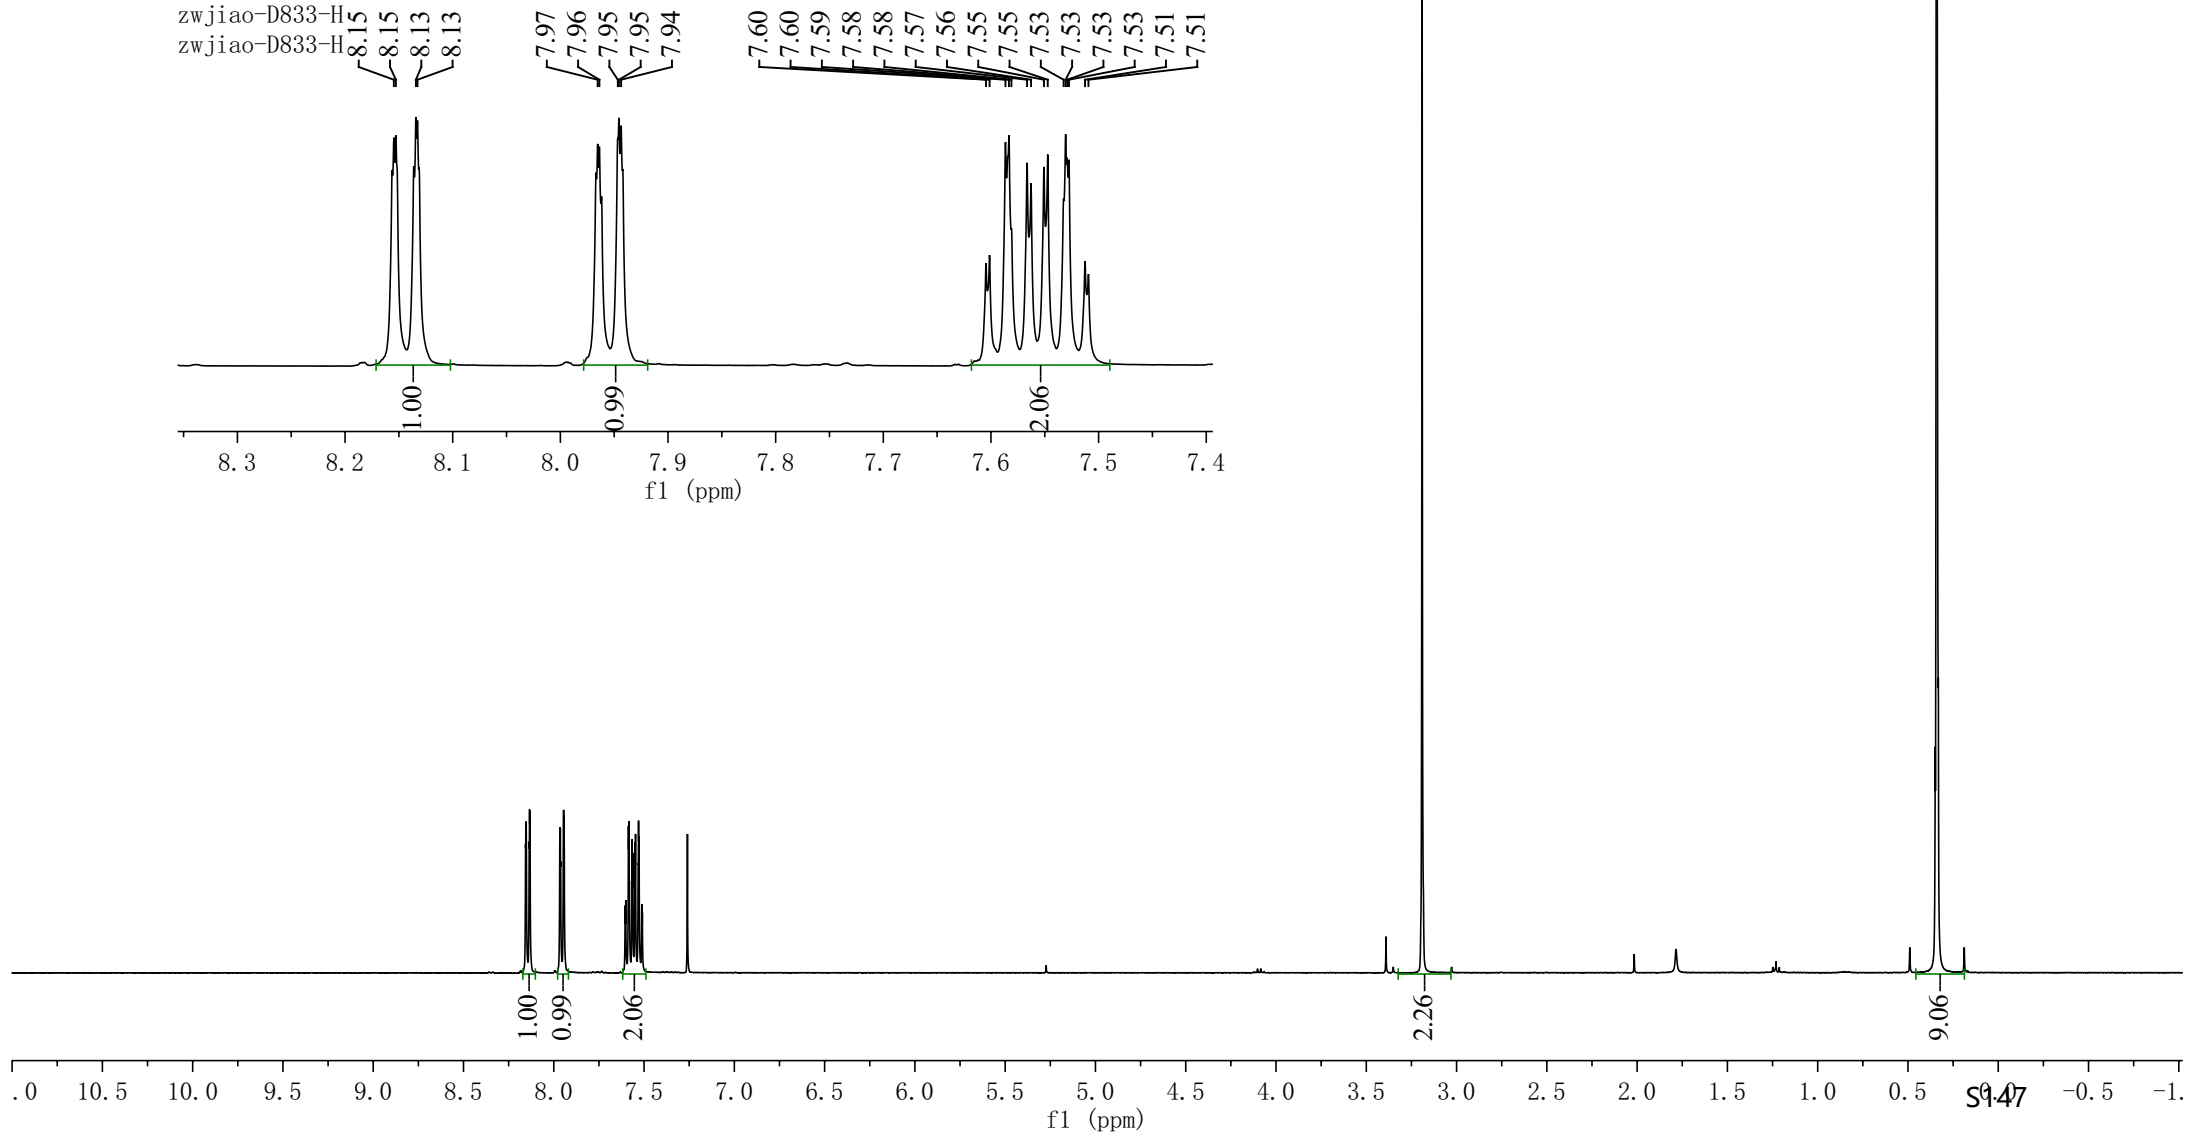

zwjiao-D833-C-1  
zwjiao-D833-C

—169.19

—152.46

—136.53

127.78

127.52

125.16

122.40

77.48

77.16

76.84

—45.81

0.50

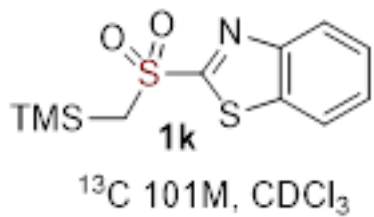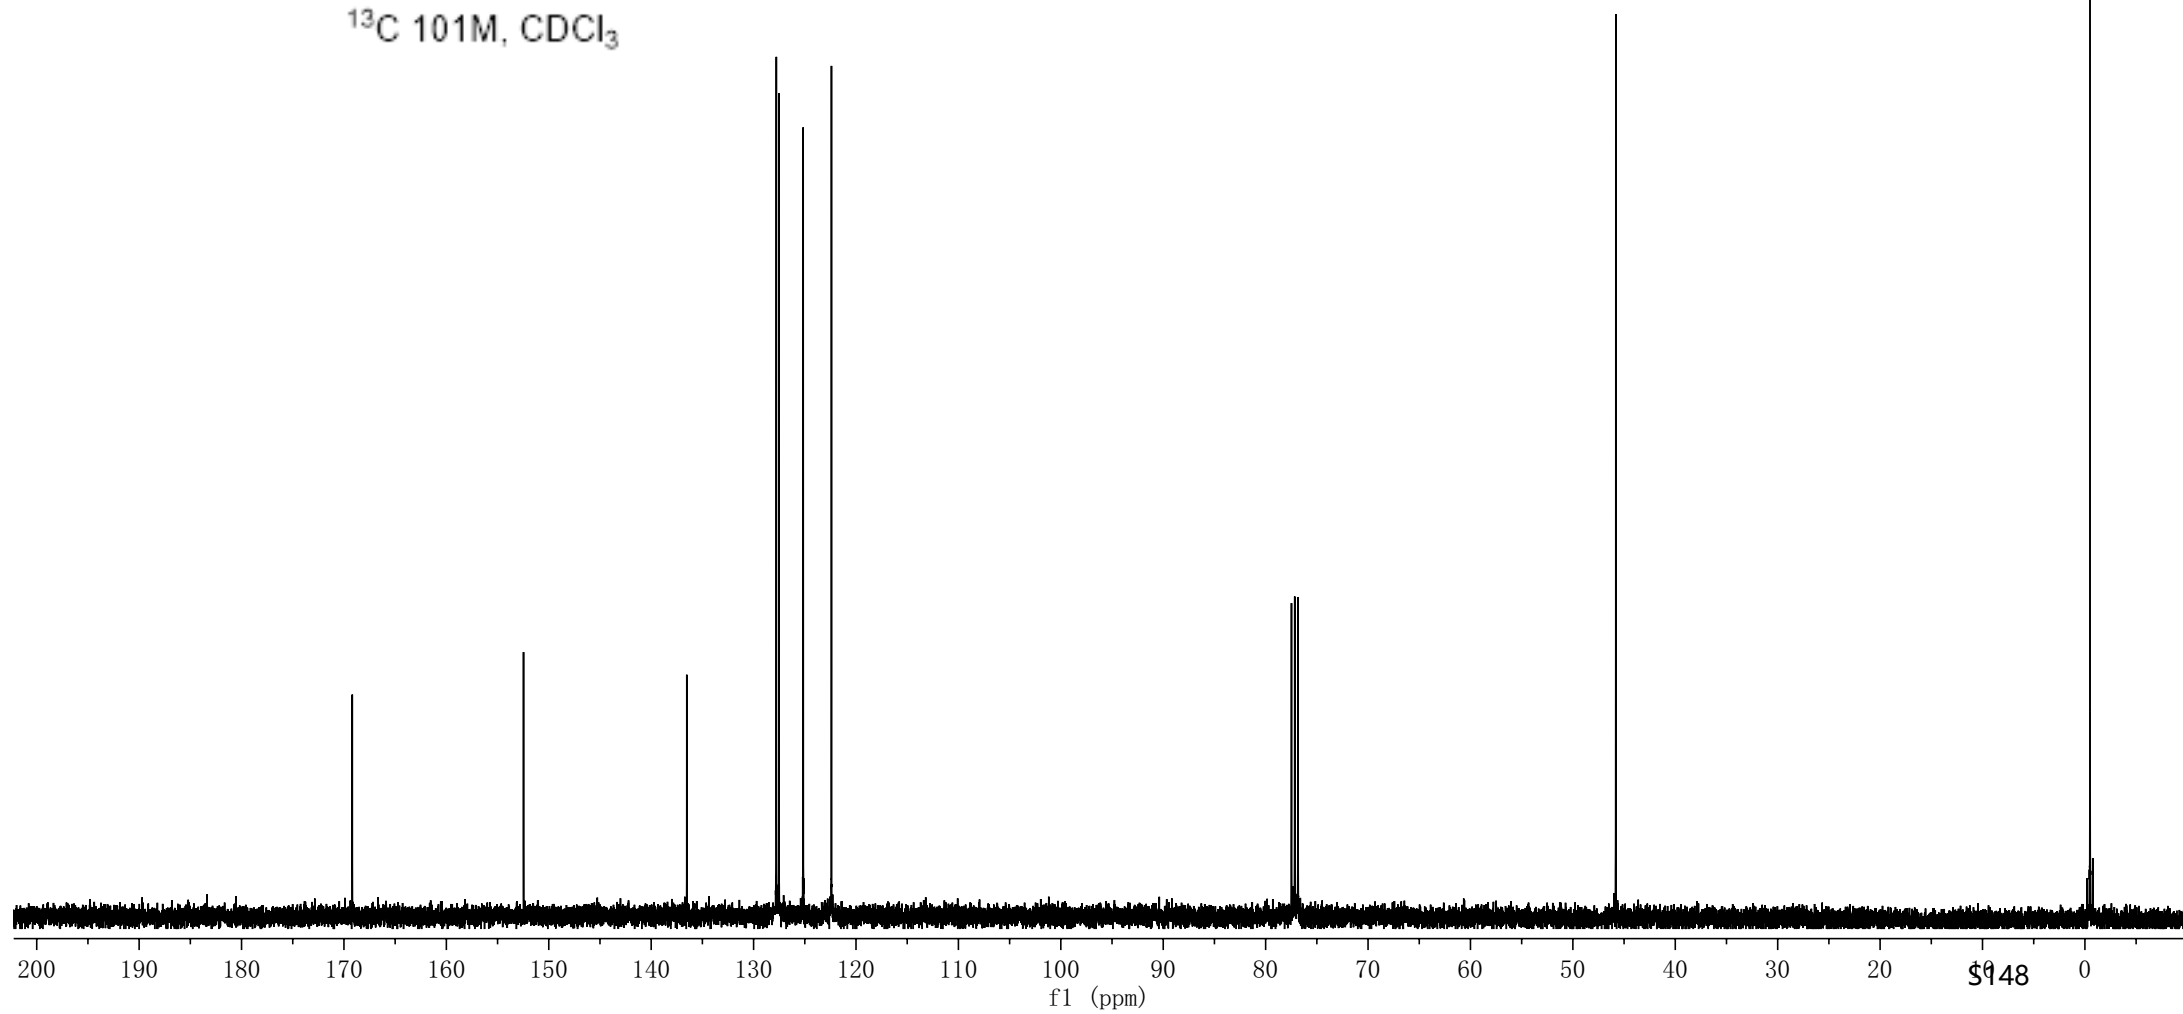

5948

zwjiao-D869-H  
zwjiao-D869-H

—7.26

2.94  
2.92  
2.90  
—2.56

1.78  
1.76  
1.75  
1.74  
1.44  
1.42  
1.40  
1.38  
0.92  
0.90  
0.88

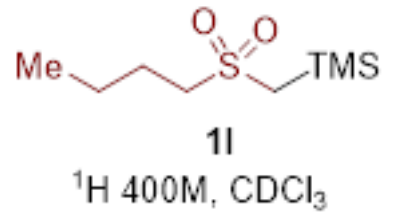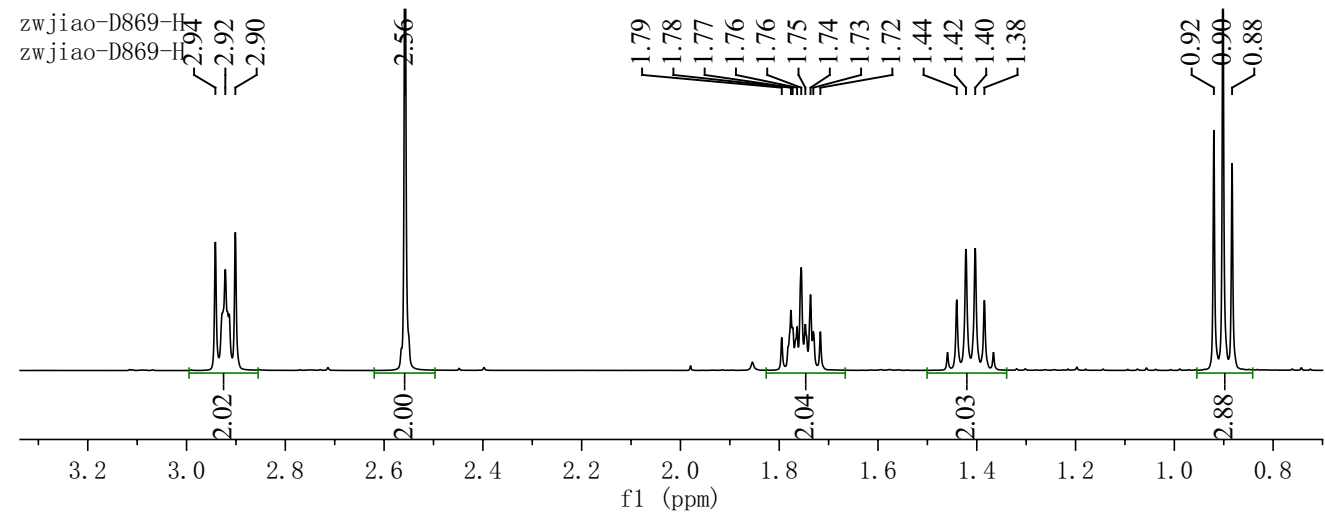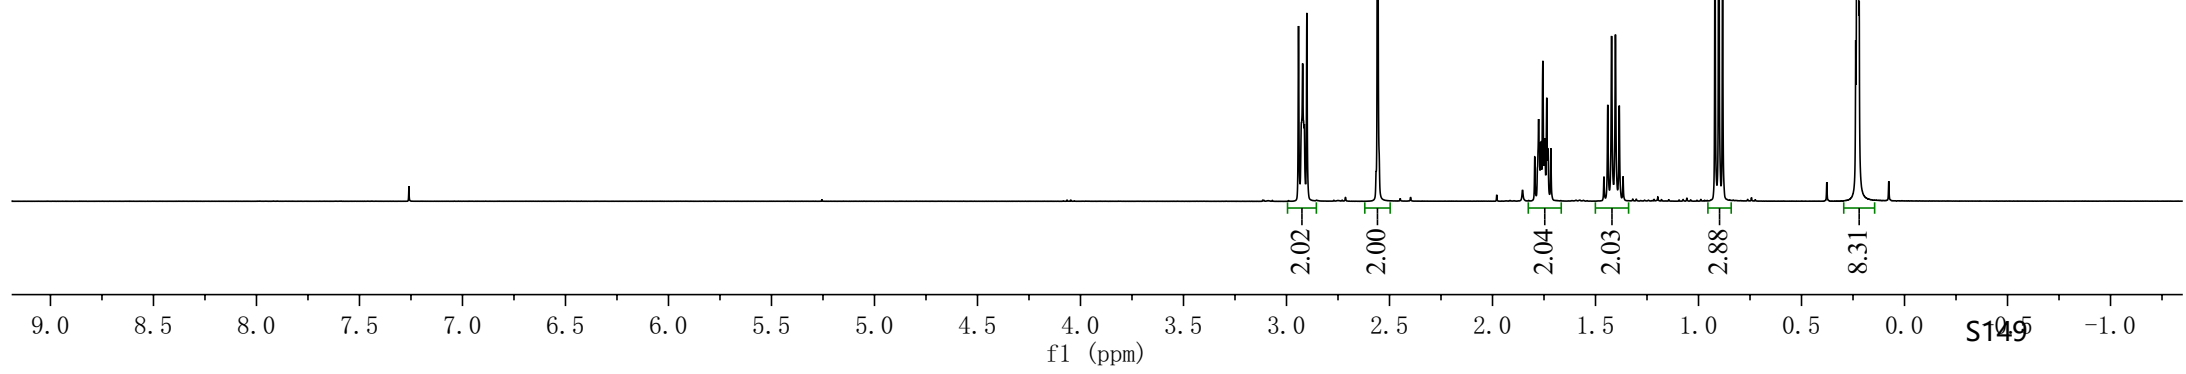

zwjiao-D869-C  
zwjiao-D869-C

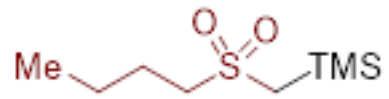

**11**

<sup>13</sup>C 101M, CDCl<sub>3</sub>

77.48  
77.16  
76.84

57.06

43.27

24.83

21.65

13.59

-0.60

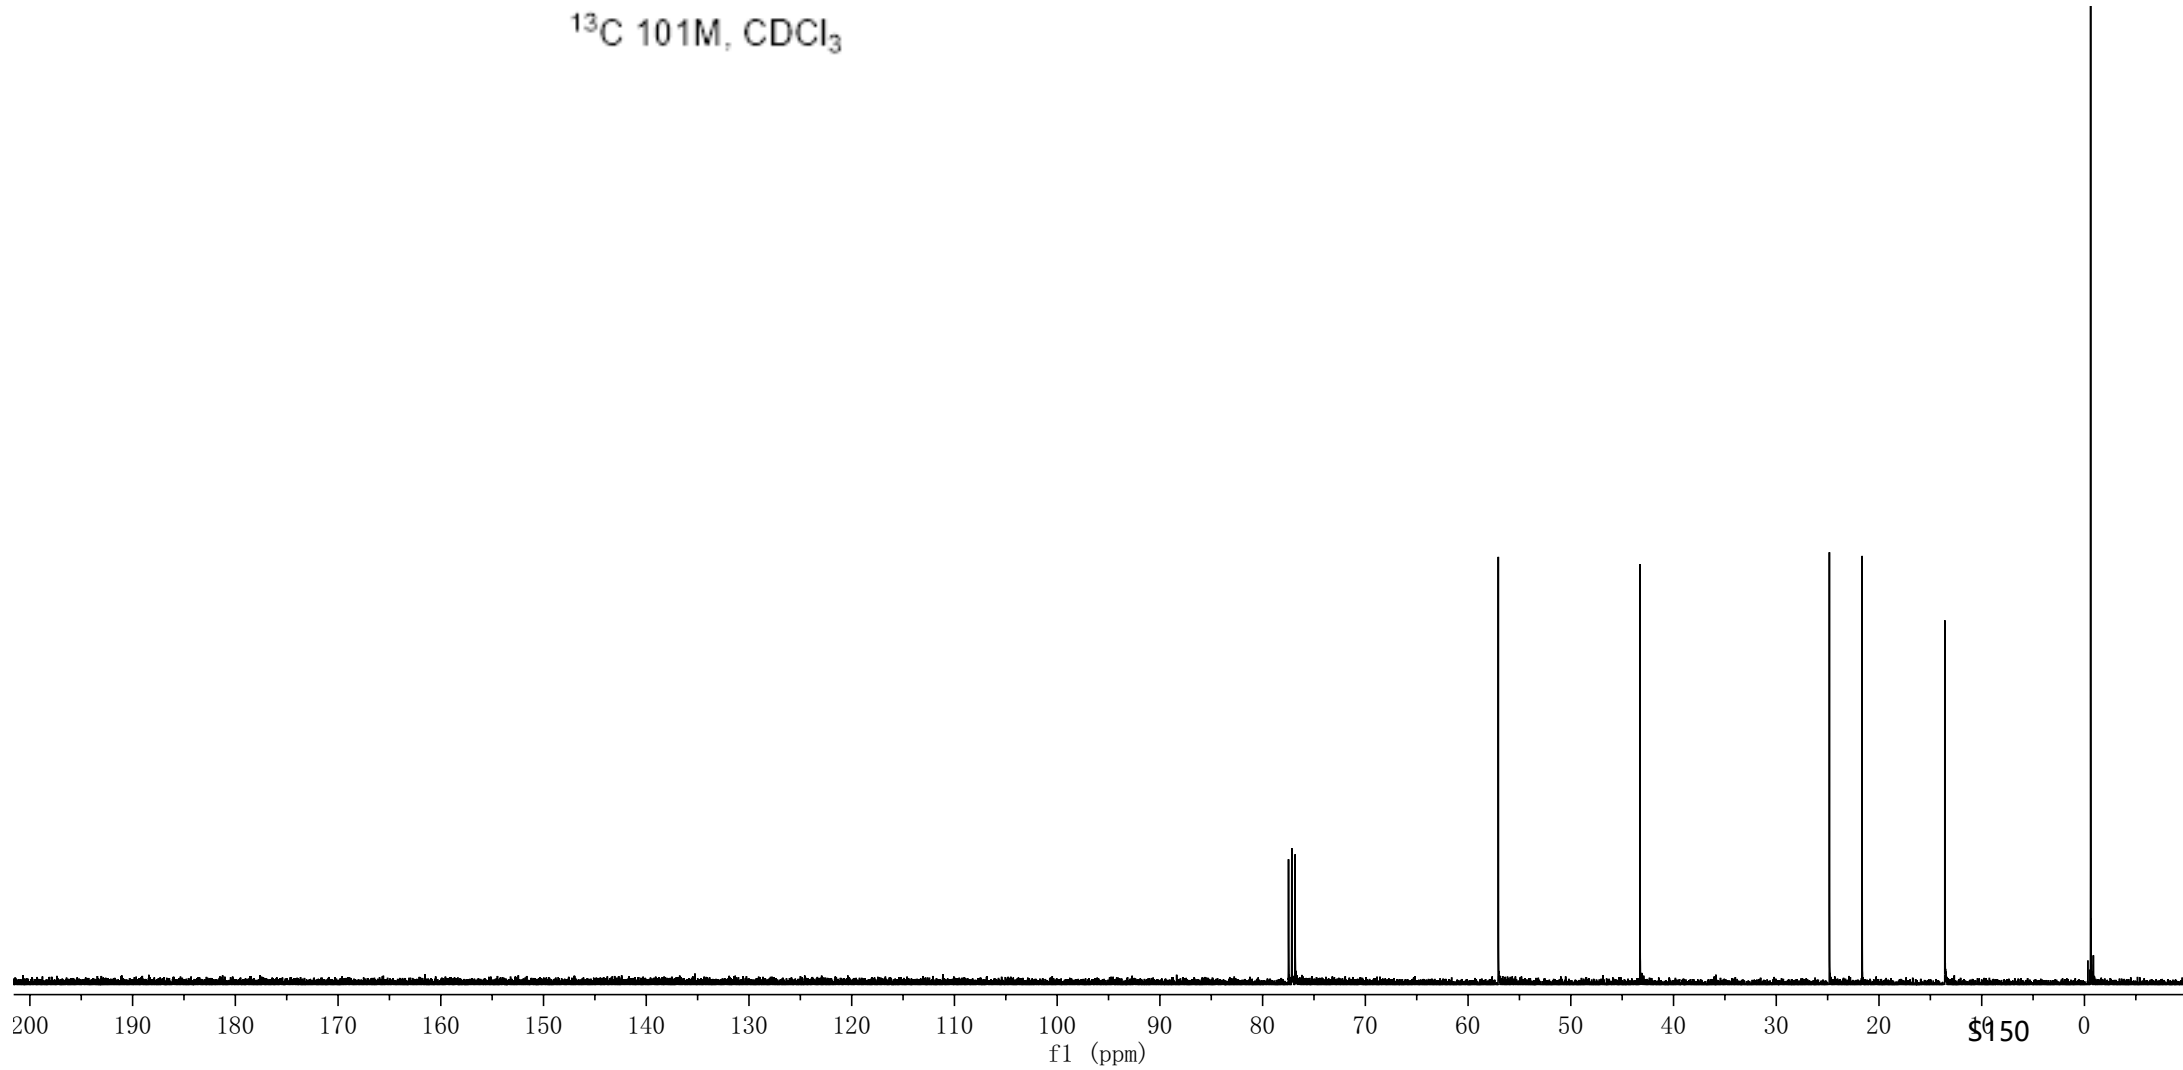

zwjiao-D887-H  
zwjiao-D887-H

—7.26

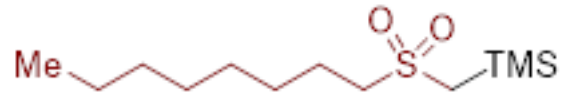

1m

$^1\text{H}$  400M,  $\text{CDCl}_3$

2.96  
2.94  
2.92  
2.57  
1.81  
1.80  
1.79  
1.78  
1.77  
1.77  
1.27  
1.26  
1.24  
0.86  
0.85  
0.83

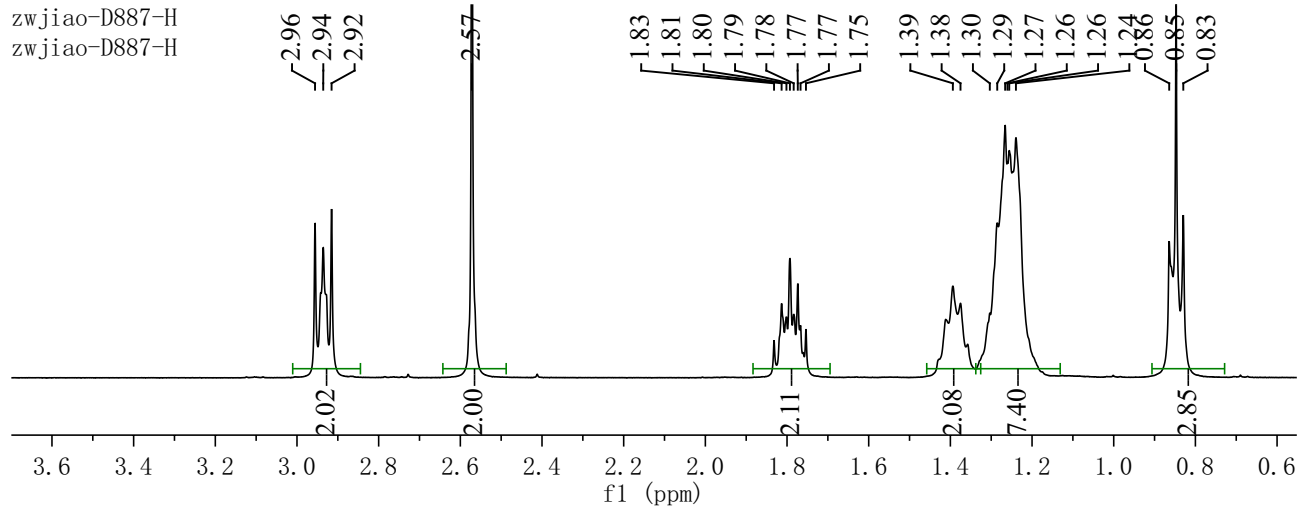

zwjiao-D887-H  
zwjiao-D887-H

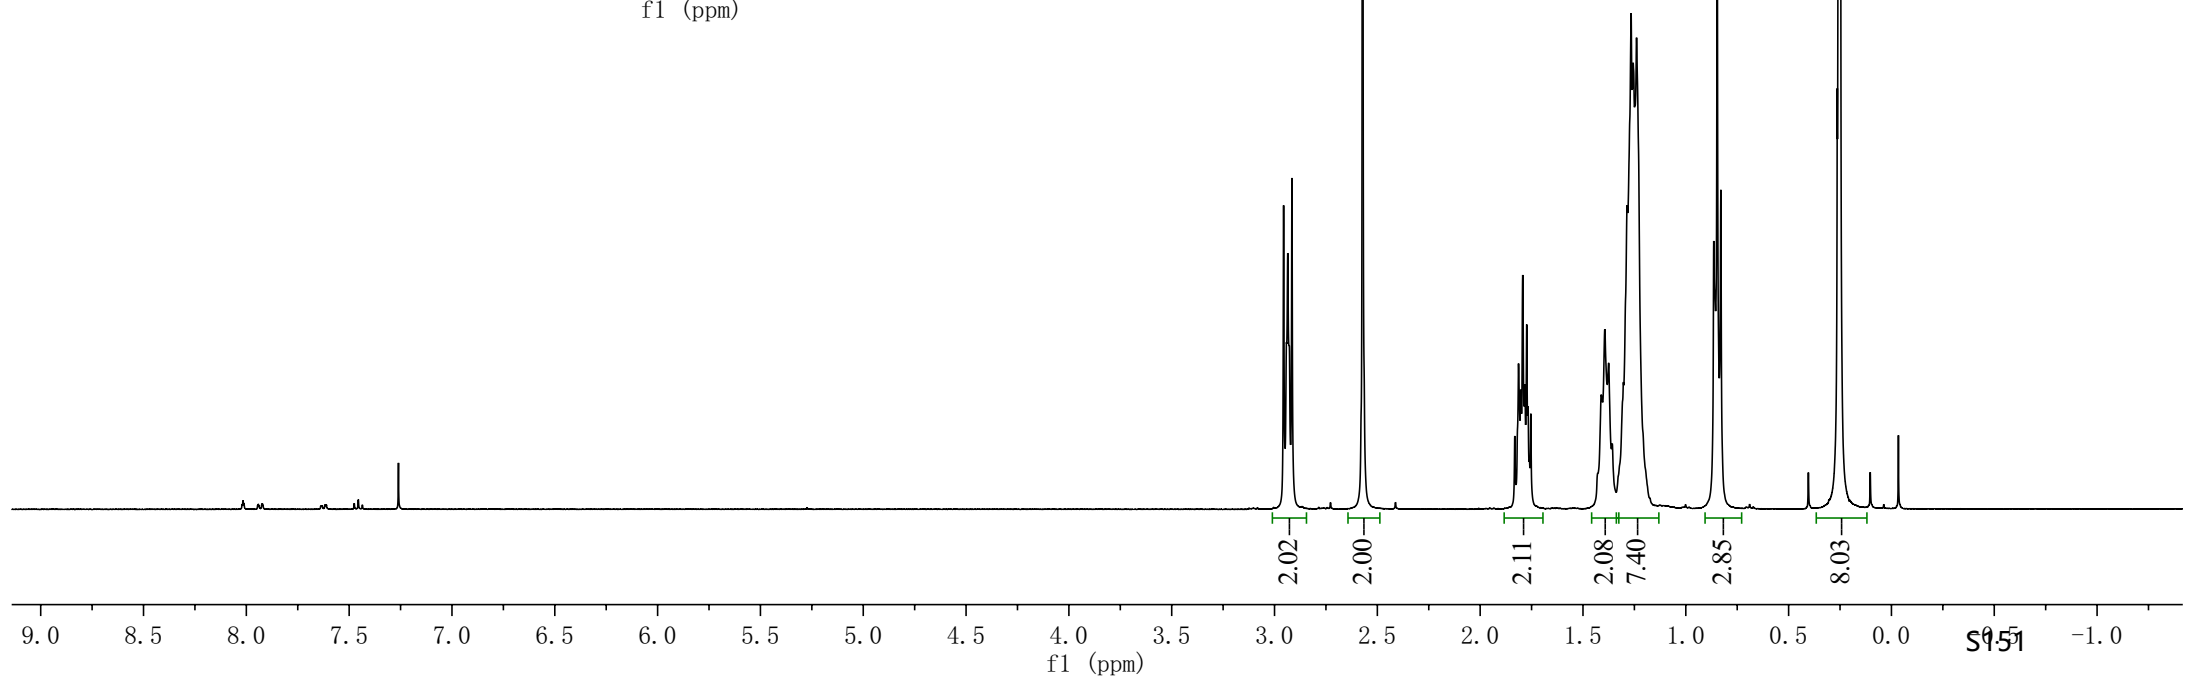

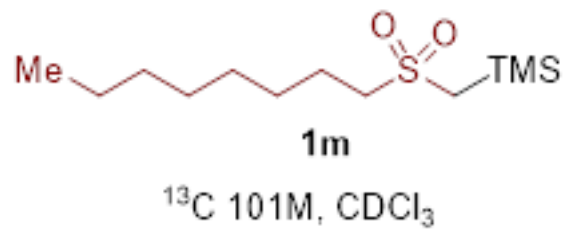

77.48  
77.16  
76.84  
—57.42  
—43.35  
31.76  
29.13  
29.00  
28.47  
22.91  
22.64  
—14.12  
—0.53

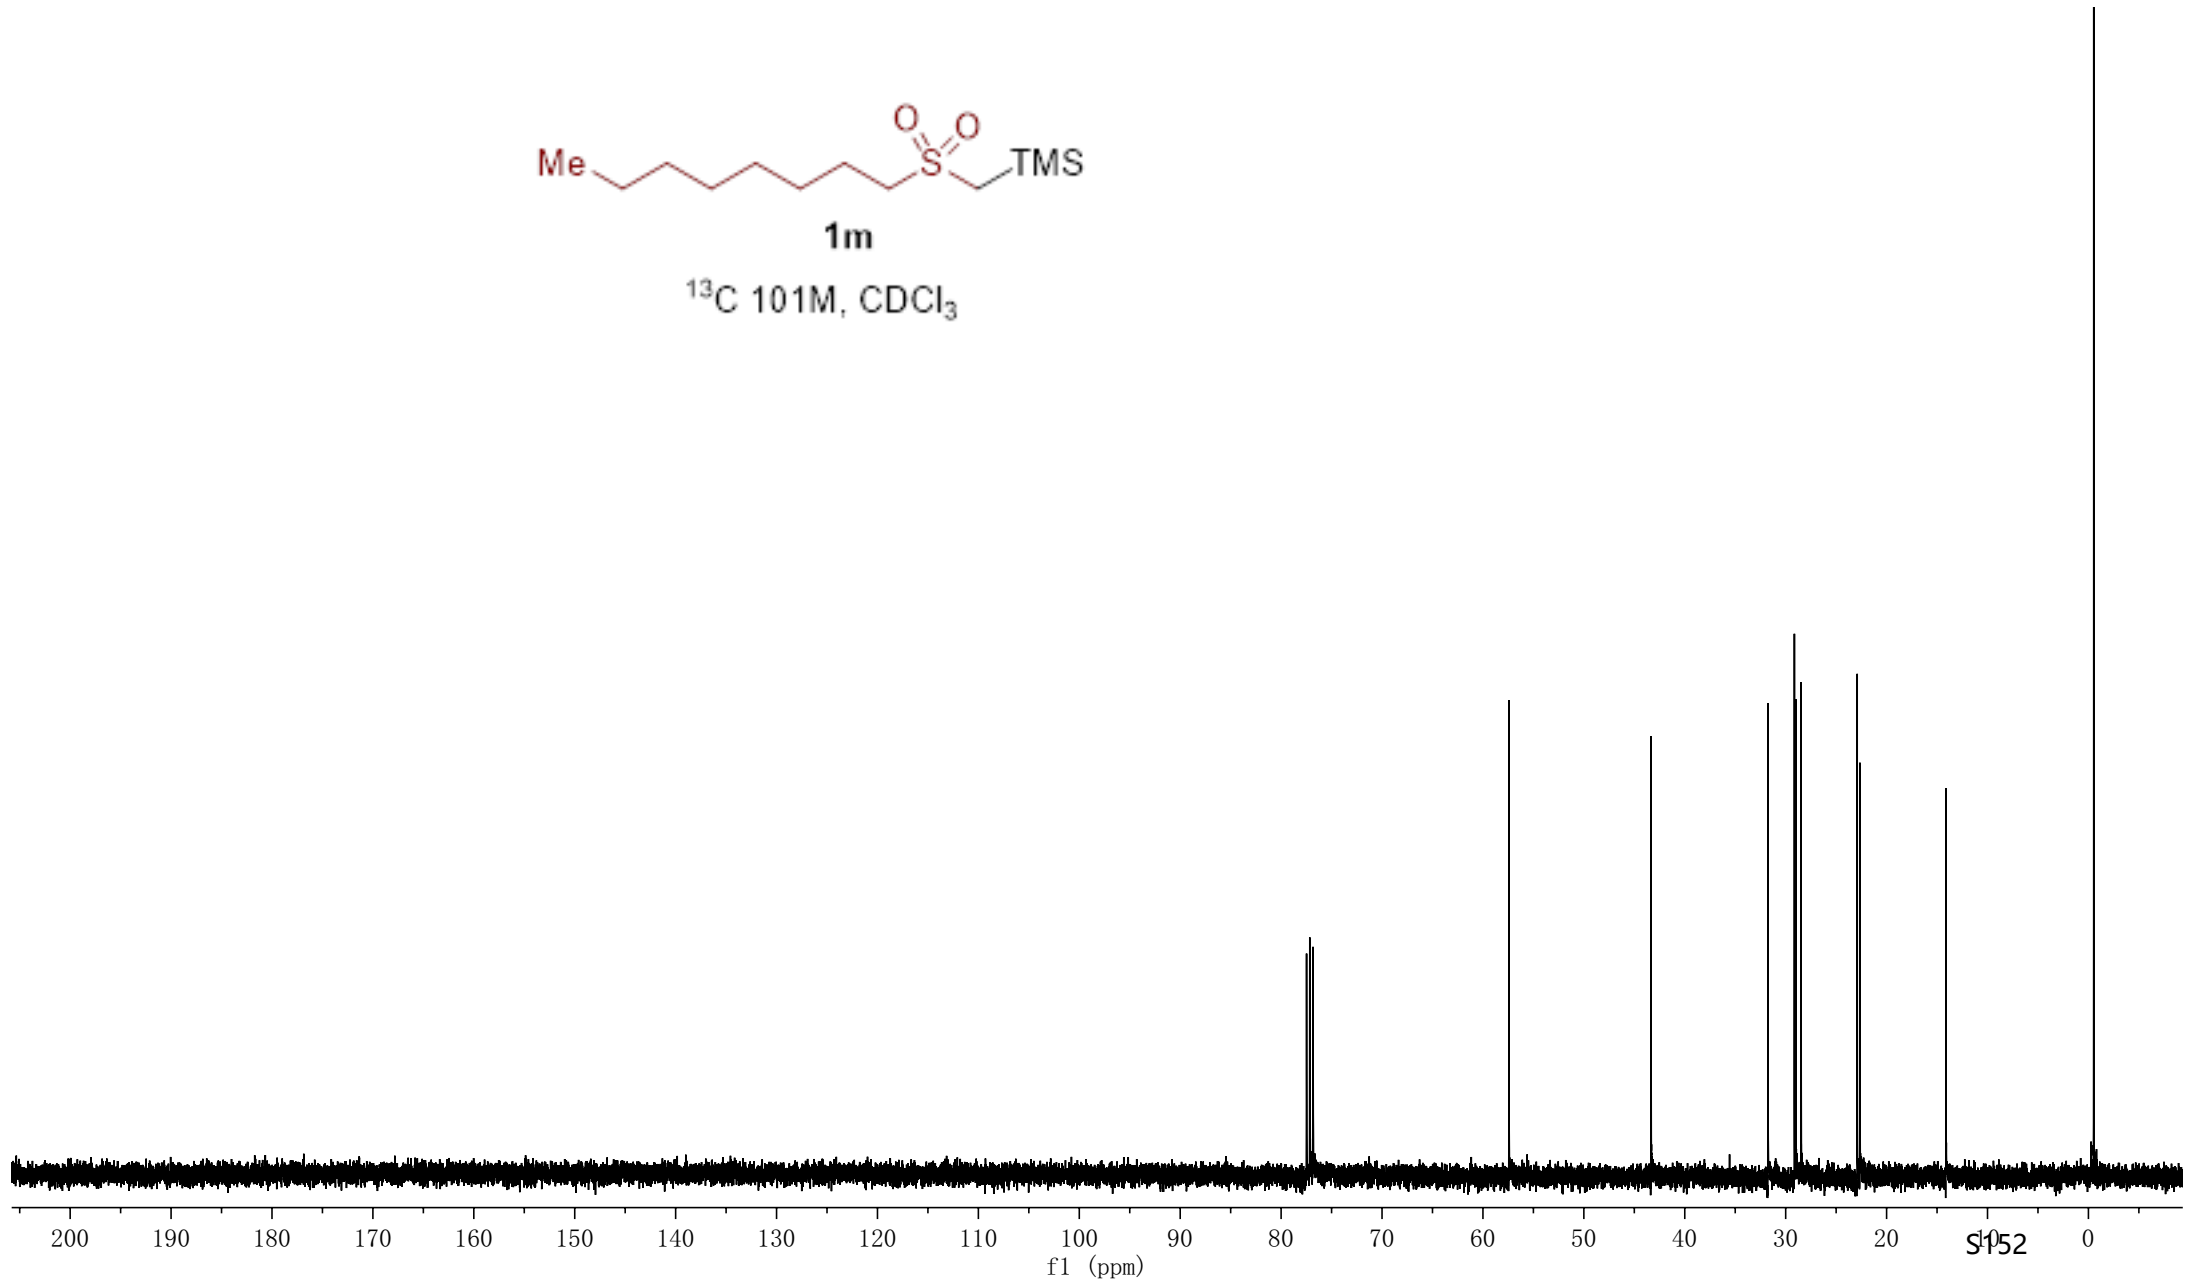



zwjiao-D855-H-1  
zwjiao-D855-H

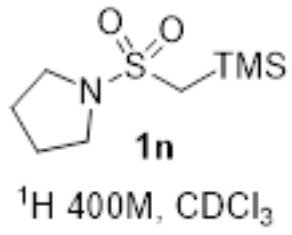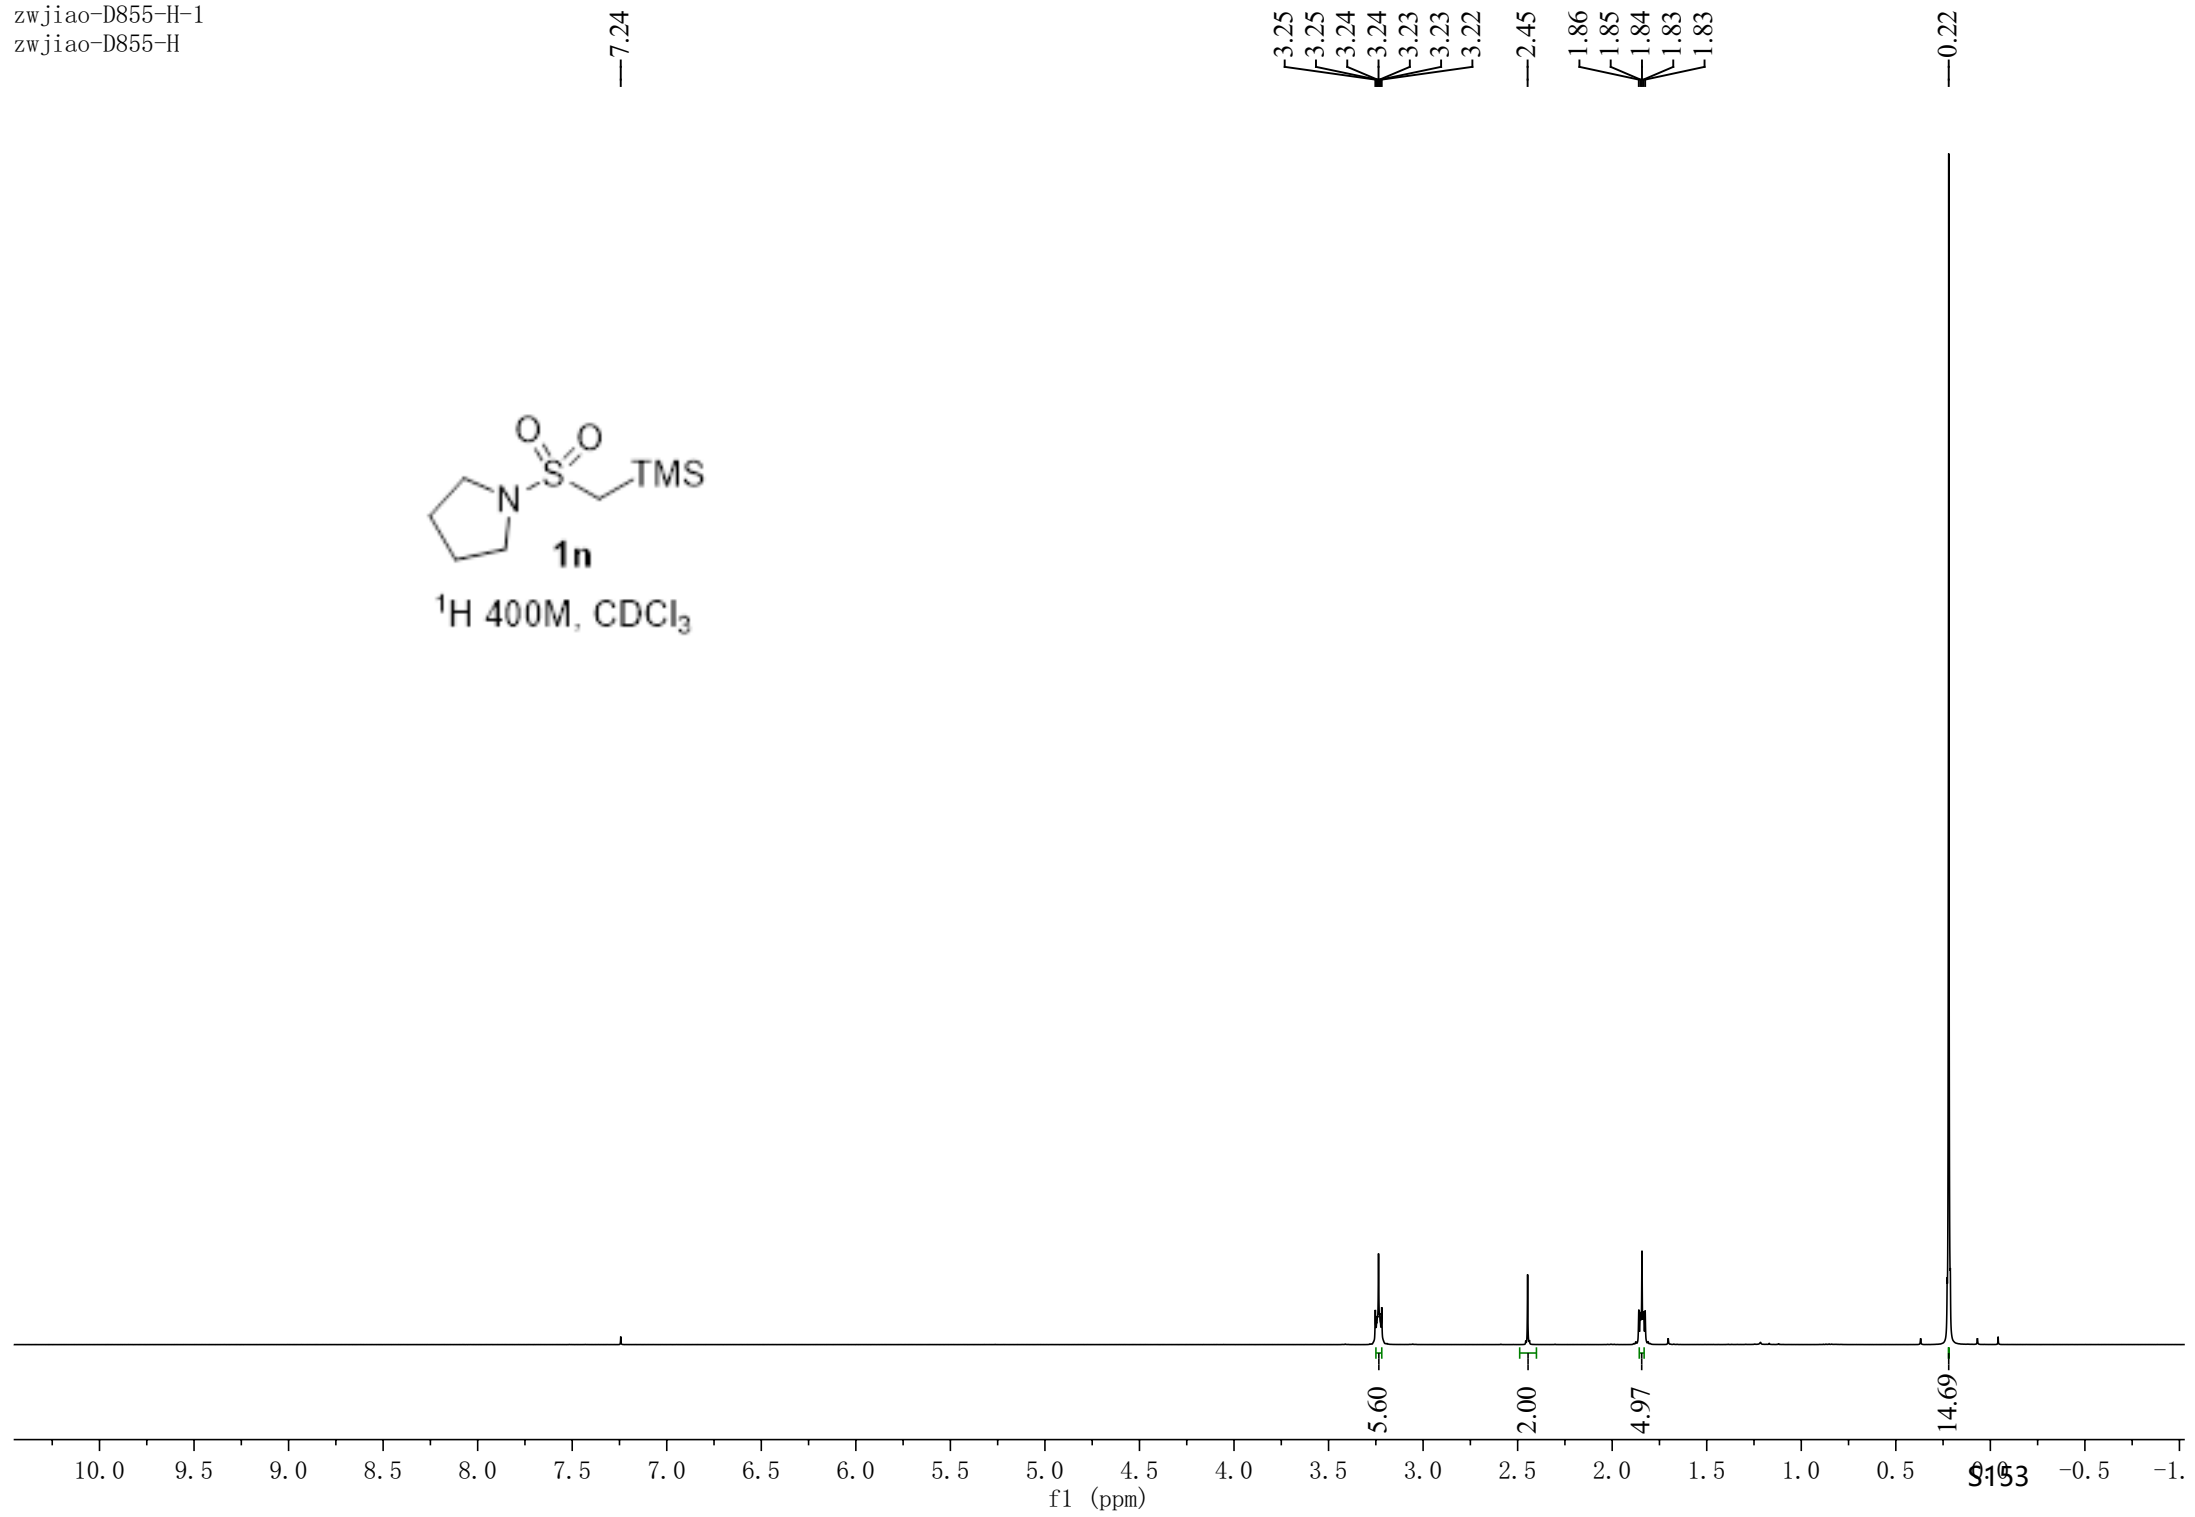

zwjiao-D855-C-1  
zwjiao-D855-C

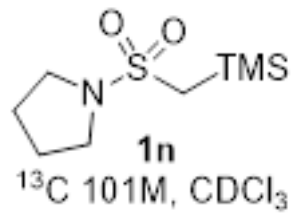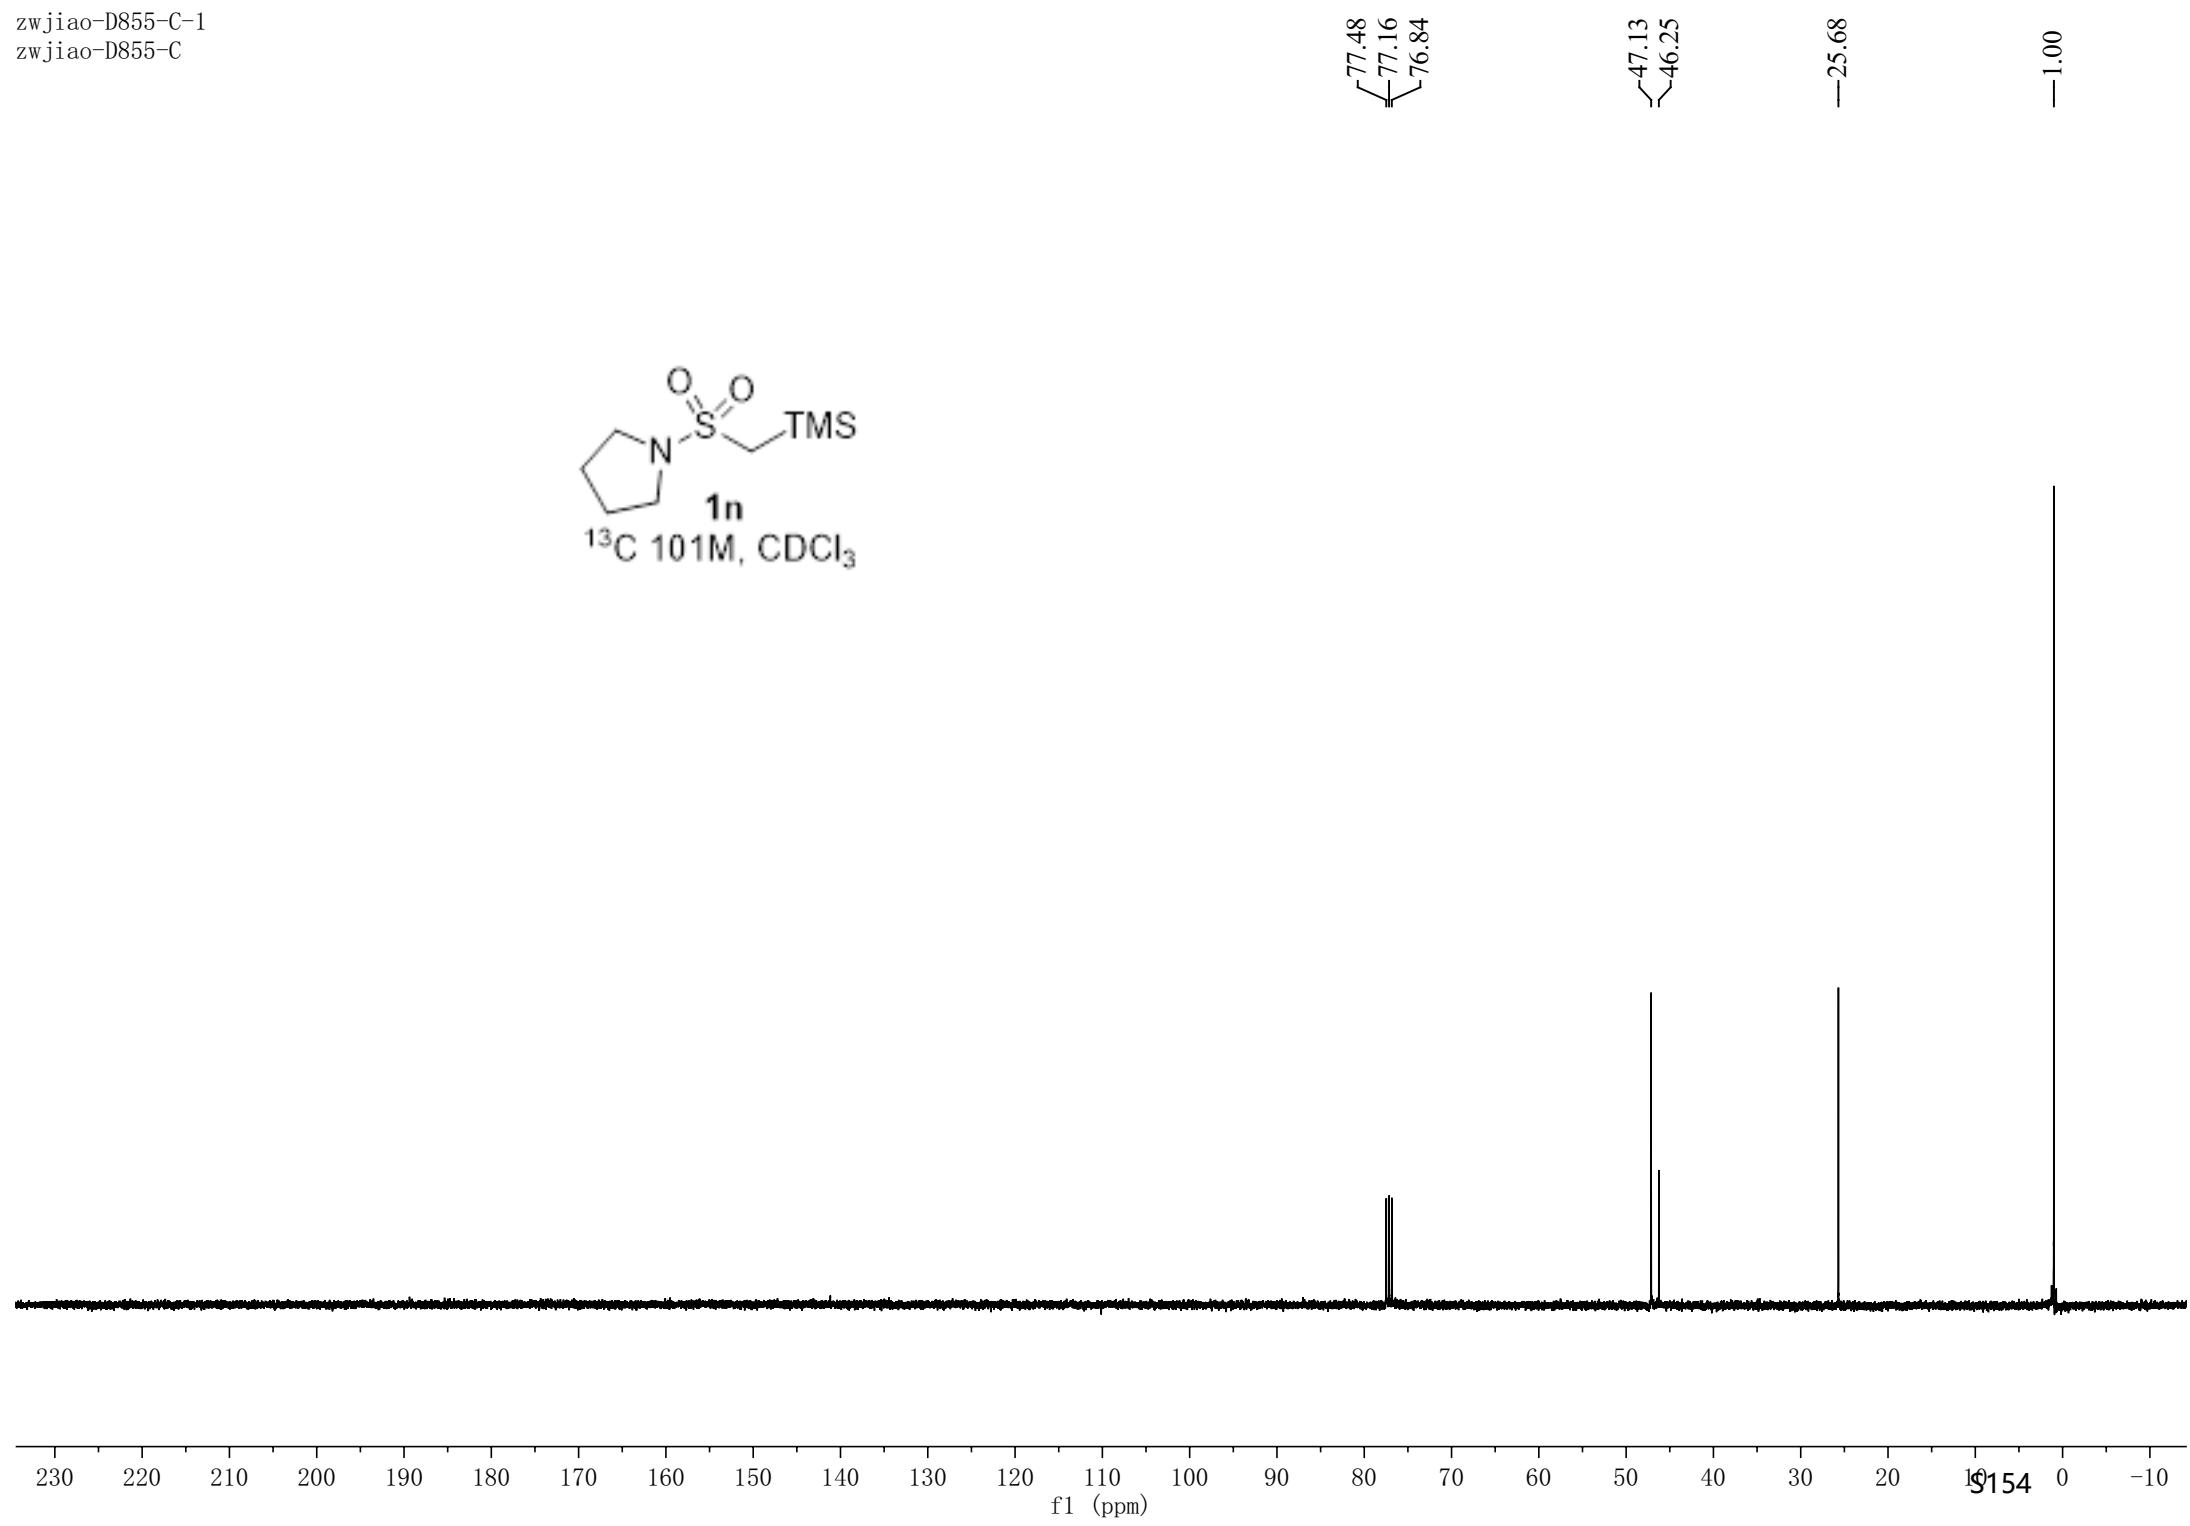

zwjiao-D888-2-H  
zwjiao-D888-2-H

—7.26

3.76  
3.75  
3.74

3.10  
3.09  
3.07

—2.37

—0.24

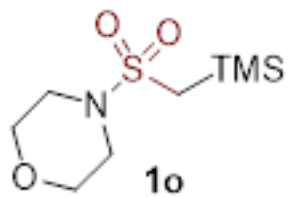

<sup>1</sup>H 400M, CDCl<sub>3</sub>

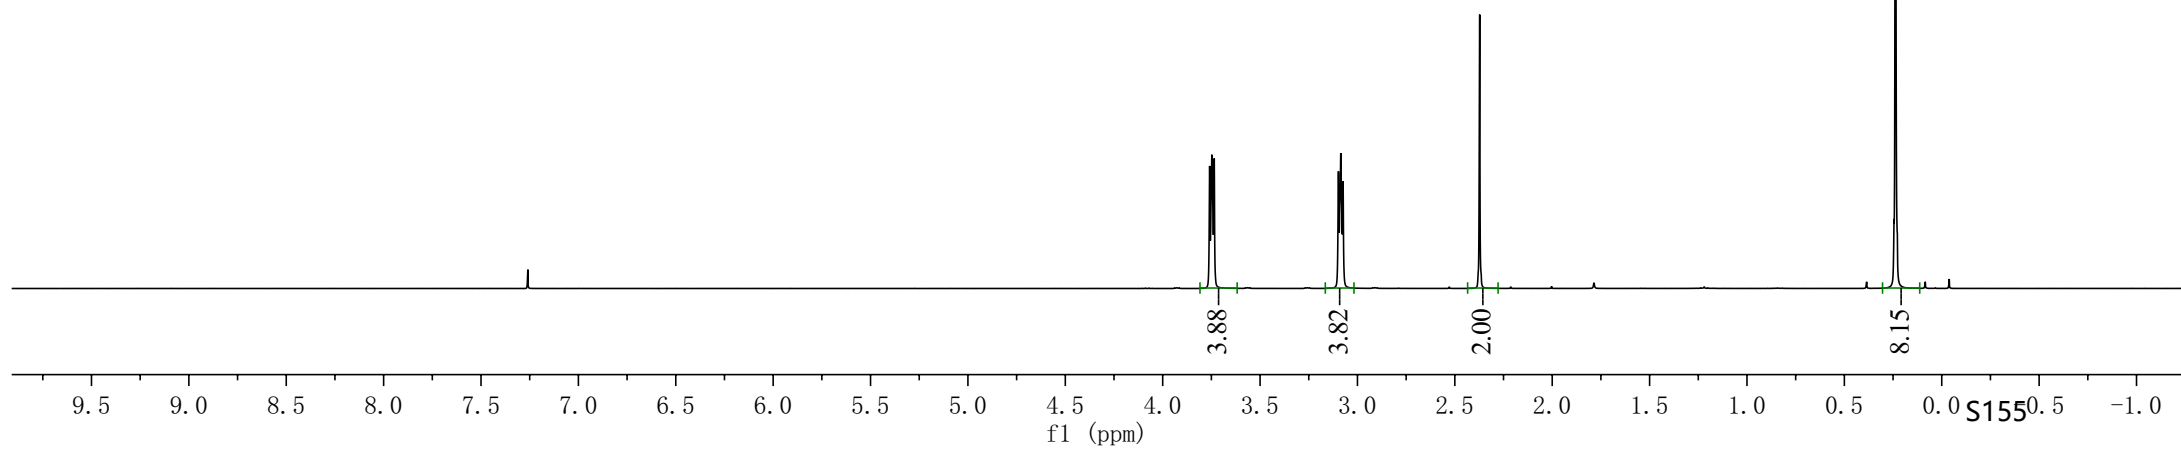

zwjiao-D888-2-C  
zwjiao-D888-2-C

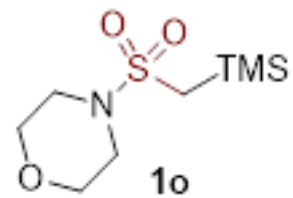

$^{13}\text{C}$  101M,  $\text{CDCl}_3$

77.48  
77.16  
76.84  
66.29  
46.03  
35.69  
-0.83

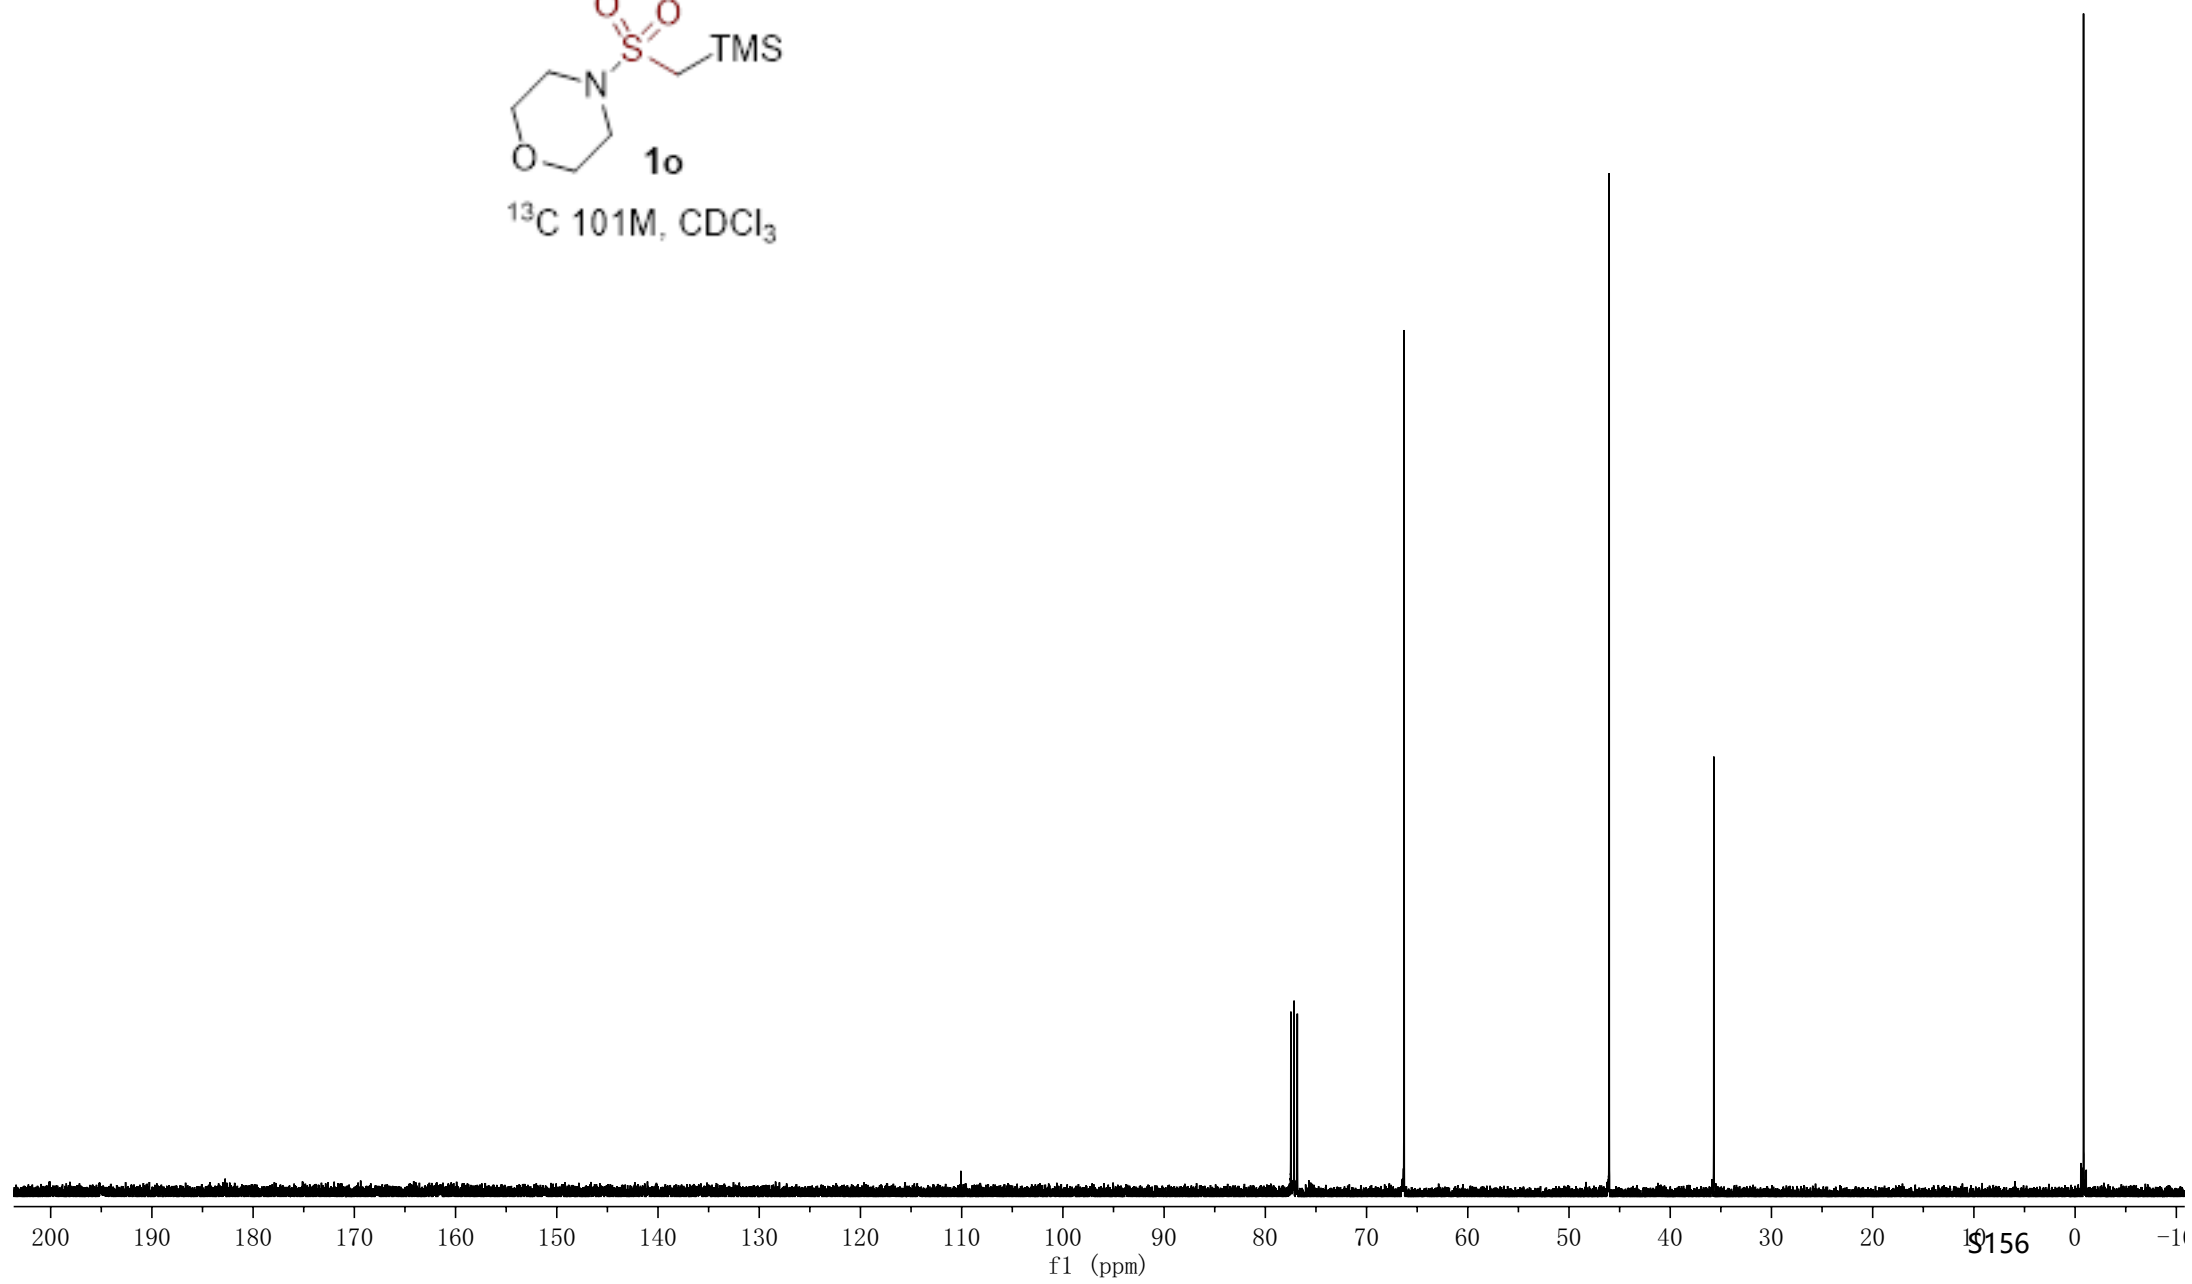

zwjiao-D853-H  
zwjiao-D853-H

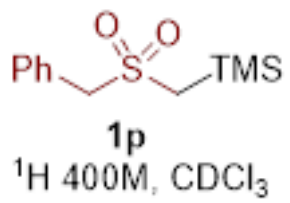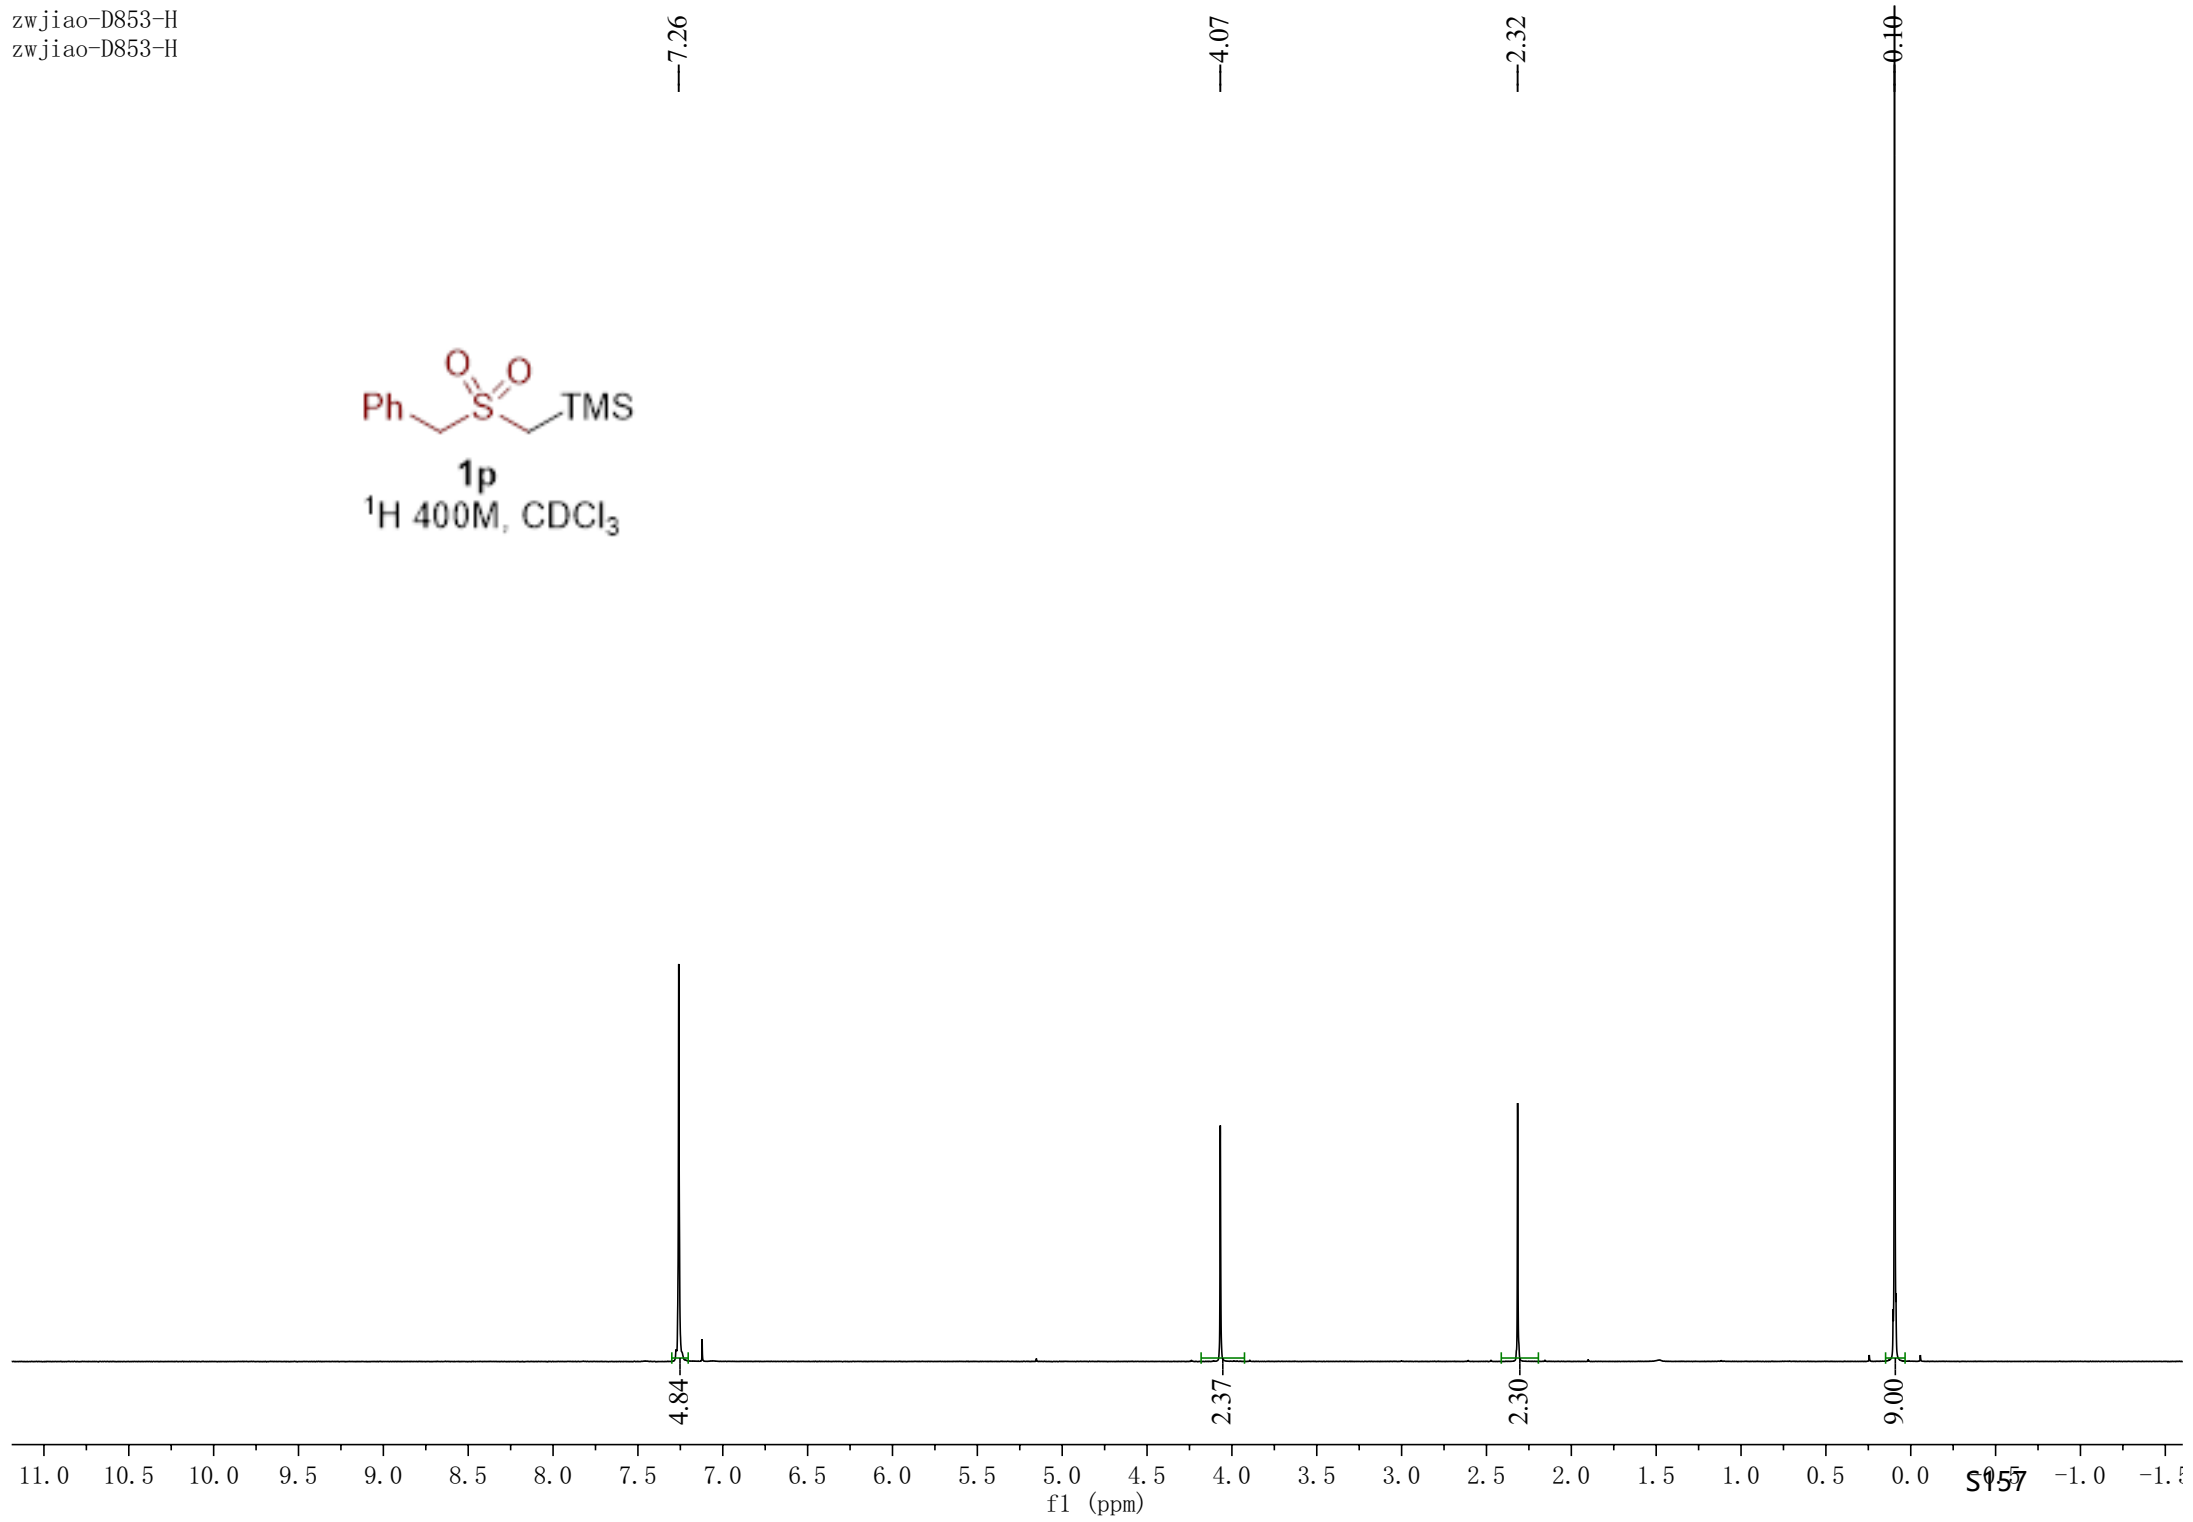

zwjiao-D853-C  
zwjiao-D853-C

130.66  
129.43  
129.08  
128.92

77.48  
77.16  
76.84

63.77

41.86

-0.48

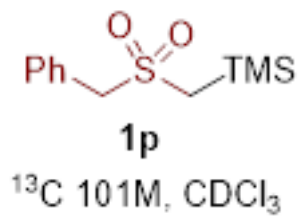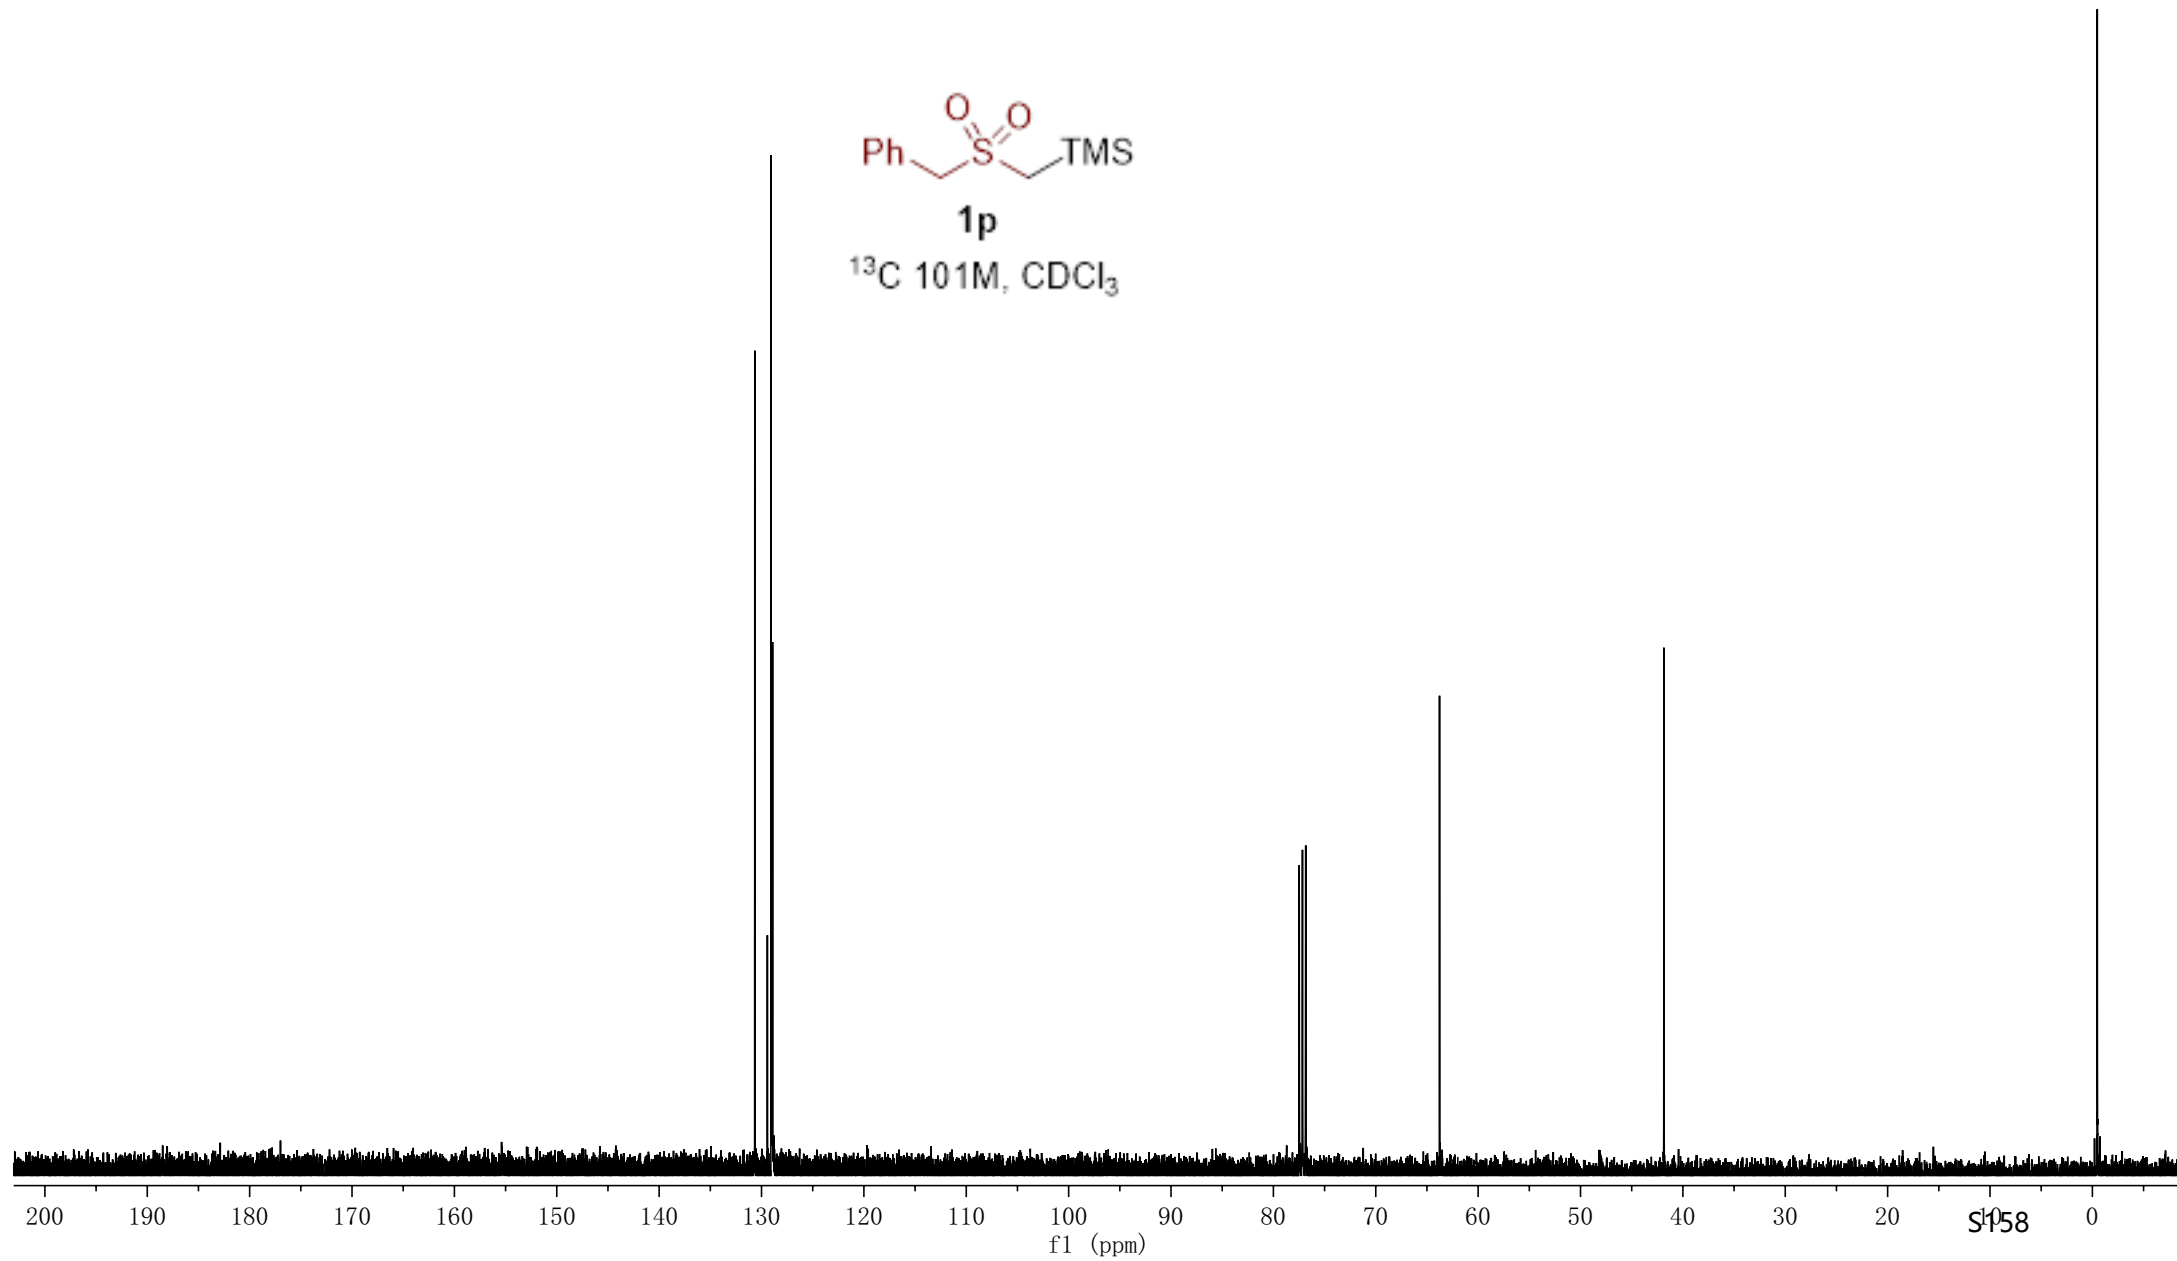

Supplement: d1sc02599f1.pdf [file d1sc02599f1.pdf]
